# Supplementary material for: 1,3-Dipolar cycloaddition of polycyclic azomethine ylide to norcorroles: towards dibenzoullazine-fused derivatives
Source: Royal Society of Chemistry journal article supplement (doi:10.1039/d2cc02071h), 2022-01-01
Supplement: d2cc02071h1.pdf [file d2cc02071h1.pdf]

## Table of Contents

|                                                                                                                                                                                         |                  |
|-----------------------------------------------------------------------------------------------------------------------------------------------------------------------------------------|------------------|
| <b>General methods and instrumentation</b>                                                                                                                                              | <b>S2</b>        |
| <b>Computational methods</b>                                                                                                                                                            | <b>S2</b>        |
| <b>Syntheses and characterizations</b>                                                                                                                                                  | <b>S3</b>        |
| <b>Figures S1-S6.</b> 1D and 2D NMR spectra of <b>2a</b>                                                                                                                                | <b>S14-S18</b>   |
| <b>Figure S7.</b> <sup>1</sup> H NMR signal assignments for <b>2a</b>                                                                                                                   | <b>S19</b>       |
| <b>Figures S8-S13.</b> 1D and 2D NMR spectra of <b>2b</b>                                                                                                                               | <b>S20-S24</b>   |
| <b>Figures S14.</b> <sup>1</sup> H NMR signal assignments for <b>2b</b>                                                                                                                 | <b>S25</b>       |
| <b>Figures S15-S20.</b> 1D and 2D NMR spectra of <b>3-duud</b>                                                                                                                          | <b>S26-S30</b>   |
| <b>Figure S21.</b> <sup>1</sup> H NMR signal assignments for <b>3-duud</b>                                                                                                              | <b>S31</b>       |
| <b>Figures S22-S27.</b> 1D and 2D NMR spectra of <b>3-udud</b>                                                                                                                          | <b>S32-S36</b>   |
| <b>Figure S28.</b> <sup>1</sup> H NMR signal assignments for <b>3-udud</b>                                                                                                              | <b>S37</b>       |
| <b>Figures S29-S34.</b> 1D and 2D NMR spectra of <b>3-uduu</b>                                                                                                                          | <b>S38-S42</b>   |
| <b>Figure S35.</b> <sup>1</sup> H NMR signal assignments for <b>3-uduu</b>                                                                                                              | <b>S43</b>       |
| <b>Figures S36-S41.</b> 1D and 2D NMR spectra of <b>4</b>                                                                                                                               | <b>S48</b>       |
| <b>Figure S42.</b> <sup>1</sup> H NMR signal assignments for <b>4</b>                                                                                                                   | <b>S49</b>       |
| <b>Figures S43-S48.</b> 1D and 2D NMR spectra of <b>5-uduu</b>                                                                                                                          | <b>S50-S54</b>   |
| <b>Figure S49.</b> <sup>1</sup> H NMR signal assignments for <b>5-uduu</b>                                                                                                              | <b>S55</b>       |
| <b>Figures S50-S55.</b> 1D and 2D NMR spectra of <b>5-udud</b>                                                                                                                          | <b>S56-S60</b>   |
| <b>Figure S56.</b> <sup>1</sup> H NMR signal assignments for <b>5-udud</b>                                                                                                              | <b>S61</b>       |
| <b>Figures S57-S62.</b> 1D and 2D NMR spectra of <b>6</b>                                                                                                                               | <b>S62-S66</b>   |
| <b>Figure S63.</b> <sup>1</sup> H NMR signal assignments for <b>6</b>                                                                                                                   | <b>S67</b>       |
| <b>Figures S64-S69.</b> 1D and 2D NMR spectra of <b>7</b>                                                                                                                               | <b>S68-S72</b>   |
| <b>Figure S70.</b> <sup>1</sup> H NMR signal assignments for <b>7</b>                                                                                                                   | <b>S73</b>       |
| <b>Figures S71,S72.</b> 1D and 2D NMR spectra of <b>8</b>                                                                                                                               | <b>S74,S75</b>   |
| <b>Figure S73.</b> <sup>1</sup> H NMR signal assignments for <b>8</b>                                                                                                                   | <b>S76</b>       |
| <b>Figures S74-S84.</b> Experimental (ESI(+)) and simulated high-resolution mass spectra for the compounds <b>2-8</b>                                                                   | <b>S77-S87</b>   |
| <b>Figures S85-S95.</b> UV-vis spectra of the compounds <b>2-8</b> in dichloromethane                                                                                                   | <b>S88-S93</b>   |
| <b>Figures S96-107.</b> Correlations of experimental and GIAO-calculated <sup>1</sup> H NMR chemical shifts of the compounds <b>2-8</b>                                                 | <b>S93-S99</b>   |
| <b>Figures S108-117.</b> Correlations of experimental and GIAO-calculated <sup>13</sup> C NMR chemical shifts of the compounds <b>2-7</b>                                               | <b>S99-S104</b>  |
| <b>Table S1.</b> NICS( <i>z</i> ) ( <i>z</i> = 1, 0, -1) for the systems <b>3-8</b> .                                                                                                   | <b>S104</b>      |
| <b>Table S1A.</b> Selected NICS(1) indices (in ppm) calculated for the systems <b>3-8</b>                                                                                               | <b>S109</b>      |
| <b>Figure S118.</b> Chiral stationary phase HPLC profiles for <b>2a</b>                                                                                                                 | <b>S109</b>      |
| <b>Figures S119-S134.</b> Experimental and TD DFT-calculated ECD spectra of the enantiomers of the compounds <b>2-7</b>                                                                 | <b>S110-S124</b> |
| <b>Figure S135.</b> Absorption and ECD spectra of the enantiomers of <b>2-7</b> in dichloromethane                                                                                      | <b>S125</b>      |
| <b>Table S2-S13.</b> TD DFT-calculated electronic transitions for the compounds <b>2-8</b>                                                                                              | <b>S126-S149</b> |
| <b>Figure S136.</b> Out-of-plane displacements for norcorrolatonicel(II) moiety in <b>2a</b> and <b>4</b>                                                                               | <b>S150</b>      |
| <b>Figure S137.</b> Out-of-plane displacement for norcorrolatonicel(II) moiety in the stereoisomers of <b>3</b>                                                                         | <b>S151</b>      |
| <b>Figure S138.</b> Out-of-plane displacement for norcorrolatonicel(II) moiety in the stereoisomers of <b>5</b>                                                                         | <b>S152</b>      |
| <b>Figure S139.</b> Out-of-plane displacement for norcorrolatopalladium(II)                                                                                                             | <b>S153</b>      |
| <b>Figure S140.</b> A part of the packing diagram and out-of-plane displacement of <b>6</b>                                                                                             | <b>S154</b>      |
| <b>Figure S141.</b> A part of the packing diagram and out-of-plane displacement of <b>7</b>                                                                                             | <b>S155</b>      |
| <b>Figure S142.</b> A part of the packing diagram and out-of-plane displacement of <b>8</b>                                                                                             | <b>S156</b>      |
| <b>Figure S143.</b> DFT-calculated structures of conformers <b>8</b> and <b>8b</b> and out-of-plane displacements of the conformers                                                     | <b>S157</b>      |
| <b>Figures S144-S154.</b> Cyclic and differential pulse voltammograms of the compounds <b>2-8</b> in dichloromethane.                                                                   | <b>S158-S163</b> |
| <b>Table S14.</b> Crystallographic data for <b>3-duud</b> , <b>3-udud</b> , and <b>4</b>                                                                                                | <b>S164</b>      |
| <b>Table S15.</b> Crystallographic data for <b>5-uduu</b> , <b>5-udud</b> , and <b>6</b>                                                                                                | <b>S165</b>      |
| <b>Table S16.</b> Crystallographic data for <b>7</b> and <b>8</b>                                                                                                                       | <b>S166</b>      |
| <b>Figure S155-S162.</b> Perspective plots of the molecular structures of <b>3-duud</b> , <b>3-udud</b> , <b>4</b> , <b>5-uduu</b> , <b>5-udud</b> , <b>6</b> , <b>7</b> , and <b>8</b> | <b>S167-S170</b> |
| <b>Table S17.</b> Computational details for the optimized structures of compounds                                                                                                       | <b>S171</b>      |
| <b>Table S18.</b> Normal-coordinate structure decomposition analyses of deviations from planarity in selected norcorrole derivatives                                                    | <b>S172</b>      |
| <b>Table S19.</b> Electrochemical data for the compounds <b>1-8</b>                                                                                                                     | <b>S173</b>      |
| <b>References</b>                                                                                                                                                                       | <b>S17</b>       |

## General methods and instrumentation

Commercial reagents were used without further purification. Solvents were freshly distilled from the appropriate drying agents or purified under nitrogen with the mBraun MBSPS-800 before use. The analytical TLCs were performed with silica gel 60 F254 plates. Column chromatography was performed by using silica gel 60 (200-300 mesh ASTM). The NMR spectra were recorded on a Bruker Avance II spectrometer, operating at 500 MHz for  $^1\text{H}$  and 125 MHz for  $^{13}\text{C}$  or a Bruker Avance II spectrometer operating at 600 MHz for  $^1\text{H}$  and 150 MHz for  $^{13}\text{C}$ . TMS was used as an internal reference for  $^1\text{H}$  and  $^{13}\text{C}$  chemical shifts and  $\text{CDCl}_3$  was used as solvent. Standard pulse programs from the Bruker library were used for homo- and heteronuclear 2D experiments. Mass spectrometry measurements were conducted by using the electrospray ionization technique on Finnigan LCQ Advantage MAX mass spectrometer (APCI) or Bruker apex ultra FT-ICR (ESI). Absorption UV/Vis/NIR spectra were recorded by using a Varian Cary 50 Bio and Jasco V-770 spectrophotometers. Circular dichroism spectra were recorded by means of Jasco J-1500 spectropolarimeter. Enantiomers resolutions were performed by means of HPLC on a chiral stationary phase analytical column Chirex 3010 (25x0.46 cm) with Merck/Hitachi chromatograph equipped with an optical flow cell mounted on the Jasco CD spectrophotometer. Electrochemical measurements were performed by means of Autolab (Metrohm) potentiostat/galvanostat system for dichloromethane solutions with a glassy carbon, a platinum wire, and  $\text{Ag}/\text{Ag}^+$  as the working, auxiliary, and reference electrodes, respectively. Tetrabutylammonium hexafluorophosphate was used as a supporting electrolyte. The potentials were referenced with the ferrocene/ferrocenium couple used as an internal standard. X-ray diffraction data are summarized in Tables S14-S16. The structures were solved by direct methods with SHELXS97<sup>[1]</sup> and refined by the full-matrix least-squares method on all  $F^2$  data by using the SHELXL-2016/6 incorporated in the shelXle program<sup>[1,2]</sup>. All hydrogen atoms, including those located in the difference density map, were placed in calculated positions and refined as the riding model.

## Computational methods

Density functional theory (DFT) calculations were performed by using the Gaussian 09 program<sup>[3]</sup>. DFT geometry optimizations were carried out in the unconstrained  $C_1$  symmetry by using the X-ray structures, molecular mechanics, or semiempirical models as starting geometries. DFT geometries were refined to meet standard convergence criteria, and the existence of a local minimum was verified by a normal mode frequency calculation. DFT calculations were performed by using the hybrid B3LYP functional,<sup>[4-6]</sup> and the 6-31G(d,p) basis set. The electronic spectra were simulated by means of time-dependent density functional theory (TD-DFT) using the Tamm-Dancoff approximation for 50 states. For TD calculations, the polarizable continuum model of solvation was used (PCM, standard chloroform parametrization). The electronic transitions and UV/Vis/NIR spectra were analyzed by means of the GaussSum program.<sup>[7]</sup> The transitions were convoluted by Gaussian curves with  $2000\text{ cm}^{-1}$  half line width.  $^1\text{H}$  and  $^{13}\text{C}$  NMR chemical shifts as well as nucleus-independent chemical shifts (NICS(-1,0,1)) were calculated by means of GIAO/B3LYP/6-31G(d,p) procedure included in the Gaussian program.

## Syntheses and characterizations

**Synthesis of the precursors.** Starting norkorrolatonickel(II) complex **1-H** and its 3-nitro-derivative **1-NO<sub>2</sub>** were obtained as described previously.<sup>[8,9]</sup> Azomethine ylide (2-(*tert*-butyl)-8*H*-isoquinolino[4,3,2-*de*]phenanthridin-9-ium chloride, **IQPC** was synthesized by the literature method.<sup>[10]</sup>

### Synthesis of **2a** and **2b**

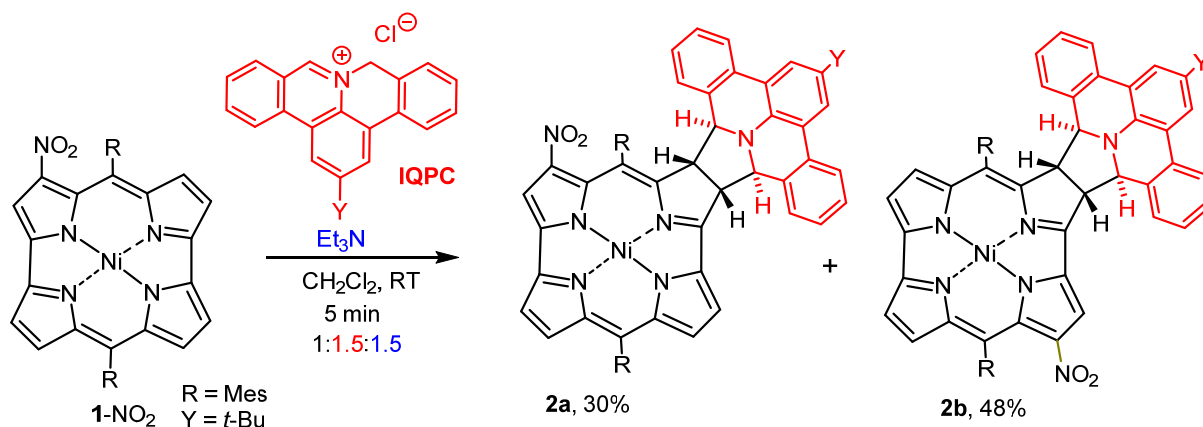

In a 25 mL round bottom flask the 3-nitro-norcorrolatonickel(II) (**1-NO<sub>2</sub>**, 31 mg, 0.05 mmol) and azomethine ylide (2-(*tert*-butyl)-8*H*-isoquinolino[4,3,2-*de*]phenanthridin-9-ium chloride, **IQPC**, 27 mg, 0.075 mmol) were dissolved in CH<sub>2</sub>Cl<sub>2</sub> (6 mL) and triethylamine (11  $\mu$ L, 0.075 mmol) was added in one shot. The reaction mixture was stirred at room temperature for several minutes until the complete consumption of **1-NO<sub>2</sub>**. The reaction mixture was then passed through a short silica gel column with CH<sub>2</sub>Cl<sub>2</sub> as eluent and all the movable fractions were collected together, then the solvent was evaporated under vacuum. The residue was purified by silica preparative thin layer plate (1 mm, 20 x 20 cm) with petroleum ether CH<sub>2</sub>Cl<sub>2</sub> (*v/v* = 1:1.5) as eluent to afford product **2a** and **2b**.

Selected data:

**2a**: yield 23 mg (48%). <sup>1</sup>H NMR (500 MHz, CDCl<sub>3</sub>, 298 K)  $\delta$ : 7.63 (d, <sup>3</sup>*J* = 7.5 Hz, 1H, 6'), 7.56 (d, <sup>4</sup>*J* = 2.0 Hz, 1H, 9'), 7.49 (d, <sup>4</sup>*J* = 2.0 Hz, 1H, 11'), 7.27 (d, <sup>3</sup>*J* = 7.9 Hz, 1H, 14'), 7.26 (td, <sup>3</sup>*J* = 7.6 Hz, <sup>4</sup>*J* = 1.0 Hz, 1H, 5'), 7.03 (td, <sup>3</sup>*J* = 7.6 Hz, <sup>4</sup>*J* = 1.2 Hz, 1H, 15'), 7.00 (td, <sup>3</sup>*J* = 7.6 Hz, <sup>4</sup>*J* = 1.0 Hz, 1H, 4'), 6.79 (dd, <sup>3</sup>*J* = 7.5 Hz, <sup>4</sup>*J* = 0.8 Hz, 1H, 3'), 6.71 (s, 1H, 14-*m*-Mes), 6.69 (td, <sup>3</sup>*J* = 7.5 Hz, <sup>4</sup>*J* = 1.0 Hz, 1H, 16'), 6.64 (s, 1H, 14-*m*-Mes), 6.50 (dd, <sup>3</sup>*J* = 7.6 Hz, <sup>4</sup>*J* = 0.8 Hz, 1H, 17'), 6.24 (s, 1H, 5-*m*-Mes), 6.11 (s, 1H, 5-*m*-Mes), 5.23 (s, 1H, 8-pyrr), 4.76 (d, <sup>3</sup>*J* = 4.9 Hz, 1H, 12-pyrr), 4.60 (d, <sup>3</sup>*J* = 4.9 Hz, 1H, 11-pyrr), 4.59 (d, <sup>3</sup>*J* = 4.0 Hz, 1H, 17-pyrr), 4.13 (d, <sup>3</sup>*J* = 4.0 Hz, 1H, 16-pyrr), 3.759 (d, <sup>3</sup>*J* = 8,6 Hz, 1H, 19'), 3.756 (d, <sup>3</sup>*J* = 8,2 Hz, 1H, 1'), 2.65 (t, <sup>3</sup>*J* = 8,2 Hz, 1H, 2), 2.61 (s, 3H, 14-*o*-Me), 2.43 (t, <sup>3</sup>*J* = 8,6 Hz, 1H, 3), 2.36 (s, 3H, 5-*o*-Me), 2.29 (s, 3H, 14-*o*-Me), 2.14 (s, 3H, 14-*p*-Me), 1.94 (s, 3H, 5-*o*-Me), 1.91 (s, 3H, 5-*p*-Me), 1.37 (s, 9H, 10'-*t*Bu). <sup>13</sup>C NMR (125 MHz, CDCl<sub>3</sub>, 298 K)  $\delta$ : 179.5, 171.5, 146.04, 145.6, 145.2, 144.5, 144.2,

144.0, 143.1, 140.2, 139.2, 138.2, 137.9, 136.1, 136.0, 135.64, 135.59, 134.9, 133.8, 130.9, 130.6, 130.1, 129.7, 129.3, 129.03, 128.95, 128.5, 128.3, 128.3, 127.57, 127.54, 127.1, 126.9, 126.8, 126.2, 122.8, 122.0, 121.4, 120.7, 120.5, 120.3, 120.0, 116.8, 64.4, 63.8, 59.1, 54.4, 34.4, 31.4, 20.88, 20.86, 20.0, 19.9, 19.7, 19.0. UV-vis (CH<sub>2</sub>Cl<sub>2</sub>) λ<sub>max</sub>/nm (logε): 272 (4.71), 295 (4.60), 346 (4.50), 432 (4.46), 485 (4.27). ESI-HRMS calc. for C<sub>60</sub>H<sub>49</sub>N<sub>6</sub>NiO<sub>2</sub><sup>+</sup> [M-H]<sup>+</sup>: 943.3265, Found: 943.3270.

**2b**: yield 14 mg (30%). <sup>1</sup>H NMR (500 MHz, CDCl<sub>3</sub>, 298 K) δ: 7.62 (d, <sup>3</sup>J = 8.0 Hz, 1H, 6'), 7.57 (s, 1H, 9'), 7.53 (s, 1H, 11'), 7.36 (d, <sup>3</sup>J = 8.0 Hz, 1H, 14'), 7.26 (t, <sup>3</sup>J = 7.7 Hz, 1H, 5'), 7.07 (t, <sup>3</sup>J = 7.5 Hz, 1H, 4'), 6.97 (t, <sup>3</sup>J = 7.7 Hz, 1H, 15'), 6.91 (d, <sup>3</sup>J = 7.7 Hz, 1H, 3'), 6.598 (s, 1H, 14-*m*-Mes), 6.592 (s, 1H, 14-*m*-Mes), 6.54 (s, 1H, 5-*m*-Mes), 6.51 (t, <sup>3</sup>J = 7.5 Hz, 1H, 16'), 6.28 (s, 1H, 5-*m*-Mes), 6.15 (d, <sup>3</sup>J = 7.7 Hz, 1H, 17'), 4.93 (s, 1H, 17-pyrr), 4.64 (d, <sup>3</sup>J = 5.0 Hz, 1H, 11-pyrr), 4.63 (d, <sup>3</sup>J = 4.0 Hz, 1H, 8-pyrr), 4.60 (d, <sup>3</sup>J = 5.0 Hz, 1H, 12-pyrr), 3.77 (d, <sup>3</sup>J = 8.0 Hz, 1H, 1'), 3.74 (d, <sup>3</sup>J = 8.0 Hz, 1H, 19'), 3.63 (d, <sup>3</sup>J = 4.0 Hz, 1H, 7-pyrr), 2.63 (s, 3H, 14-*o*-Me), 2.57 (t, <sup>3</sup>J = 8.0 Hz, 1H, 2), 2.45 (t, <sup>3</sup>J = 8.0 Hz, 1H, 3), 2.38 (s, 3H, 5-*o*-Me), 2.25 (s, 3H, 14-*o*-Me), 2.19 (s, 3H, 5-*o*-Me), 2.10 (s, 3H, 14-*p*-Me), 2.02 (s, 3H, 5-*p*-Me), 1.34 (s, 9H, 10'-*t*Bu). <sup>13</sup>C NMR (125 MHz, CDCl<sub>3</sub>, 298 K) δ: 177.4, 172.2, 151.0, 149.1, 144.0, 141.6, 141.1, 140.6, 140.1, 139.8, 137.1, 136.9, 136.0, 135.8, 135.4, 134.8, 134.3, 130.4, 130.05, 130.03, 129.5, 129.4, 129.3, 129.2, 128.4, 128.0, 127.61, 127.55, 127.4, 127.09, 127.05, 126.9, 123.3, 122.7, 122.1, 122.0, 121.9, 121.4, 120.4, 120.2, 118.3, 117.3, 65.8, 64.8, 59.0, 54.8, 34.4, 31.4, 21.0, 20.7, 19.8, 19.7, 19.6, 19.5. UV-vis (CH<sub>2</sub>Cl<sub>2</sub>) λ<sub>max</sub>/nm (logε): 270 (4.62), 295 (4.53), 341 (4.44), 432 (4.27), 485 (4.22). ESI-HRMS calc. for C<sub>60</sub>H<sub>49</sub>N<sub>6</sub>NiO<sub>2</sub><sup>+</sup> [M-H]<sup>+</sup>: 943.3265, Found: 943.3274.

## Synthesis of **3-uddu**, **3-udud**, and **3-uduu**

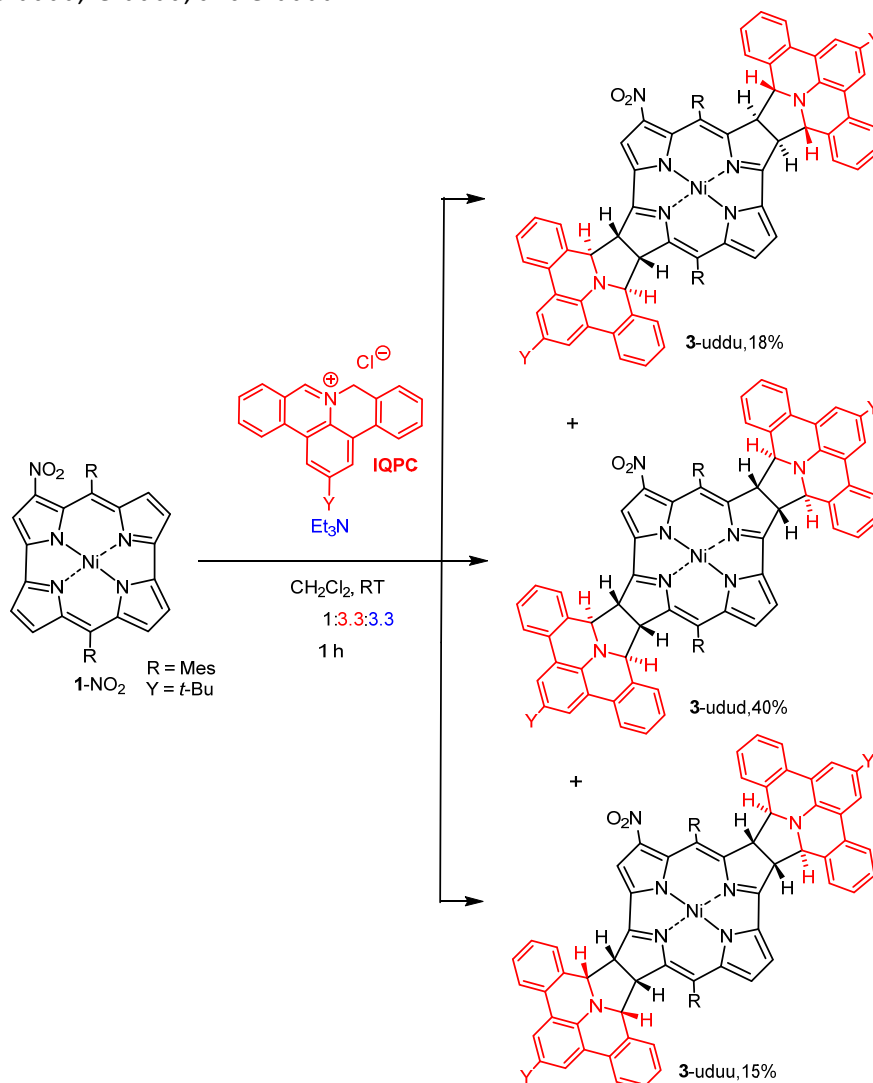

In a 25 mL round bottom flask, **1-NO<sub>2</sub>** (31 mg, 0.05 mmol) and azomethine ylide **IQPC** (59 mg, 0.165 mmol) were dissolved in  $\text{CH}_2\text{Cl}_2$  (10 mL) and triethylamine (23  $\mu\text{L}$ , 0.165 mmol) was added in one shot. The reaction mixture was stirred at room temperature for one hour. Then, the reaction mixture was passed through a short silica gel column with  $\text{CH}_2\text{Cl}_2$  as eluent and all the movable fractions were collected together, and then the solvent was evaporated under vacuum. The residue was subjected to separation on a silica preparative thin layer plate (1 mm, 20 x 20 cm) with petroleum ether/ $\text{CH}_2\text{Cl}_2$  (*v/v* = 1:1.5) as eluent to afford stereomeric products **3-uddu**, **3-udud**, and **3-uduu**.

Selected data:

**3-uddu**: yield 11 mg (18%).  $^1\text{H}$  NMR (500 MHz,  $\text{CDCl}_3$ , 298 K)  $\delta$ : 7.692 (d,  $^3J = 7.9$  Hz, 1H, 6'), 7.685 (d,  $^3J = 7.9$  Hz, 1H, 6''), 7.64 (s, 3H, 9' + 9'' + 11''), 7.59 (s, 1H, 11'), 7.51 (d,  $^3J = 8.0$  Hz, 1H, 14''), 7.36 (m, 2H, 14' + 5''), 7.33 (t,  $^3J = 7.2$  Hz, 1H, 5'), 7.24 (m, 1H, 3''), 7.20 (t,  $^3J = 7.2$  Hz, 1H, 4''), 7.12 (d,  $^3J = 7.2$

Hz, 1H, 3'), 7.08 (m, 3H, 4', 15', 15''), 6.86 (s, 1H, 5-*m*-Mes), 6.67 (t,  $^3J = 7.5$  Hz, 1H, 16'), 6.62 (s, 1H, 5-*m*-Mes), 6.50 (d,  $^3J = 7.5$  Hz, 1H, 16''), 6.43 (s, 1H, 14-*m*-Mes), 6.31 (s, 1H, 14-*m*-Mes), 6.28 (d,  $^3J = 7.5$  Hz, 1H, 17'), 5.65 (s, 1H, 8-pyrr), 5.45 (d,  $^3J = 7.5$  Hz, 1H, 17''), 5.44 (d,  $^3J = 4.0$  Hz, 1H, 17-pyrr), 4.49 (d,  $^3J = 4.0$  Hz, 1H, 16-pyrr), 4.11 (d,  $^3J = 6.7$  Hz, 1H, 19''), 4.09 (d,  $^3J = 7.8$  Hz, 1H, 1''), 4.07 (d,  $^3J = 7.7$  Hz, 1H, 1'), 3.99 (d,  $^3J = 8.3$  Hz, 1H, 19'), 3.30 (t,  $^3J = 8.3$  Hz, 2H, 2 + 11), 3.25 (d,  $^3J = 6.7$  Hz, 1H, 12), 3.15 (t,  $^3J = 8.3$  Hz, 1H, 3), 2.46 (s, 3H, 14-*o*-Me), 2.28 (s, 3H, 5-*o*-Me), 2.27 (s, 3H, 14-*p*-Me), 2.09 (s, 3H, 14-*o*-Me), 2.05 (s, 3H, 5-*p*-Me), 1.99 (s, 3H, 5-*o*-Me), 1.38 (s, 9H, 10'-*t*Bu), 1.39 (s, 9H, 10''-*t*Bu).  $^{13}\text{C}$  NMR (125 MHz,  $\text{CDCl}_3$ , 298 K)  $\delta$ : 176.4, 176.2, 148.8, 146.7, 144.0, 143.1, 142.4, 139.4, 137.8, 137.4, 137.3, 136.7, 136.5, 136.0, 135.8, 135.6, 134.9, 131.3, 131.0, 130.51, 130.47, 130.3, 129.72, 129.67, 129.6, 129.3, 129.2, 129.1, 128.5, 127.7, 127.5, 127.34, 127.32, 127.25, 126.9, 126.8, 126.7, 124.1, 124.0, 123.1, 122.8, 122.4, 122.2, 122.1, 121.9, 121.8, 121.1, 120.8, 120.3, 120.2, 120.1, 118.8, 116.9, 66.9, 66.3, 65.5, 65.0, 58.3, 58.1, 56.7, 34.5, 31.49, 31.45, 21.1, 20.39, 20.35, 20.1, 19.5. UV-vis ( $\text{CH}_2\text{Cl}_2$ )  $\lambda_{\text{max}}/\text{nm}$  ( $\log\epsilon$ ): 273 (4.81), 295 (sh), 353 (4.56), 432 (4.38), 489 (4.17), 609(sh). ESI-HRMS calc. for  $\text{C}_{84}\text{H}_{71}\text{N}_7\text{NiO}_2\text{Na}^+$   $[\text{M}+\text{Na}]^+$ : 1290.4915, Found: 1290.4919.

**3-udud**: yield 25 mg (40%).  $^1\text{H}$  NMR (500 MHz,  $\text{CDCl}_3$ , 298 K)  $\delta$ : 7.77 (d,  $^3J = 8.0$  Hz, 1H, 6''), 7.74 (d,  $^3J = 8.0$  Hz, 1H, 6'), 7.71 (d,  $^4J = 2.0$  Hz, 1H, 9''), 7.65 (d,  $^4J = 2.0$  Hz, 1H, 9'), 7.57 (d,  $^4J = 2.0$  Hz, 1H, 11''), 7.50 (d,  $^4J = 2.0$  Hz, 1H, 11'), 7.41 (d,  $^3J = 8.0$  Hz, 1H, 14''), 7.36 (td,  $^3J = 7.5$  Hz,  $^4J = 1.0$  Hz, 1H, 5''), 7.34 (td,  $^3J = 8.0$  Hz,  $^4J = 1.0$  Hz, 1H, 5'), 7.30 (d,  $^3J = 8.0$  Hz, 1H, 14'), 7.243 (t,  $^3J = 7.5$  Hz, 1H, 4''), 7.15 (m, 2H, 4' + 3''), 7.10 (m, 2H, 15' + 3'), 7.06 (t,  $^3J = 7.7$  Hz, 1H, 15''), 6.96 (d,  $^3J = 7.6$  Hz, 1H, 17''), 6.82 (m, 2H, 16' + 17'), 6.78 (t,  $^3J = 7.6$  Hz, 1H, 16''), 6.52 (s, 1H, 14-*m*-Mes), 6.38 (s, 1H, 14-*m*-Mes), 6.22 (s, 1H, 5-*m*-Mes), 6.14 (s, 1H, 5-*m*-Mes), 6.13 (s, 1H, 8-pyrr), 5.68 (d,  $^3J = 4.0$  Hz, 1H, 17-pyrr), 4.67 (d,  $^3J = 4.0$  Hz, 1H, 16-pyrr), 4.58 (m, 1H, 19''), 4.34 (d,  $^3J = 8.0$  Hz, 1H, 1''), 4.19 (d,  $^3J = 7.8$  Hz, 1H, 1'), 4.14 (m, 1H, 19'), 3.29 (t,  $^3J = 8.0$  Hz, 1H, 11), 3.25 (t,  $^3J = 7.8$  Hz, 1H, 2), 3.02 (t,  $^3J = 8.5$  Hz, 1H, 12), 2.97 (t,  $^3J = 8.5$  Hz, 1H, 3), 2.27 (s, 3H, 14-*o*-Me), 2.05 (s, 3H, 14-*p*-Me), 2.04 (s, 3H, 5-*o*-Me), 2.02 (s, 3H, 14-*o*-Me), 1.95 (s, 3H, 5-*p*-Me), 1.91 (s, 3H, 5-*o*-Me), 1.38 (s, 9H, *t*Bu), 1.37 (s, 9H, *t*Bu).  $^{13}\text{C}$  NMR (125 MHz,  $\text{CDCl}_3$ , 298 K)  $\delta$ : 174.6, 149.1, 145.7, 143.8, 143.2, 140.4, 139.0, 137.4, 137.0, 136.7, 136.6, 136.1, 135.7, 135.5, 134.8, 134.2, 131.9, 131.1, 131.0, 130.8, 130.7, 130.4, 130.3, 129.8, 129.6, 129.3, 129.1, 128.9, 128.6, 128.0, 127.7, 127.6, 127.53, 127.48, 127.3, 127.2, 127.0, 124.3, 124.1, 122.80, 122.75, 122.1, 122.3, 121.97, 121.6, 121.5, 121.4, 120.5, 120.4, 120.3, 119.9, 118.9, 117.1, 67.4, 67.2, 65.4, 64.6, 59.7, 58.7, 55.0, 54.5, 34.5, 34.4, 31.47, 31.44, 21.0, 20.91, 20.86, 20.7, 20.4, 19.7. UV-vis ( $\text{CH}_2\text{Cl}_2$ )  $\lambda_{\text{max}}/\text{nm}$  ( $\log\epsilon$ ): 273 (4.86), 295 (sh), 352 (4.63), 429 (4.35), 484 (sh). ESI-HRMS calc. for  $\text{C}_{84}\text{H}_{70}\text{N}_7\text{NiO}_2^+$   $[\text{M}-\text{H}]^+$ : 1266.4939, Found: 1266.4957.

**3-uduu**: yield 9 mg (15%).  $^1\text{H}$  NMR (500 MHz,  $\text{CDCl}_3$ , 298 K)  $\delta$ : 8.43 (s, 1H, 11''), 7.96 (s, 1H, 9''), 7.85 (d,  $^3J = 7.8$  Hz, 1H, 14''), 7.69 (d,  $^3J = 8.0$  Hz, 1H, 6'), 7.65 (d,  $^3J = 7.8$  Hz, 1H, 6''), 7.59 (s, 1H, 9'), 7.49 (s,

1H, 11'), 7.43 (t,  $^3J = 7.6$  Hz, 1H, 15''), 7.31 (m, 3H, 5' + 14' + 5''), 7.23 (t,  $^3J = 7.6$  Hz, 1H, 4''), 7.12 (m, 3H, 15' + 3'' + 4'), 7.04 (d,  $^3J = 7.8$  Hz, 1H, 3'), 7.02 (t,  $^3J = 7.5$  Hz, 1H, 16''), 6.91 (t,  $^3J = 7.5$  Hz, 16'), 6.78 (s, 1H, 14-*m*-Mes), 6.77 (d, 1H, 17'), 6.50 (s, 1H, 14-*m*-Mes), 6.21 (d,  $^3J = 7.8$  Hz, 1H, 17''), 6.17 (s, 2H, 5-*m*-Mes), 5.53 (d,  $^3J = 4.0$  Hz, 1H, 17-pyrr), 4.68 (s, 1H, 8-pyrr), 4.55 (d,  $^3J = 4.0$  Hz, 1H, 16-pyrr), 4.27 (d,  $^3J = 6.5$  Hz, 1H, 1''), 4.18 (d,  $^3J = 8.2$  Hz, 1H, 19''), 3.97 (d,  $^3J = 7.7$  Hz, 1H, 1'), 3.72 (d,  $^3J = 9.0$  Hz, 1H, 19'), 3.37 (t,  $^3J = 6.5$  Hz, 1H, 11), 3.19 (t,  $^3J = 7.8$  Hz, 1H, 12), 3.12 (t,  $^3J = 7.8$  Hz, 1H, 2), 2.86 (t,  $^3J = 8.7$  Hz, 1H, 3), 2.25 (s, 15H, 14-*o*-Me + 14-*p*-Me + 10''-*t*Bu), 2.15 (s, 3H, 5-*o*-Me), 1.95 (s, 3H, 5-*p*-Me), 1.76 (s, 3H, 5-*o*-Me), 1.35 (s, 9H, 10'-*t*Bu), 1.11 (s, 3H, 14-*o*-Me).  $^{13}\text{C}$  NMR (125 MHz,  $\text{CDCl}_3$ , 298 K)  $\delta$ : 174.4, 174.1, 148.1, 145.5, 144.4, 143.8, 142.1, 141.2, 139.8, 138.7, 138.0, 137.1, 136.7, 136.4, 136.1, 135.3, 135.2, 134.7, 134.6, 133.1, 132.6, 131.7, 131.3, 130.5, 130.4, 130.1, 129.8, 129.7, 129.4, 129.0, 128.8, 128.6, 128.3, 128.2, 128.1, 127.8, 127.6, 127.5, 127.4, 127.2, 127.2, 127.1, 126.6, 123.9, 123.7, 123.3, 122.77, 122.76, 122.72, 122.6, 122.15, 122.08, 121.7, 121.4, 120.4, 120.0, 119.0, 118.5, 116.4, 67.5, 67.1, 64.7, 63.8, 58.8, 58.6, 54.7, 50.7, 35.5, 34.4, 32.6, 31.4, 21.0, 20.9, 20.2, 19.9, 19.5. UV-vis ( $\text{CH}_2\text{Cl}_2$ )  $\lambda_{\text{max}}/\text{nm}$  ( $\log\epsilon$ ): 273 (4.83), 295 (4.60), 354 (4.54), 432 (4.31), 482 (4.16). ESI-HRMS calc. for  $\text{C}_{84}\text{H}_{71}\text{N}_7\text{NiO}_2\text{Na}^+$  [ $\text{M}+\text{Na}$ ] $^+$ : 1290.4915, Found: 1290.4896.

## Synthesis of 4

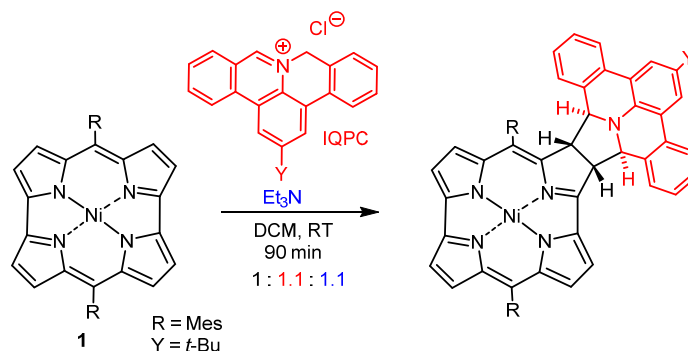

In a 25 mL round bottom flask the norcorrolatonickel(II) (**1**, 31 mg, 0.05 mmol) and azomethine ylide (2-(*tert*-butyl)-8*H*-isoquinolino[4,3,2-*de*]phenanthridin-9-ium chloride, **IQPC**, 20 mg, 0.055 mmol) were dissolved in CH<sub>2</sub>Cl<sub>2</sub> (6 mL) and triethylamine (8 μL, 0.055 mmol) was added in one shot. The reaction mixture was stirred at room temperature for 90 minutes. The reaction mixture was then passed through a short silica gel column with CH<sub>2</sub>Cl<sub>2</sub> as eluent and all the movable fractions were collected together, then the solvent was evaporated under vacuum. The residue was purified by silica preparative thin layer plate (1 mm, 20 x 20 cm) with petroleum ether CH<sub>2</sub>Cl<sub>2</sub> (*v/v* = 1:1.5) as eluent to afford product **4**.

Selected data:

**4**: yield 22 mg (50%). <sup>1</sup>H NMR (600 MHz, CDCl<sub>3</sub>, 298 K) δ: 7.53 (d, <sup>3</sup>*J* = 7.8 Hz, 1H, 6'), 7.48 (d, <sup>4</sup>*J* = 1.5 Hz, 1H, 9'), 7.44 (d, <sup>4</sup>*J* = 1.5 Hz, 1H, 11'), 7.25 (m, 1H, 14'), 7.14 (td, <sup>3</sup>*J* = 7.8 Hz, <sup>4</sup>*J* = 1.2 Hz, 1H, 5'), 6.89 (td, <sup>3</sup>*J* = 7.8 Hz, <sup>4</sup>*J* = 1.2 Hz, 1H, 15'), 6.86 (td, <sup>3</sup>*J* = 7.5 Hz, <sup>4</sup>*J* = 1.0 Hz, 1H, 4'), 6.61 (m, 1H, 3'), 6.60 (s, 1H, 14-*m*-Mes), 6.47 (m, 2H, 16' + 14-*m*-Mes), 6.33 (s, 1H, 5-*m*-Mes), 6.19 (s, 1H, 5-*m*-Mes), 6.15 (d, <sup>3</sup>*J* = 7.8 Hz, 1H, 17'), 3.81 (d, <sup>3</sup>*J* = 4.9 Hz, 1H, 12-pyrr), 3.77 (d, <sup>3</sup>*J* = 3.9 Hz, 1H, 8-pyrr), 3.72 (d, <sup>3</sup>*J* = 4.9 Hz, 1H, 11-pyrr), 3.67 (d, <sup>3</sup>*J* = 3.9 Hz, 1H, 17-pyrr), 3.36 (d, <sup>3</sup>*J* = 8.4 Hz, 1H, 19'), 3.34 (d, <sup>3</sup>*J* = 8.4 Hz, 1H, 1'), 3.15 (d, <sup>3</sup>*J* = 3.9 Hz, 1H, 16-pyrr), 2.93 (s, 3H, 14-*o*-Me), 2.81 (d, <sup>3</sup>*J* = 3.9 Hz, 1H, 7-pyrr), 2.39 (s, 3H, 5-*o*-Me), 2.28 (s, 3H, 5-*o*-Me), 2.21 (s, 3H, 14-*o*-Me), 2.03 (s, 3H, 14-*p*-Me), 1.98 (t, <sup>3</sup>*J* = 8.5 Hz, 1H, 2), 1.91 (s, 3H, 5-*p*-Me), 1.79 (t, <sup>3</sup>*J* = 8.5 Hz, 1H, 3), 1.31 (s, 9H, 10'-*t*Bu). <sup>13</sup>C NMR (125 MHz, CDCl<sub>3</sub>, 298 K) δ: 175.7, 173.3, 150.2, 147.8, 147.0, 146.0, 143.4, 141.8, 140.9, 139.2, 138.3, 137.0, 136.09, 136.07, 135.7, 135.4, 134.8, 134.3, 130.8, 130.3, 129.6, 129.11, 129.06, 128.7, 128.4, 128.1, 128.0, 127.2, 127.0, 126.94, 126.85, 126.7, 126.6, 122.3, 121.9, 121.6, 121.3, 121.2, 120.1, 120.0, 119.5, 119.1, 117.6, 116.1, 65.2, 63.8, 57.6, 53.3, 34.4, 31.4, 20.8, 20.6, 19.54, 19.45. UV-vis (CH<sub>2</sub>Cl<sub>2</sub>) λ<sub>max</sub>/nm (log $\epsilon$ ): 269 (4.53), 293 (sh), 317 (4.34), 342 (sh), 389 (4.31), 428 (4.36), 464 (sh), 518 (3.82), 553 (sh), 613 (3.34), 646 (sh), 681 (sh), 811 (3.15). ESI-HRMS calc. for C<sub>60</sub>H<sub>51</sub>N<sub>5</sub>NiNa<sup>+</sup> [M+Na]<sup>+</sup>: 922.3390, Found: 922.3409.

Due to retro-cycloaddition reaction, the spectra indicate the presence of starting norcorrole **1** in the amount up to 20% appearing shortly after dissolving an analytically (TLC) pure sample.



## Synthesis of 5-uduu and 5-udud

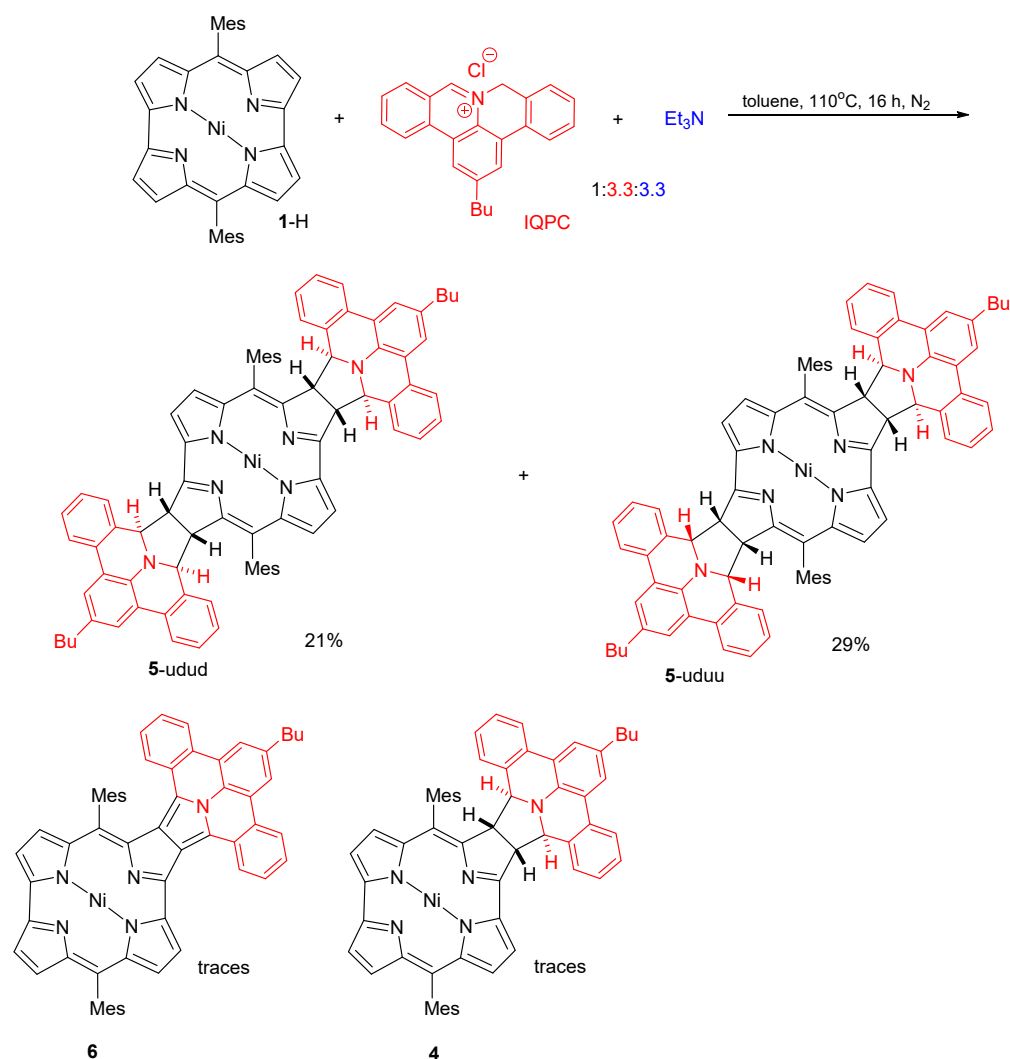

In a 50 mL round bottom flask the norcorrole **1-H** (87 mg, 0.15 mmol) and azomethine ylide (177 mg, 0.50 mmol) were dissolved in toluene (30 mL) and triethylamine (69  $\mu$ L, 0.50 mmol) was added in one shot. The reaction was stirred at 110°C for 16 h under the blank of N<sub>2</sub>. After that, the reaction mixture was passed through a short silica gel column with CH<sub>2</sub>Cl<sub>2</sub>:MeOH (99:1 v/v) as eluent and all the movable fraction was collected together, then the solvent was evaporated under vacuum. The components of the residue were separated by silica preparative thin layer plate (1 mm, 20 x 20 cm) with petroleum ether/CH<sub>2</sub>Cl<sub>2</sub> (v/v = 1.5:1) as eluent to afford product **5-uduu**, **5-udud**, and traces of **4** and **6** in an order: first yellow band, norcorrole **1-H**; second purple band, **6**; third green band, **4**; fourth yellow band, **5-uduu**; fifth brown band, **5-udud**.

Selected data:

**5-uduu**: yield (53 mg) 29%. <sup>1</sup>H NMR (500 MHz, CDCl<sub>3</sub>, 298 K)  $\delta$ : 8.66 (d, <sup>4</sup>J = 2.0 Hz, 1H, 11''), 7.97 (d, <sup>4</sup>J = 2.0 Hz, 1H, 9''), 7.95 (d, <sup>3</sup>J = 7.8 Hz, 1H, 14''), 7.64 (d, <sup>3</sup>J = 7.8 Hz, 1H, 6'), 7.58 (d, <sup>3</sup>J = 8.0 Hz, 1H, 6''), 7.56 (d, <sup>4</sup>J = 2.0 Hz, 1H, 9'), 7.49 (d, <sup>4</sup>J = 2.0 Hz, 1H, 11'), 7.42 (td, <sup>3</sup>J = 7.5 Hz, <sup>4</sup>J = 1.0 Hz, 1H, 15''), 7.33

(d,  $^3J = 7.5$  Hz, 1H, 14'), 7.24 (m, 1H, 5'), 7.15 (td,  $^3J = 7.5$ ,  $^4J = 1.0$  Hz, 1H, 5''), 7.07 (td,  $^3J = 7.5$  Hz,  $^4J = 1.0$  Hz, 1H, 4''), 7.02 (m, 3H, 3'' + 4' + 15'), 6.95 (m, 2H, 3' + 16''), 6.73 (s, 1H, 14-*m*-Mes), 6.70 (td,  $^3J = 7.5$  Hz,  $^4J = 1.0$  Hz, 1H, 16'), 6.57 (d,  $^3J = 7.5$  Hz, 1H, 17'), 6.45 (s, 1H, 14-*m*-Mes), 6.42 (s, 1H, 5-*m*-Mes), 6.23 (s, 1H, 5-*m*-Mes), 6.11 (d,  $^3J = 7.0$  Hz, 1H, 17''), 5.08 (d,  $^3J = 3.9$  Hz, 1H, 17-pyrr), 4.12 (d,  $^3J = 3.9$  Hz, 1H, 16-pyrr), 4.07 (d,  $^3J = 6.3$  Hz, 1H, 1''), 4.04 (d,  $^3J = 8.5$  Hz, 1H, 19''), 3.78 (d,  $^3J = 8.5$  Hz, 1H, 1'), 3.77 (d,  $^3J = 3.9$  Hz, 1H, 7-pyrr), 3.67 (d,  $^3J = 3.9$  Hz, 1H, 8-pyrr), 3.64 (d,  $^3J = 8.5$  Hz, 1H, 19'), 3.09 (t,  $^3J = 6.3$  Hz, 1H, 11), 2.85 (dd,  $^3J = 8.5$ , 6.5 Hz, 1H, 12), 2.80 (t,  $J = 8.3$  Hz, 1H, 2), 2.52 (t,  $^3J = 8.3$  Hz, 1H, 3), 2.40 (s, 9H, 10''-*t*Bu), 2.38 (s, 3H, 14-*o*-Me), 2.23 (s, 3H, 5-*o*-Me), 2.21 (s, 3H, 14-*p*-Me), 1.98 (s, 3H, 5-*p*-Me), 1.91 (s, 3H, 5-*o*-Me), 1.33 (s, 9H, 10'-*t*Bu), 1.07 (s, 3H, 14-*o*-Me).  $^{13}\text{C}$  NMR (125 MHz,  $\text{CDCl}_3$ , 298 K)  $\delta$ : 171.7, 170.6, 147.9, 145.2, 143.2, 143.1, 139.9, 139.7, 139.1, 138.8, 137.4, 136.6, 136.4, 136.0, 135.7, 135.1, 134.4, 133.6, 132.9, 131.7, 131.3, 130.9, 130.39, 130.36, 130.2, 129.6, 129.4, 128.9, 128.7, 128.6, 128.4, 128.0, 127.8, 127.7, 127.6, 127.5, 127.2, 126.9, 126.8, 126.6, 126.5, 123.2, 122.7, 122.4, 122.0, 121.7, 121.3, 120.5, 120.1, 119.6, 115.0, 114.2, 66.9, 65.0, 64.3, 63.4, 57.7, 57.0, 54.2, 50.8, 35.6, 34.4, 32.7, 31.5, 29.7, 21.0, 20.7, 20.5, 20.1, 19.6, 19.3. UV-vis ( $\text{CH}_2\text{Cl}_2$ )  $\lambda_{\text{max}}/\text{nm}$  ( $\log\epsilon$ ): 274 (4.71), 295 (4.49), 347 (4.44), 381 (4.42), 401 (4.41), 519 (3.60). ESI-HRMS calc. for  $\text{C}_{84}\text{H}_{72}\text{N}_6\text{Ni}^+ [\text{M}]^+$ : 1222.5166, Found: 1222.5127 and for  $\text{C}_{84}\text{H}_{73}\text{N}_6\text{Ni}^+ [\text{M}+\text{H}]^+$ : 1223.5245, Found: 1223.5165.

**5-udud**: yield 38 mg (21%).  $^1\text{H}$  NMR (500 MHz,  $\text{CDCl}_3$ , 298 K)  $\delta$ : 7.68 (d,  $^3J = 8.0$  Hz, 2H, 6' + 6''), 7.71 (d,  $^4J = 2.0$  Hz, 2H, 9' + 9''), 7.53 (d,  $^4J = 2.0$  Hz, 2H, 11' + 11''), 7.36 (d,  $^3J = 8.0$  Hz, 2H, 14' + 14''), 7.28 (td,  $^3J = 7.5$  Hz,  $^4J = 1.5$  Hz, 2H, 5' + 5''), 7.08 (td,  $^3J = 7.2$  Hz,  $^4J = 0.8$  Hz, 2H, 4' + 4''), 7.04 (dd,  $^3J = 7.8$  Hz,  $^4J = 1.3$  Hz, 2H, 3' + 3''), 7.01 (td,  $^3J = 7.6$  Hz,  $^4J = 1.3$  Hz, 2H, 15' + 15''), 6.70 (td,  $^3J = 7.5$  Hz,  $^4J = 0.9$  Hz, 2H, 16' + 16''), 6.64 (d,  $^3J = 7.5$  Hz, 2H, 17' + 17''), 6.49 (s, 2H, 14-*m*-Mes), 6.30 (s, 2H, 5-*m*-Mes), 5.17 (d,  $^3J = 4.0$  Hz, 2H, 8,17-pyrr), 4.20 (d,  $^3J = 4.0$  Hz, 2H, 7,16-pyrr), 3.99 (d,  $^3J = 7.4$  Hz, 2H, 1' + 1''), 3.97 (d,  $^3J = 8.8$  Hz, 2H, 19' + 19''), 2.94 (t,  $^3J = 8.4$  Hz, 2H, 2 + 11), 2.68 (t,  $^3J = 8.5$  Hz, 2H, 3 + 12), 2.32 (s, 6H, 14-*o*-Me), 2.06 (s, 6H, 5-*o*-Me), 2.01 (s, 6H, 5-*p*-Me + 14-*p*-Me), 1.35 (s, 18H, 10'-*t*Bu).  $^{13}\text{C}$  NMR (150 MHz,  $\text{CDCl}_3$ , 298 K)  $\delta$ : 171.4, 150.6, 143.3, 141.5, 137.6, 136.9, 136.5, 136.0, 134.6, 131.7, 131.2, 130.9, 130.5, 129.4, 129.1, 128.7, 127.8, 127.5, 127.4, 127.2, 126.9, 126.8, 124.0, 122.4, 122.1, 121.7, 121.3, 120.2, 119.9, 115.8, 66.7, 65.2, 57.7, 54.6, 34.4, 31.5, 20.7, 20.6, 19.8. UV-vis ( $\text{CH}_2\text{Cl}_2$ )  $\lambda_{\text{max}}/\text{nm}$  ( $\log\epsilon$ ): 274 (4.81), 295 (4.63), 355 (4.57), 378 (4.61), 395 (4.59), 519 (3.64). ESI-HRMS calc. for  $\text{C}_{84}\text{H}_{72}\text{N}_6\text{Ni}^+ [\text{M}]^+$ : 1222.5166, Found: 1222.5205 and for  $\text{C}_{84}\text{H}_{73}\text{N}_6\text{Ni}^+ [\text{M}+\text{H}]^+$ : 1223.5245, Found: 1223.5254.

## Synthesis of 6

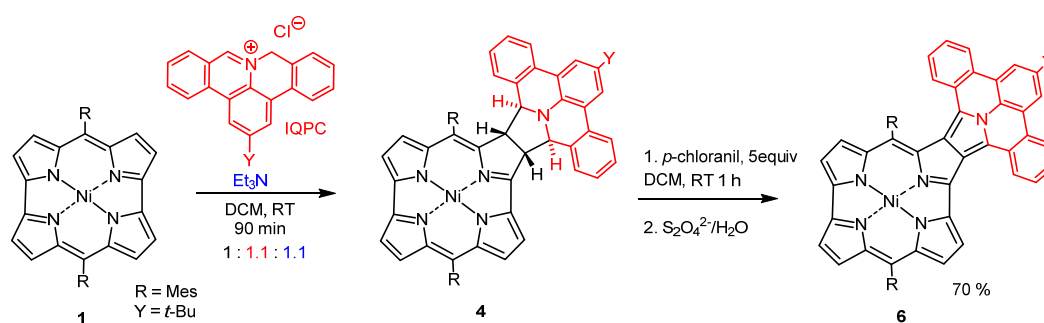

In a 25 mL round bottom flask the norcorrolatonickel(II) (**1**, 31 mg, 0.05 mmol) and azomethine ylide (2-(*tert*-butyl)-8*H*-isoquinolino[4,3,2-*de*]phenanthridin-9-ium chloride, **IQPC** 20 mg, 0.055 mmol) were dissolved in  $\text{CH}_2\text{Cl}_2$  (6 mL) and triethylamine (8  $\mu\text{L}$ , 0.055 mmol) was added in one shot. The reaction mixture was stirred at room temperature for 90 minutes. After that time, *p*-chloranil (63 mg, 0.25 mmol) was added and the stirring was continued for one hour. Then, 50 mg of zinc and 5 mL of saturated aqueous  $\text{Na}_2\text{S}_2\text{O}_4$  solution were added and allowed to contact with the organic layer for about 20 minutes by vigorous stirring. Water layer was then removed by pipette and organic layer was washed by several 5-mL-portions of water. The organic layer was separated, dried with anhydrous sodium sulfate and filtered with a cotton pad. The components of the filtrate was separated by silica preparative thin layer plate (1 mm, 20 x 20 cm) with hexane/ $\text{CH}_2\text{Cl}_2$  ( $v/v = 1.5:1$ ) as eluent to afford product **6**.

Selected data:

**6**: yield 31 mg (70%)  $^1\text{H}$  NMR (500MHz,  $\text{CDCl}_3$ , 298 K)  $\delta$ : 7.95 (d,  $^3J = 7.8$  Hz, 1H, 6'), 7.94 (s, 1H, 9'), 7.90 (d,  $^4J = 1.5$  Hz, 1H, 11'), 7.71 (d,  $^3J = 7.5$  Hz, 1H, 14'), 7.26 (t,  $^3J = 7.5$  Hz, 1H, 5'), 6.97 (m, 2H, 15' + 4'), 6.48 (s, 2H, 14-*m*-Mes), 6.315 (s, 2H, 5-*m*-Mes), 6.30 (m, 2H, 16' + 3'), 5.38 (d,  $^3J = 8.0$  Hz, 1H, 17'), 3.70 (d,  $^3J = 4.0$  Hz, 1 H, 17-pyrr), 3.30 (d,  $^3J = 4.8$  Hz, 1 H, 12-pyrr), 3.14 (d,  $^3J = 4.8$  Hz, 1 H, 11-pyrr), 3.07 (d,  $^3J = 3.7$  Hz, 1 H, 8-pyrr), 2.83 (d,  $^3J = 4.0$  Hz, 1 H, 16-pyrr), 2.71 (s, 6H, 14-*o*-Me), 2.41 (s, 6H, 5-*o*-Me), 2.38 (d,  $^3J = 3.7$  Hz, 1 H, 7-pyrr), 1.99 (s, 3H, 14-*p*-Me), 1.90 (5-*p*-Me), 1.37 (s, 9H, 10'-*t*Bu).  $^{13}\text{C}$  NMR (150 MHz,  $\text{CDCl}_3$ , 298 K)  $\delta$ : 174.3, 166.9, 150.4, 148.9, 147.5, 146.8, 145.6, 137.8, 137.1, 136.8, 136.2, 131.1, 128.9, 128.0, 127.9, 127.6, 127.3, 126.2, 126.1, 126.0, 123.6, 123.3, 123.2, 122.9, 122.5, 122.1, 121.4, 121.1, 120.4, 119.9, 119.5, 118.7, 118.7, 118.3, 117.8, 117.0, 116.0, 37.1, 31.9, 31.5, 22.7, 20.73, 20.69, 19.1, 18.5, 14.1. UV-vis ( $\text{CH}_2\text{Cl}_2$ )  $\lambda_{\text{max}}/\text{nm}$  ( $\log\epsilon$ ): 255 (4.64), 285 (4.47), 320 (4.37), 354 (4.31), 432 (4.24), 490 (4.19), 520 (4.25), 621 (4.01), 661 (4.01). ESI-HRMS calc. for  $\text{C}_{60}\text{H}_{47}\text{N}_5\text{Ni}^+$   $[\text{M}]^+$ : 895.3179, Found: 895.3179.

## Synthesis of 7 and 8

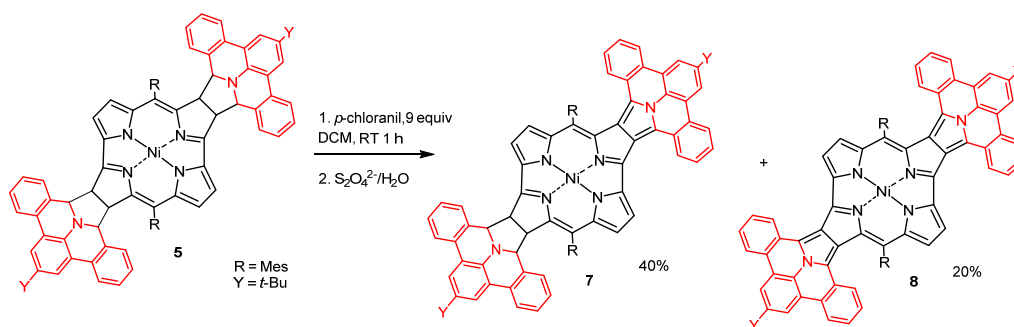

In a 25 mL round bottom flask a mixture of stereomers of **5** (40 mg, 0.033 mmol) and *p*-chloranil (75 mg, 0.300 mmol) were dissolved in 5 mL of dichloromethane. The reaction mixture was stirred at room temperature for 1 h. Then, 50 mg of zinc and 5 mL of saturated aqueous  $Na_2S_2O_4$  solution were added and allowed to contact with the organic layer for about 20 minutes by vigorous stirring. Water layer was then removed by pipette and organic layer was washed by several 5-mL-portions of water. The organic layer was separated, dried with anhydrous sodium sulfate and filtered with a cotton pad. The components of the filtrate was separated by silica preparative thin layer plate (1 mm, 20 x 20 cm) with hexane/ $CH_2Cl_2$  ( $v/v = 1.5:1$ ) as eluent giving rise to a blue-purple band containing product **7** and a green band of product **8**. The bands were then removed from the plate and extracted with dichloromethane, filtered by a cotton pad and crystallized with hexane.

Selected data:

**7**: yield 16 mg (40%).  $^1H$  NMR (500 MHz,  $CDCl_3$ , 298 K)  $\delta$ : 8,103 (d, 1H, 6''), 8,097 (s, 1H, 9''), 8,05 (d,  $^4J = 1,4$  Hz, 1H, 11''), 7,85 (d,  $^3J = 8.0$  Hz, 1H, 14''), 7,64 (d,  $^3J = 7.8$  Hz, 1H, 6'), 7,57 (d,  $^4J = 2.0$  Hz, 1H, 9'), 7,50 (d,  $^4J = 2.0$  Hz, 1H, 11'), 7,43 (d,  $^3J = 8.0$  Hz, 1H, 3''), 7,38 (d,  $^3J = 7.8$  Hz, 1H, 5''), 7,34 (d,  $^3J = 8.0$  Hz, 1H, 14'), 7,23 (m, 2H, 5' + 4''), 7,06 (td,  $^3J = 8.0$  Hz,  $^4J = 1.0$  Hz, 1H, 15''), 7,02 (t,  $^3J = 7.5$  Hz, 1H, 4'), 6,99 (t,  $^3J = 7.8$  Hz, 1H, 15'), 6,92 (d,  $^3J = 7.5$  Hz, 1H, 3'), 6,76 (s, 1H, 14-*m*-Mes), 6,66 (t,  $^3J = 7.5$  Hz, 1H, 16'), 6,51 (d,  $^3J = 7.5$  Hz, 1H, 17'), 6,48 (t,  $^3J = 7.5$  Hz, 1H, 16''), 6,47 (s, 1H, 5-*m*-Mes), 6,30 (s, 1H, 5-*m*-Mes), 6,24 (s, 1H, 14-*m*-Mes), 6,02 (d,  $^3J = 8.0$  Hz, 1H, 17''), 5,44 (d,  $^3J = 4.0$  Hz, 1H, 8-pyrr), 4,66 (d,  $^3J = 4.0$  Hz, 1H, 17-pyrr), 3,91 (d,  $^3J = 4.0$  Hz, 1H, 7-pyrr), 3,84 (d,  $^3J = 4.0$  Hz, 1H, 16-pyrr), 3,76 (d,  $^3J = 8.5$  Hz, 1H, 1'), 3,74 (d,  $^3J = 8.5$  Hz, 1H, 19'), 2,64 (t,  $^3J = 8.5$  Hz, 1H, 2), 2,380 (s, 3H, 5-*o*-Me), 2,377 (m, 1H, 3), 2,35 (s, 3H, 14-*o*-Me), 2,23 (s, 3H, 5-*o*-Me), 2,18 (s, 3H, 14-*o*-Me), 2,04 (s, 3H, 14-*p*-Me), 2,01 (s, 3H, 5-*p*-Me), 1,43 (s, 9H, 10''-*t*Bu), 1,35 (s, 9H, 10'-*t*Bu).  $^{13}C$  NMR (150 MHz,  $CDCl_3$ , 298 K)  $\delta$ : 172.6, 163.4, 149.8, 149.5, 147.3, 143.3, 140.1, 138.8, 138.3, 137.1, 136.5, 136.4, 136.2, 135.9, 134.7, 133.0, 131.6, 131.0, 130.9, 130.5, 129.3, 129.14, 129.07, 128.6, 128.4, 128.1, 127.9, 127.6, 127.5, 127.4, 127.2, 127.1, 126.8, 126.7, 126.4, 126.34, 126.27, 126.0, 125.4, 123.8, 123.7, 122.8, 122.5, 122.3, 122.2, 122.0, 121.7, 121.6, 121.5, 121.3, 121.2, 121.02, 120.98, 120.2, 120.1, 119.3, 118.3, 117.9,

117.0, 115.3, 66.1, 64.7, 57.5, 54.1, 35.1, 34.4, 31.6, 31.5, 20.8, 20.7, 20.1, 19.9, 19.8, 19.7. UV-vis (CH<sub>2</sub>Cl<sub>2</sub>) λ<sub>max</sub>/nm (logε): 255 (4.95), 273 (4.86), 341 (4.69), 400 (4.52), 427 (4.43), 565 (4.41), 600 (4.42), 680 (3.67). ESI-HRMS calc. for C<sub>84</sub>H<sub>68</sub>N<sub>6</sub>Ni<sup>+</sup> [M]<sup>+</sup>: 1218.4853, Found: 1218.4795 and for C<sub>84</sub>H<sub>69</sub>N<sub>6</sub>Ni<sup>+</sup> [M+H]<sup>+</sup>: 1219.4932, Found: 1219.4862.

**8:** yield 8 mg (20%). <sup>1</sup>H NMR (500 MHz, CDCl<sub>3</sub>, 298 K) δ: 8.08 (s, 2H, 9' + 9''), 8.07 (d, 2H, 6' + 6''), 8.03 (d, <sup>4</sup>J = 1.6 Hz, 2H, 11' + 11''), 7.82 (d, <sup>3</sup>J = 8.1 Hz, 2H, 14' + 14''), 7.32 (m, 2H, 5' + 5''), 7.13 (m, 4H, 4' + 4'' + 3' + 3''), 7.00 (td, <sup>3</sup>J = 7.5 Hz, <sup>4</sup>J = 1.5 Hz, 2H, 15' + 15''), 6.47 (s, 4H, 5-*m*-Mes + 14-*m*-Mes), 6.40 (t, <sup>3</sup>J = 7.5 Hz, 2H, 16' + 16''), 5.89 (dd, <sup>3</sup>J = 8.2 Hz, <sup>4</sup>J = 1.1 Hz, 2H, 17' + 17''), 4.92 (d, <sup>3</sup>J = 4.0 Hz, 2H, pyr), 3.63 (d, <sup>3</sup>J = 4.0 Hz, 2H, pyr), 2.36 (s, 12H, 5-*o*-Me + 14-*o*-Me), 2.01 (s, 6H, 5-*p*-Me + 14-*p*-Me), 1.42 (s, 18H, 10'-*t*Bu). UV-vis (CH<sub>2</sub>Cl<sub>2</sub>) λ<sub>max</sub>/nm (logε): 307 (4.41), 341 (4.03), 427 (3.83), 472 (sh), 499 (sh), 612 (sh), 672 (3.95), 807 (sh), 896 (sh). ESI-HRMS calc. for C<sub>84</sub>H<sub>64</sub>N<sub>6</sub>Ni<sup>+</sup> [M]<sup>+</sup>: 1215.4619, Found: 1215.4589 and for C<sub>84</sub>H<sub>65</sub>N<sub>6</sub>Ni<sup>+</sup> [M+H]<sup>+</sup>: 1214.4540, Found: 1214.4555.

Due to a spontaneous precipitation of the compound, we were unable to record a <sup>13</sup>C NMR spectrum.

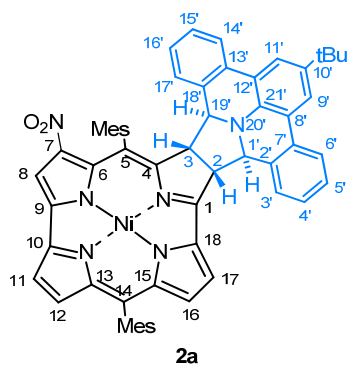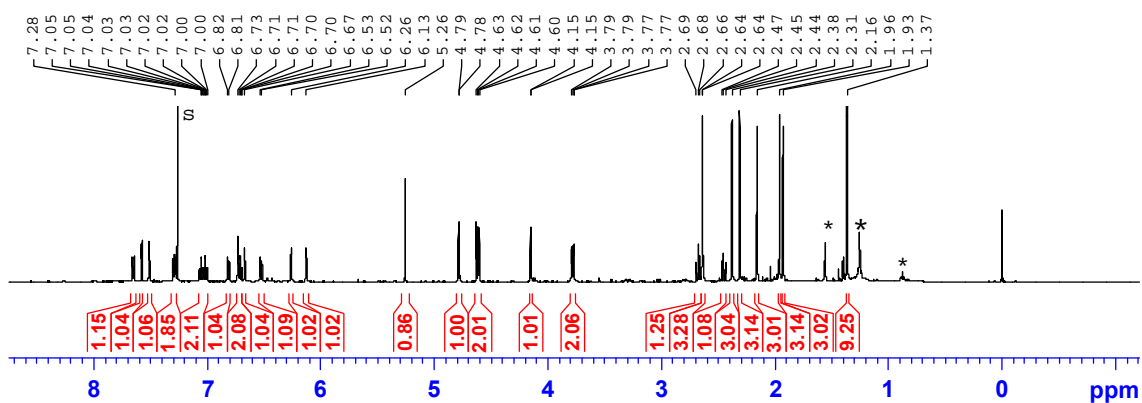

Figure S1.  $^1\text{H}$  NMR spectrum of **2a** (500 MHz, 298 K,  $\text{CDCl}_3$ ).

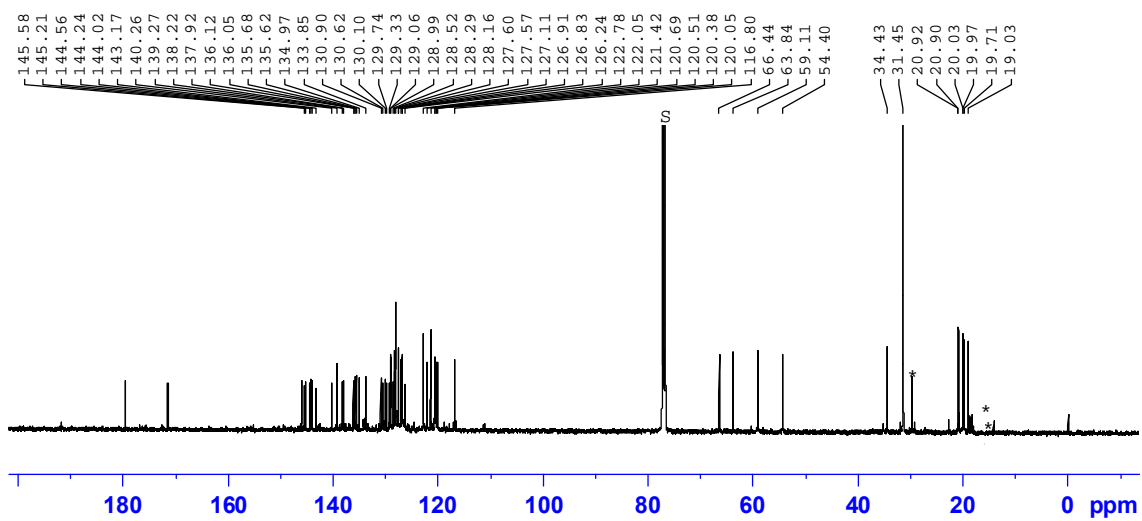

Figure S2.  $^{13}\text{C}$  NMR spectrum of **2a** (125 MHz, 298 K,  $\text{CDCl}_3$ ).

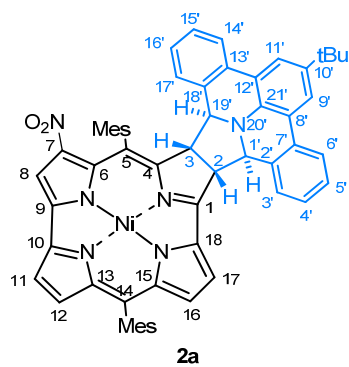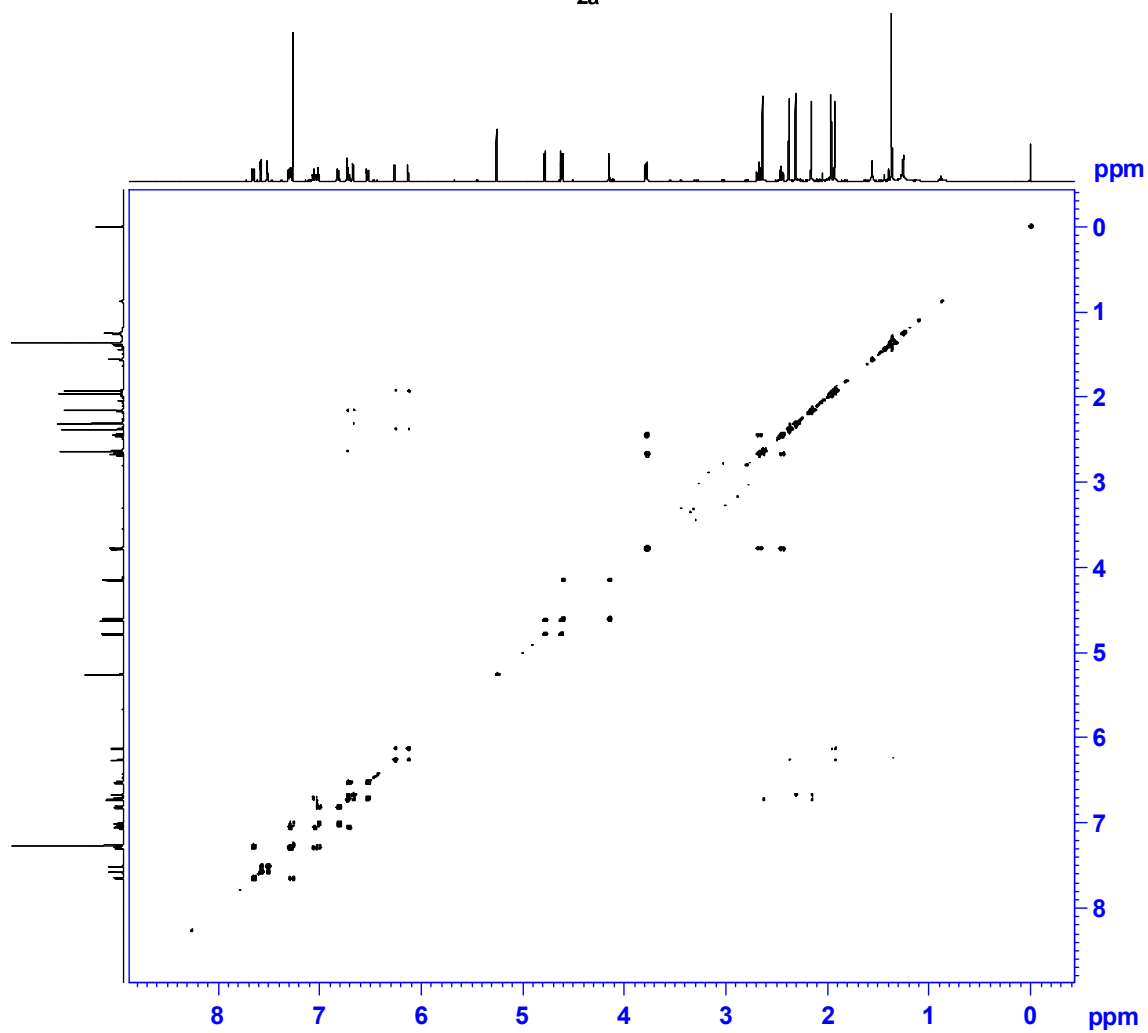

**Figure S3.** <sup>1</sup>H, <sup>1</sup>H COSY spectrum of **2a** (500 MHz, 298 K, CDCl<sub>3</sub>).

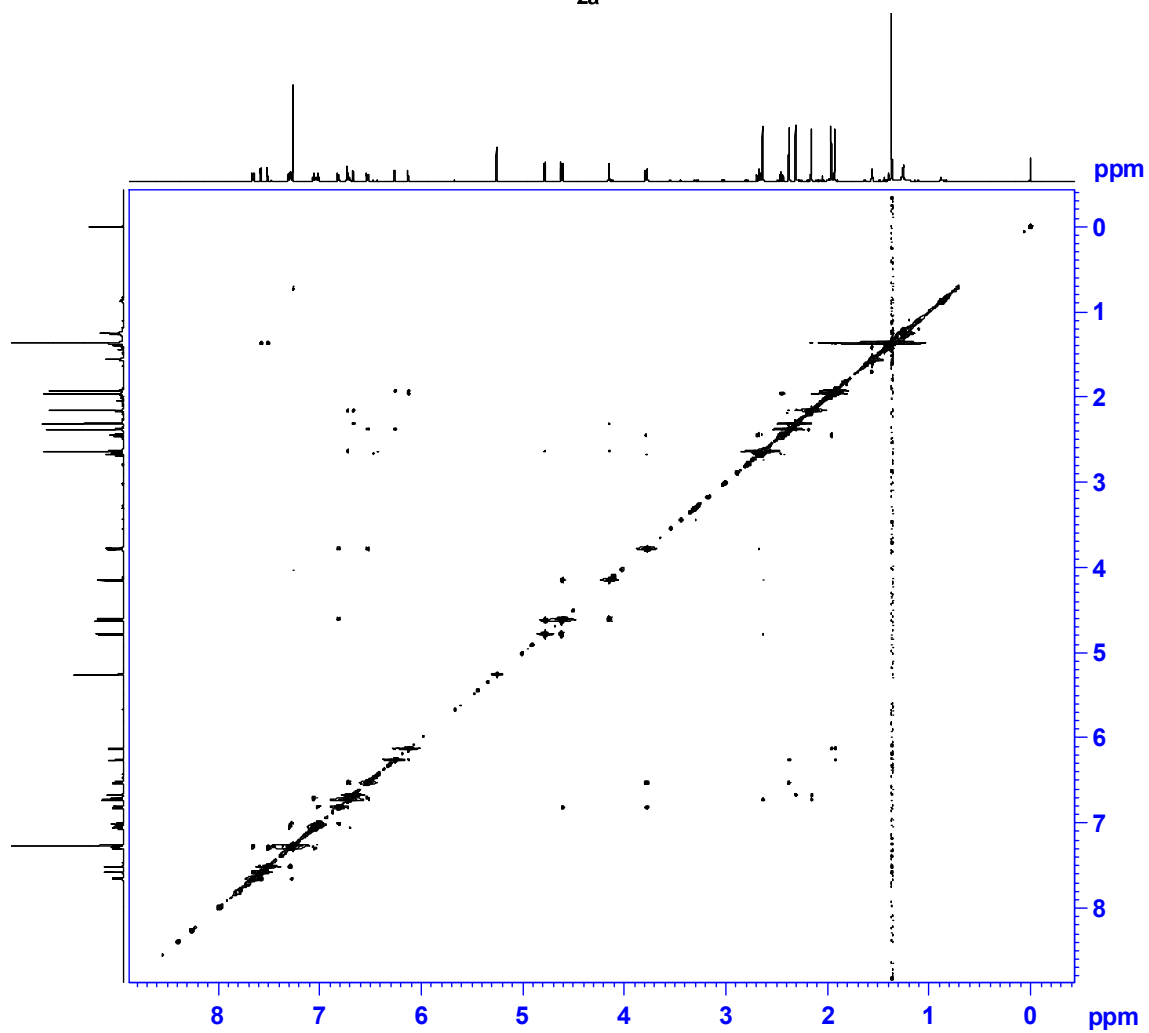

**Figure S4.** <sup>1</sup>H, <sup>1</sup>H NOESY spectrum of **2a** (500 MHz, 298 K, CDCl<sub>3</sub>).



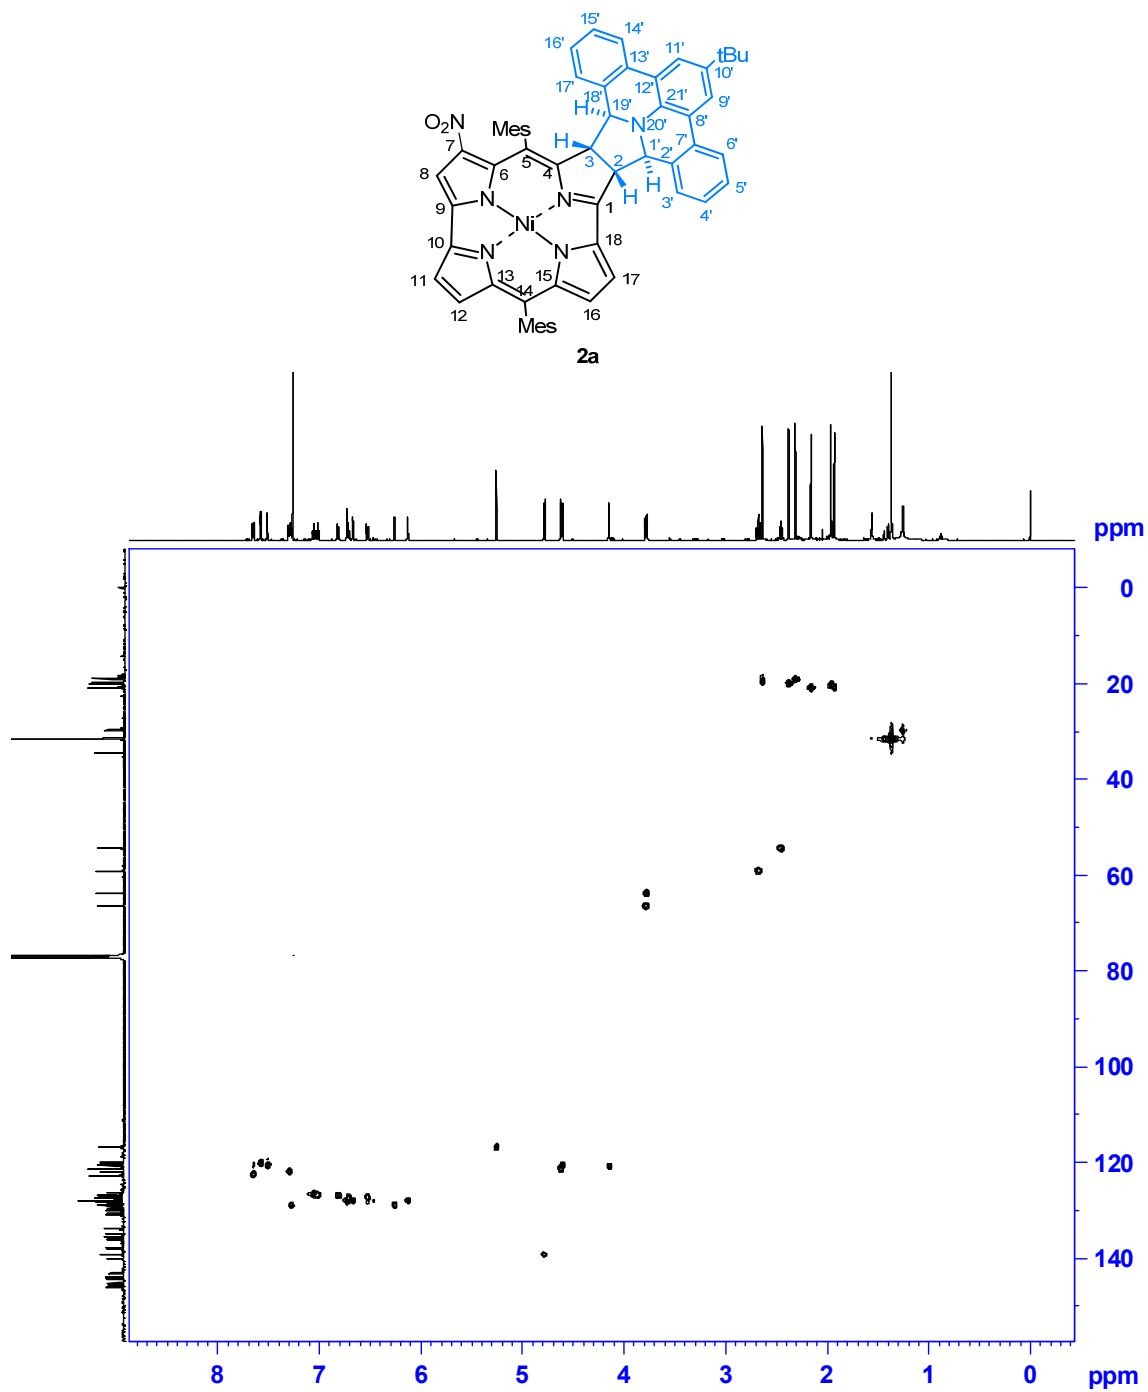

**Figure S5.**  $^1\text{H}$ ,  $^{13}\text{C}$  HSQC spectrum of **2a** (500/125 MHz, 298 K,  $\text{CDCl}_3$ ).

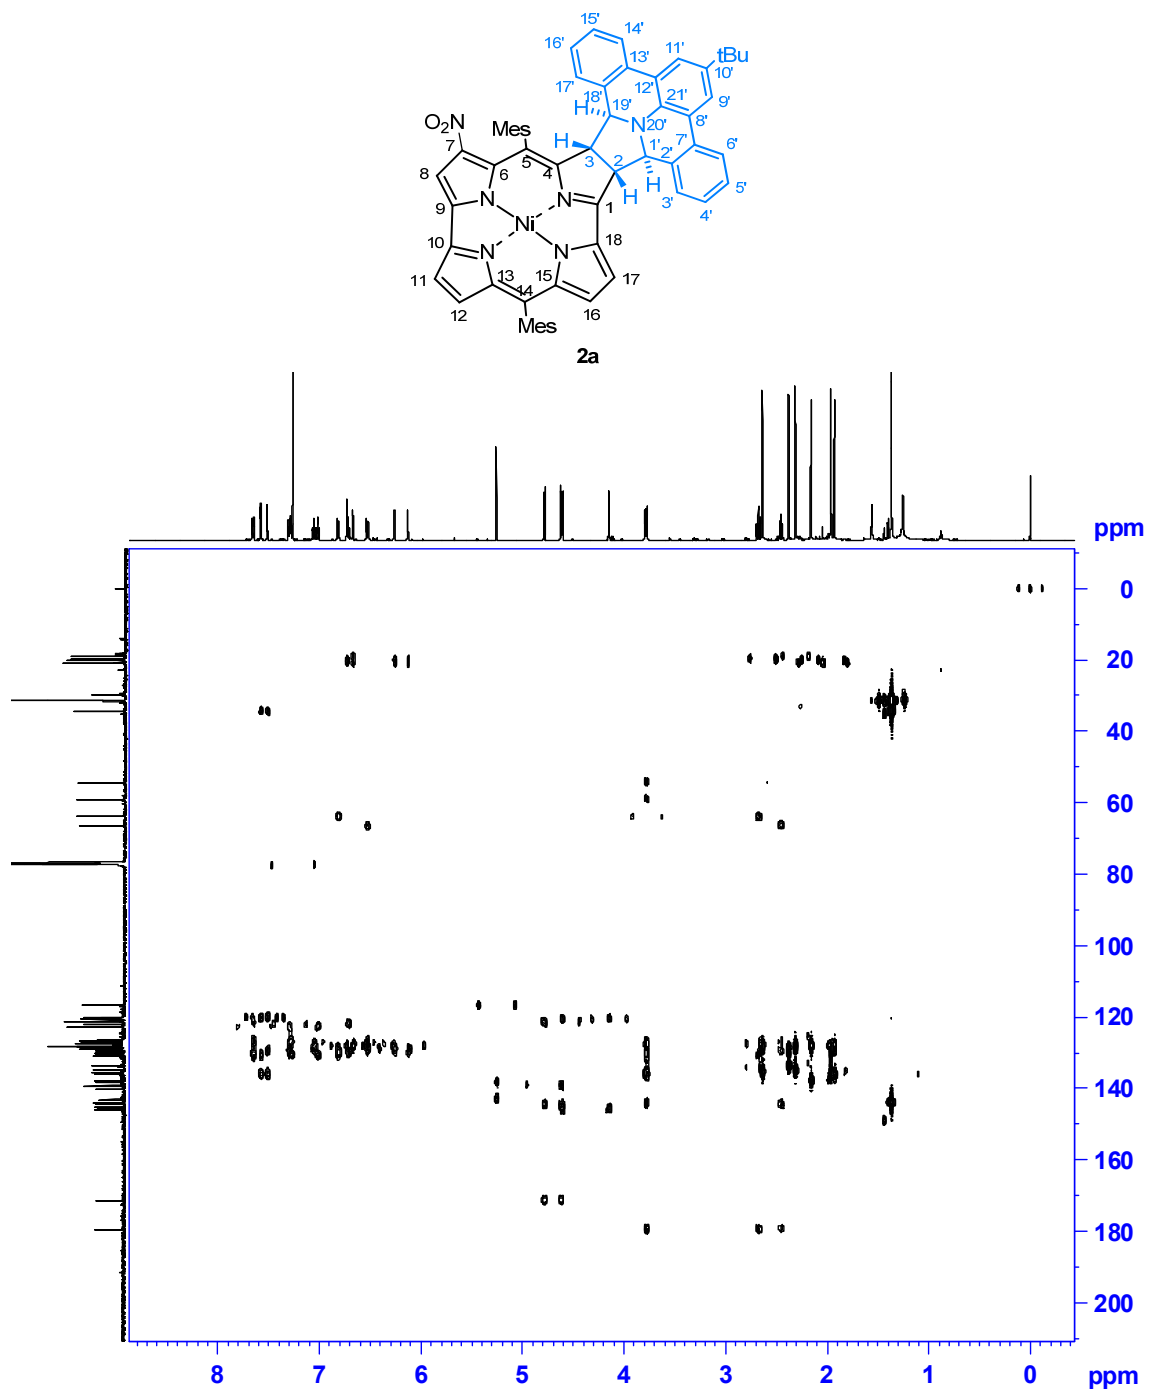

**Figure S6.**  $^1\text{H}$ ,  $^{13}\text{C}$  HMBC spectrum of **2a** (500/125 MHz, 298 K,  $\text{CDCl}_3$ ).

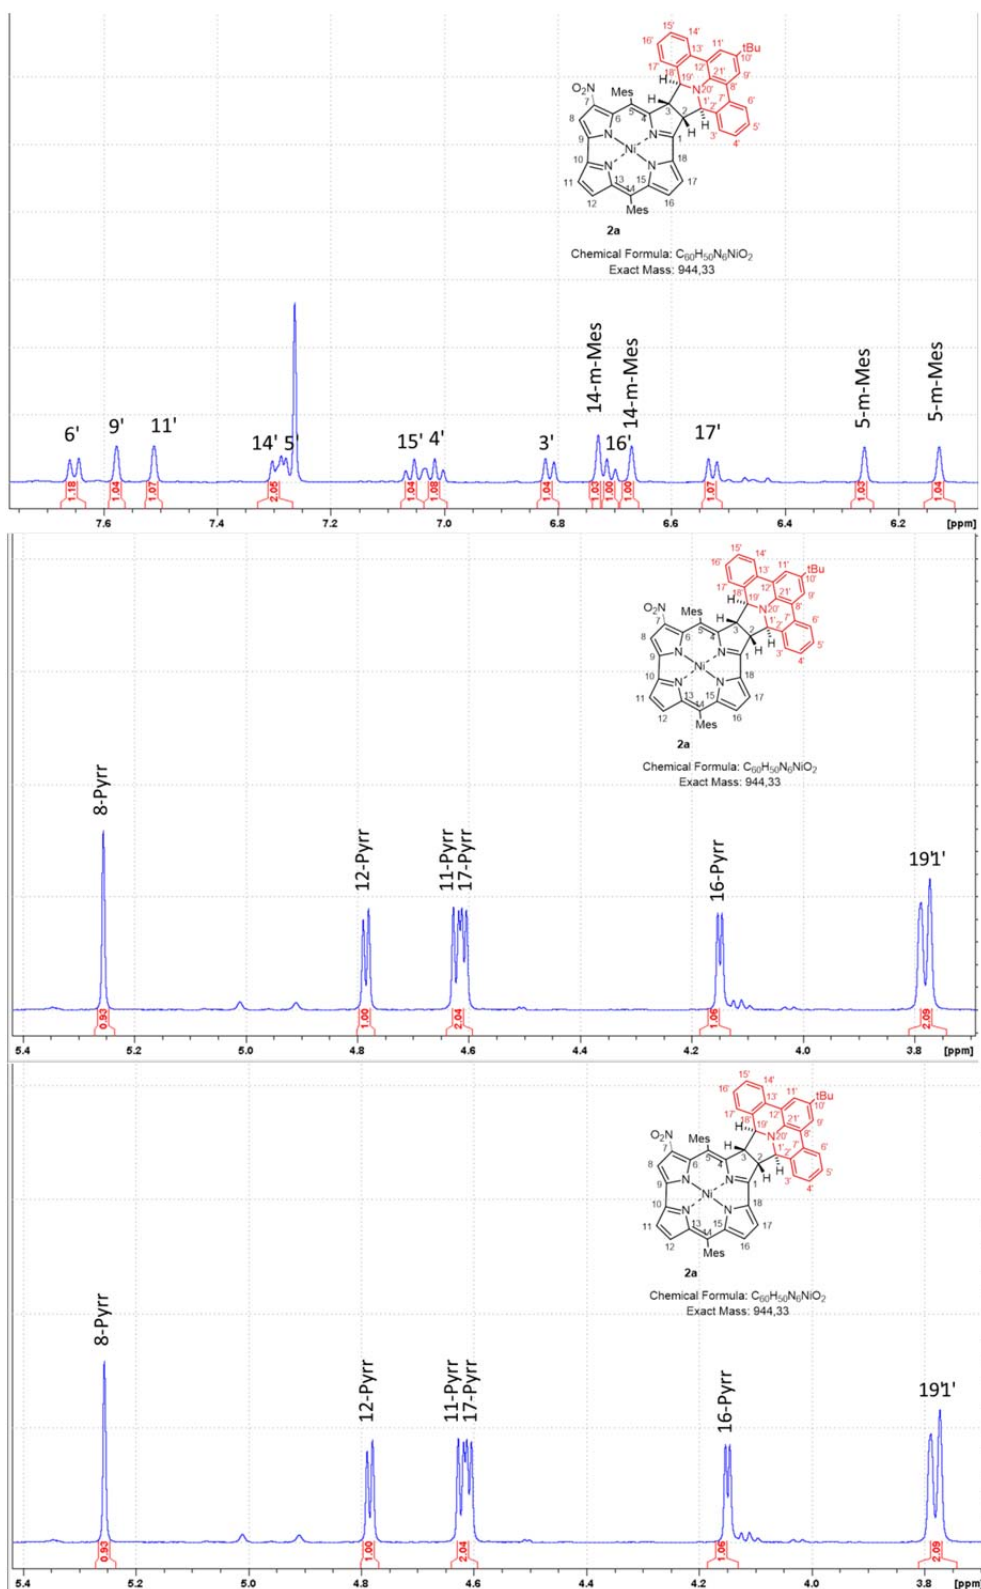

**Figure S7.**  $^1\text{H}$  NMR signal assignments for **2a** (500 MHz, 298 K,  $\text{CDCl}_3$ ).

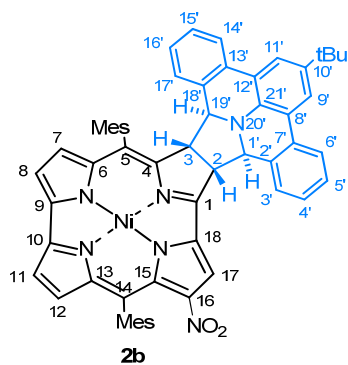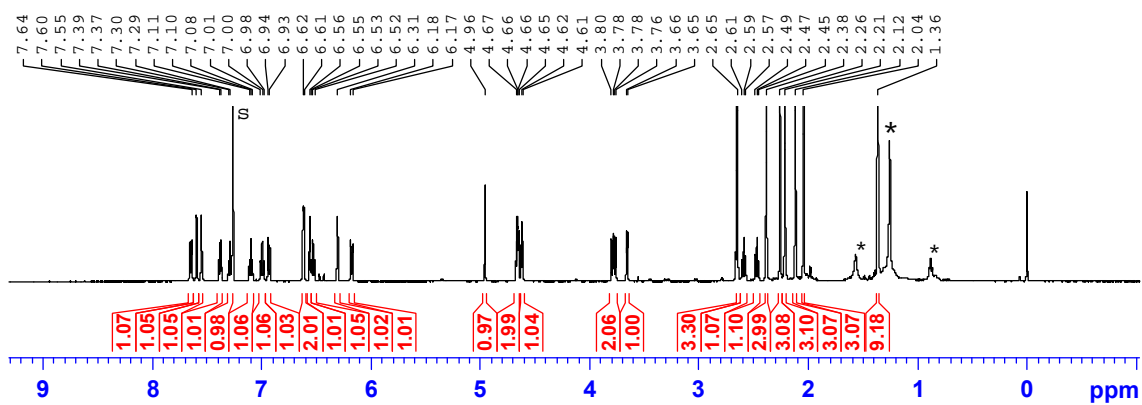

**Figure S8.**  $^1\text{H}$  NMR spectrum of **2b** (500 MHz, 298 K,  $\text{CDCl}_3$ ).

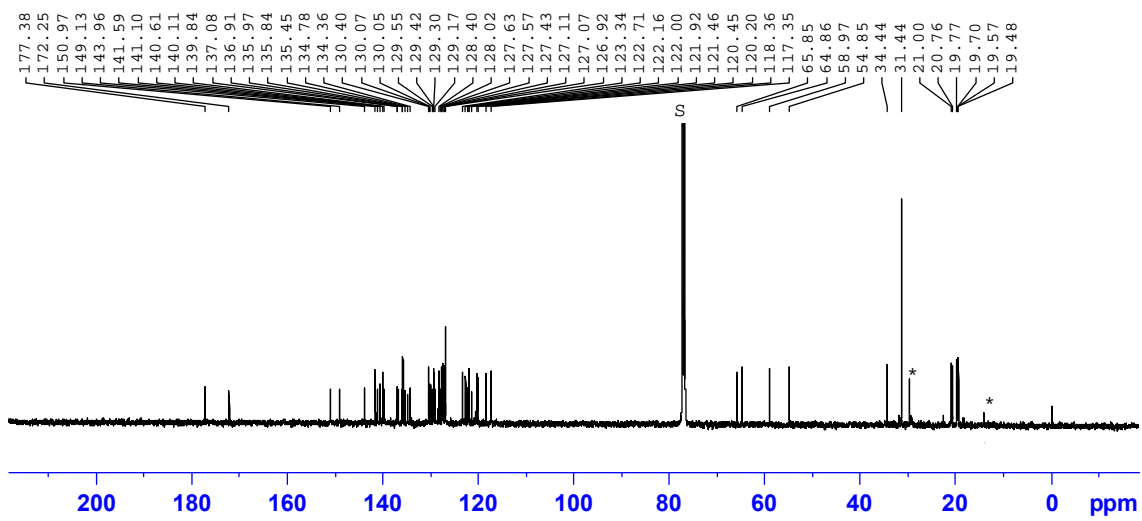

**Figure S9.**  $^{13}\text{C}$  NMR spectrum of **2b** (125 MHz, 298 K,  $\text{CDCl}_3$ ).

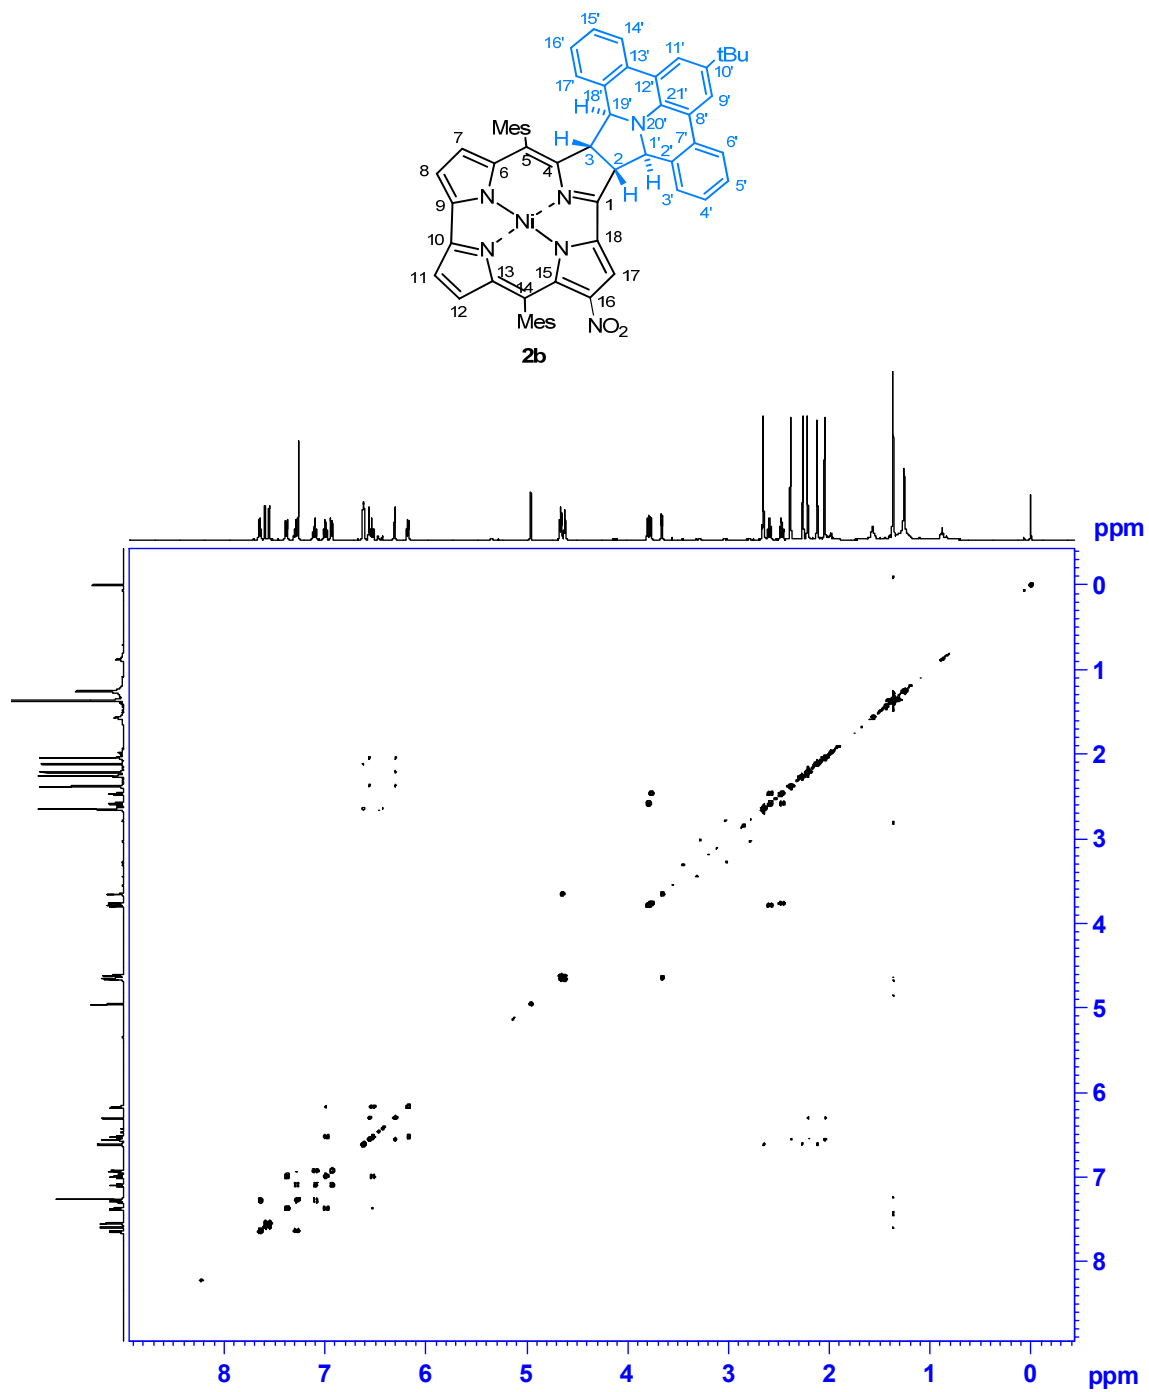

**Figure S10.**  $^1\text{H}$ ,  $^1\text{H}$  COSY spectrum of **2b** (500 MHz, 298 K, CDCl<sub>3</sub>).

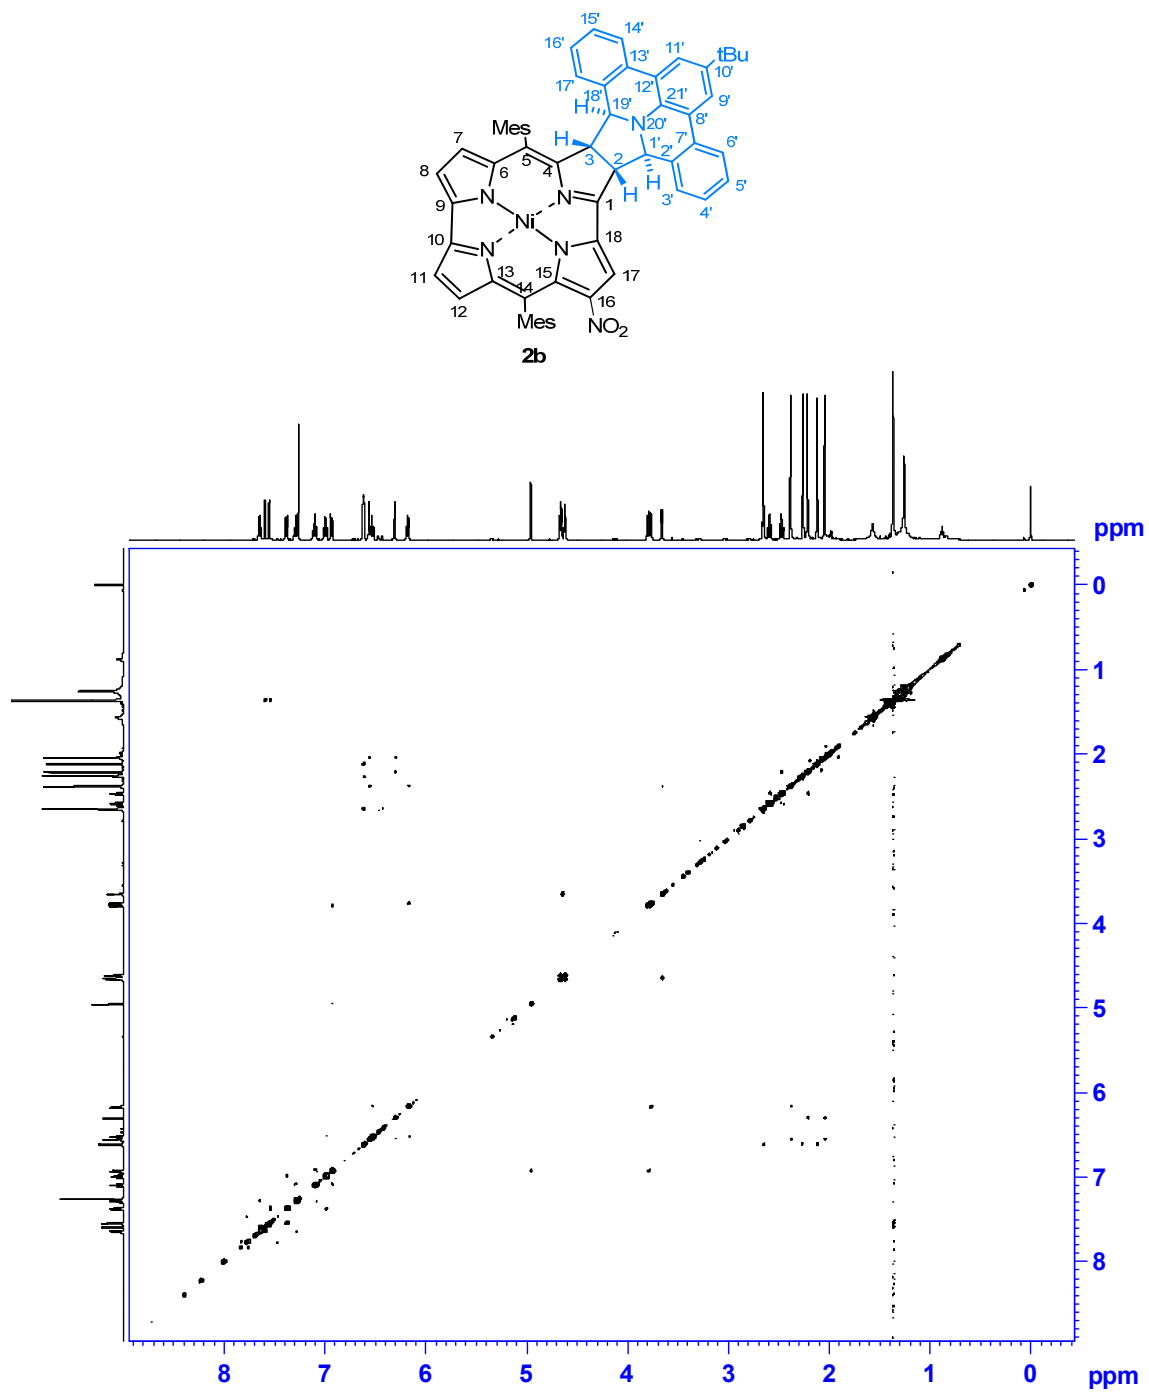

Figure S11.  $^1\text{H}$ ,  $^1\text{H}$  NOESY spectrum of **2b** (500 MHz, 298 K,  $\text{CDCl}_3$ ).

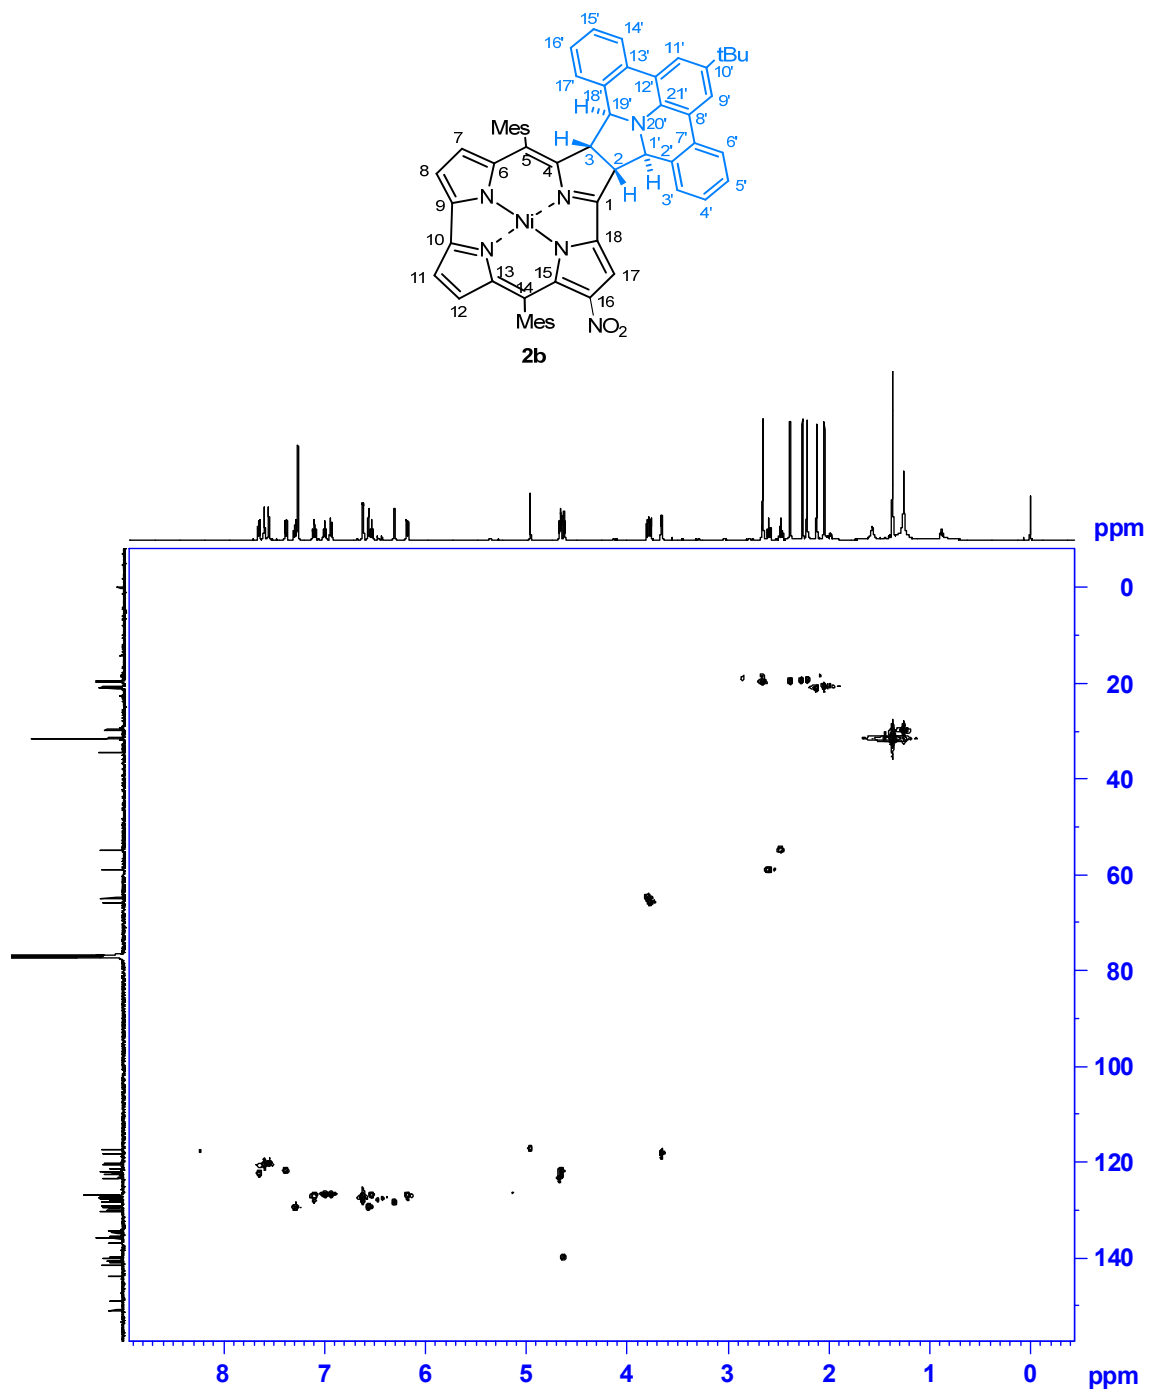

Figure S12.  $^1\text{H}$ ,  $^{13}\text{C}$  HSQC spectrum of **2b** (500/125 MHz, 298 K, CDCl<sub>3</sub>).

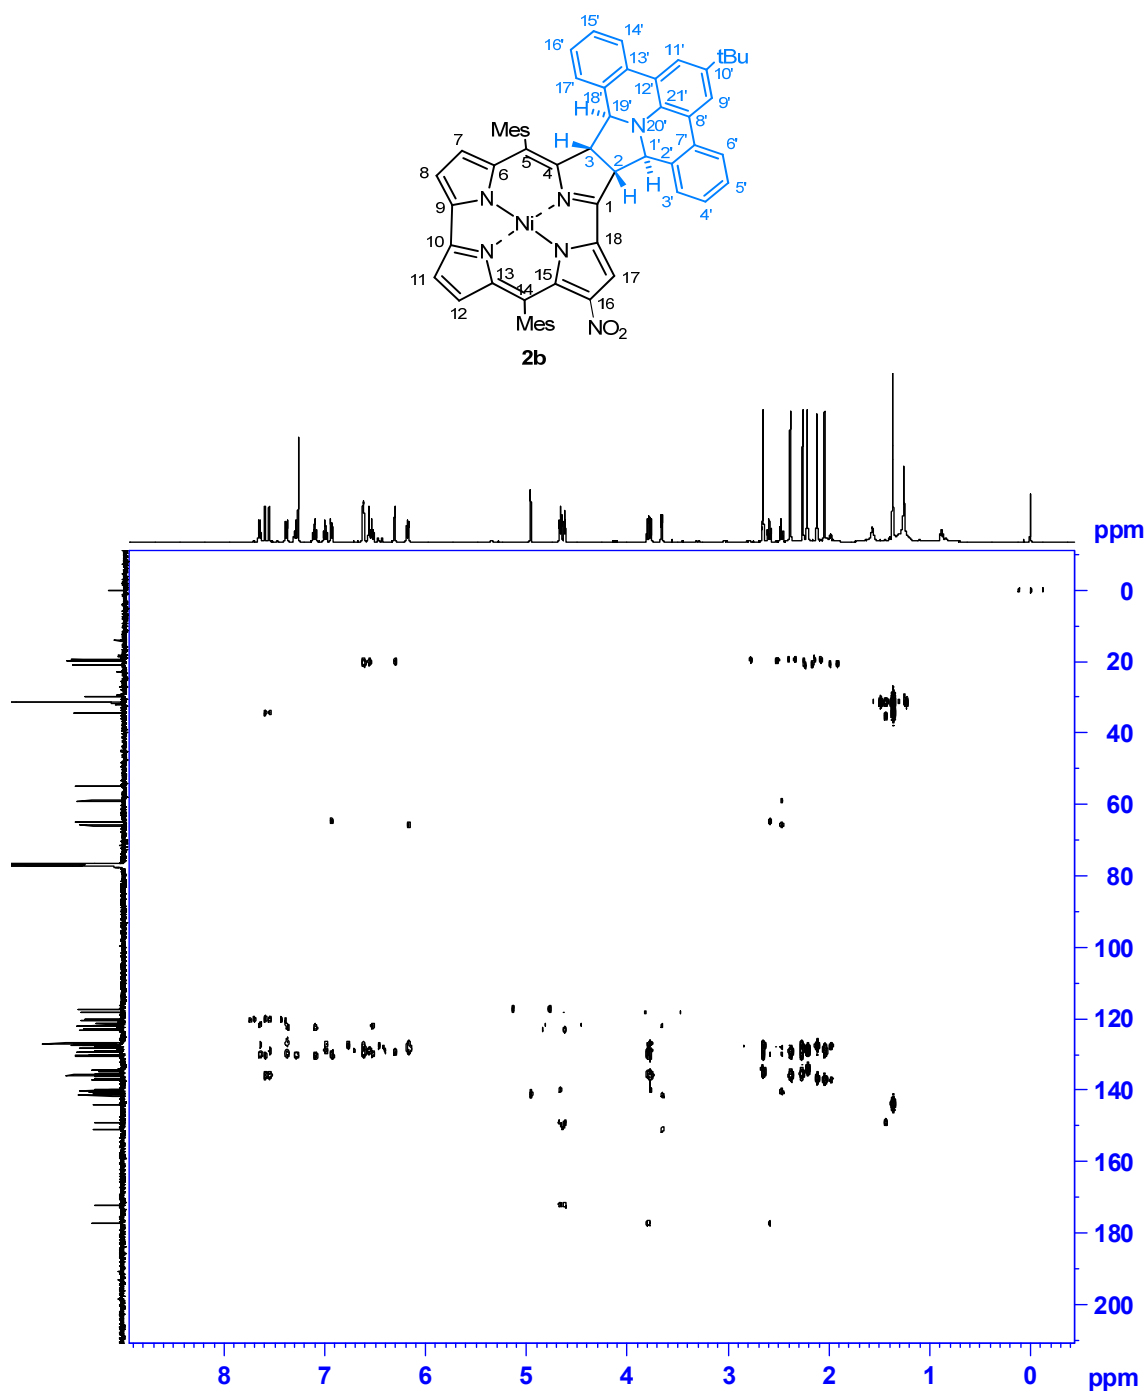

**Figure S13.**  $^1\text{H}$ ,  $^{13}\text{C}$  HMBC spectrum of **2b** (500/125 MHz, 298 K, CDCl<sub>3</sub>).



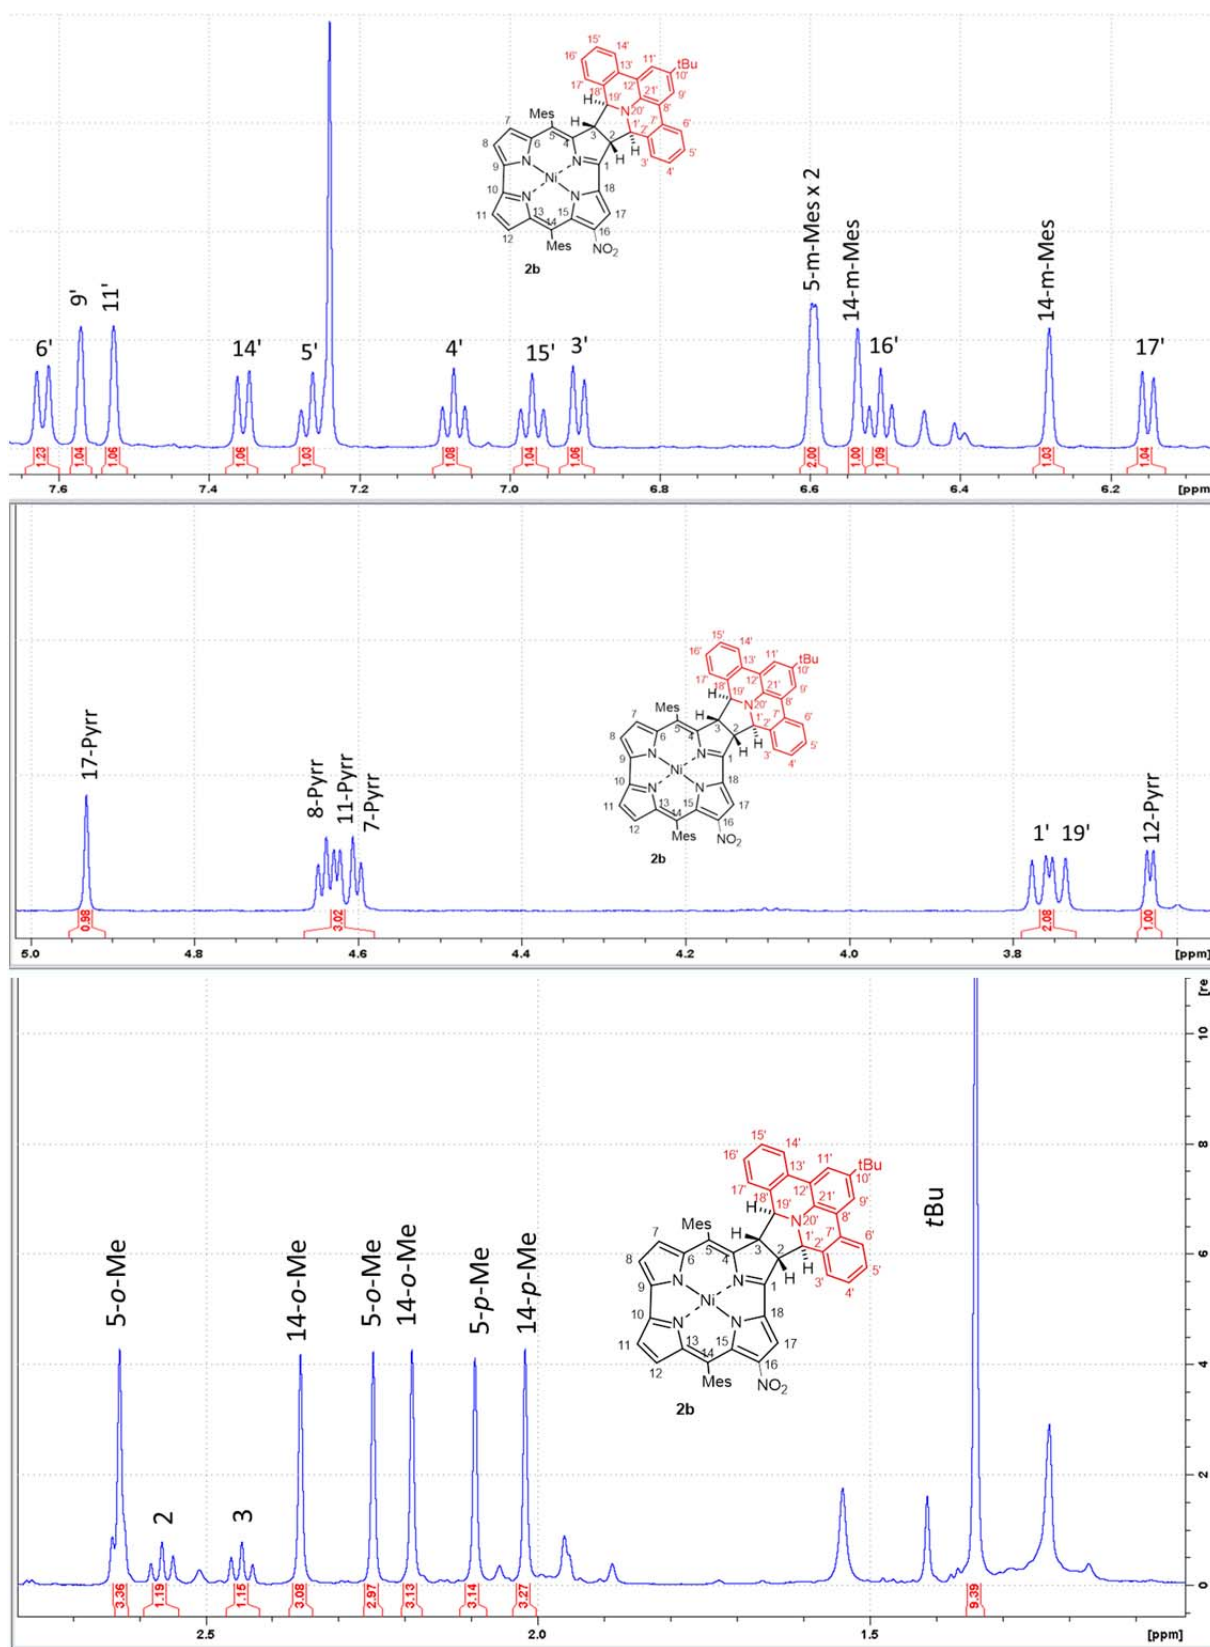

**Figure S14.**  $^1\text{H}$  NMR signal assignments for **2b** (500 MHz, 298 K,  $\text{CDCl}_3$ ).

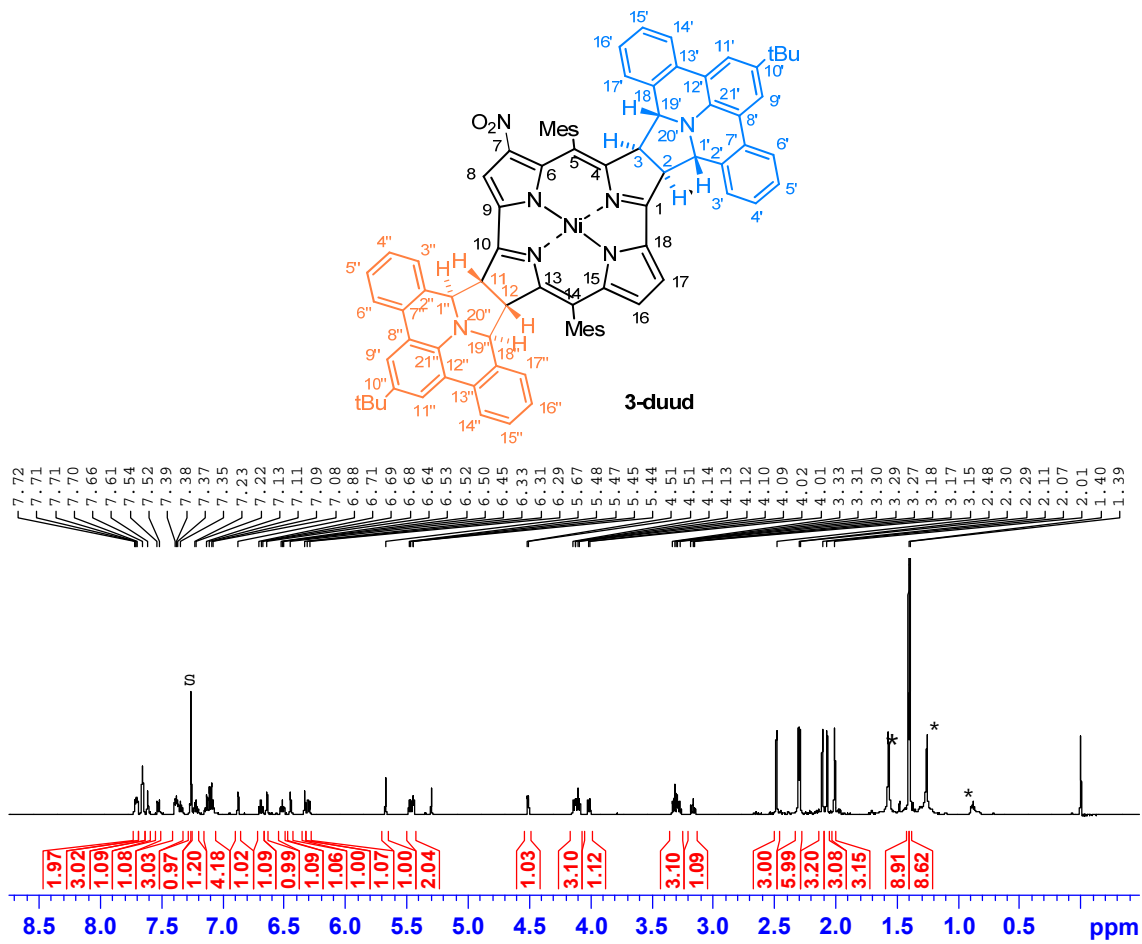

Figure S15.  $^1\text{H}$  NMR spectrum of **3-duud** (500 MHz, 298 K,  $\text{CDCl}_3$ ).

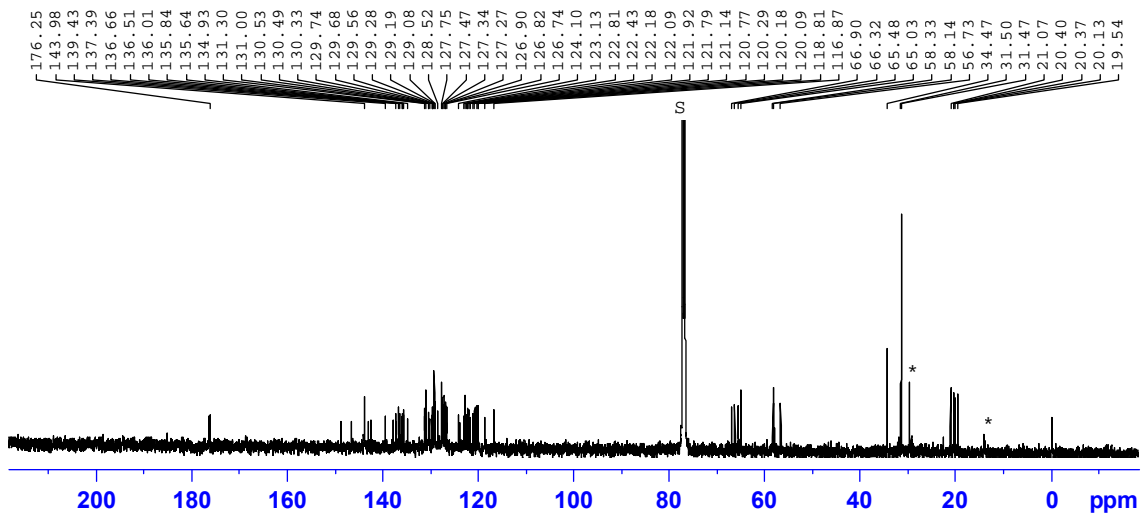

Figure S16.  $^{13}\text{C}$  NMR spectrum of **3-duud** (125 MHz, 298 K,  $\text{CDCl}_3$ ).

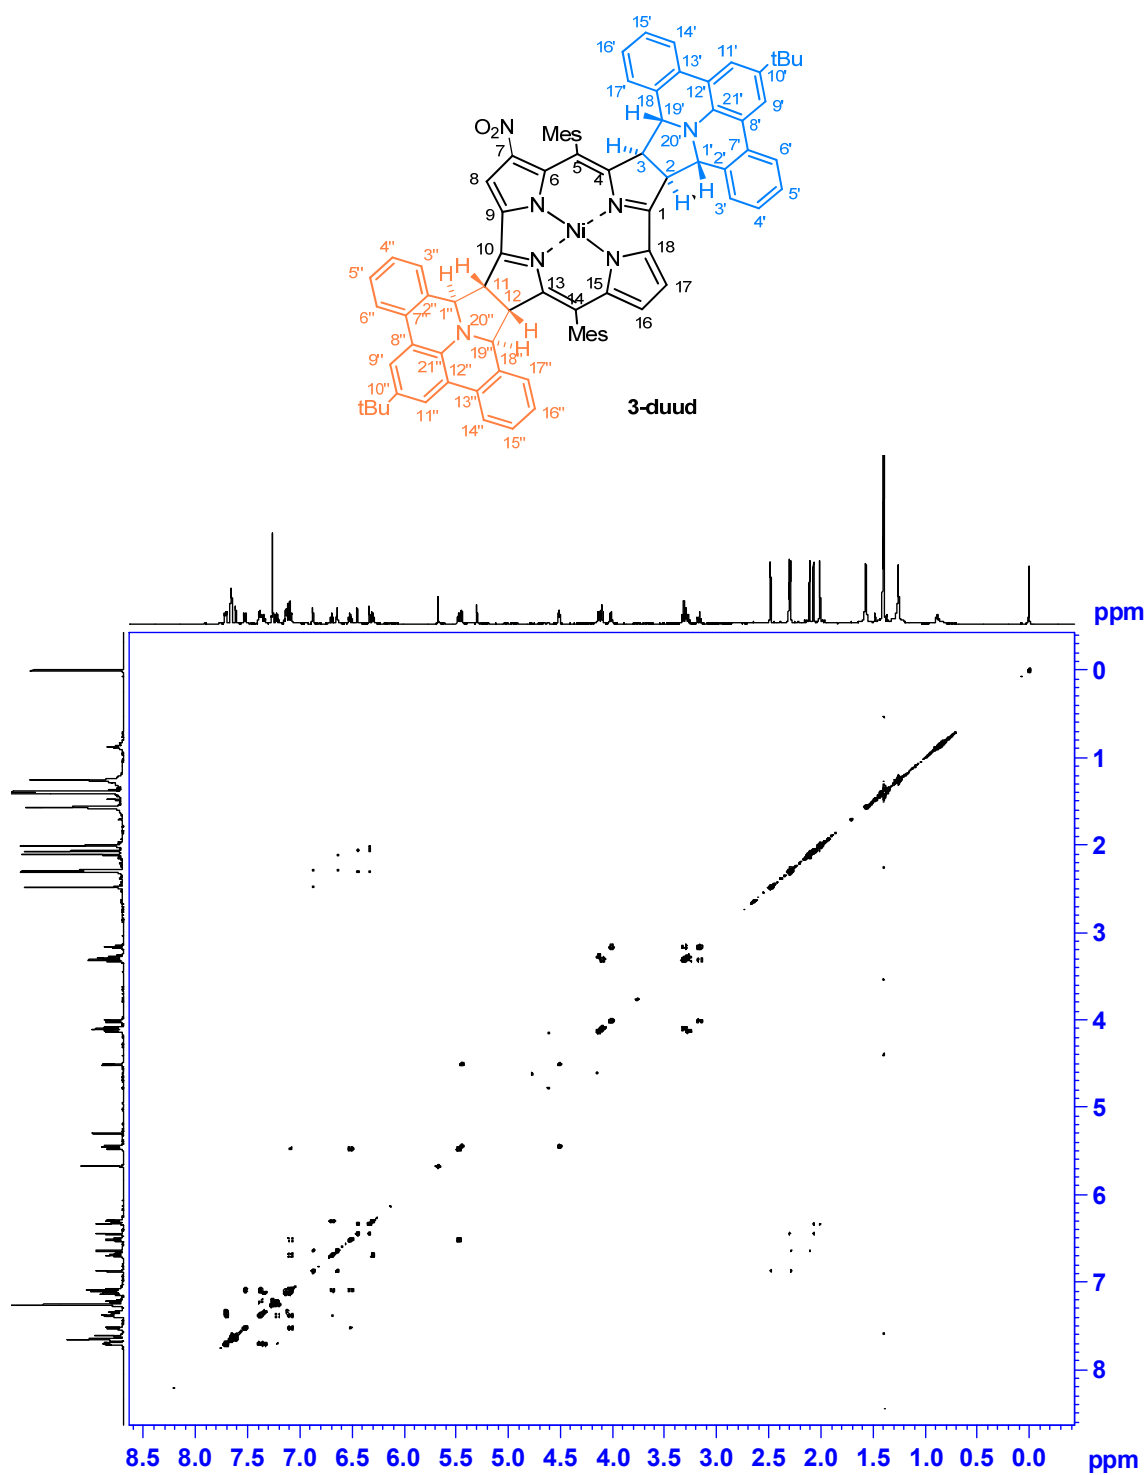

**Figure S17.**  $^1\text{H}$ ,  $^1\text{H}$  COSY spectrum of **3-duud** (500 MHz, 298 K,  $\text{CDCl}_3$ ).

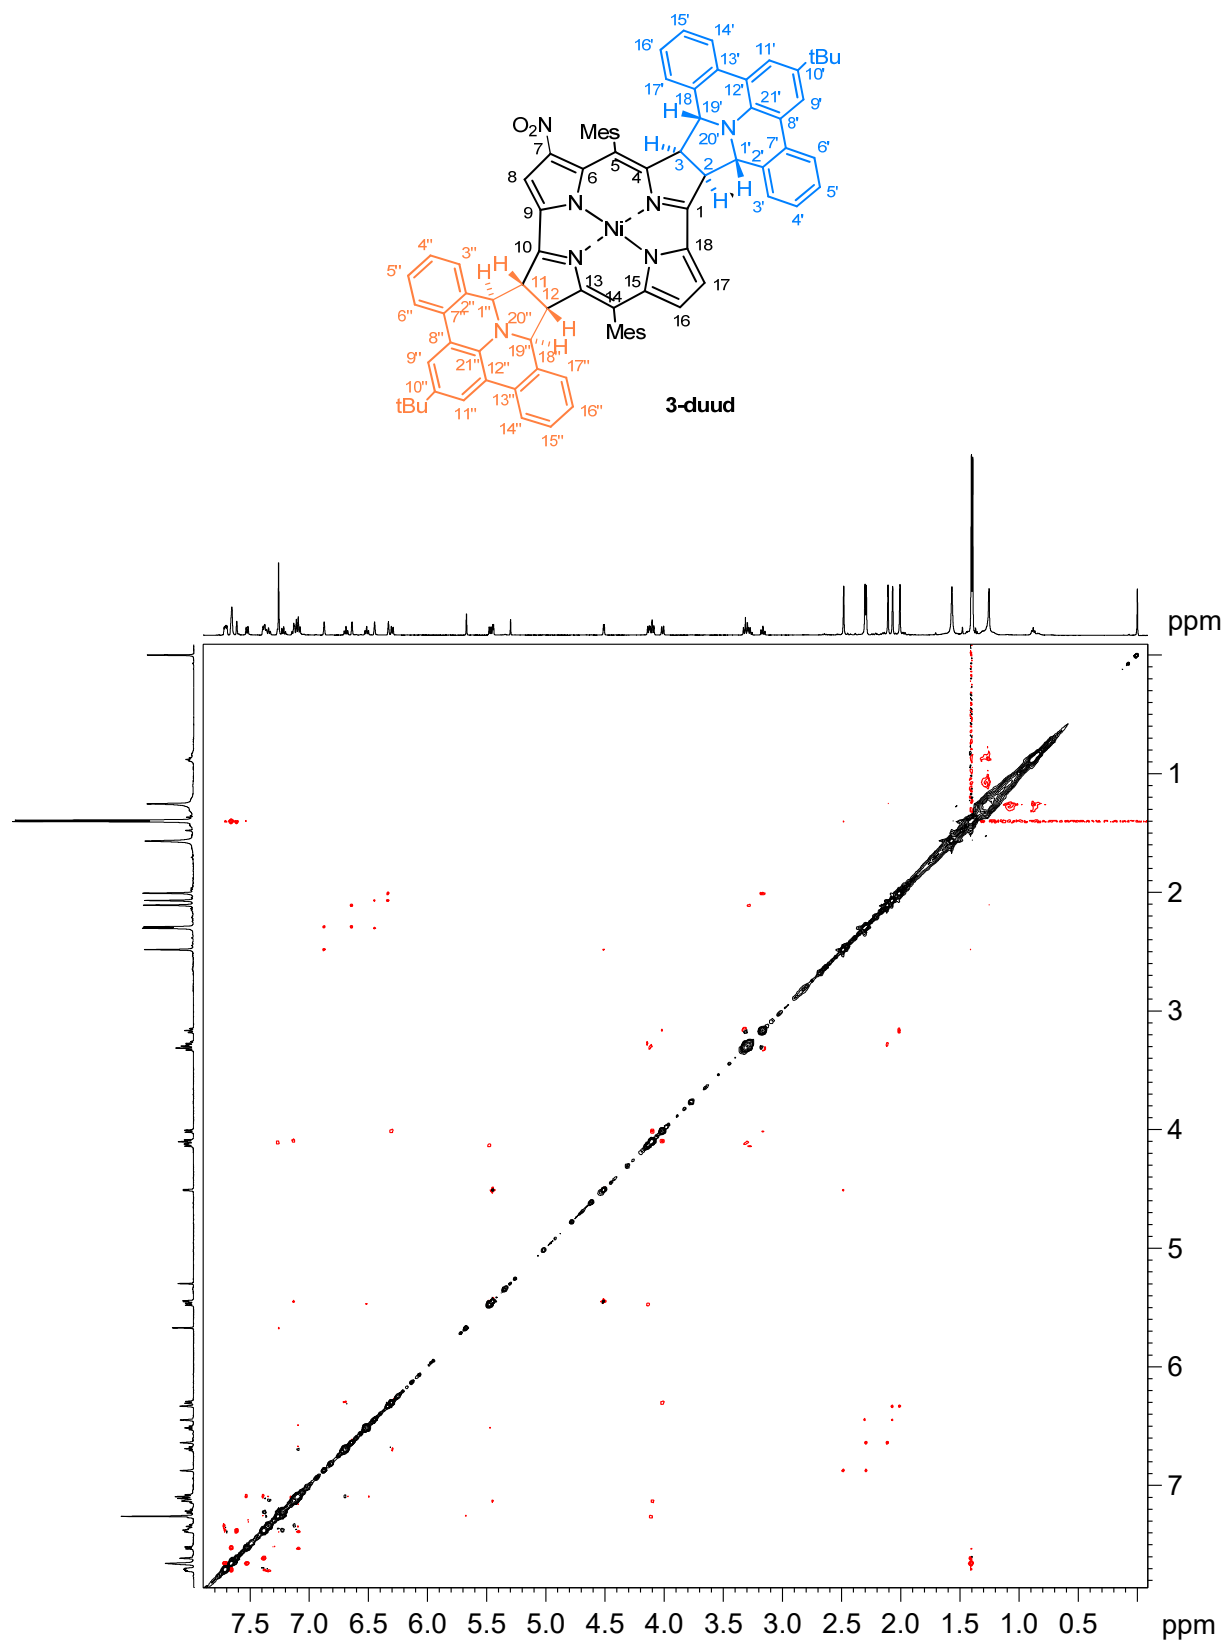

**Figure S18.** <sup>1</sup>H, <sup>1</sup>H NOESY spectrum of **3-duud** (500 MHz, 298 K, CDCl<sub>3</sub>).

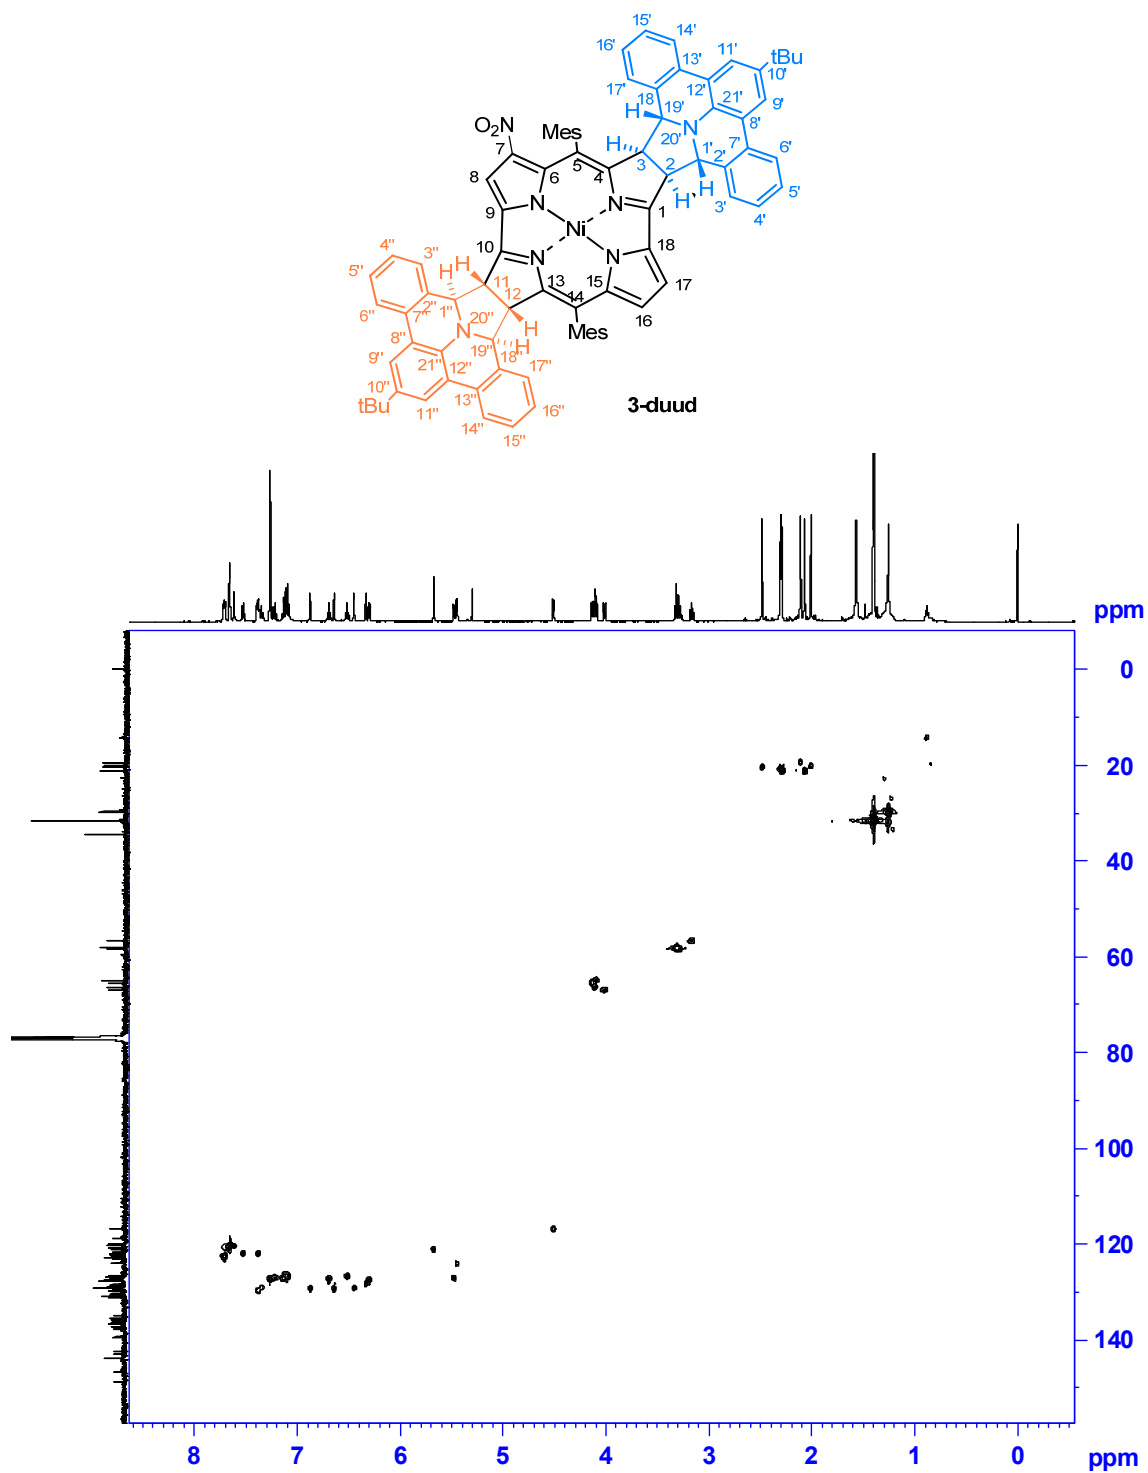

Figure S19. <sup>1</sup>H, <sup>13</sup>C HSQC spectrum of **3-duud** (500/125 MHz, 298 K, CDCl<sub>3</sub>).

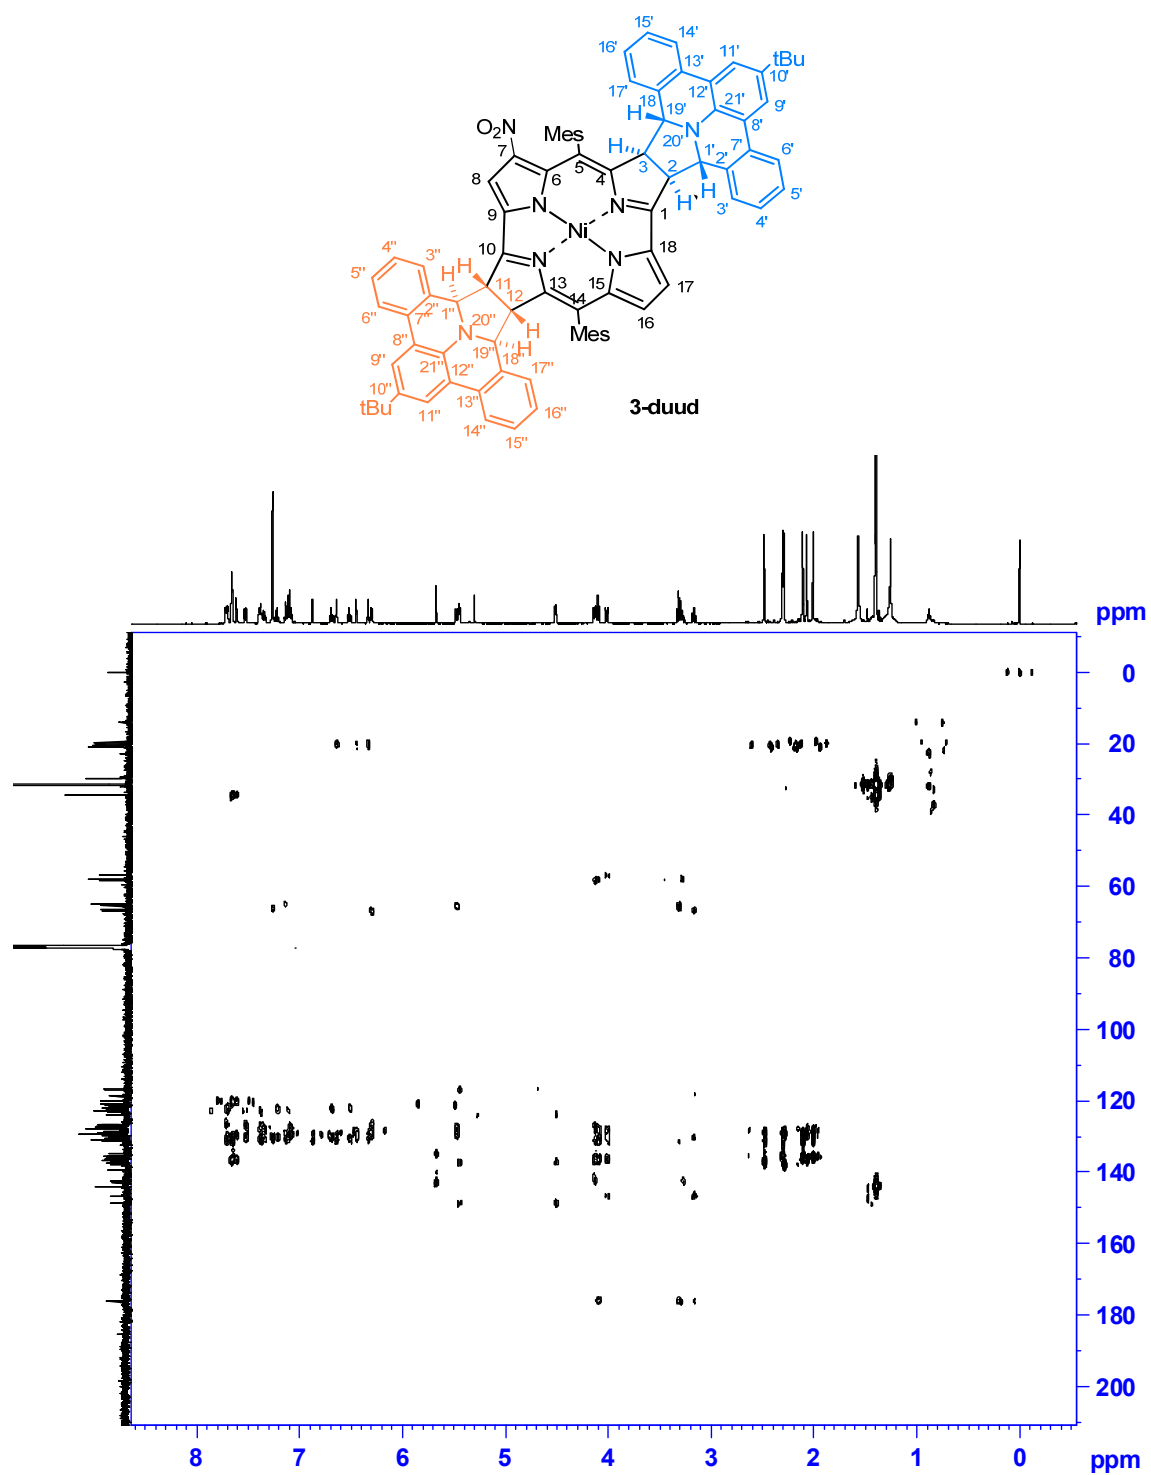

Figure S20. <sup>1</sup>H, <sup>13</sup>C HMBC spectrum of **3-duud** (500/125 MHz, 298 K, CDCl<sub>3</sub>).

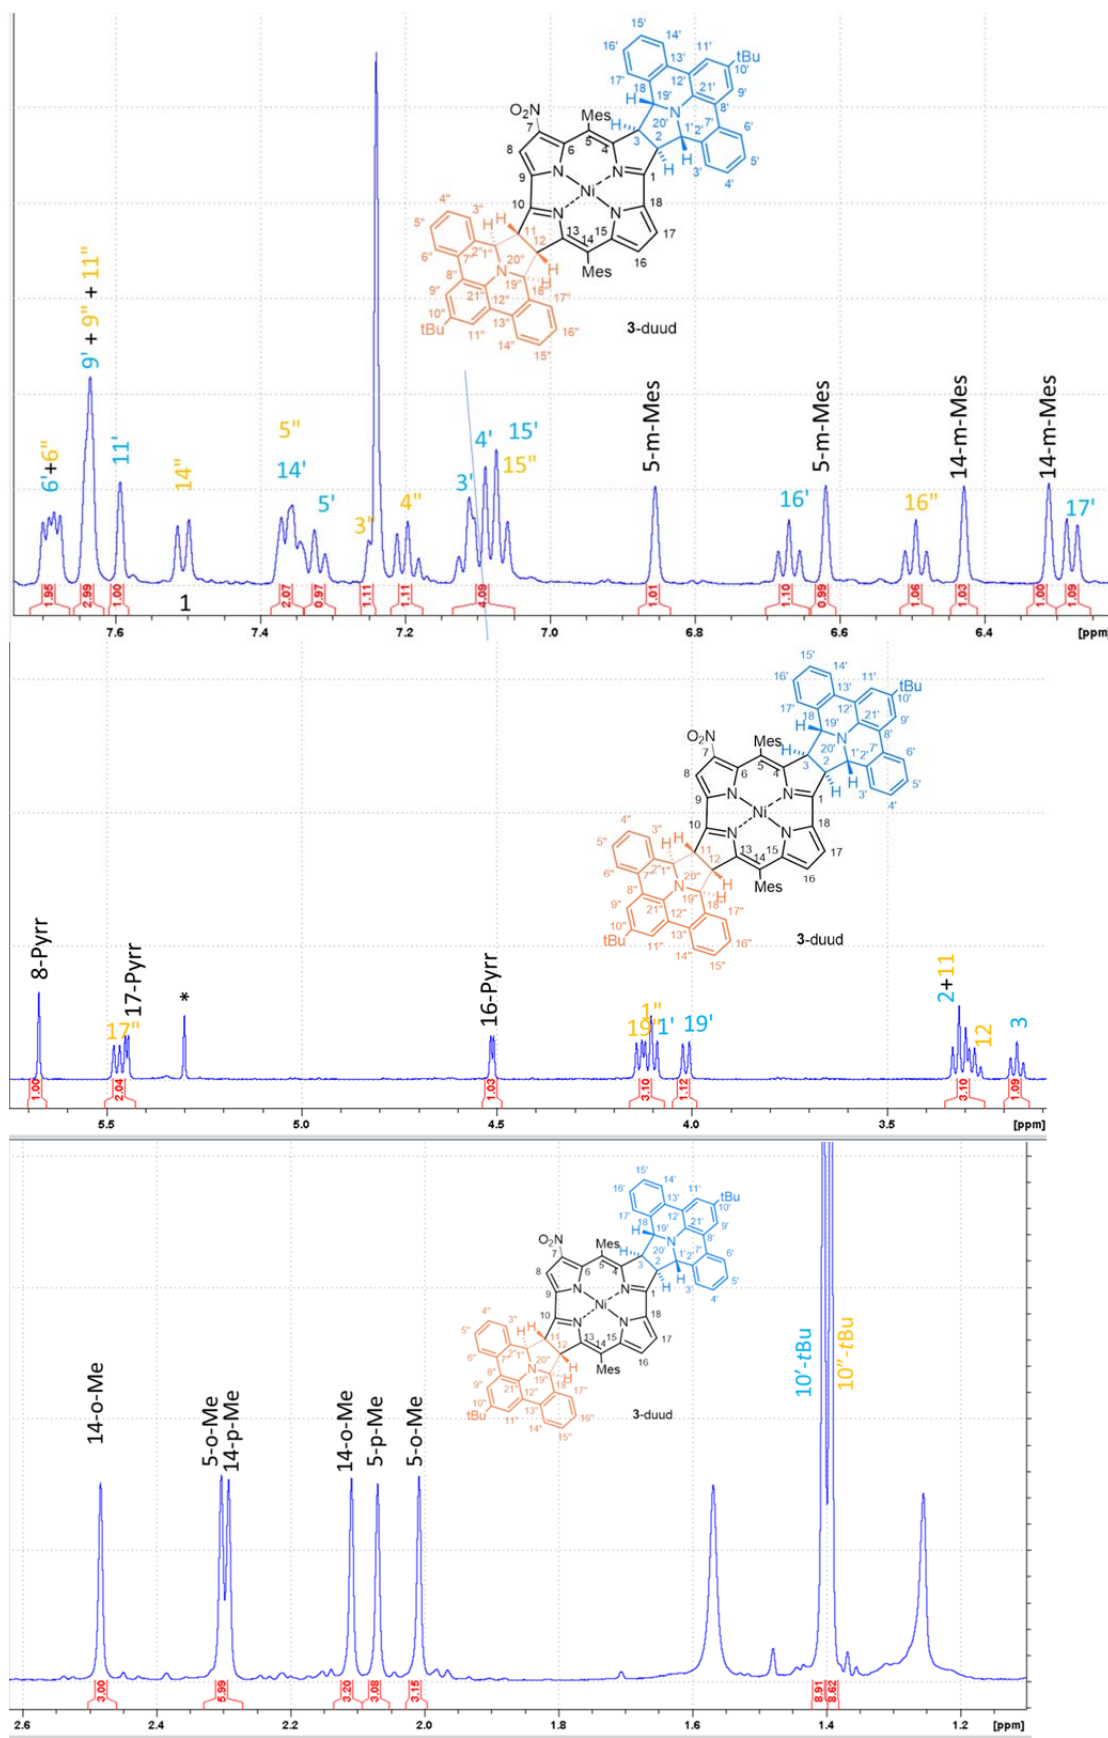

**Figure S21.** <sup>1</sup>H NMR signal assignments for **3-duud** (500 MHz, 298 K, CDCl<sub>3</sub>).

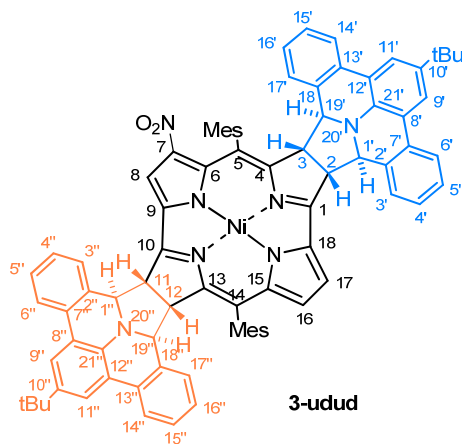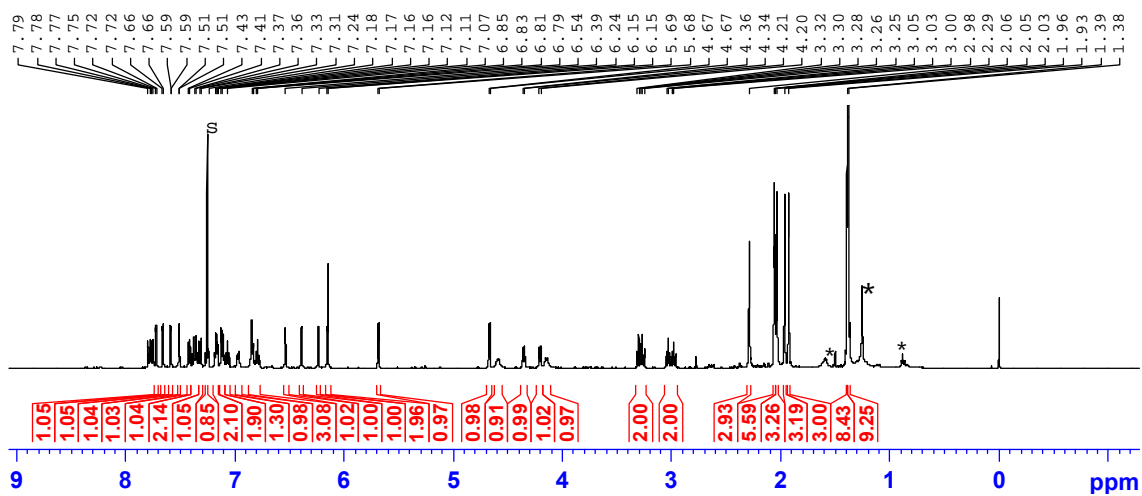

Figure S22.  $^1\text{H}$  NMR spectrum of **3-udud** (500 MHz, 298 K,  $\text{CDCl}_3$ ).

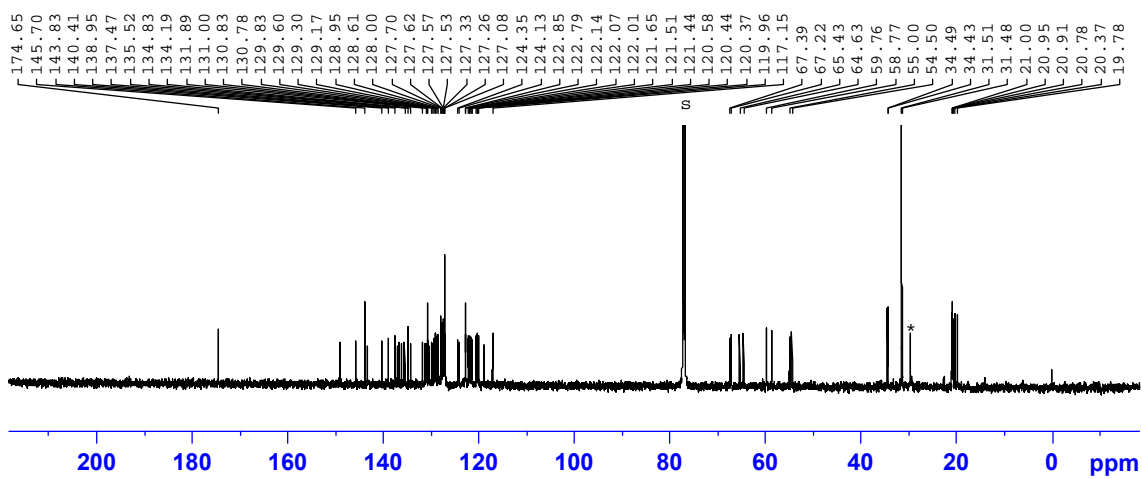

Figure S23.  $^{13}\text{C}$  NMR spectrum of **3-udud** (125 MHz, 298 K,  $\text{CDCl}_3$ ).



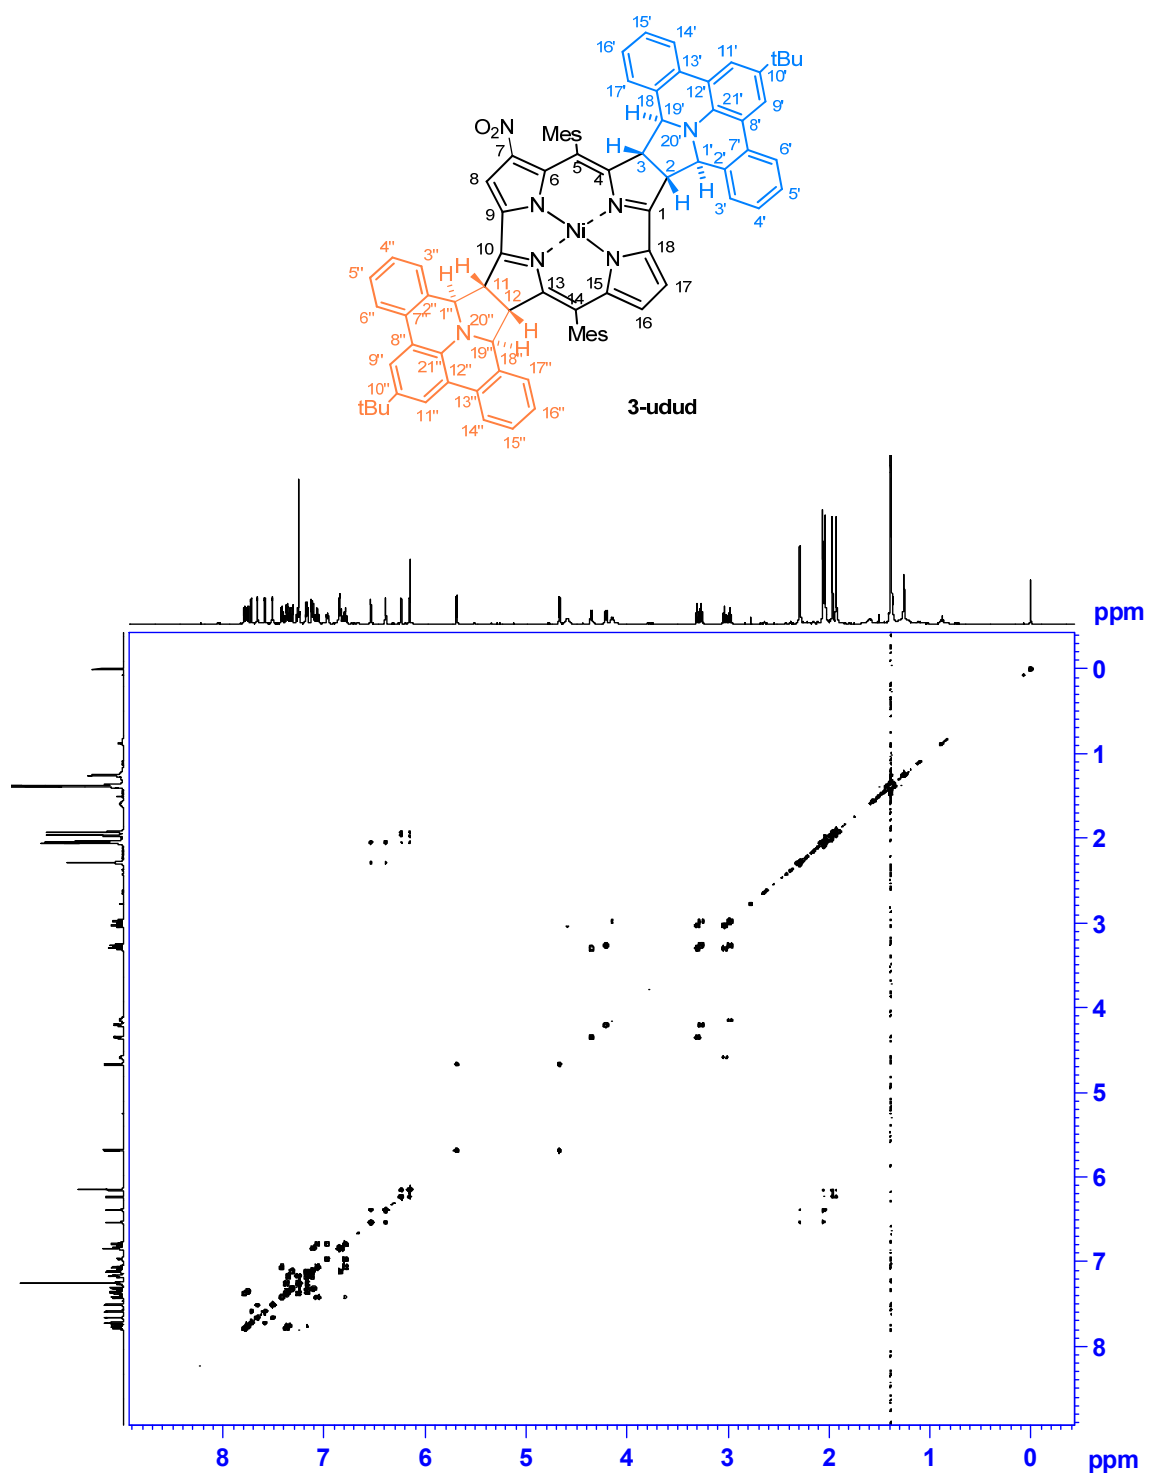

**Figure S24.** <sup>1</sup>H, <sup>1</sup>H COSY spectrum of **3-udud** (500 MHz, 298 K, CDCl<sub>3</sub>).

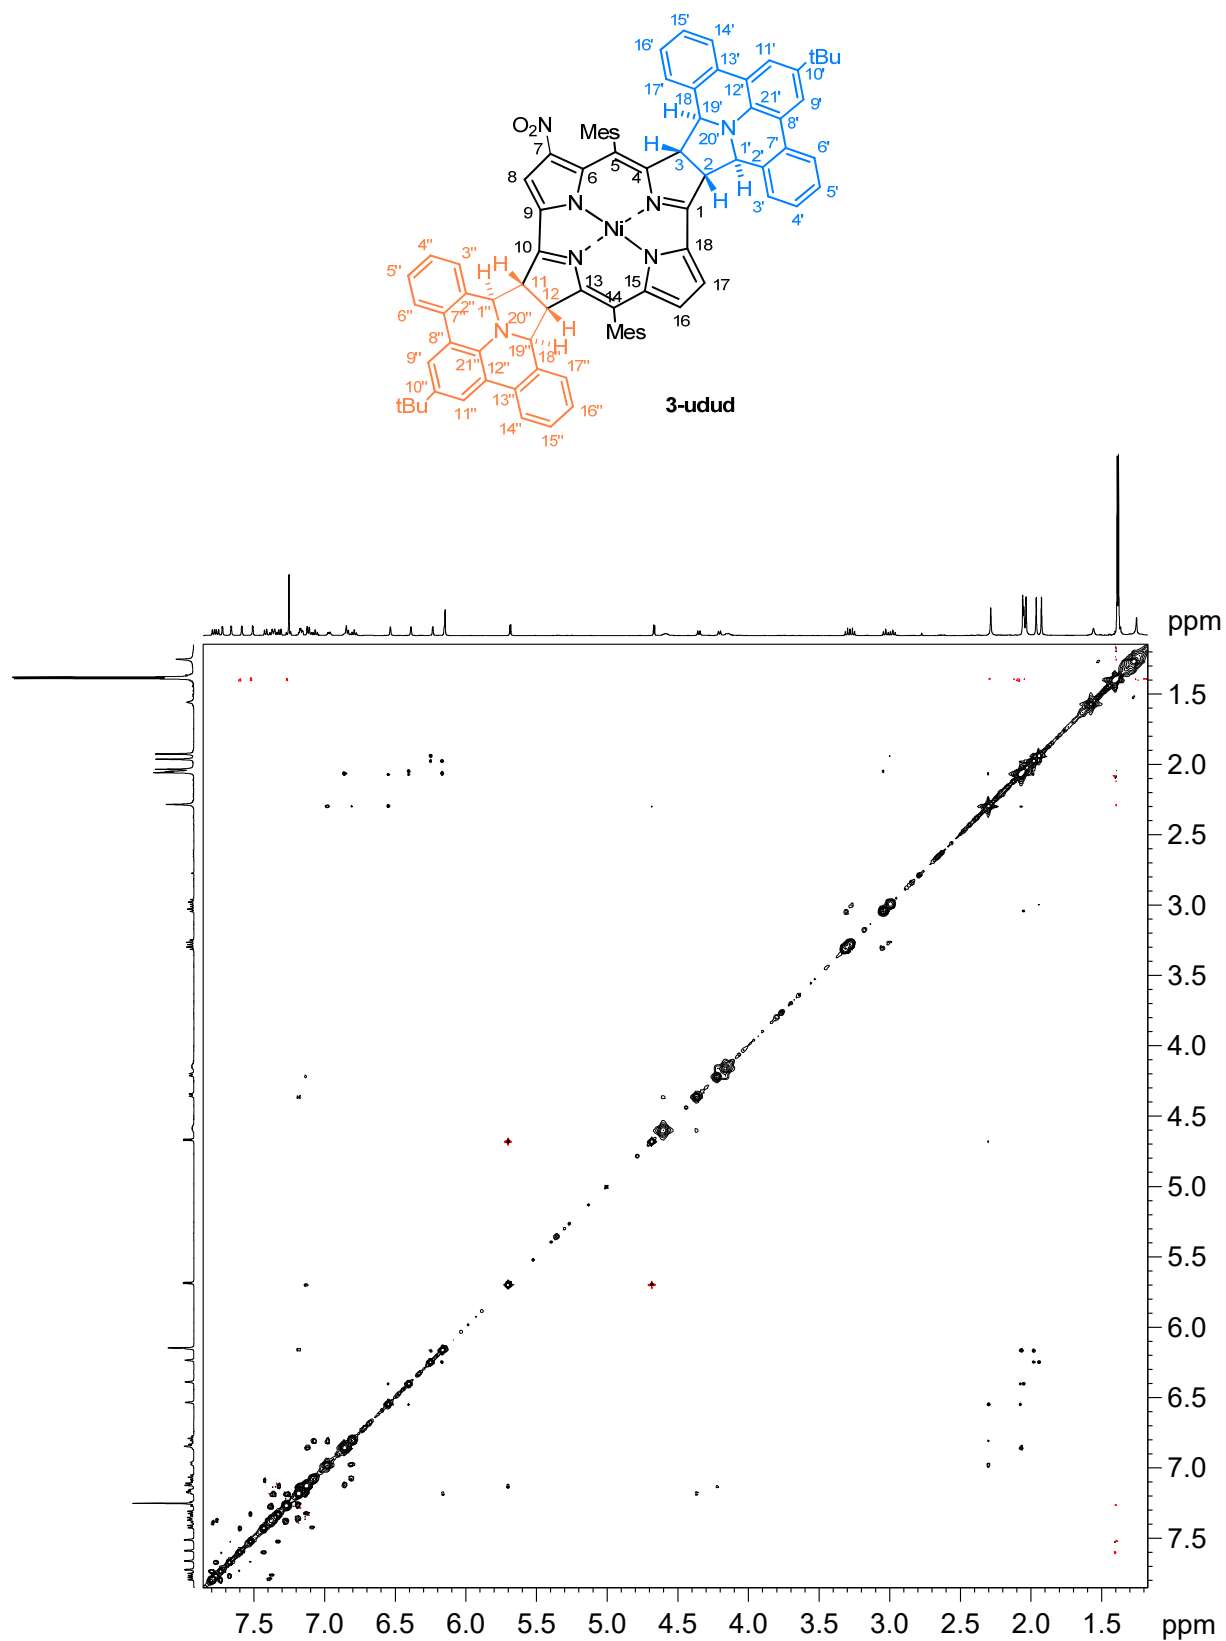

Figure S25.  $^1\text{H}$ ,  $^1\text{H}$  NOESY spectrum of **3-udud** (500 MHz, 298 K,  $\text{CDCl}_3$ ).

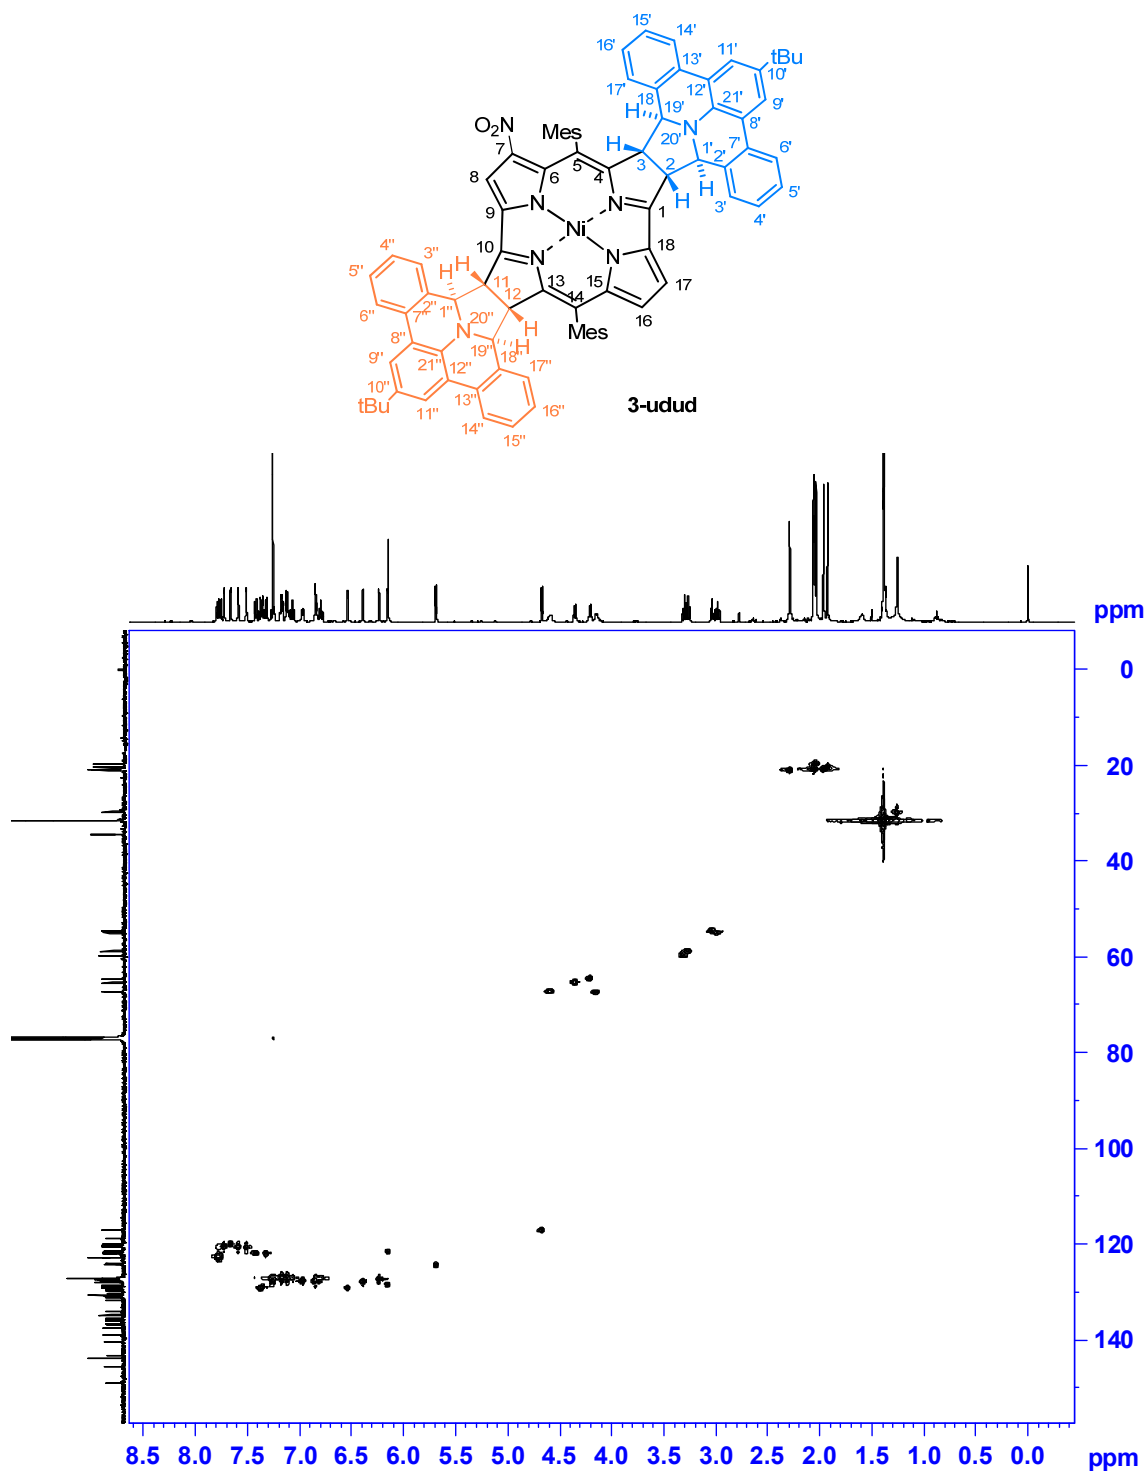

Figure S26. <sup>1</sup>H, <sup>13</sup>C HSQC spectrum of **3-udud** (500/125 MHz, 298 K, CDCl<sub>3</sub>).

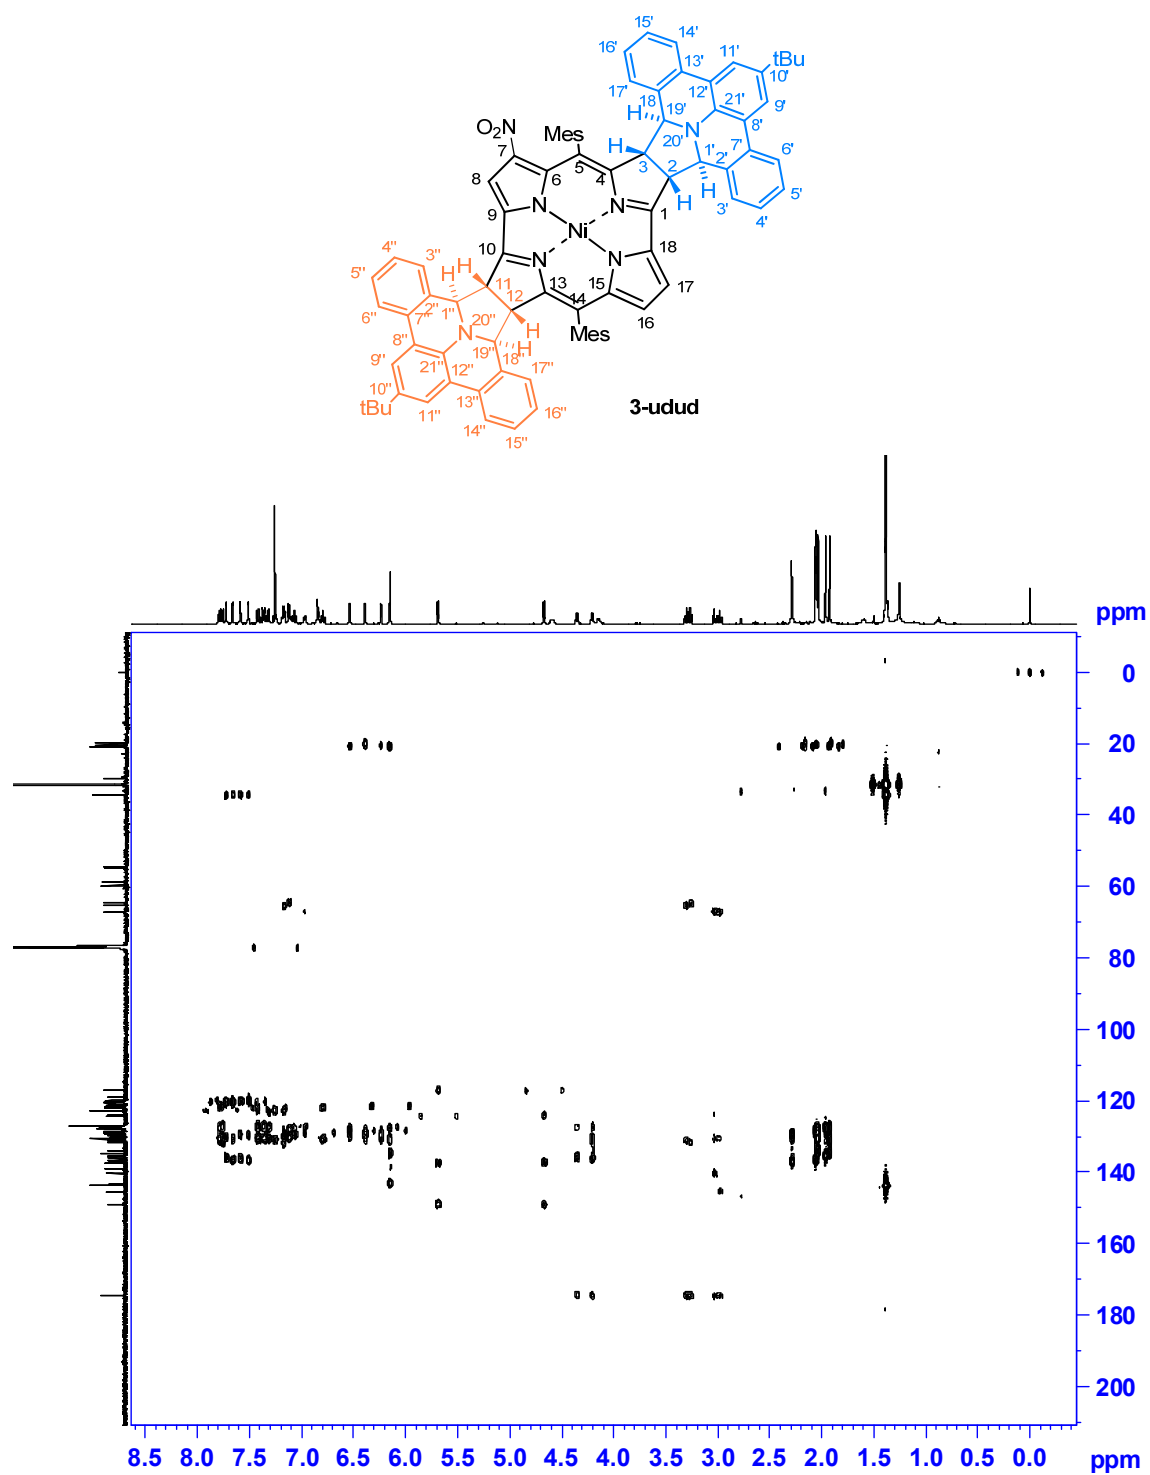

**Figure S27.**  $^1\text{H}$ ,  $^{13}\text{C}$  HMBC spectrum of **3-udud** (500/125 MHz, 298 K,  $\text{CDCl}_3$ ).

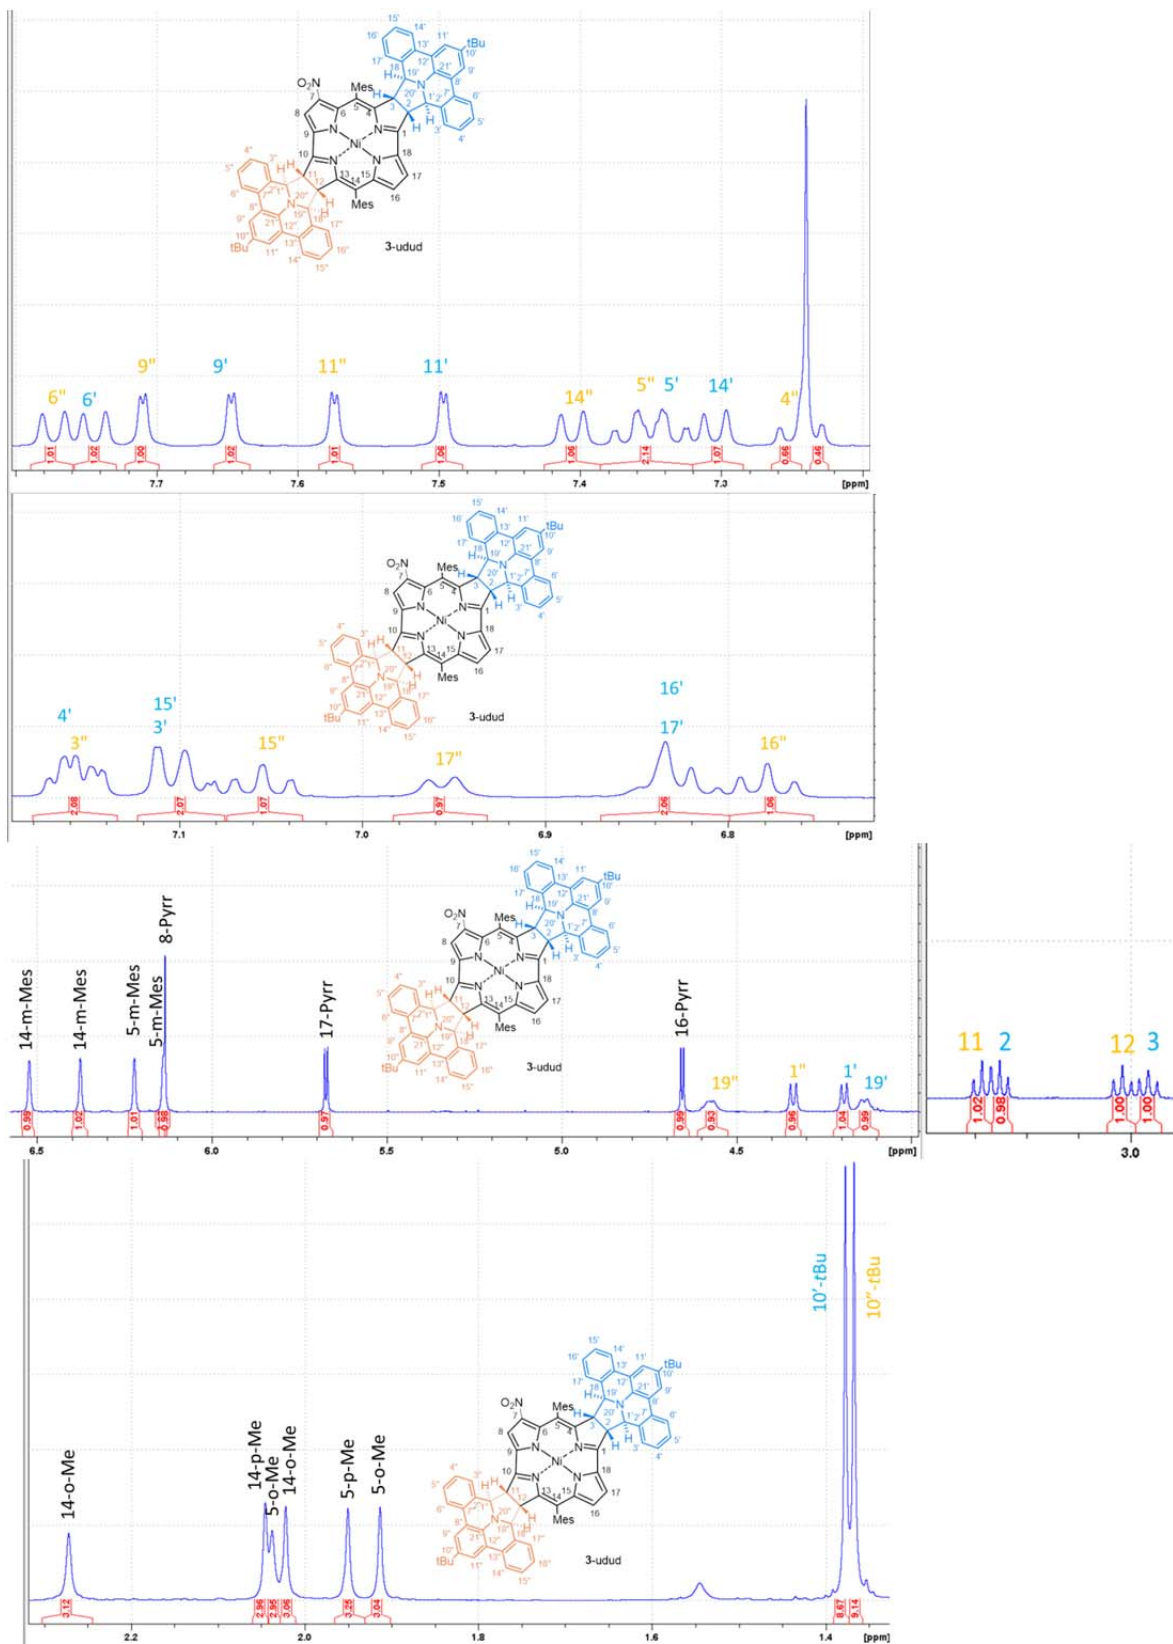

**Figure S28.** <sup>1</sup>H NMR signal assignments for **3-udud** (500 MHz, 298 K, CDCl<sub>3</sub>).

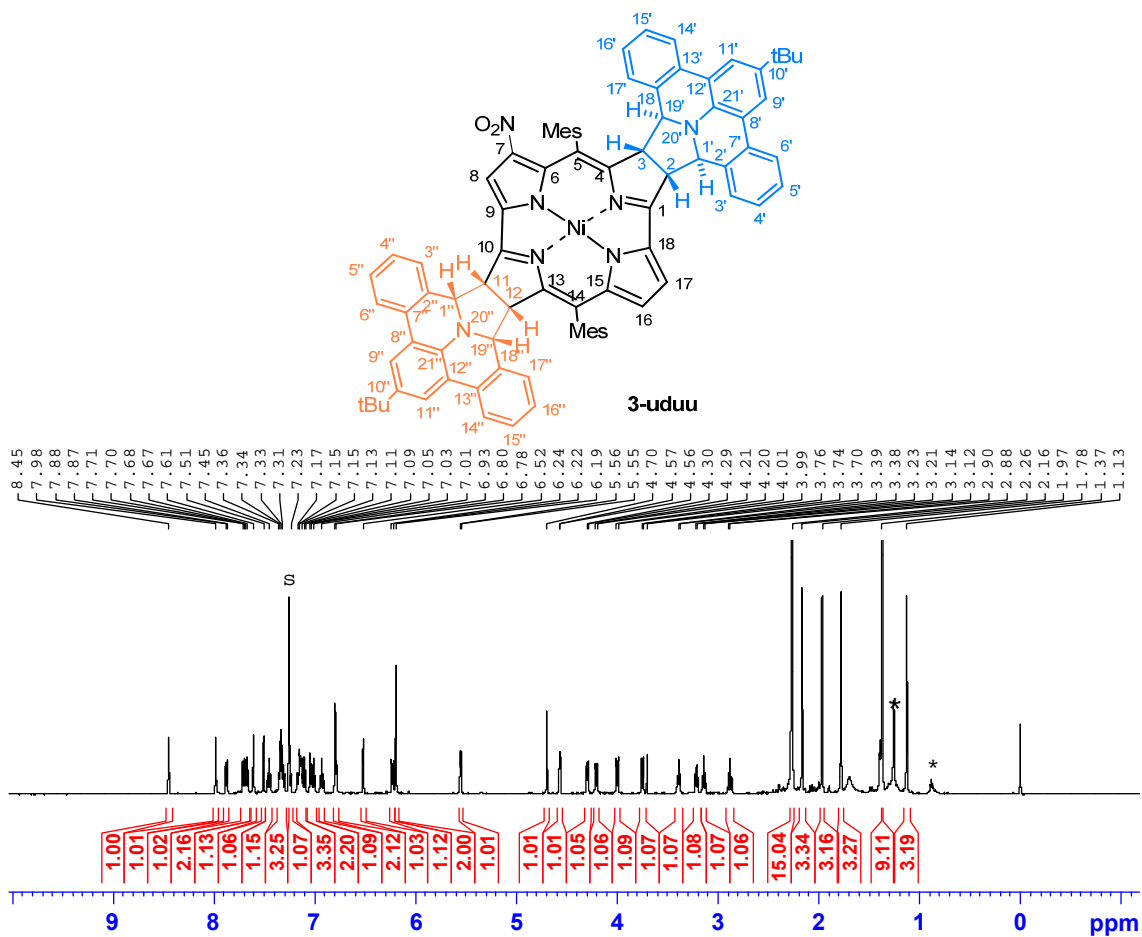

Figure S29. <sup>1</sup>H NMR spectrum of **3-uduu** (500 MHz, 298 K, CDCl<sub>3</sub>).

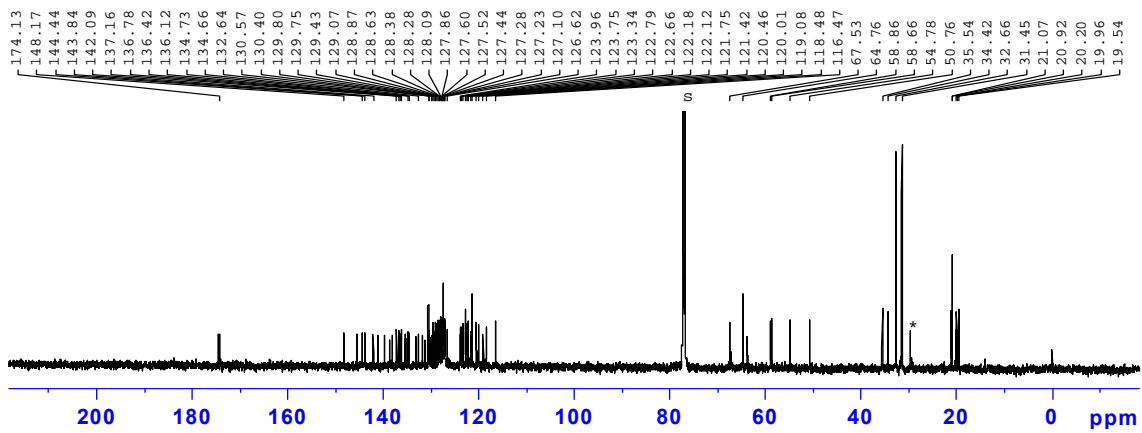

Figure S30. <sup>13</sup>C NMR spectrum of **3-uduu** (125 MHz, 298 K, CDCl<sub>3</sub>).

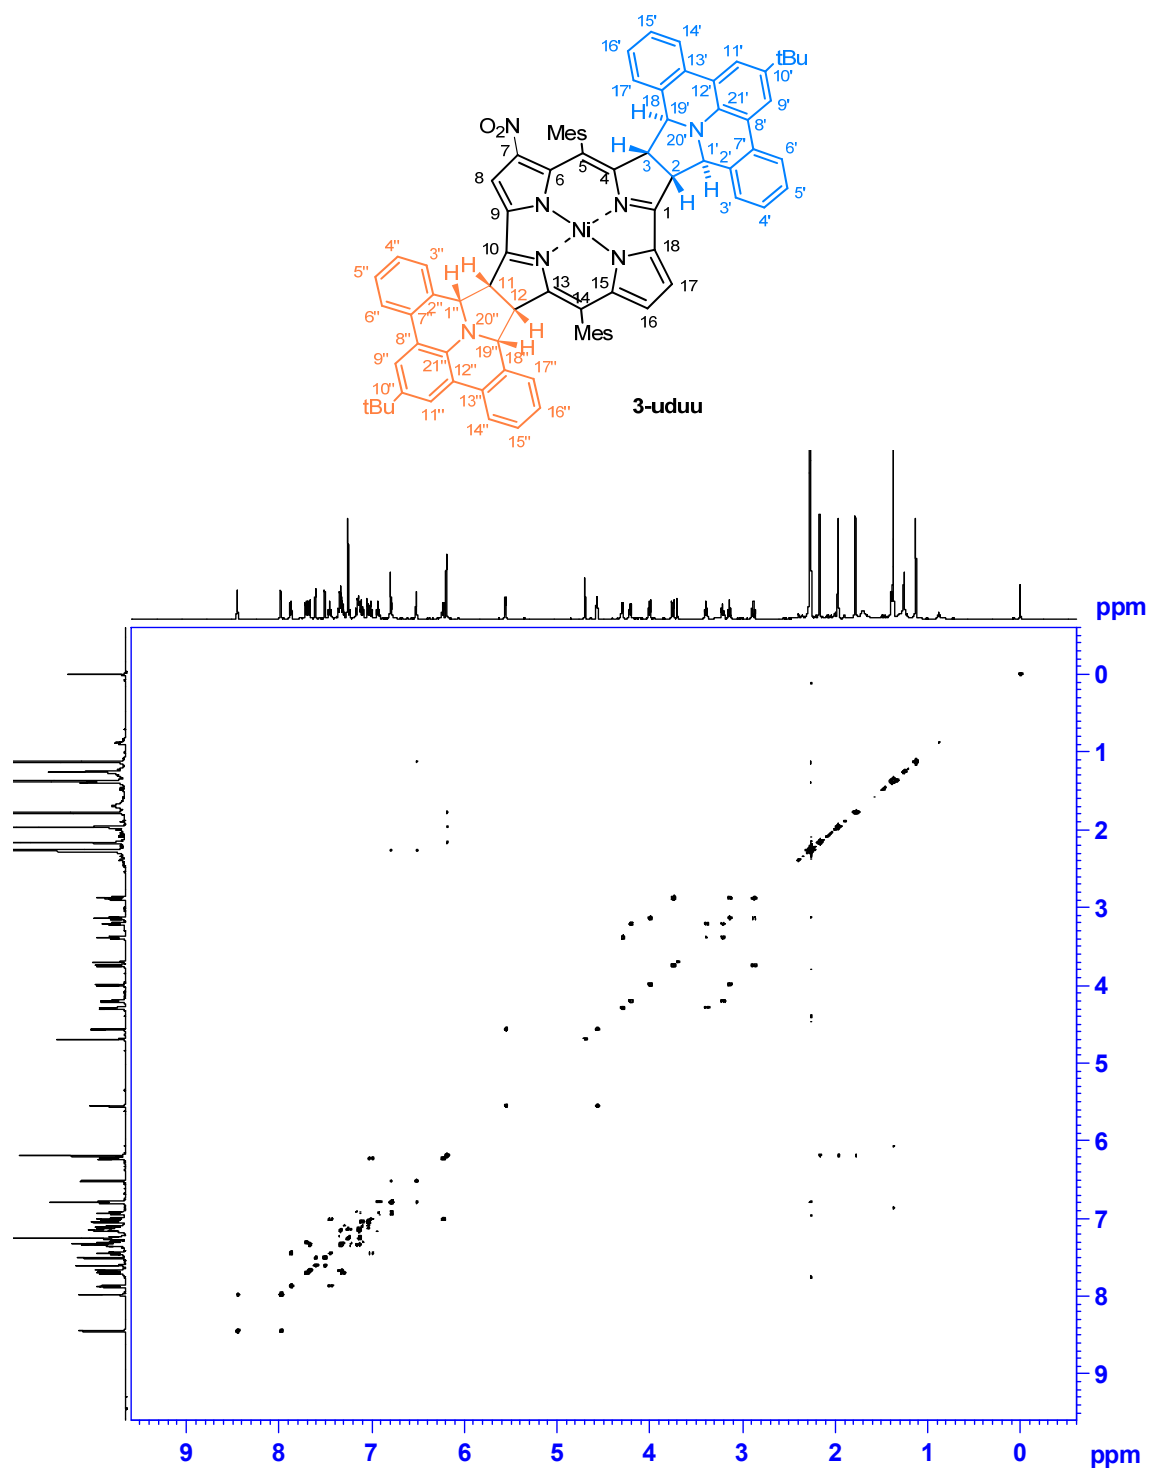

**Figure S31.**  $^1\text{H}$ ,  $^1\text{H}$  COSY spectrum of **3-uduu** (500 MHz, 298 K,  $\text{CDCl}_3$ ).

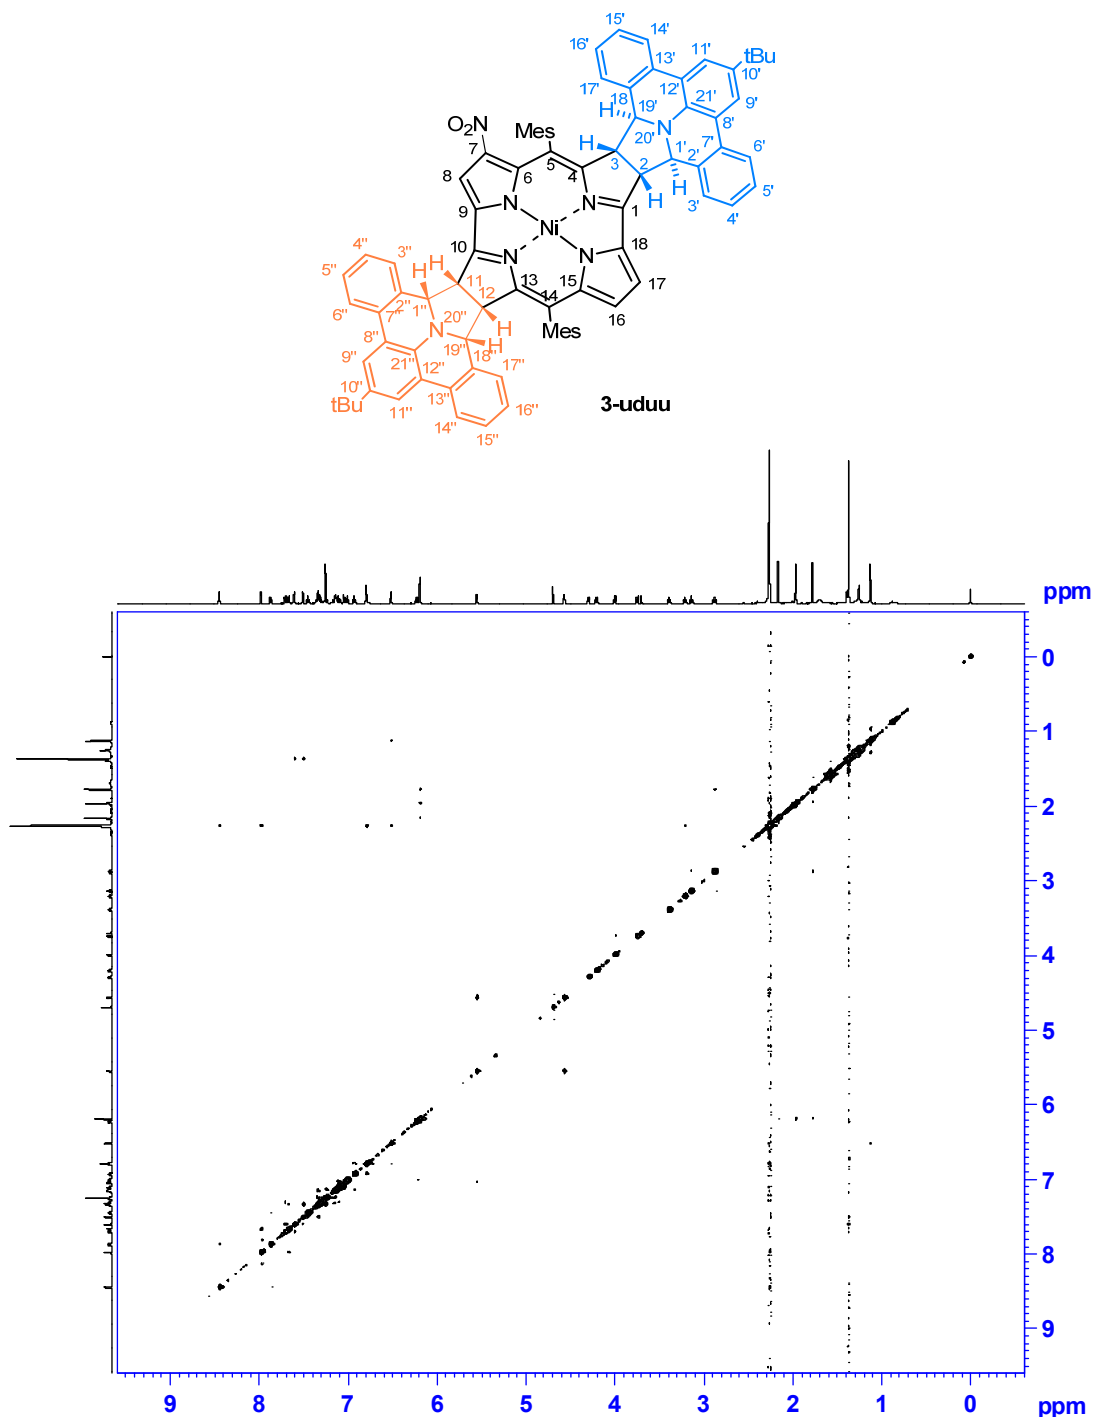

**Figure S32.**  $^1\text{H}$ ,  $^1\text{H}$  NOESY spectrum of **3-uduu** (500 MHz, 298 K,  $\text{CDCl}_3$ ).



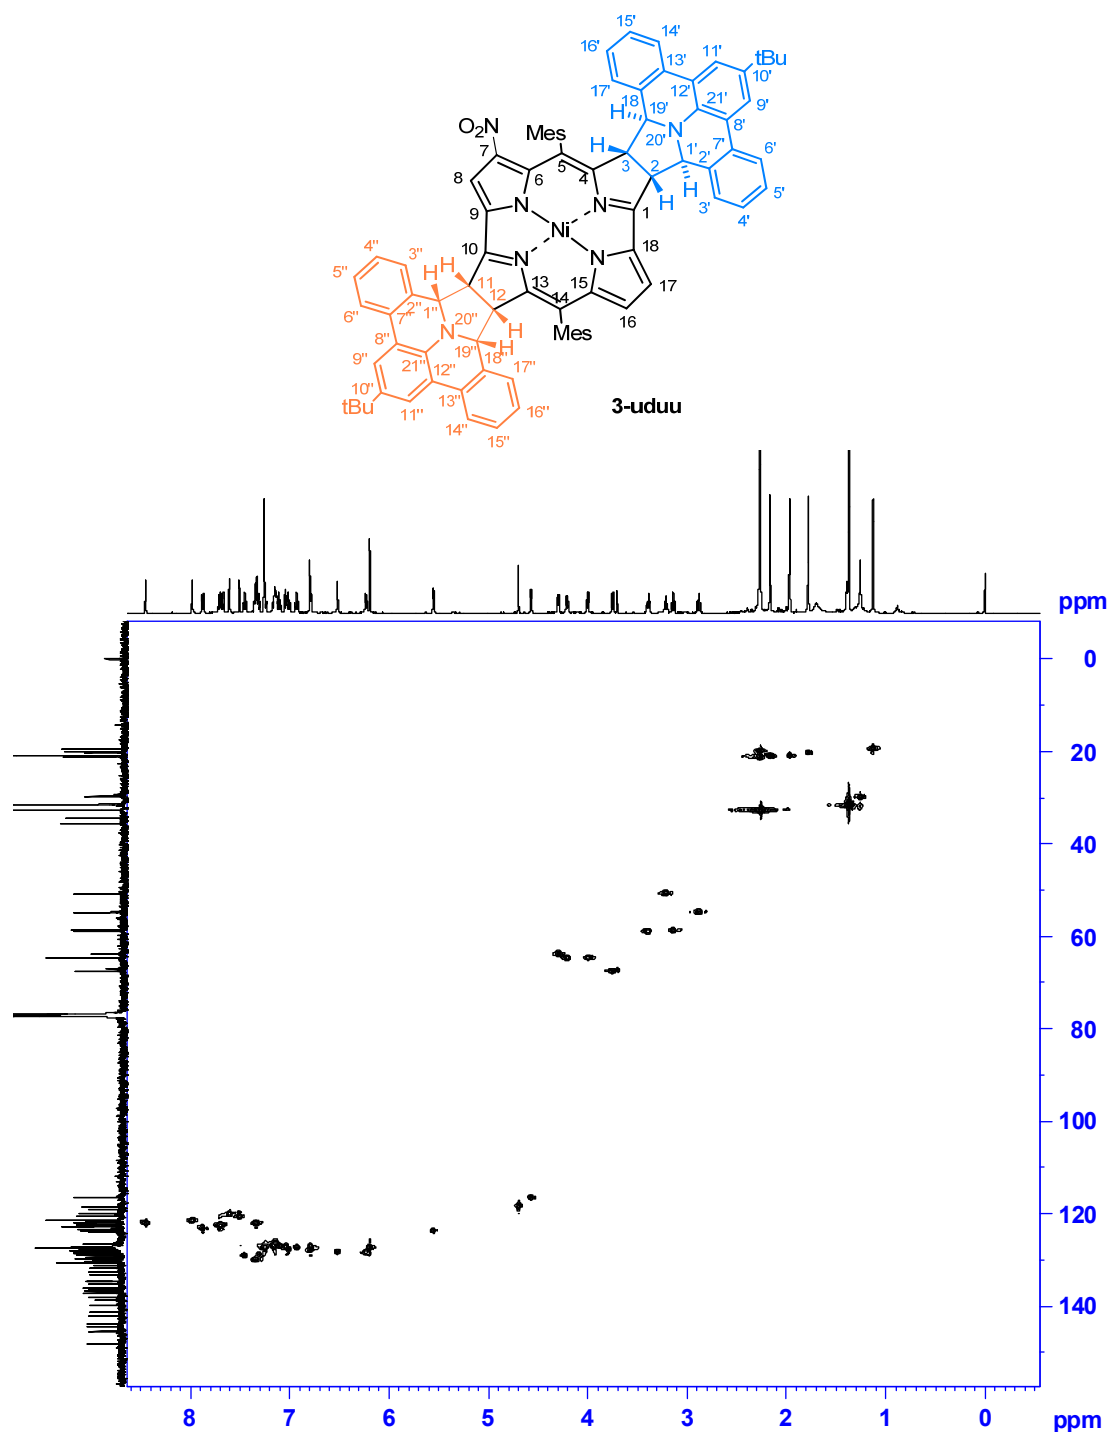

**Figure S33.**  $^1\text{H}$ ,  $^{13}\text{C}$  HSQC spectrum of **3-uduu** (500/125 MHz, 298 K,  $\text{CDCl}_3$ ).

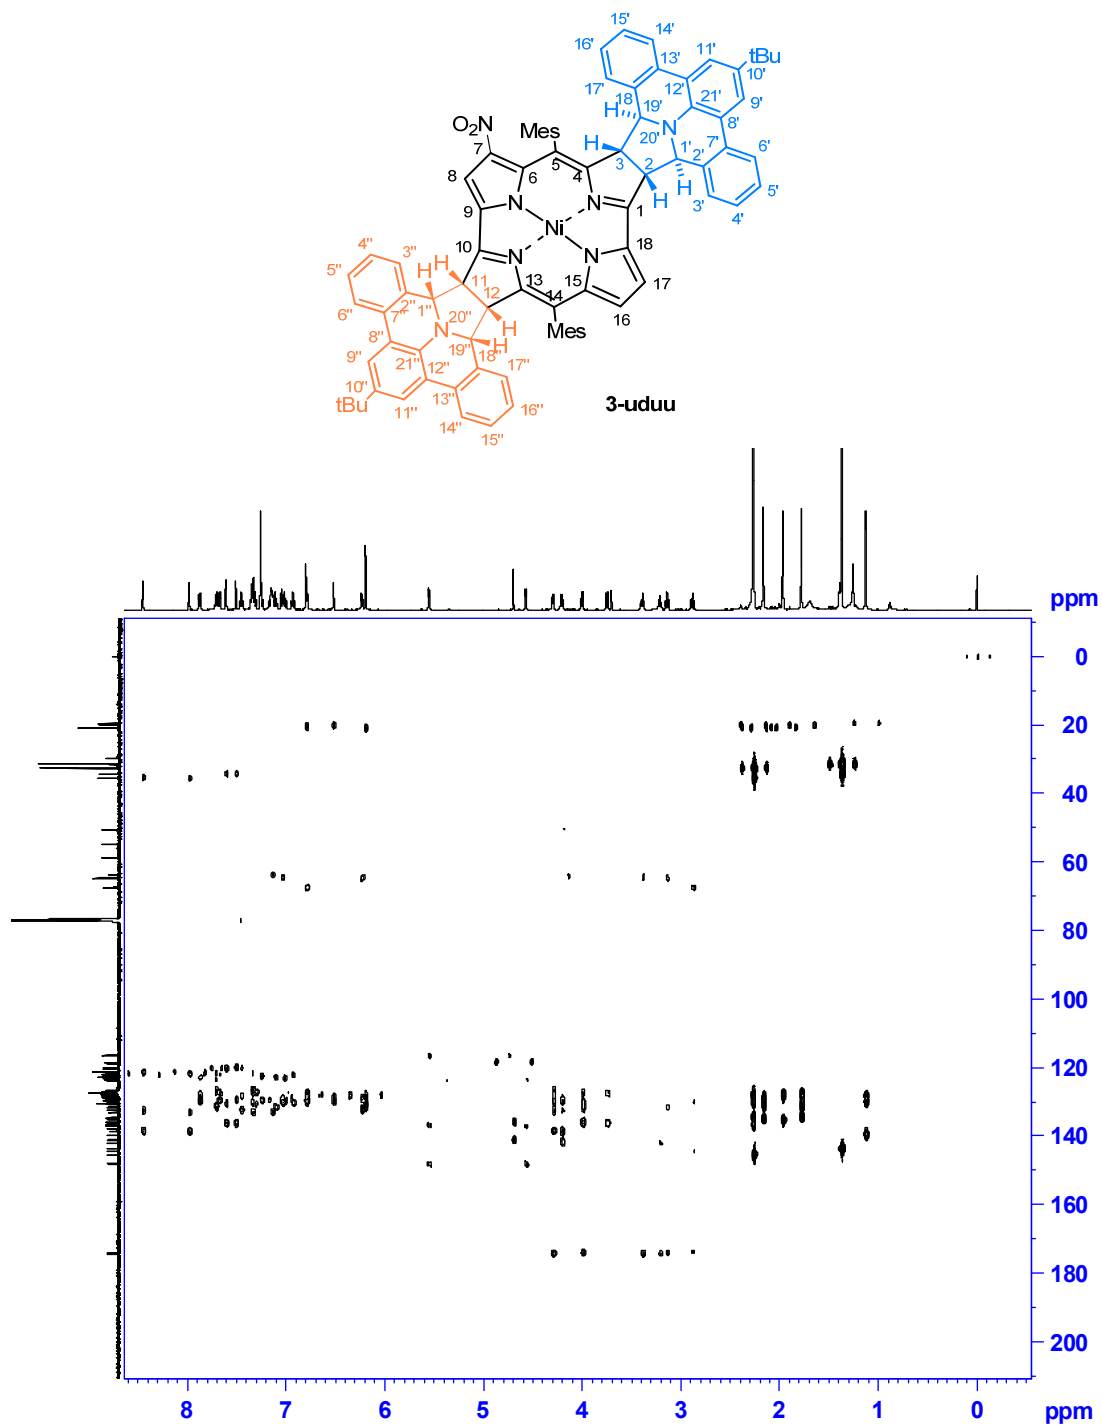

**Figure S34.**  $^1\text{H}$ ,  $^{13}\text{C}$  HMBC spectrum of **3-uduu** (500/125 MHz, 298 K,  $\text{CDCl}_3$ ).

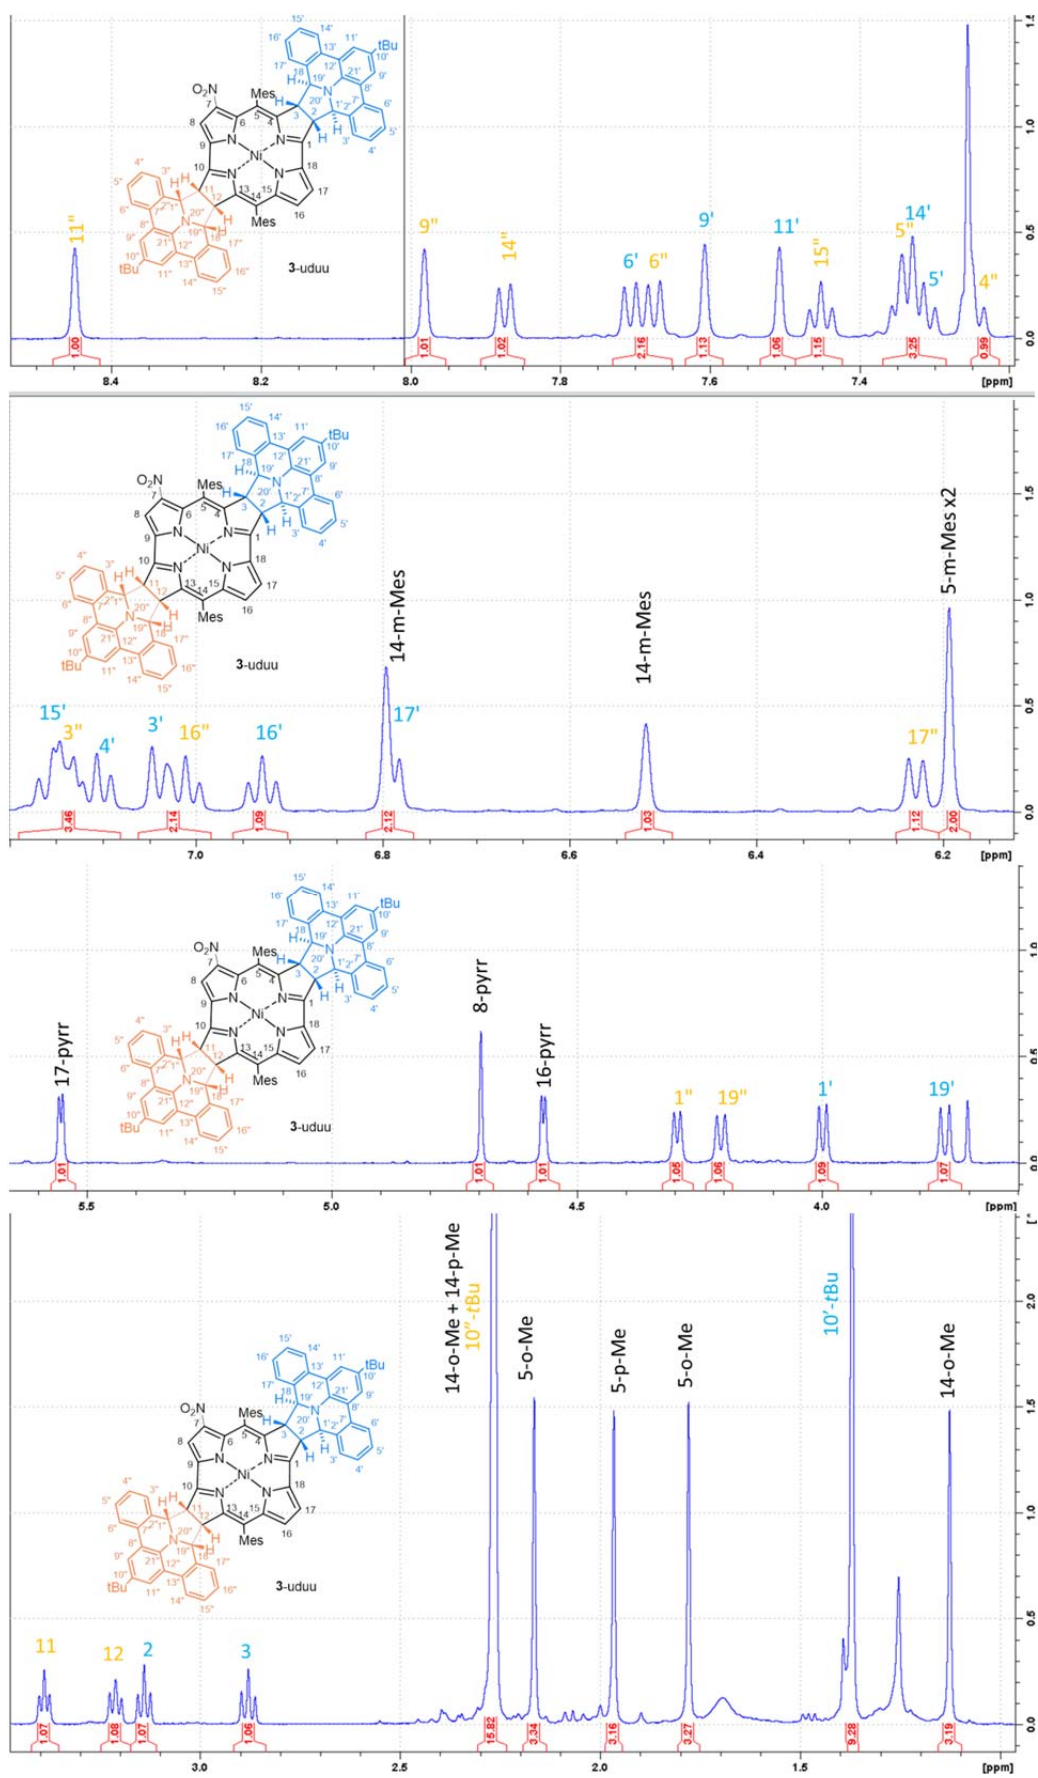

Figure S35. <sup>1</sup>H NMR signal assignments for 3-uduu (500 MHz, 298 K, CDCl<sub>3</sub>).

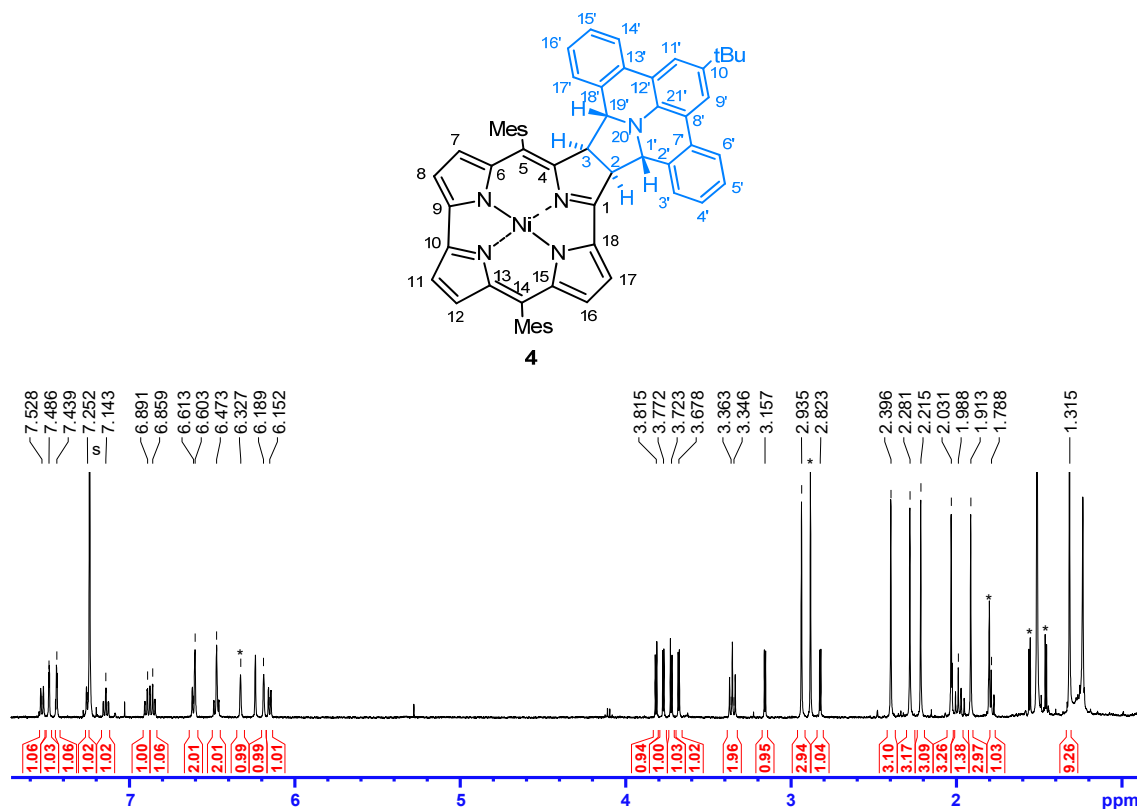

**Figure S36.**  $^1\text{H}$  NMR spectrum of **4** (500 MHz, 298 K,  $\text{CDCl}_3$ ). The signals of starting **1-H** were indicated with asterisks. The signals of contaminating **1-H** (retro-cycloaddition product) were indicated with asterisks.

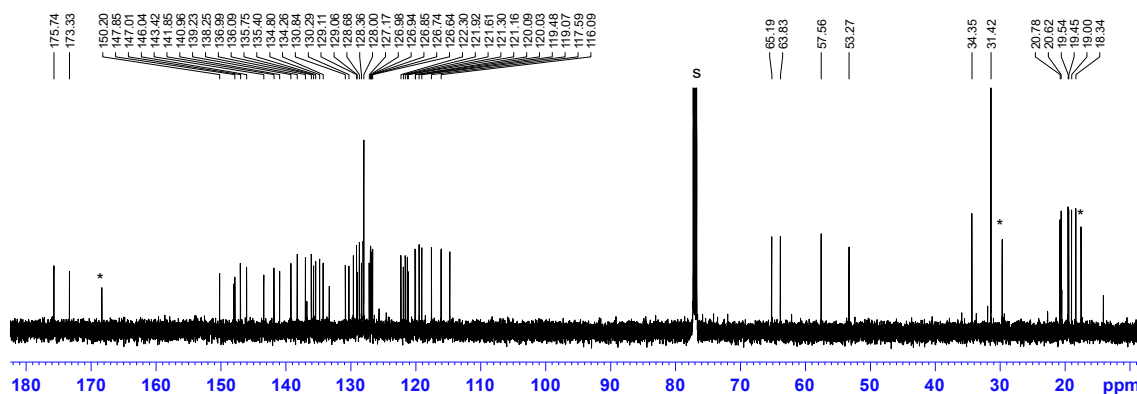

**Figure S37.**  $^{13}\text{C}$  NMR spectrum of **4** (125 MHz, 298 K,  $\text{CDCl}_3$ ). The signals of contaminating **1-H** (retro-cycloaddition product) were indicated with asterisks.

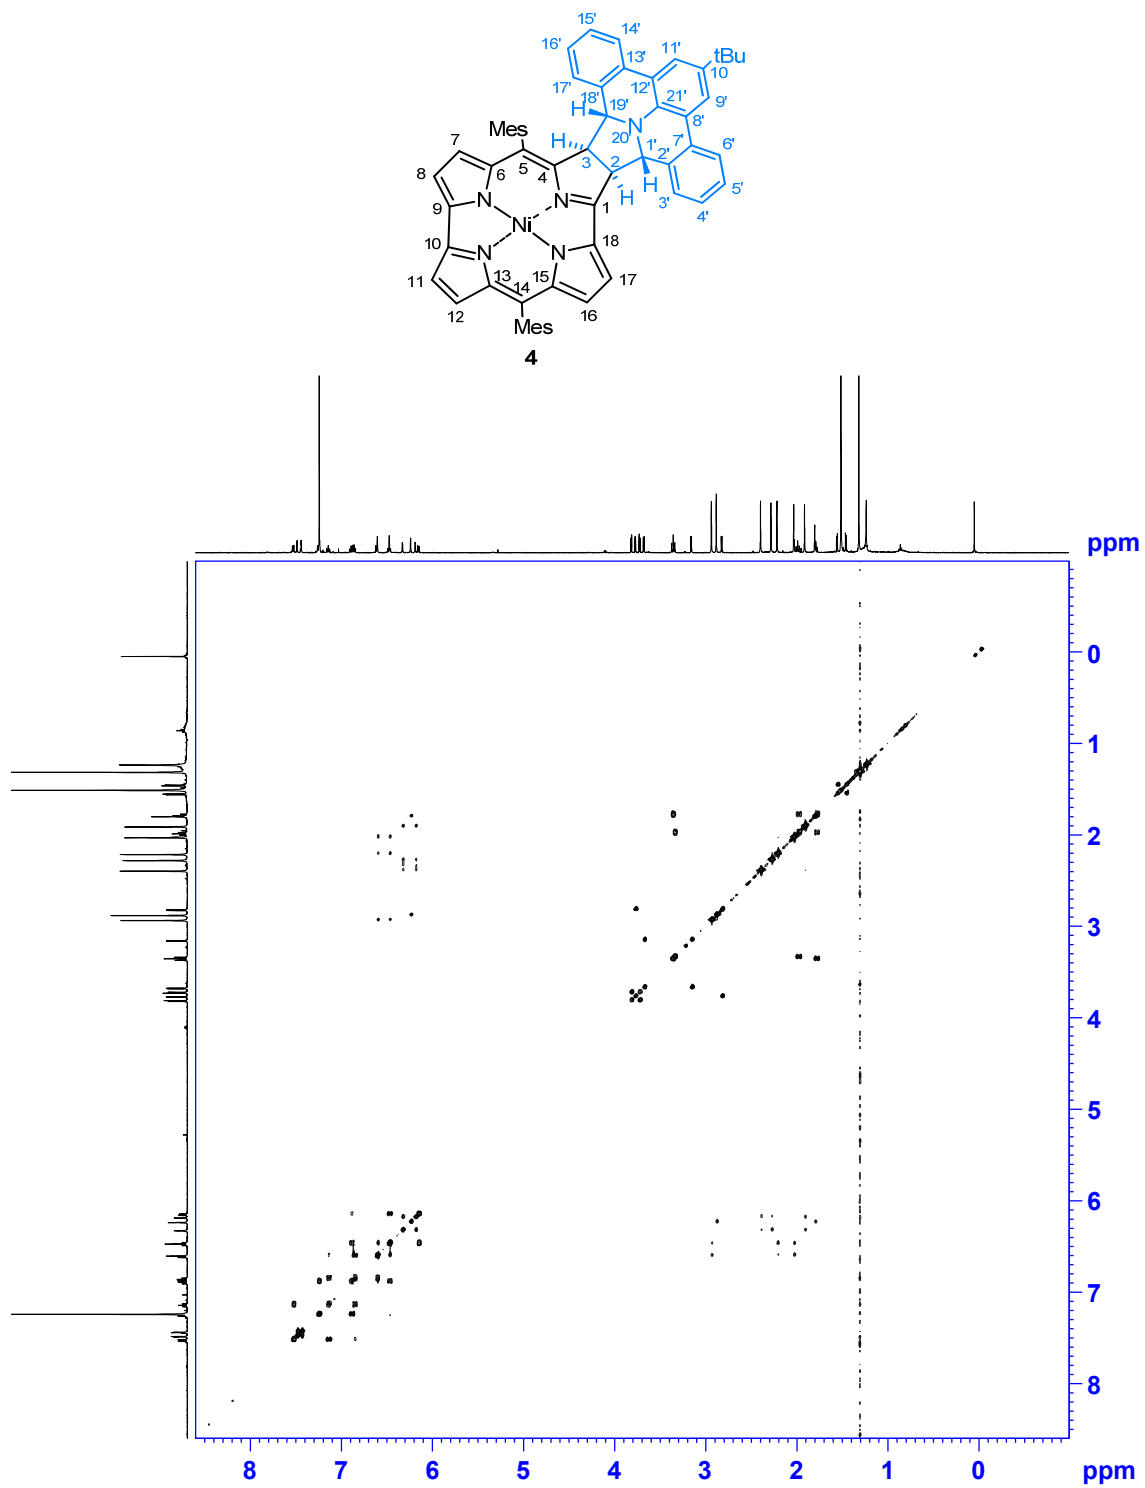

**Figure S38.**  $^1\text{H}$ ,  $^1\text{H}$  COSY spectrum of **4** (500 MHz, 298 K,  $\text{CDCl}_3$ ).

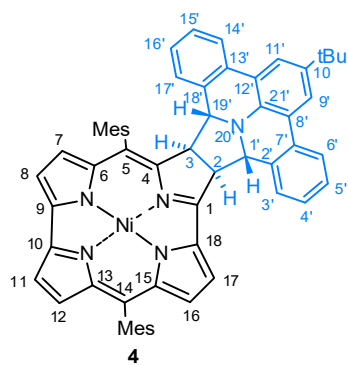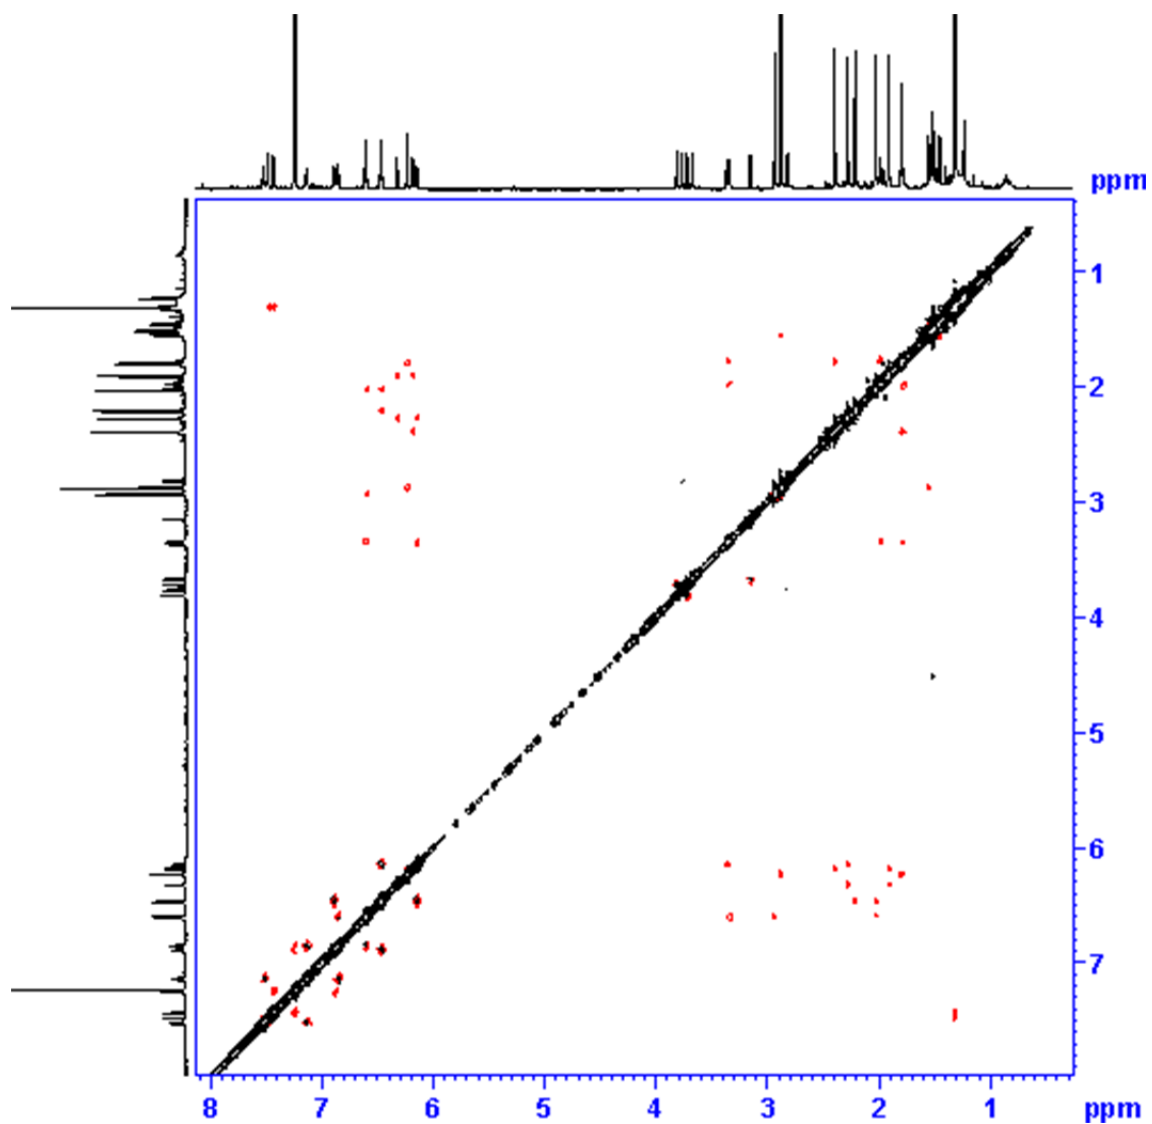

Figure S39.  $^1\text{H}$ ,  $^1\text{H}$  NOESY spectrum of **4** (600 MHz, 298 K,  $\text{CDCl}_3$ ).

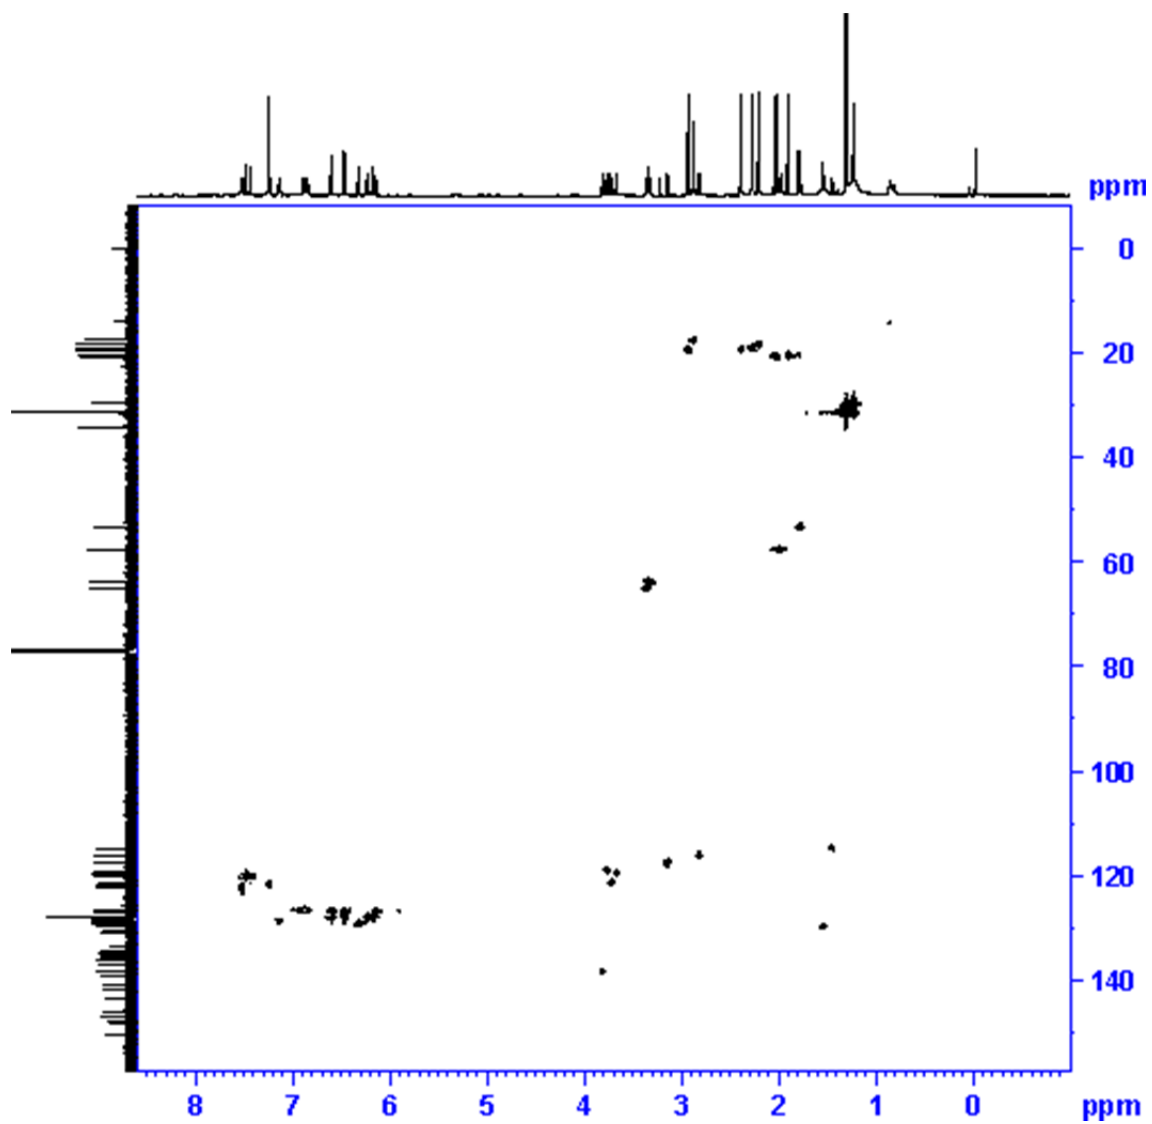

**Figure S40.**  $^1\text{H}$ ,  $^{13}\text{C}$  HSQC spectrum of **4** (500/125 MHz, 298 K,  $\text{CDCl}_3$ ).

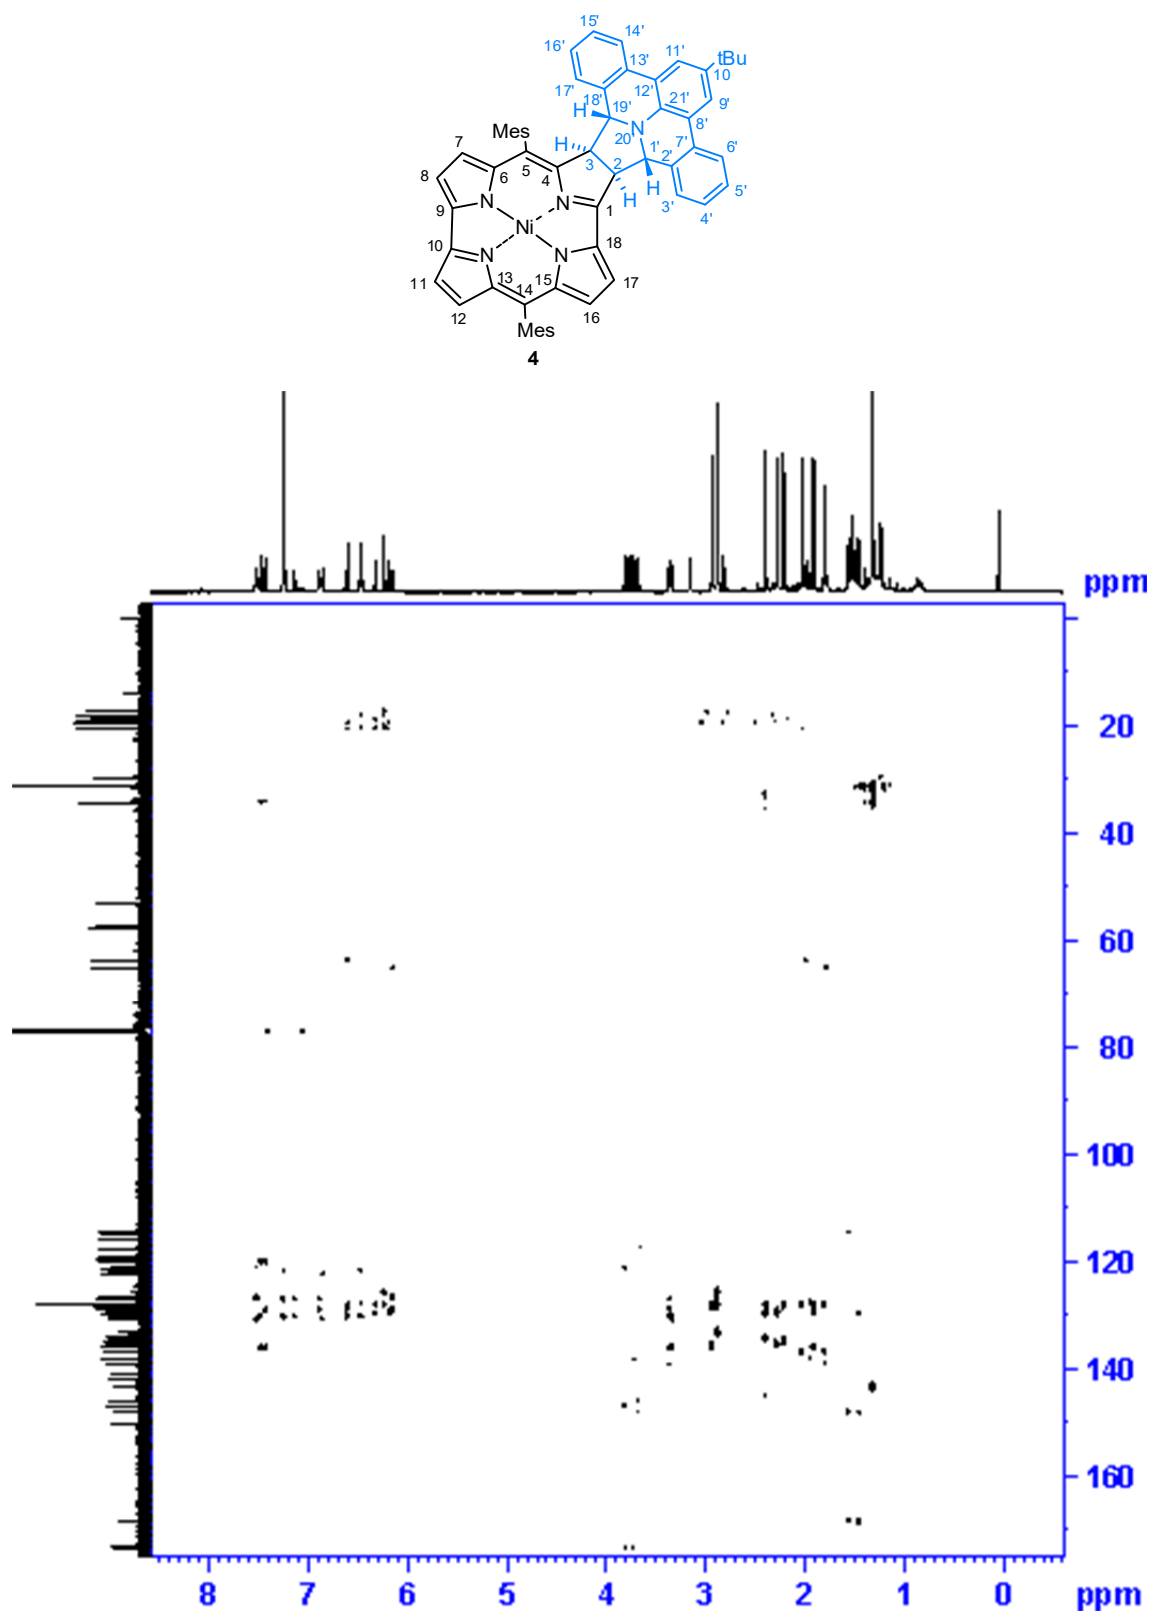

**Figure S41.**  $^1\text{H}$ ,  $^{13}\text{C}$  HMBC spectrum of **4** (600/150 MHz, 298 K,  $\text{CDCl}_3$ ).



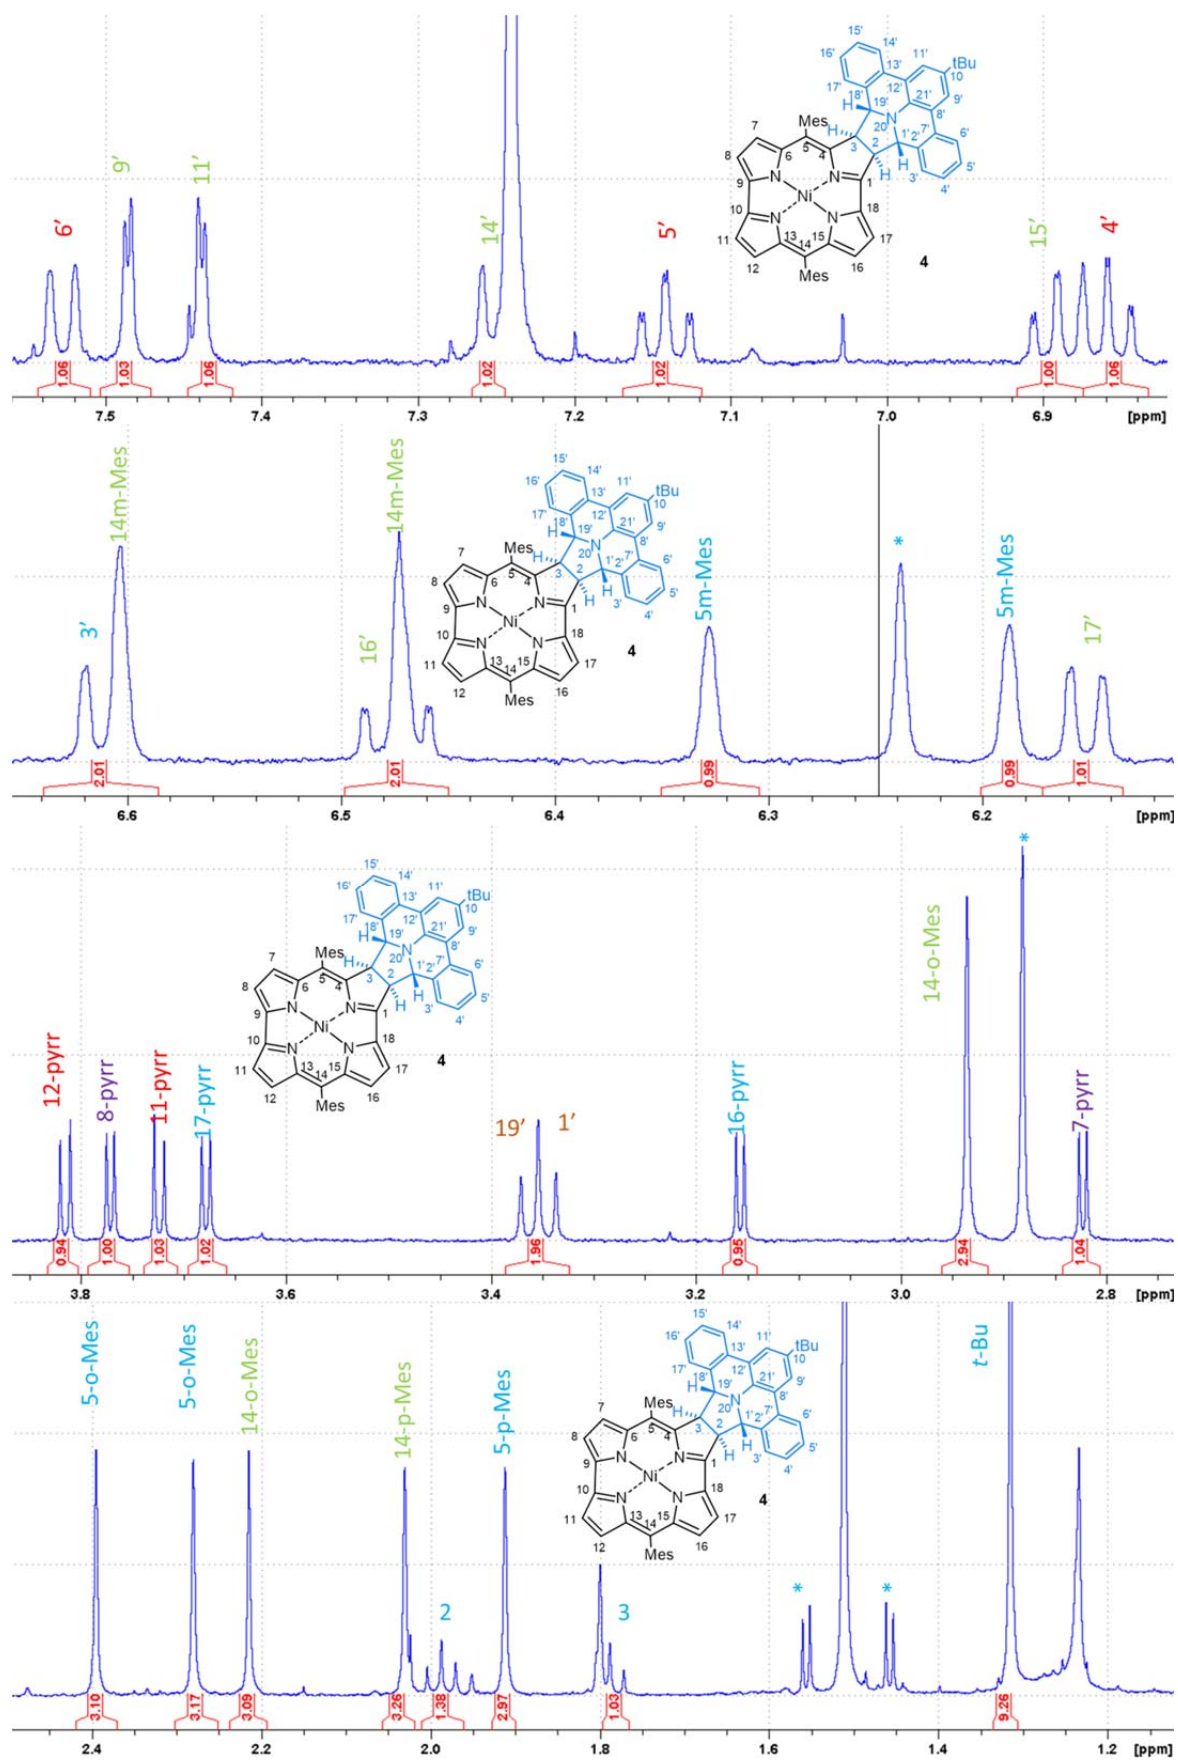

**Figure S42.** <sup>1</sup>H NMR signal assignments for **4** (500 MHz, 298 K, CDCl<sub>3</sub>). The signals of contaminating 1-H (retro-cycloaddition product) were indicated with asterisks.

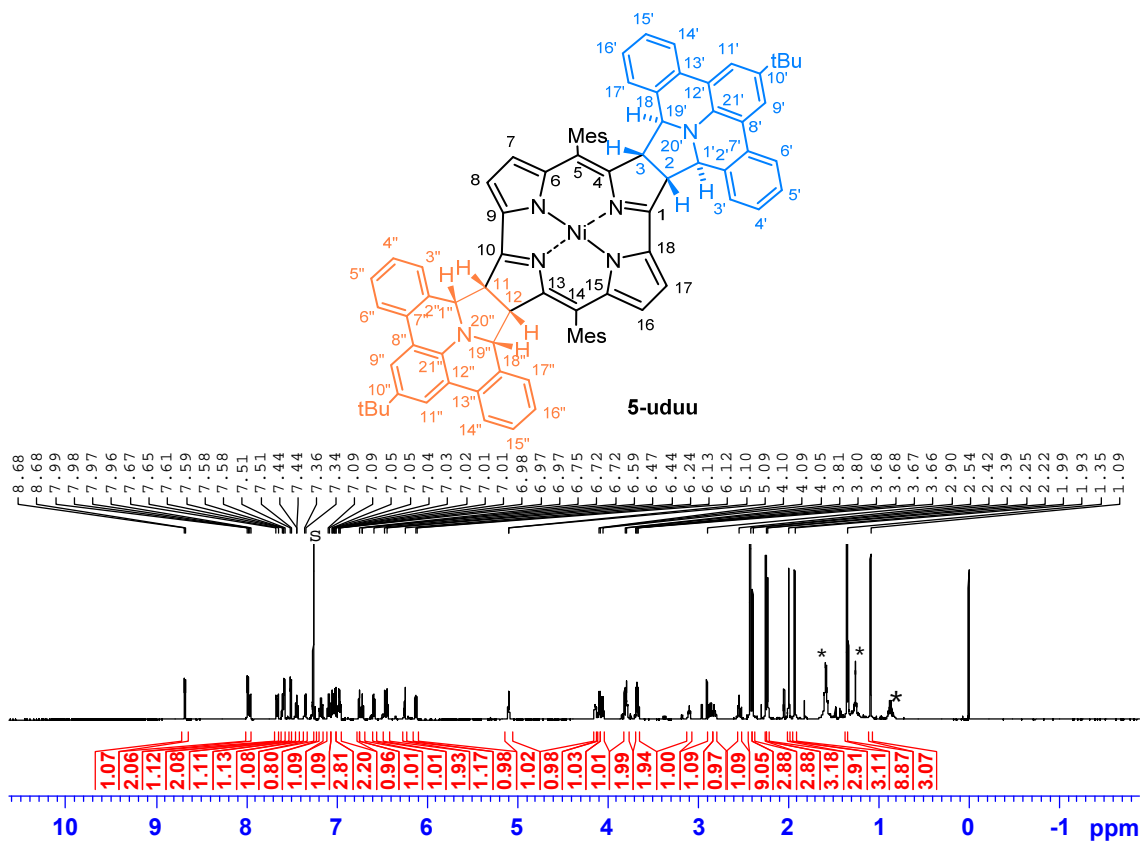

Figure S43. <sup>1</sup>H NMR spectrum of 5-uduu (500 MHz, 298 K, CDCl<sub>3</sub>).

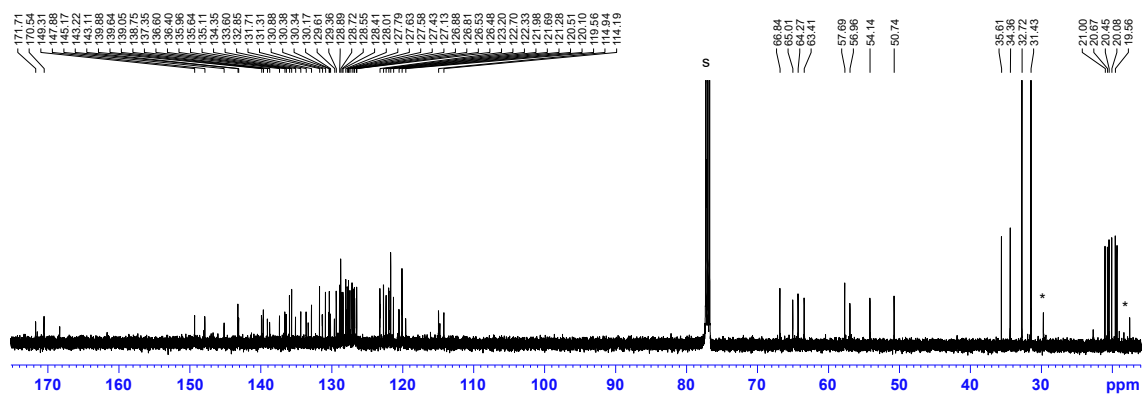

Figure S44. <sup>13</sup>C NMR spectrum of 5-uduu (125 MHz, 298 K, CDCl<sub>3</sub>).

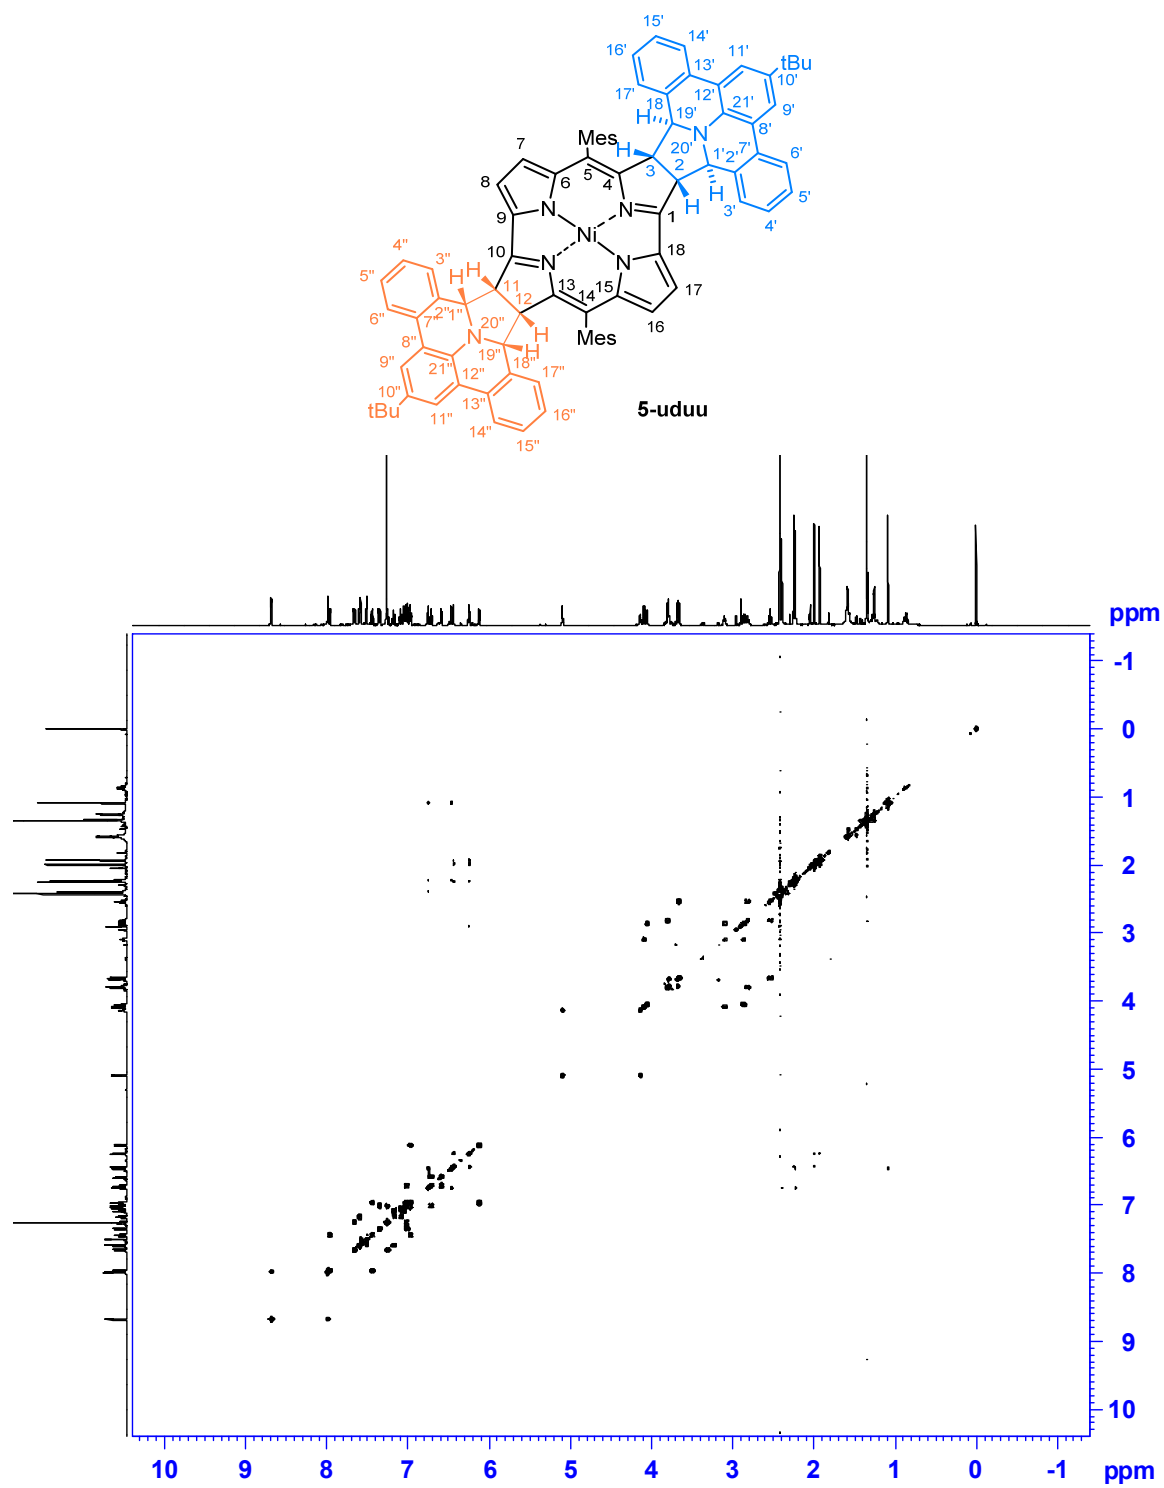

Figure S45.  $^1\text{H}$ ,  $^1\text{H}$  COSY spectrum of 5-uduu (500 MHz, 298 K,  $\text{CDCl}_3$ ).

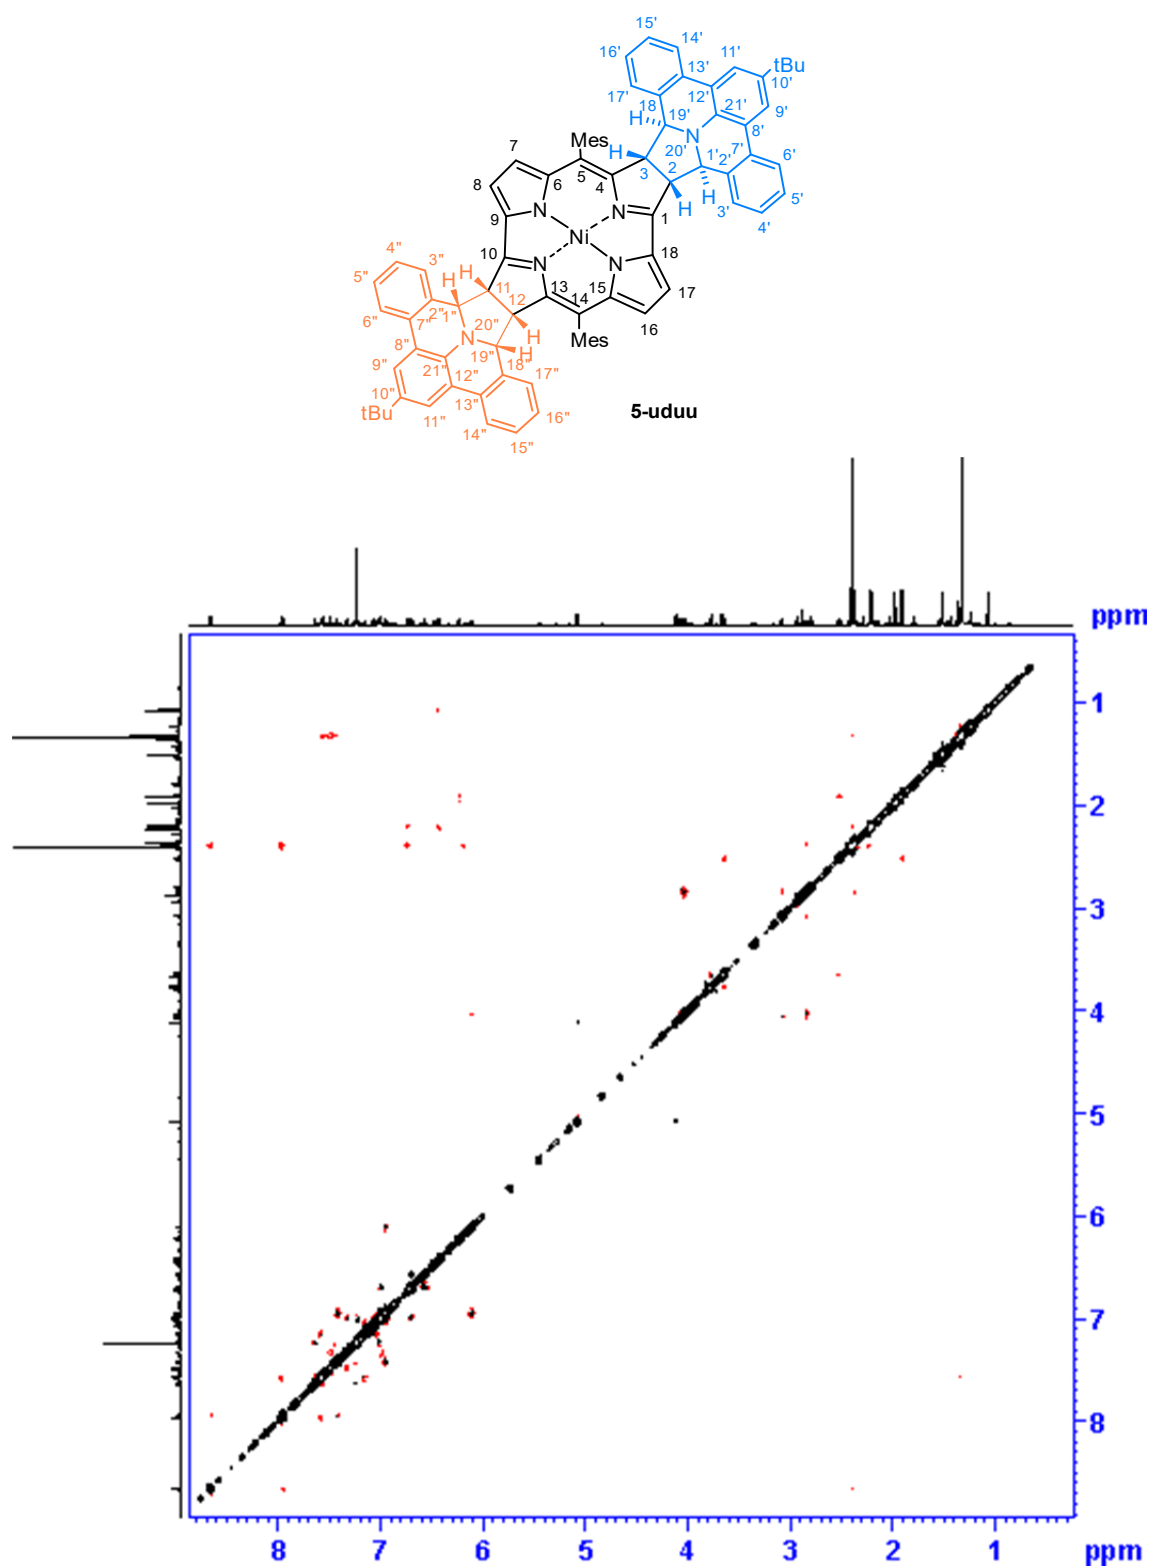

**Figure S46.**  $^1\text{H}$ ,  $^1\text{H}$  NOESY spectrum of **5-uduu** (600 MHz, 298 K,  $\text{CDCl}_3$ ).

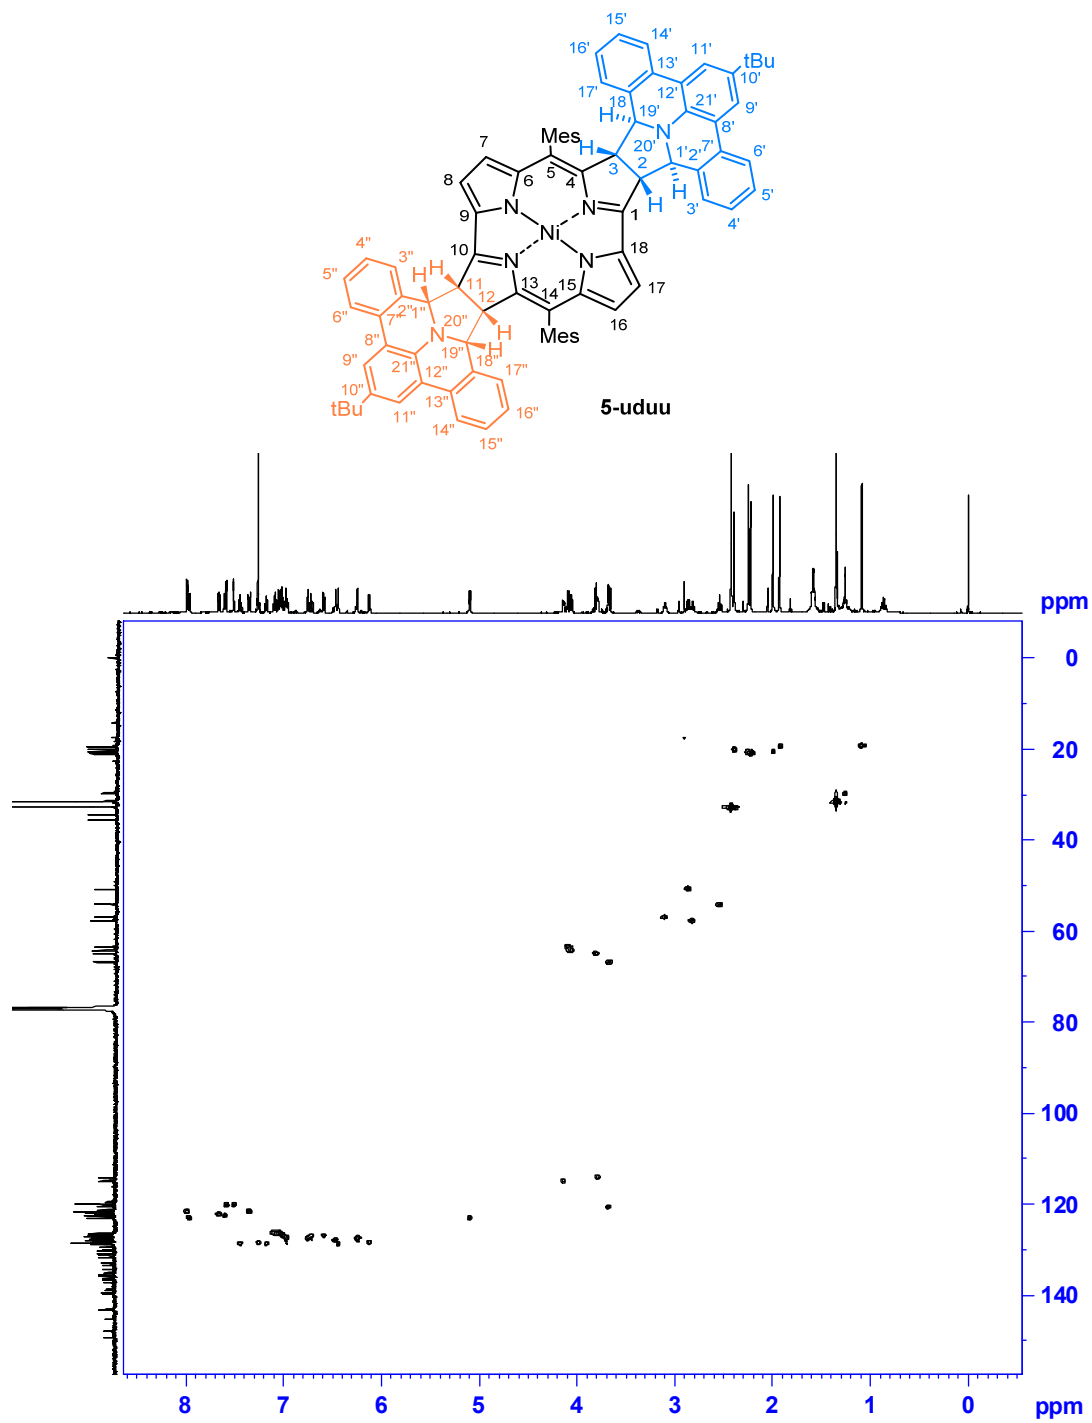

**Figure S47.**  $^1\text{H}$ ,  $^{13}\text{C}$  HSQC spectrum of **5-uduu** (500/125 MHz, 298 K,  $\text{CDCl}_3$ ).

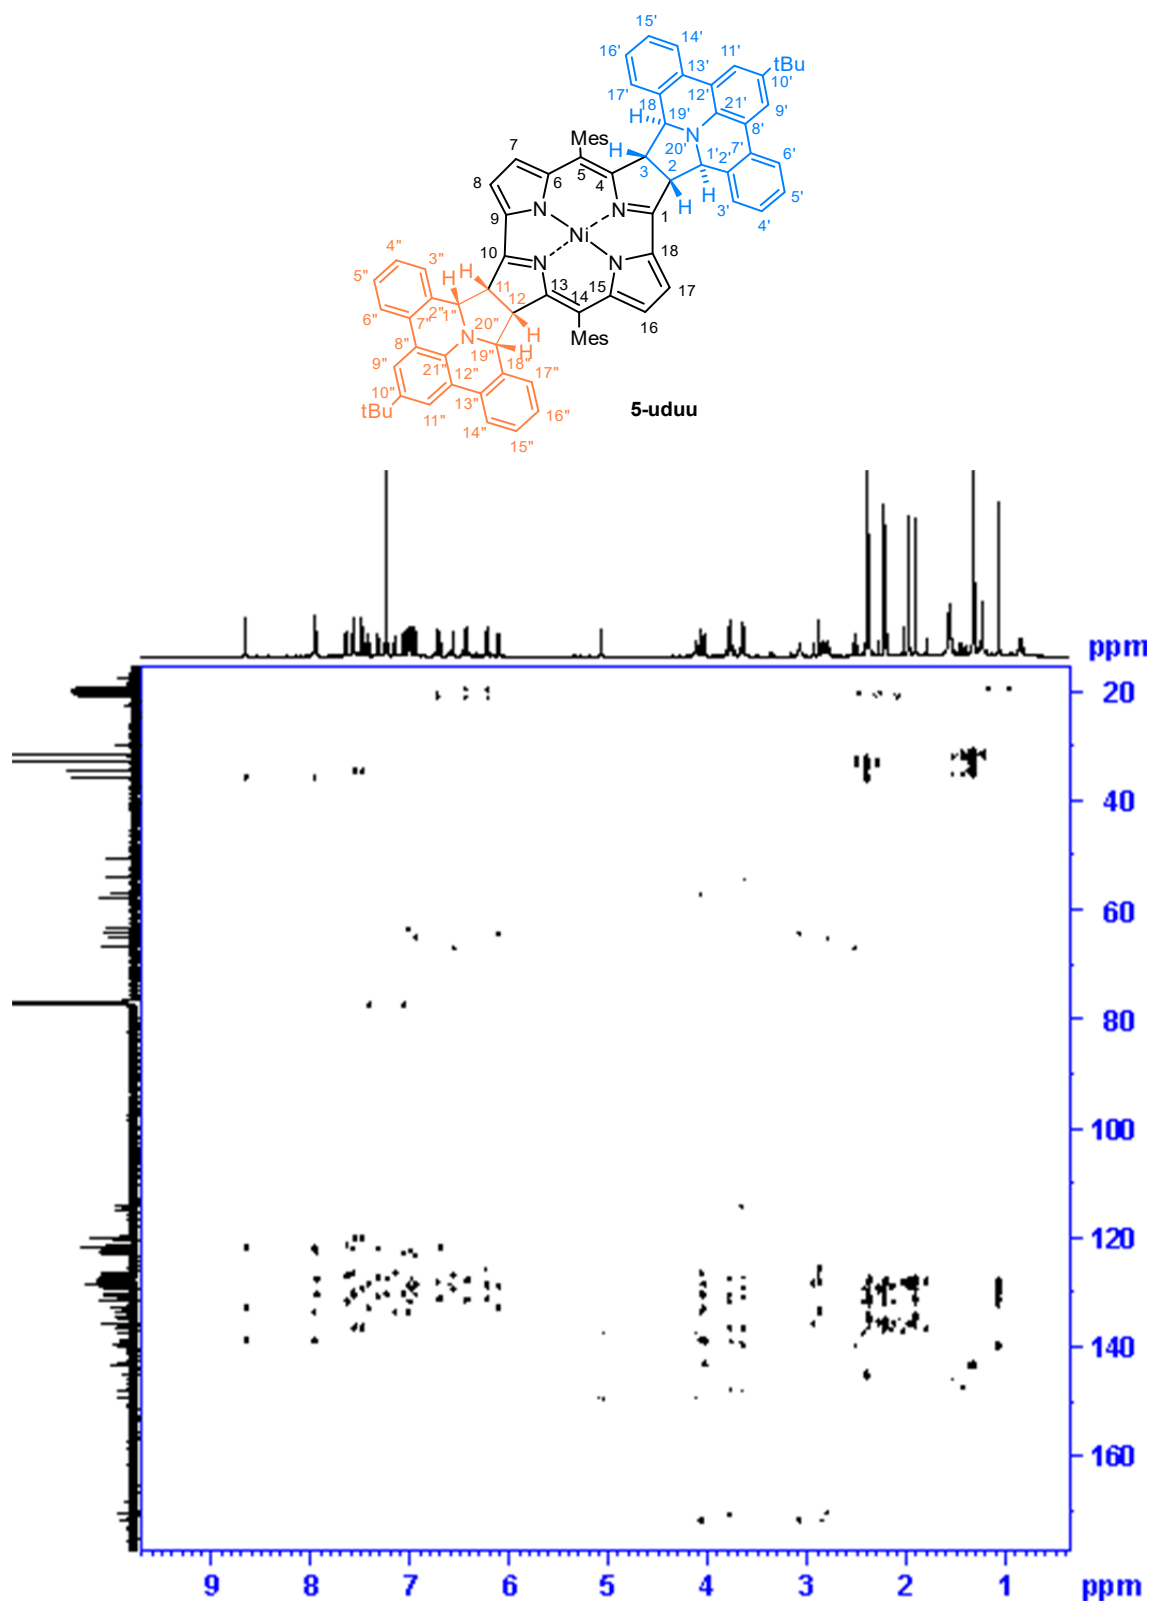

Figure S48.  $^1\text{H}$ ,  $^{13}\text{C}$  HMBC spectrum of 5-uduu (600/150 MHz, 298 K,  $\text{CDCl}_3$ ).

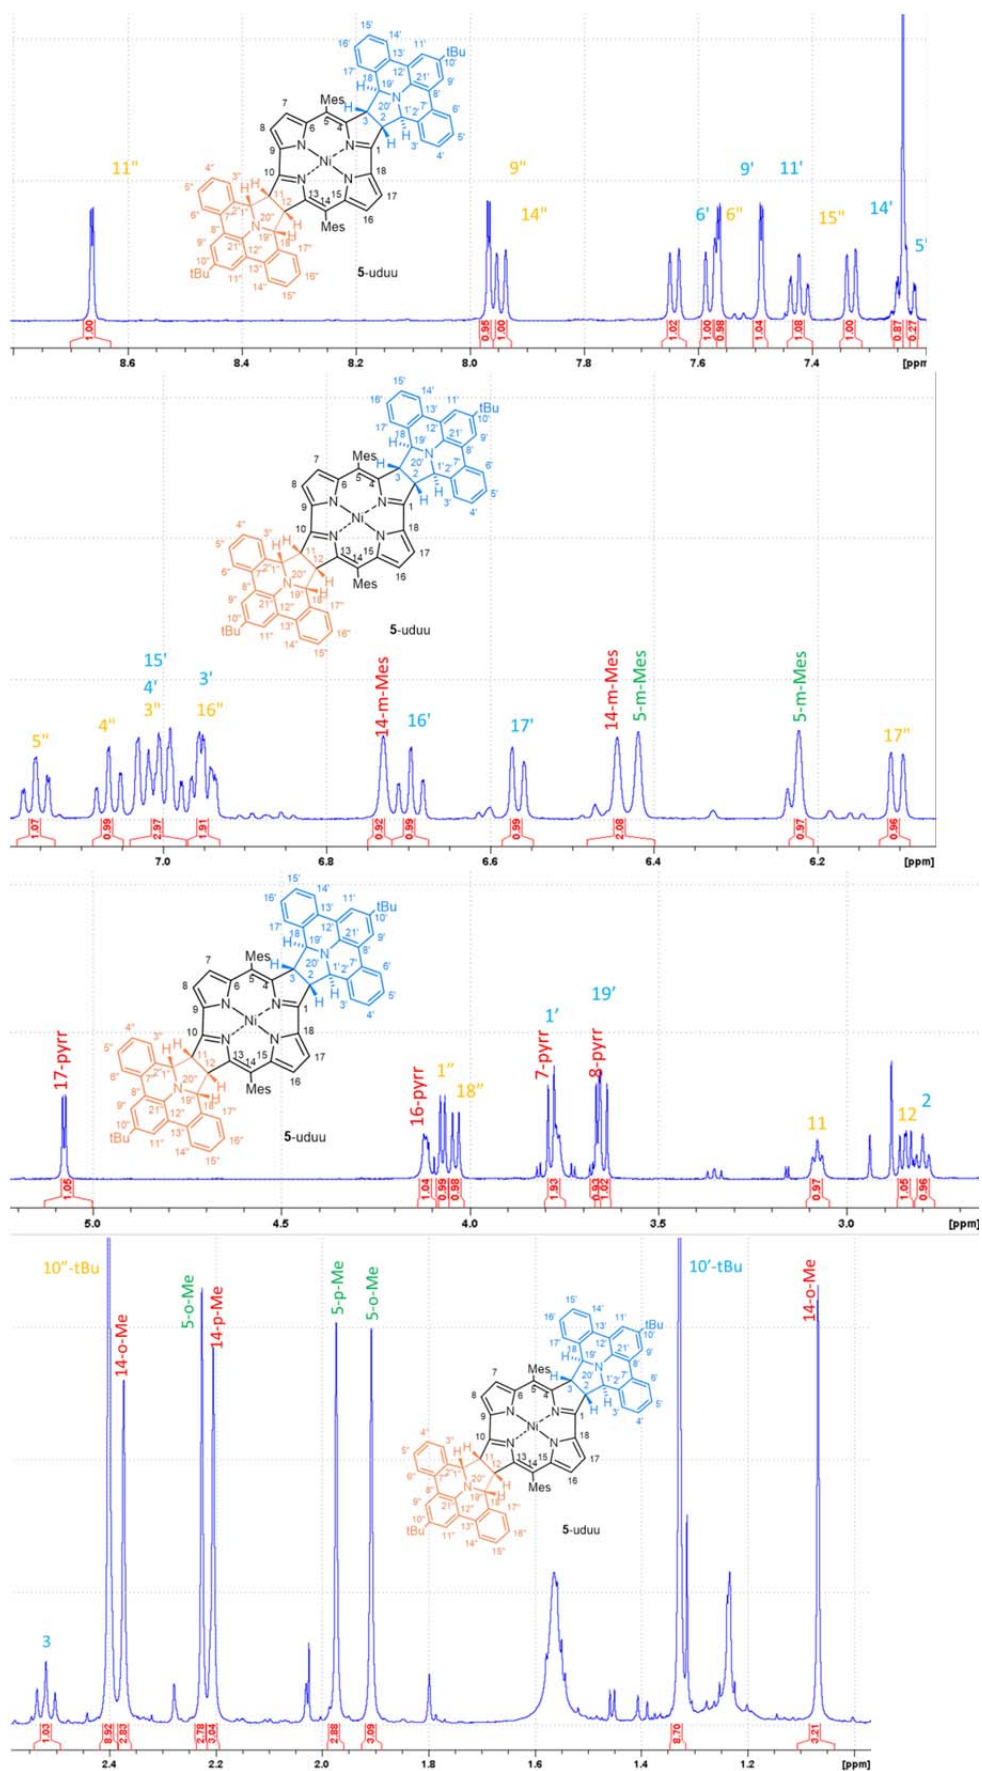

**Figure S49.** <sup>1</sup>H NMR signal assignments for 5-udu (500 MHz, 298 K, CDCl<sub>3</sub>).

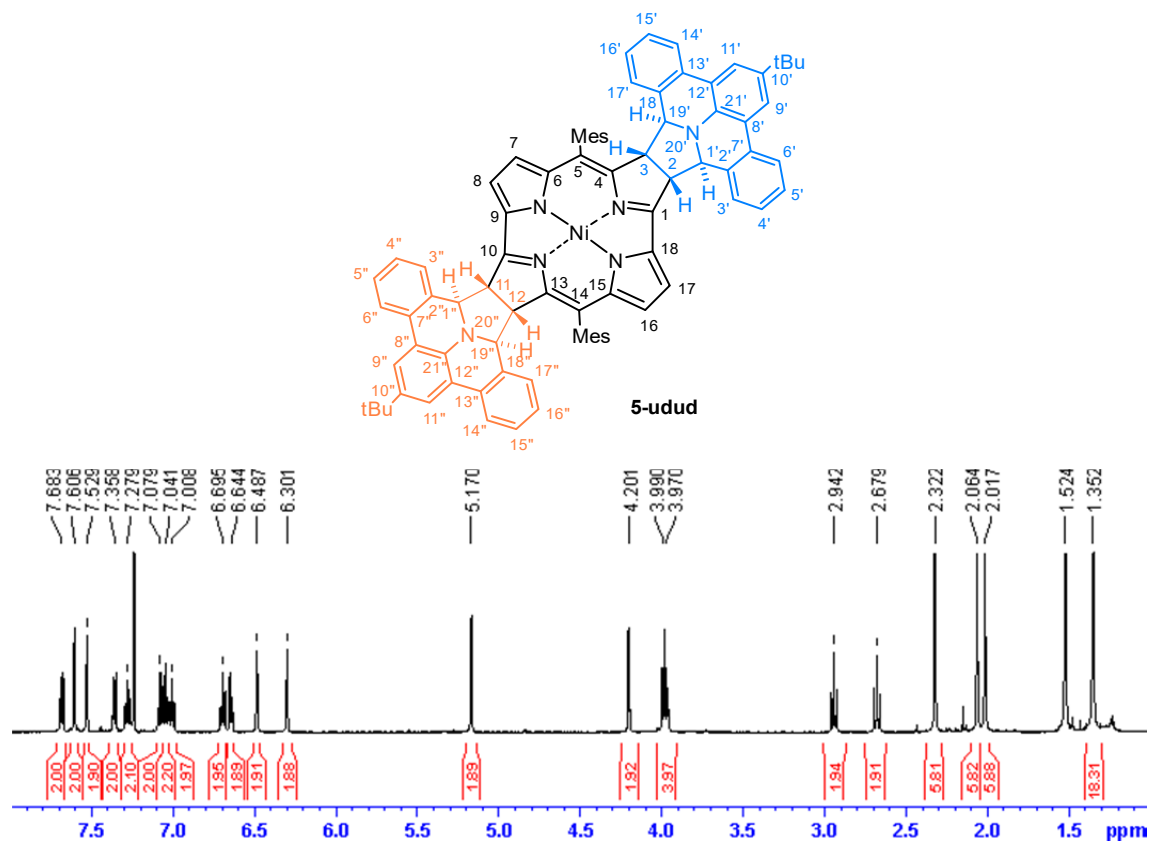

**Figure S50.**  $^1\text{H}$  NMR spectrum of **5-udud** (600 MHz, 298 K,  $\text{CDCl}_3$ ).

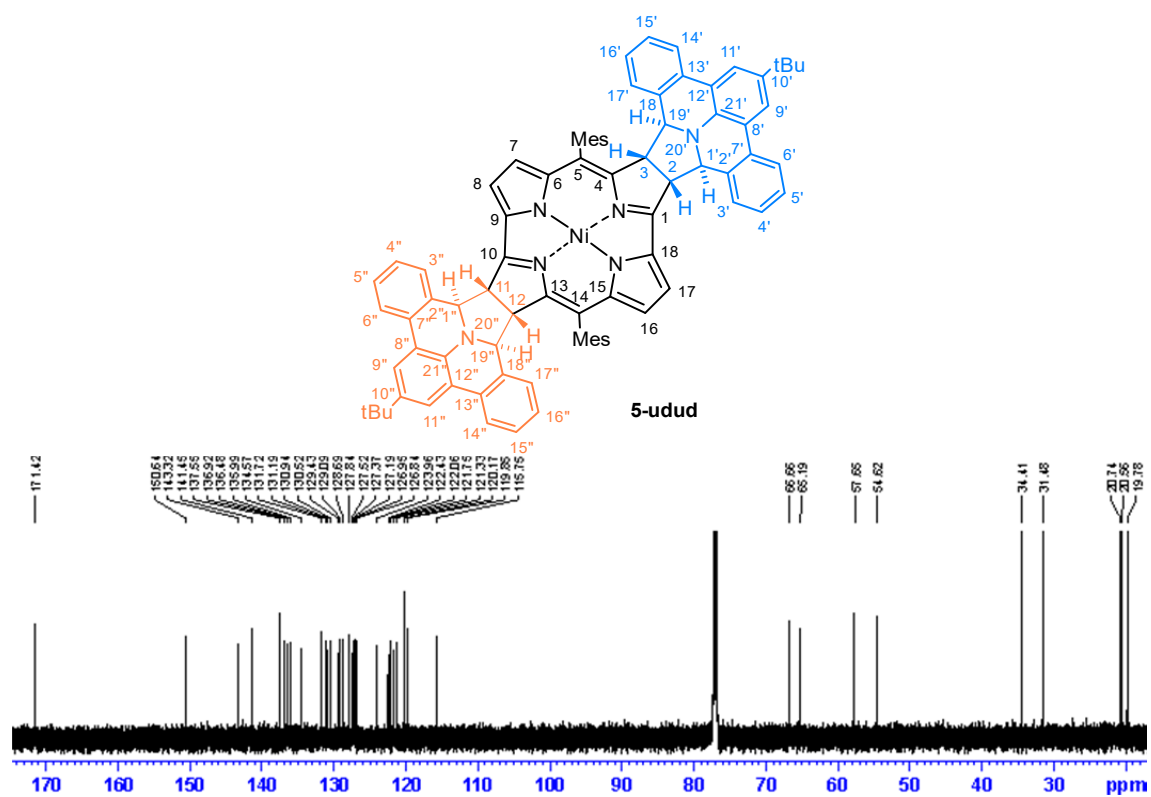

**Figure S51.**  $^{13}\text{C}$  NMR spectrum of **5-udud** (150 MHz, 298 K,  $\text{CDCl}_3$ ).



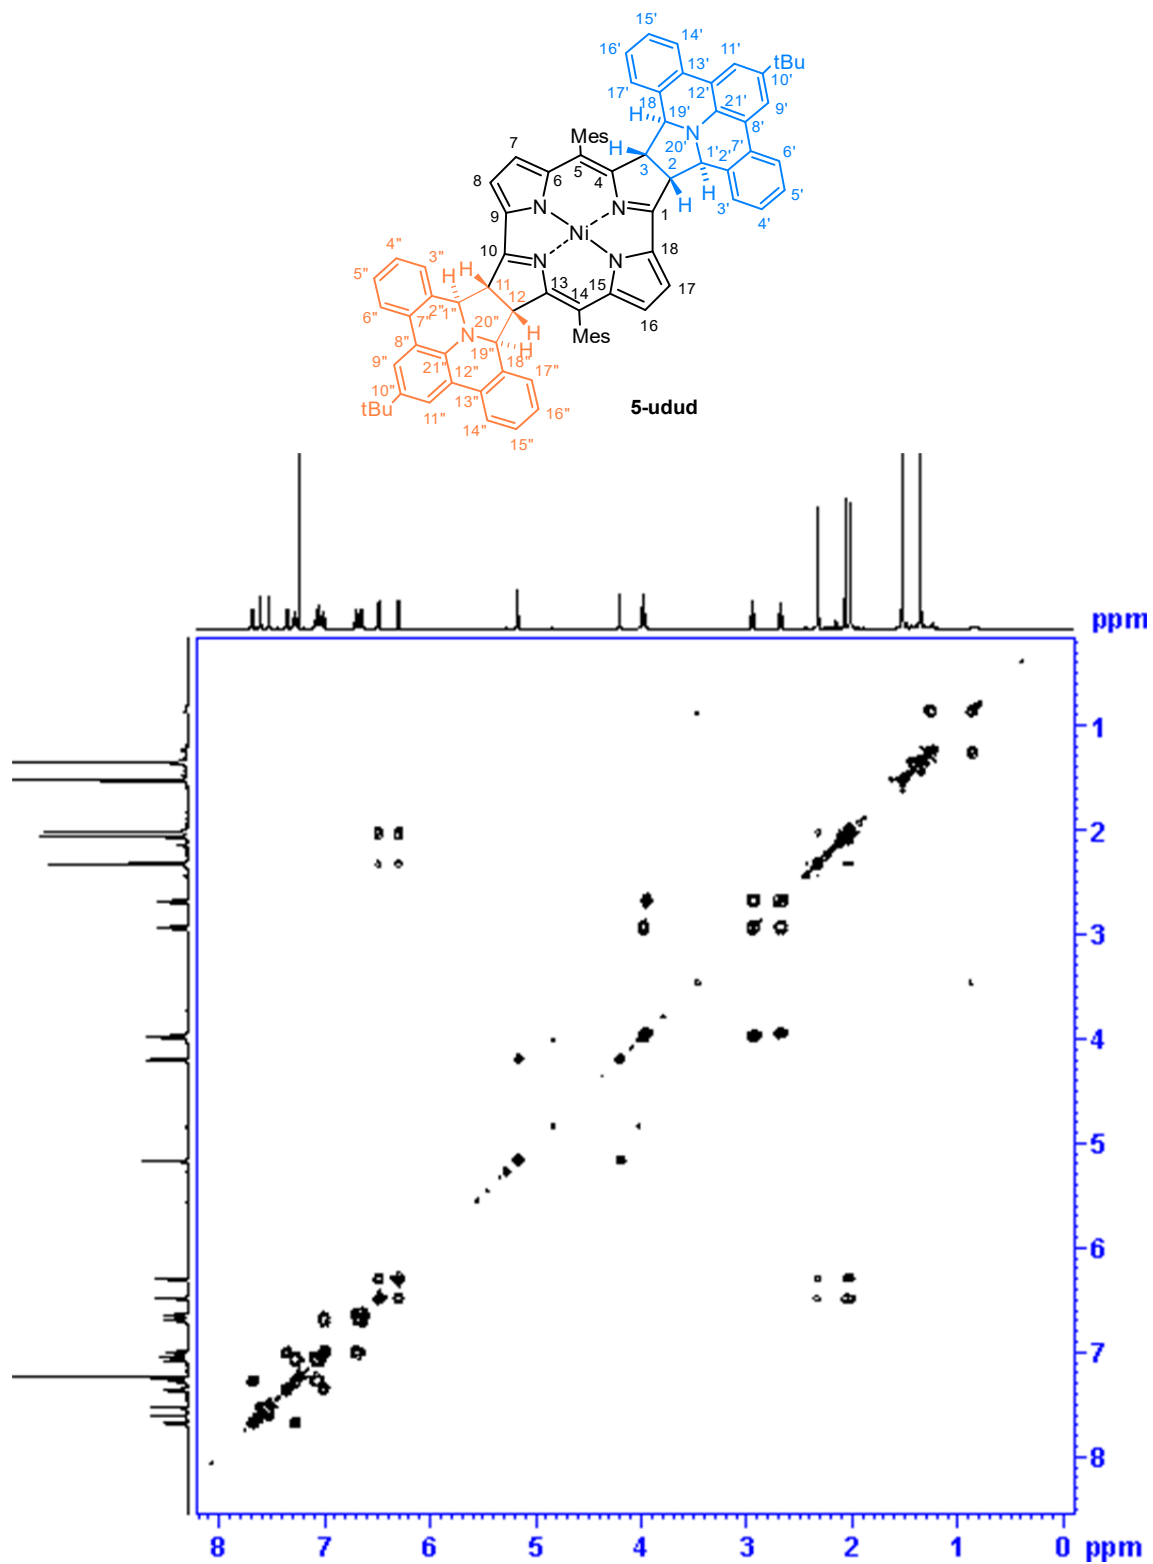

**Figure S52.**  $^1\text{H}$ ,  $^1\text{H}$  COSY spectrum of **5-udud** (500 MHz, 298 K,  $\text{CDCl}_3$ ).

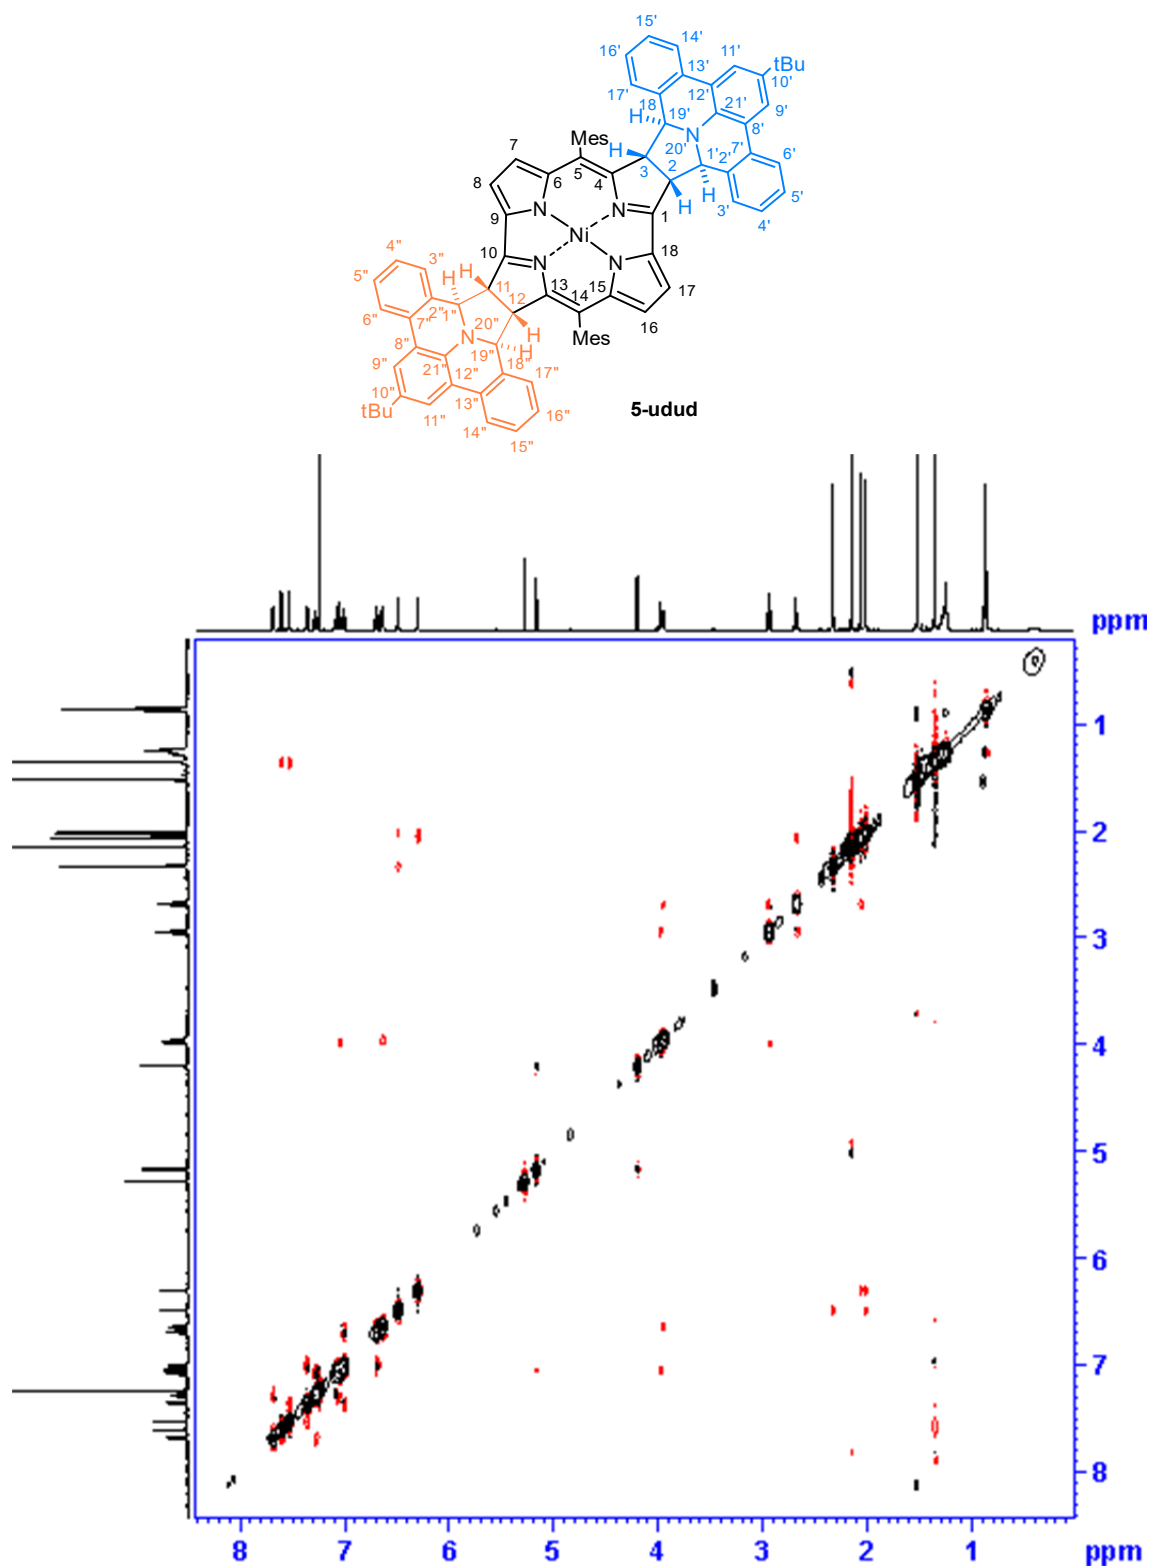

**Figure S53.**  $^1\text{H}$ ,  $^1\text{H}$  NOESY spectrum of **5-udud** (500 MHz, 298 K,  $\text{CDCl}_3$ ).

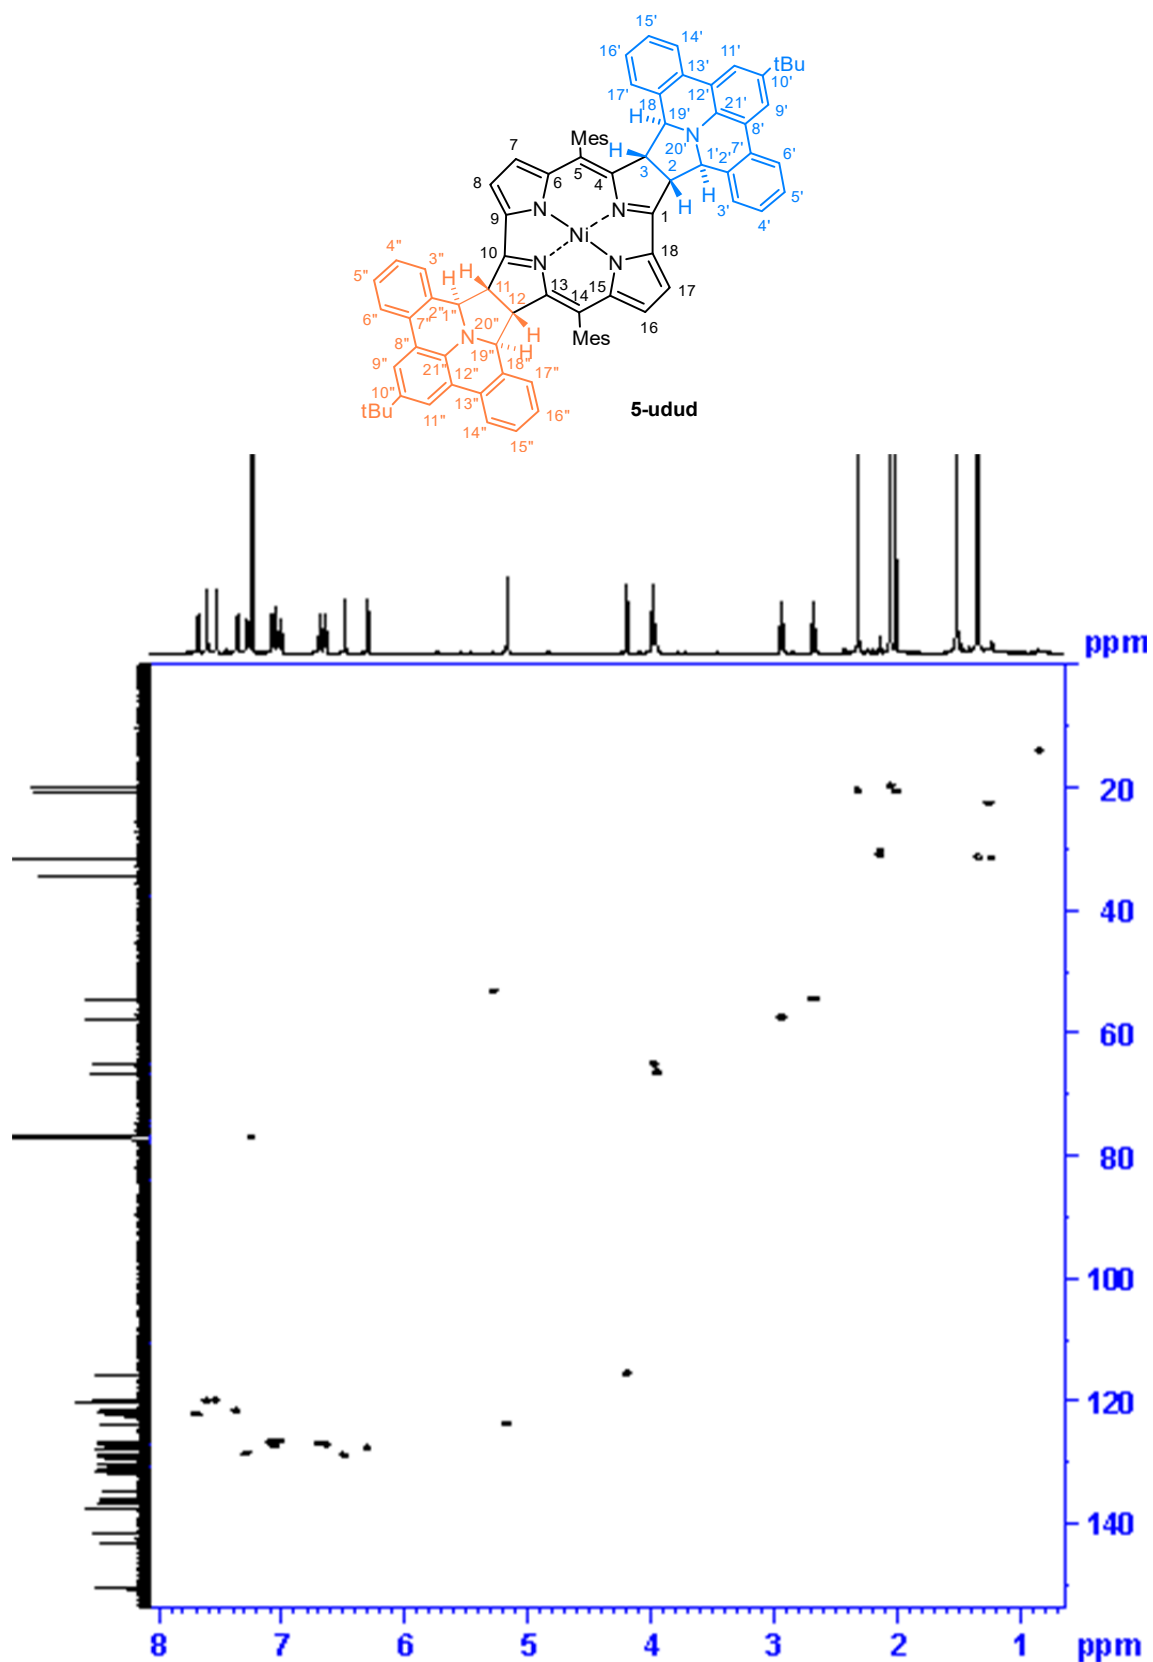

**Figure S54.**  $^1\text{H}$ ,  $^{13}\text{C}$  HSQC spectrum of **5-udud** (500/125 MHz, 298 K,  $\text{CDCl}_3$ ).

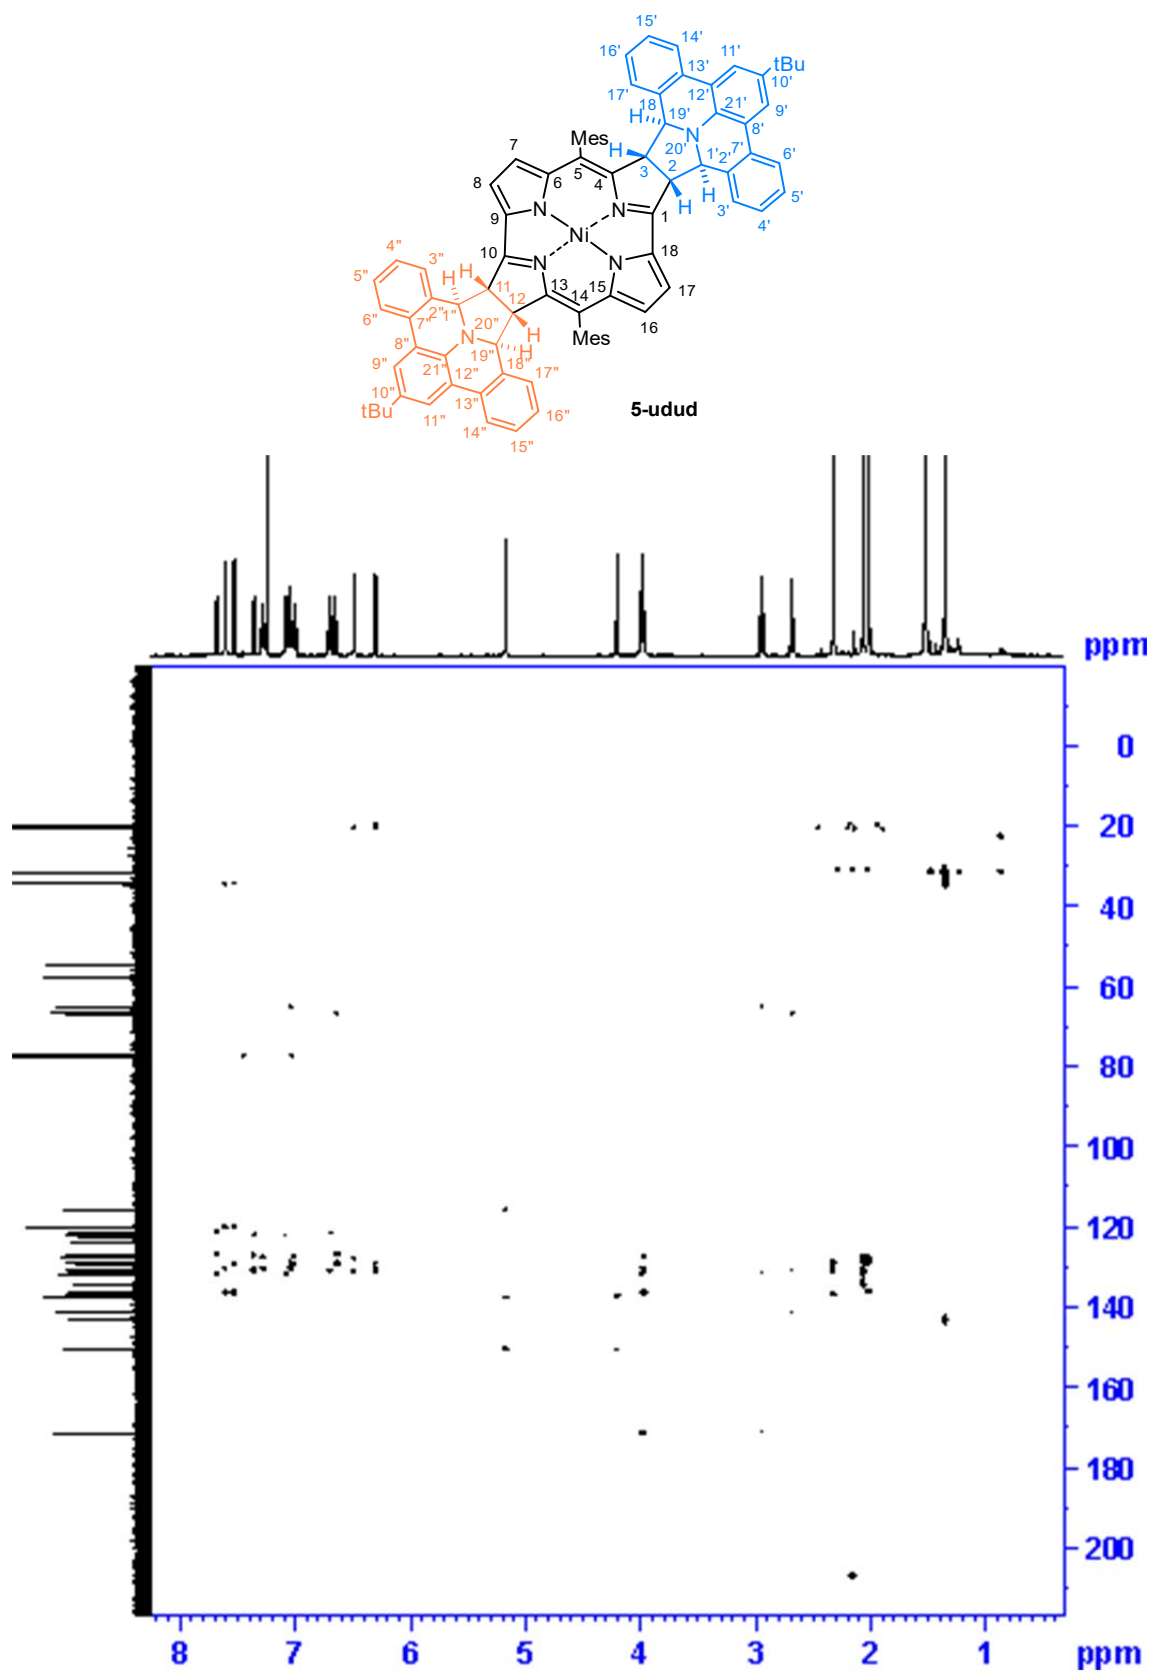

Figure S55.  $^1\text{H}$ ,  $^{13}\text{C}$  HMBC spectrum of 5-udud (500/125 MHz, 298 K,  $\text{CDCl}_3$ ).

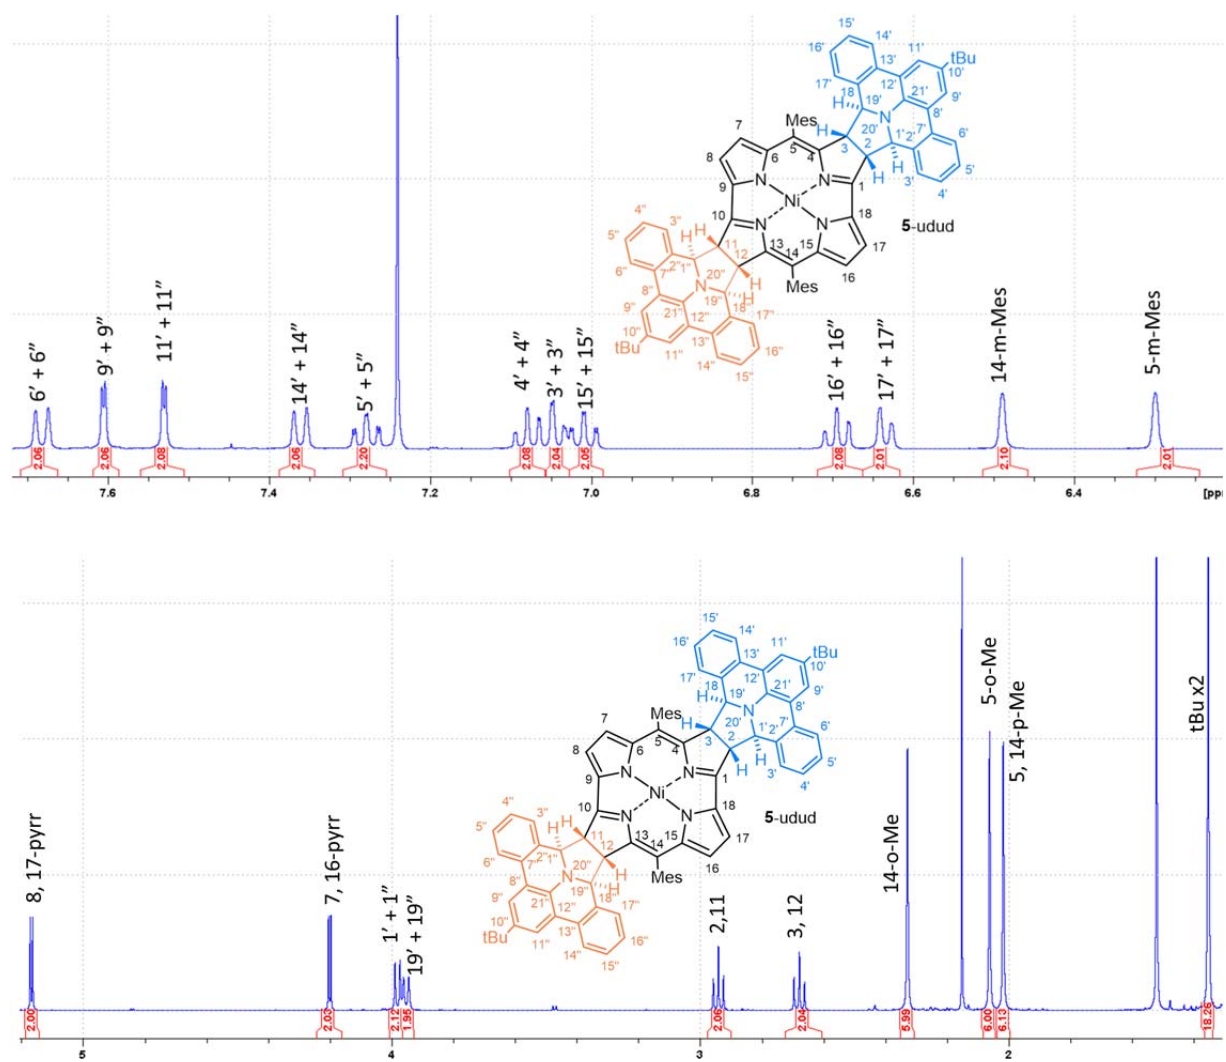

**Figure S56.**  $^1\text{H}$  NMR signal assignments for **5-udud** (500 MHz, 298 K,  $\text{CDCl}_3$ ).

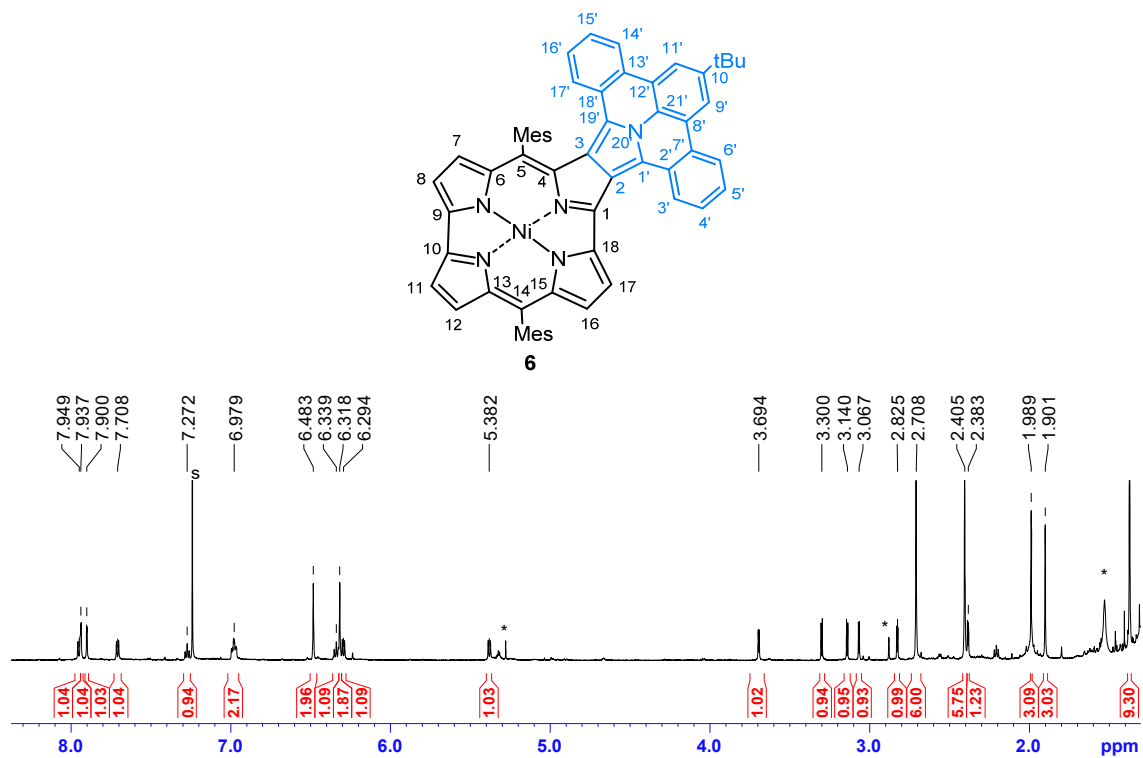

Figure S57.  $^1\text{H}$  NMR spectrum of **6** (600 MHz, 298 K,  $\text{CDCl}_3$ ).

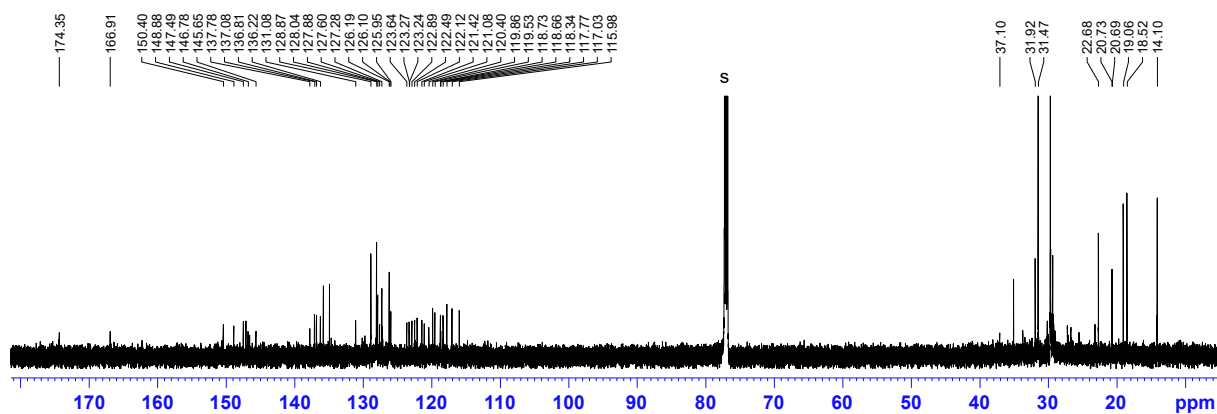

Figure S58.  $^{13}\text{C}$  NMR spectrum of **6** (150 MHz, 298 K,  $\text{CDCl}_3$ ).

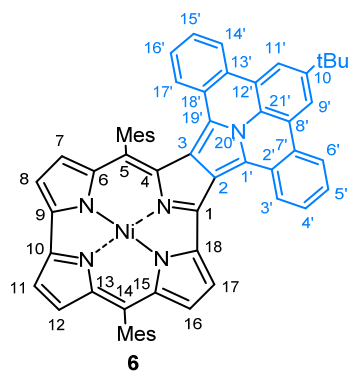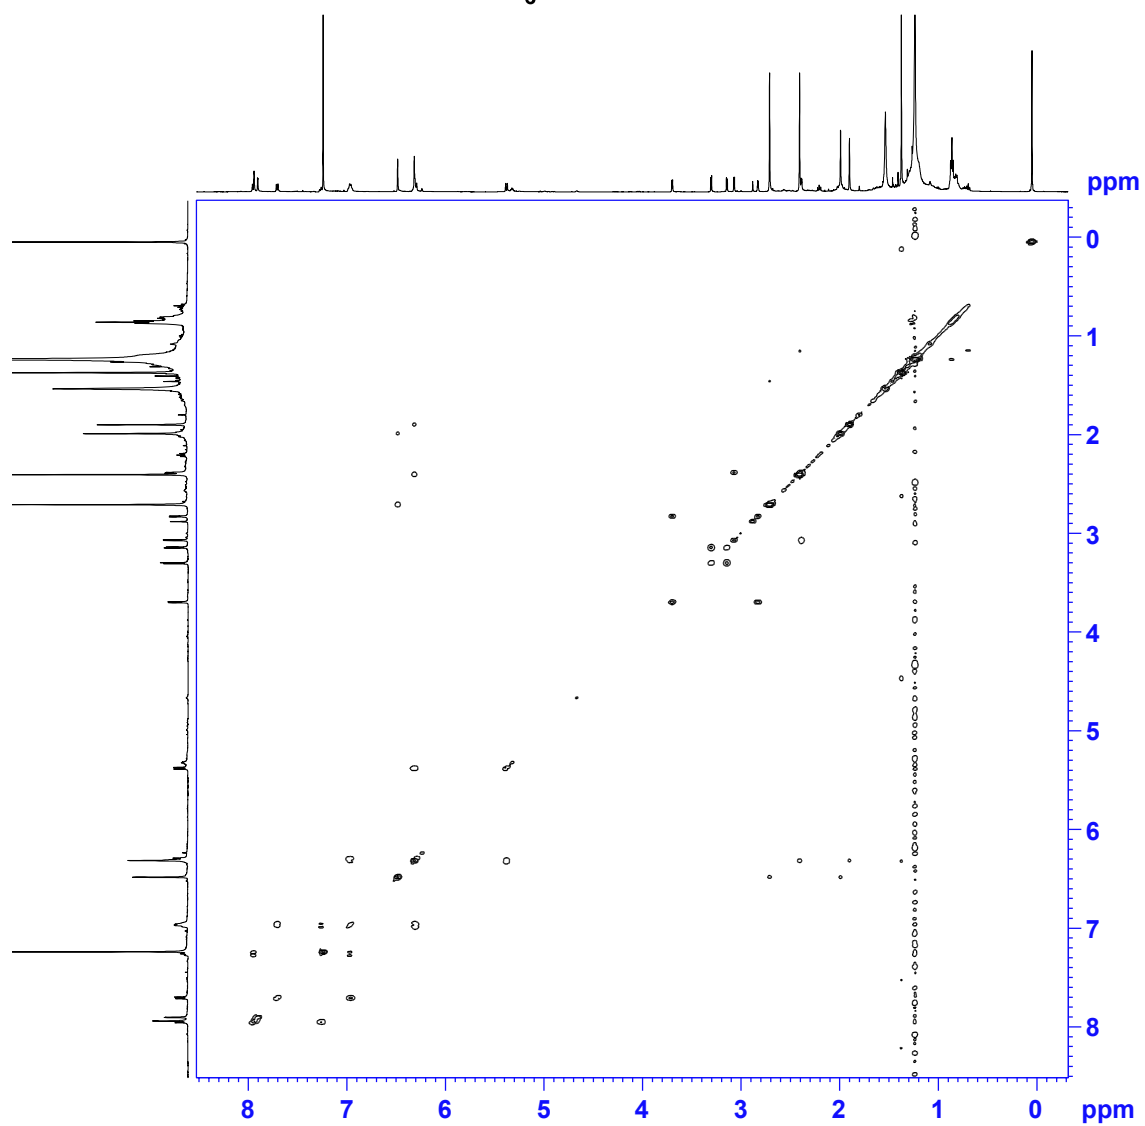

Figure S59.  $^1\text{H}$ ,  $^1\text{H}$  COSY spectrum of **6** (500 MHz, 298 K,  $\text{CDCl}_3$ ).

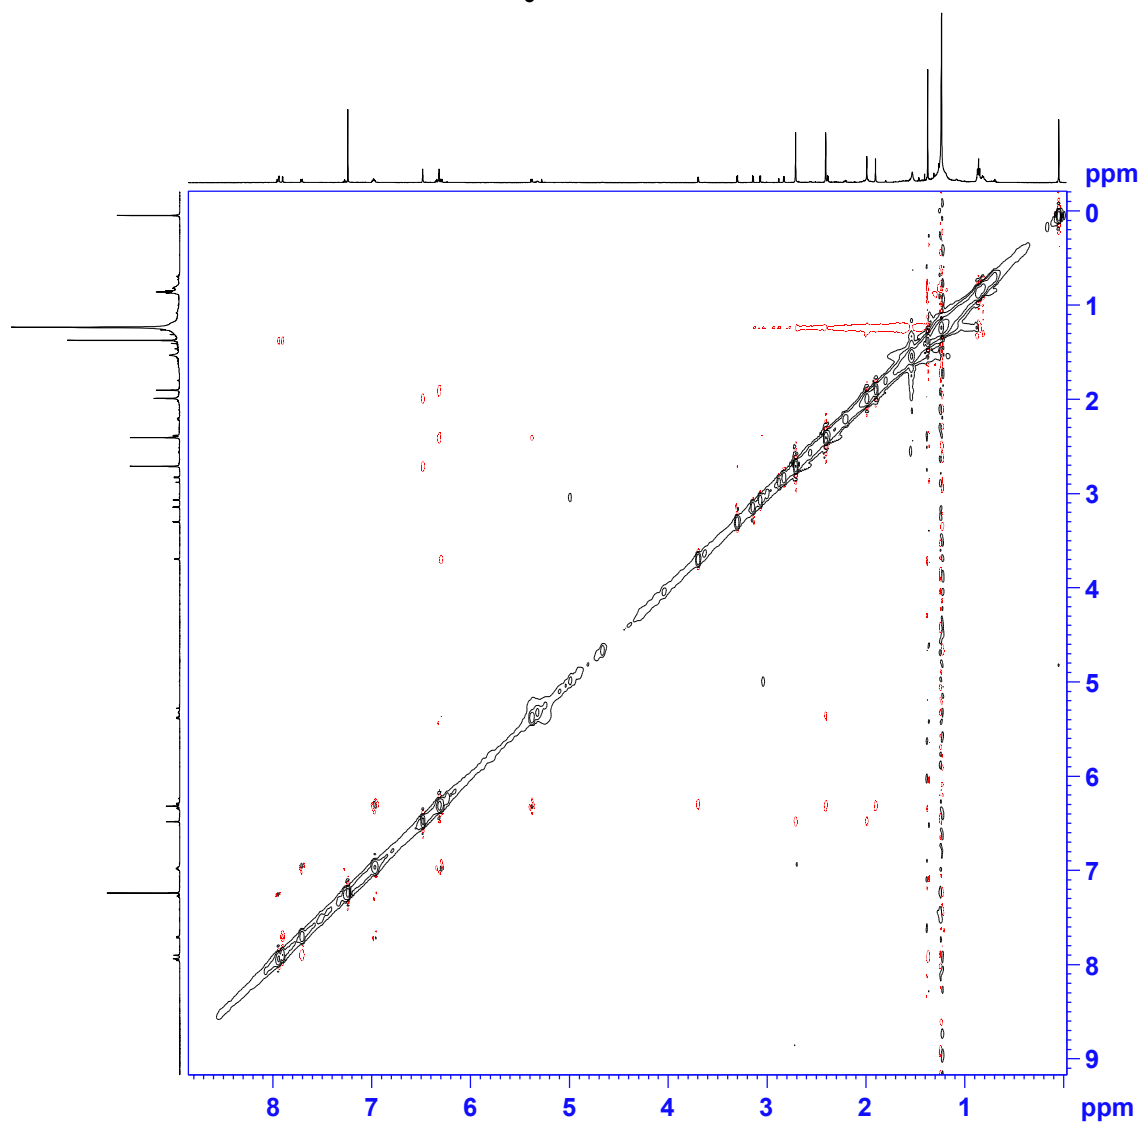

Figure S60.  $^1\text{H}$ ,  $^1\text{H}$  NOESY spectrum of **6** (500 MHz, 298 K,  $\text{CDCl}_3$ ).



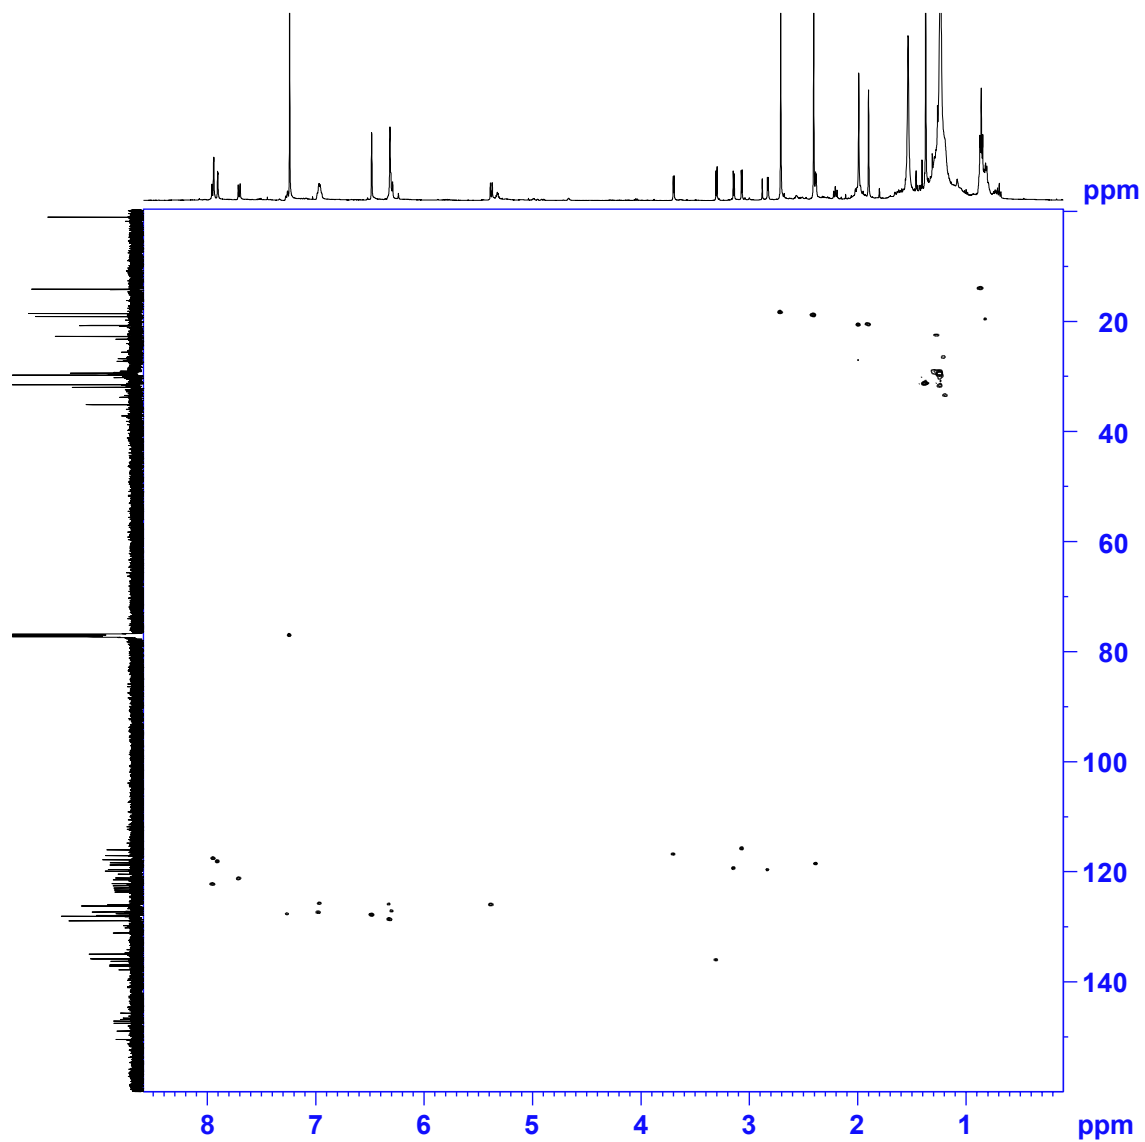

**Figure S61.**  $^1\text{H}$ ,  $^{13}\text{C}$  HSQC spectrum of **6** (500/125 MHz, 298 K,  $\text{CDCl}_3$ ).

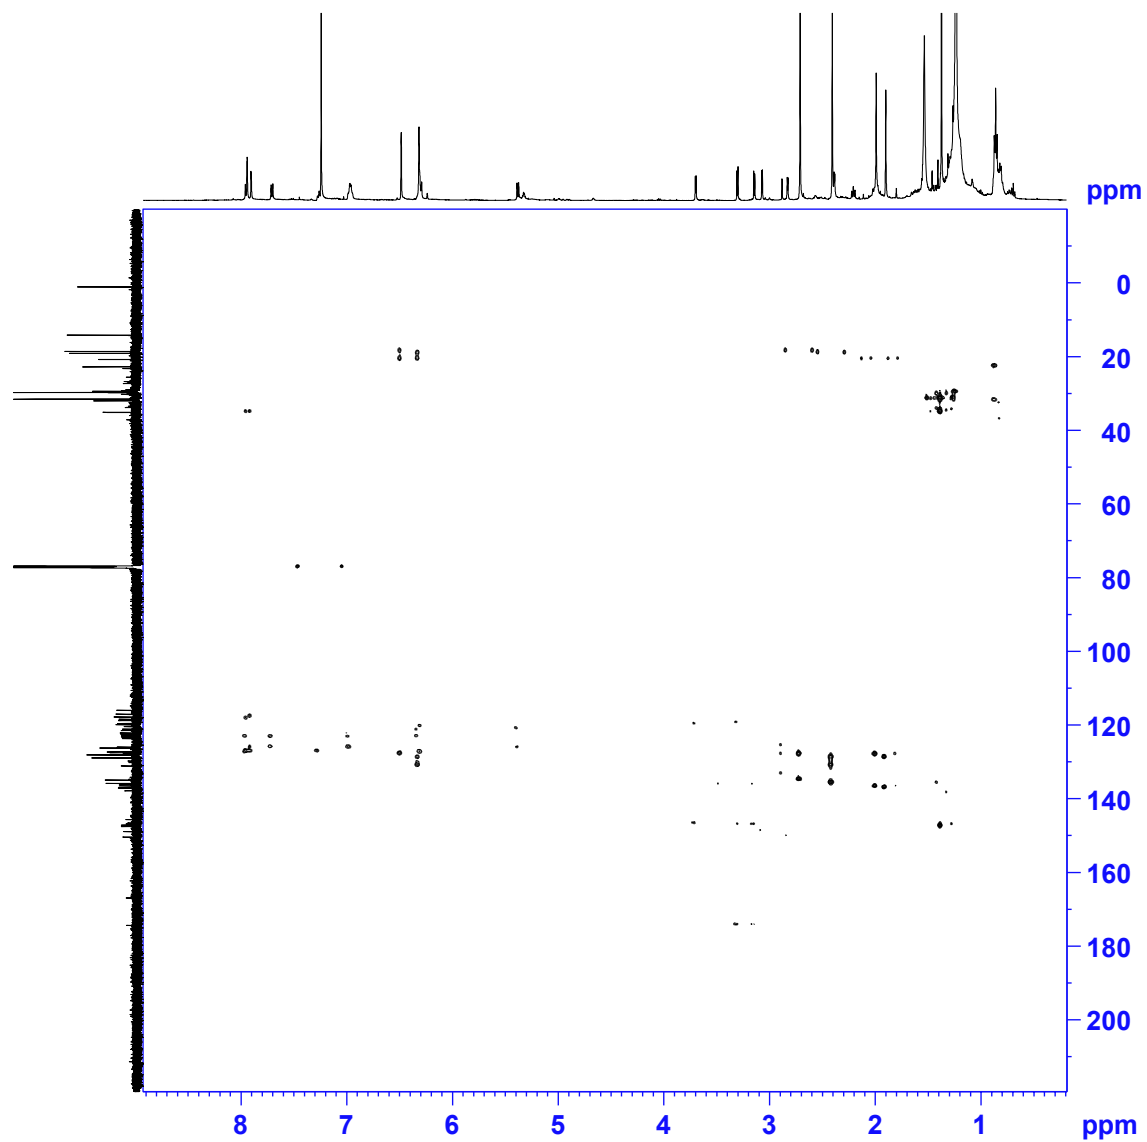

**Figure S62.**  $^1\text{H}$ ,  $^{13}\text{C}$  HMBC spectrum of **6** (500/125 MHz, 298 K,  $\text{CDCl}_3$ ).

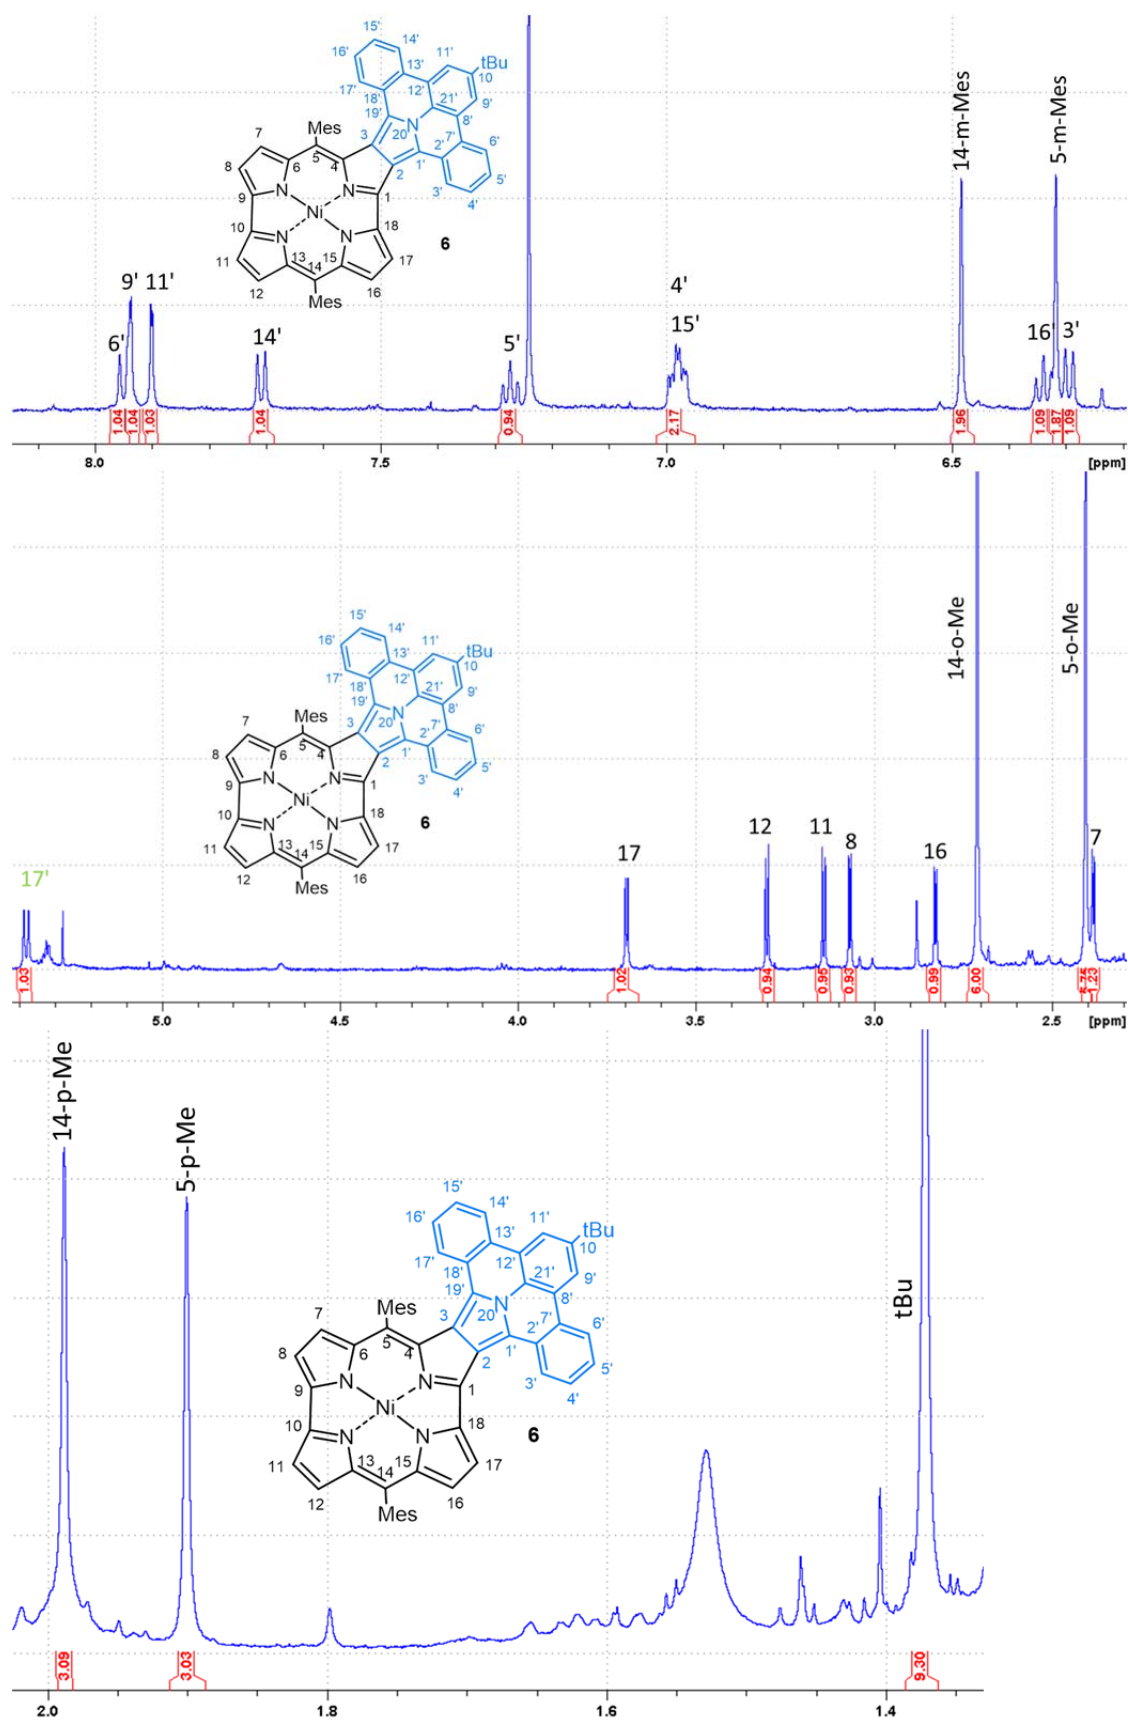

Figure S63. <sup>1</sup>H NMR signal assignments for **6** (500 MHz, 298 K, CDCl<sub>3</sub>).

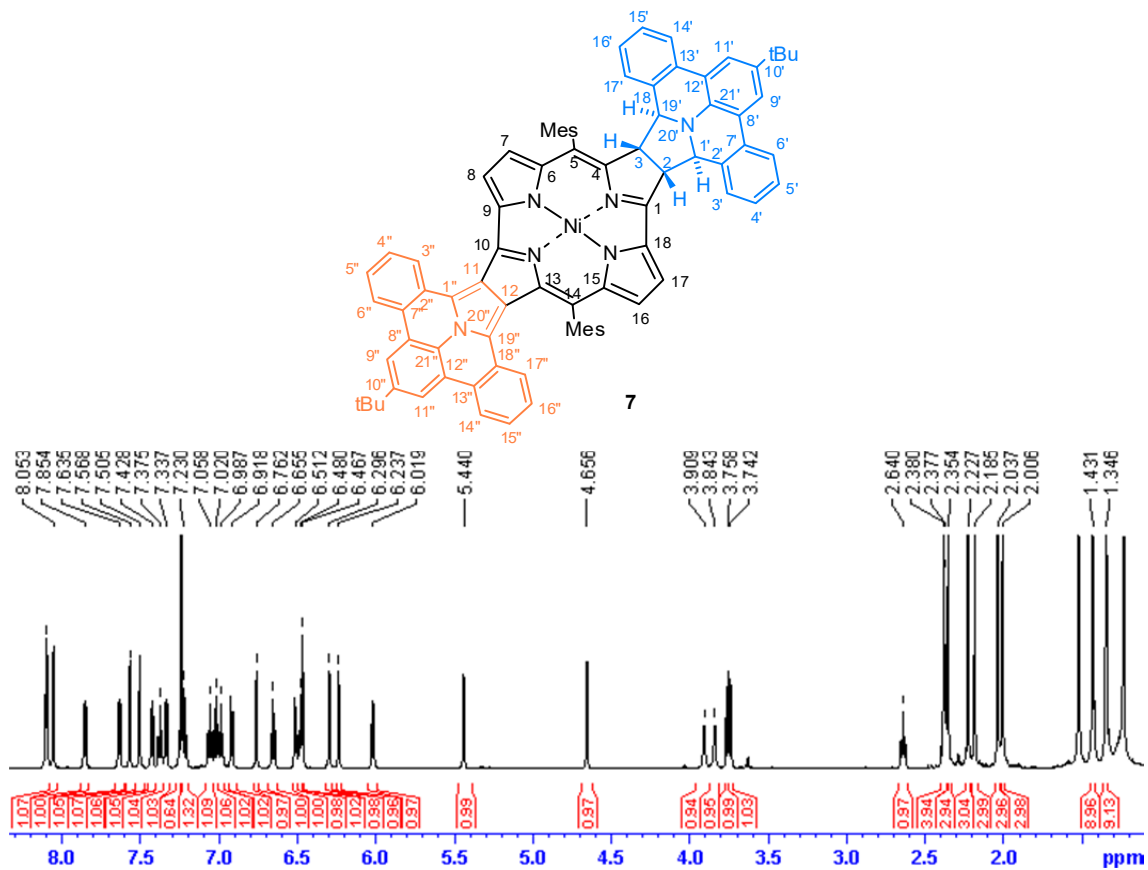

Figure S64. <sup>1</sup>H NMR spectrum of **7** (600 MHz, 298 K, CDCl<sub>3</sub>).

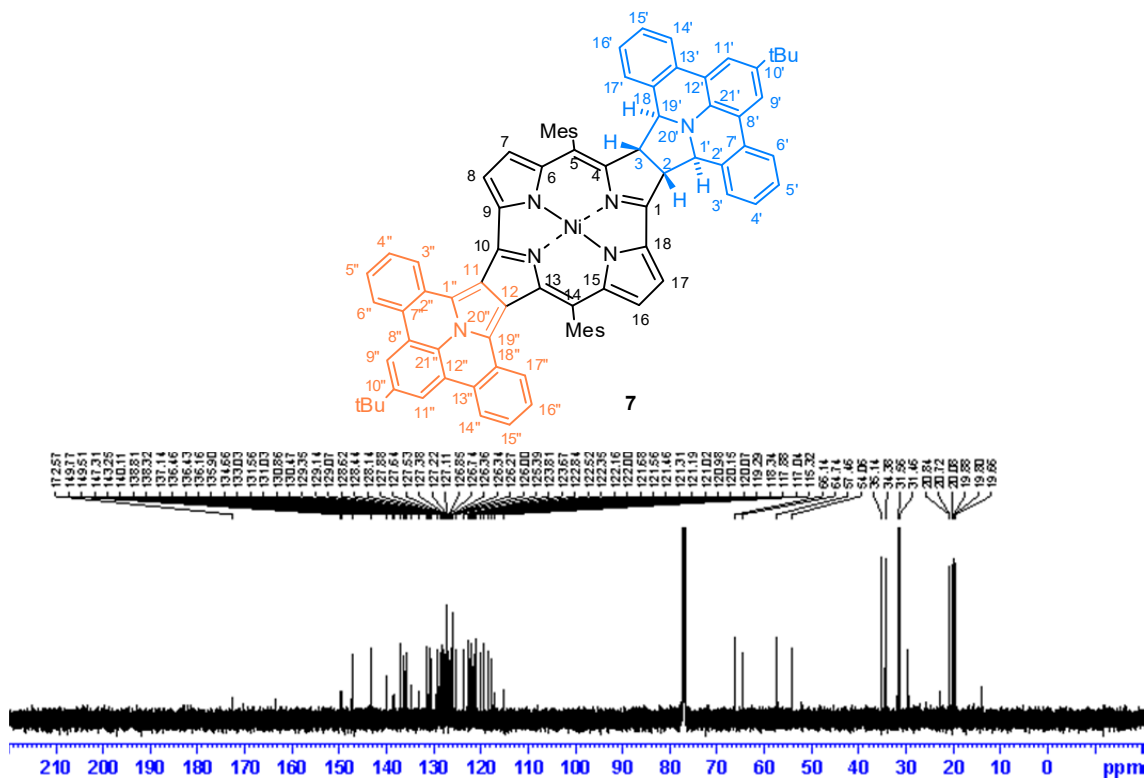

Figure S65. <sup>13</sup>C NMR spectrum of **7** (150 MHz, 298 K, CDCl<sub>3</sub>).

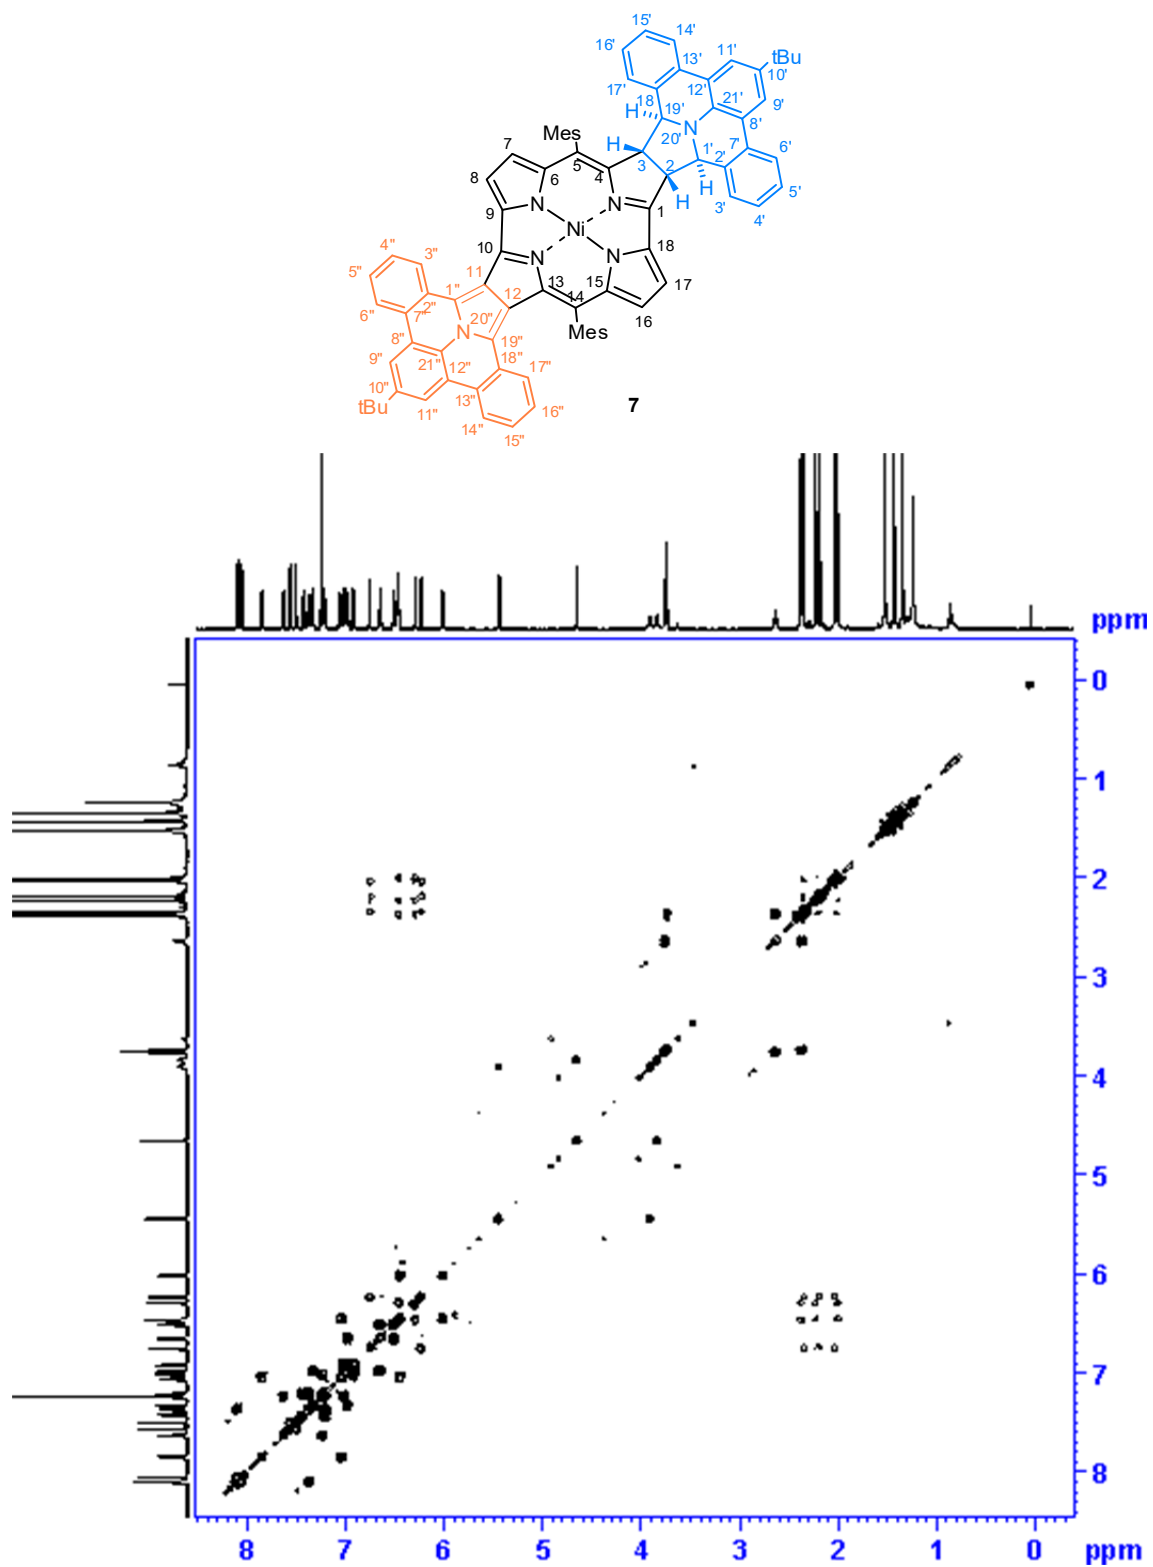

Figure S66.  $^1\text{H}$ ,  $^1\text{H}$  COSY spectrum of **7** (500 MHz, 298 K,  $\text{CDCl}_3$ ).

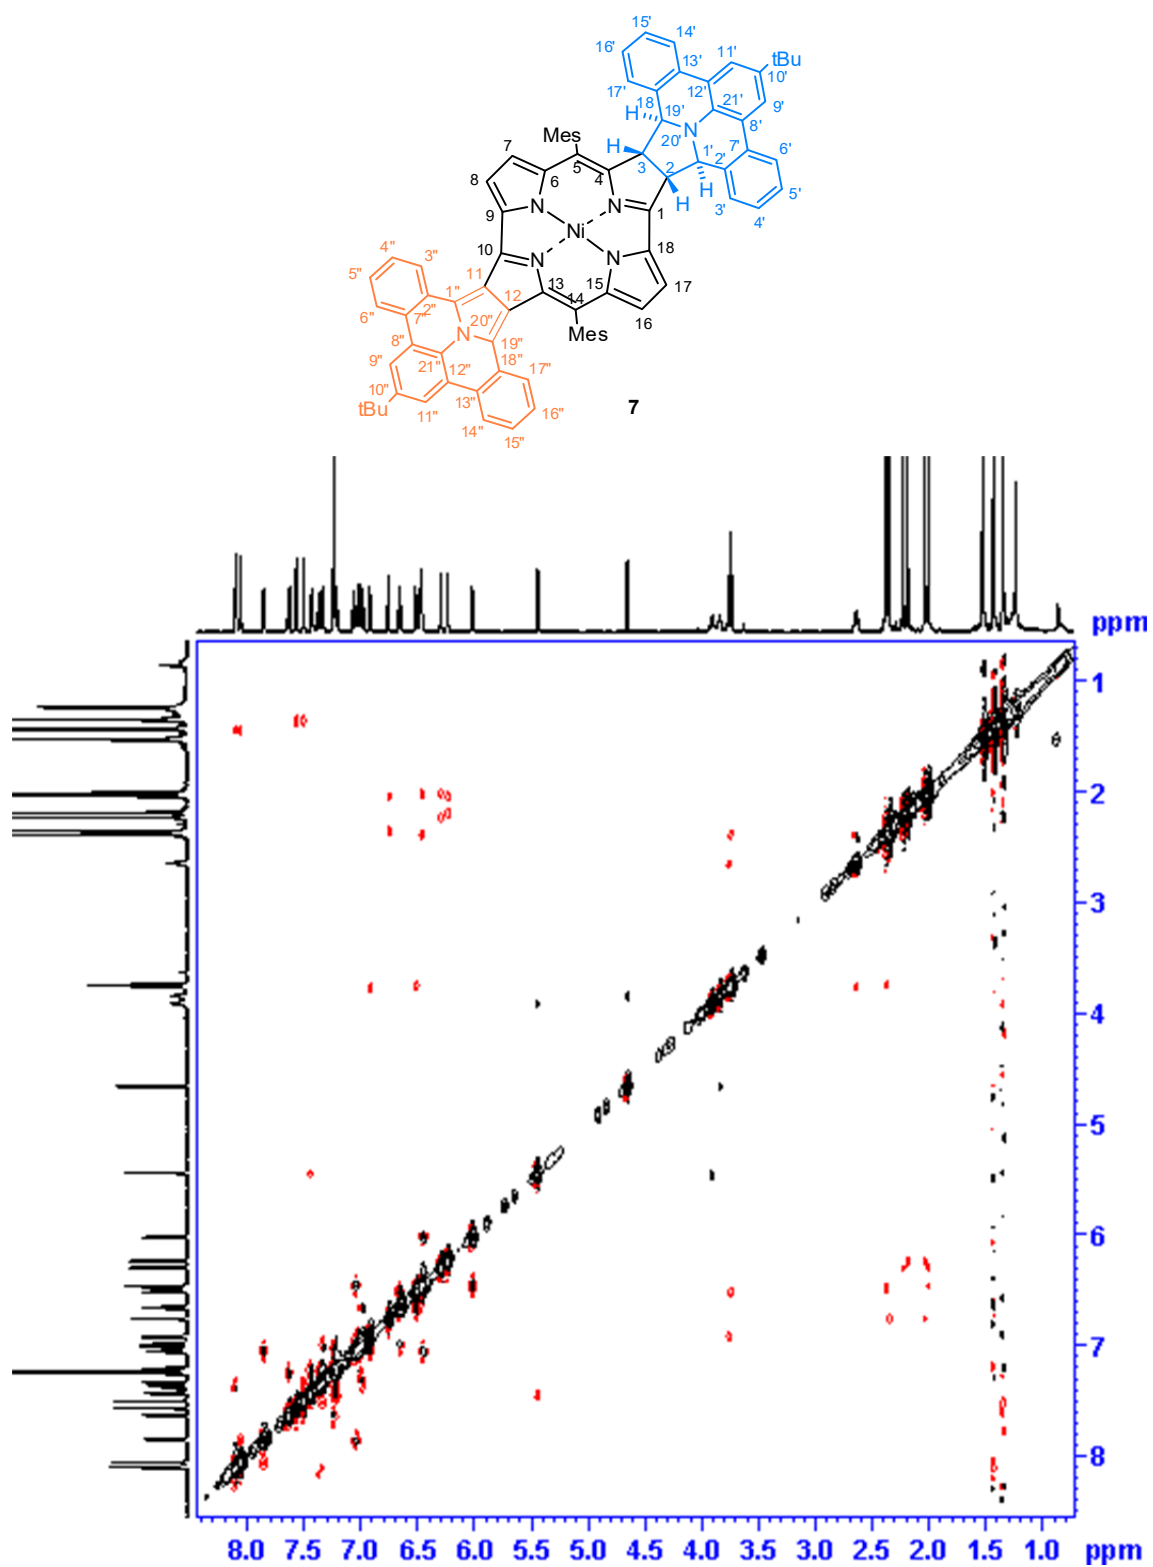

Figure S67.  $^1\text{H}$ ,  $^1\text{H}$  NOESY spectrum of **7** (500 MHz, 298 K,  $\text{CDCl}_3$ ).

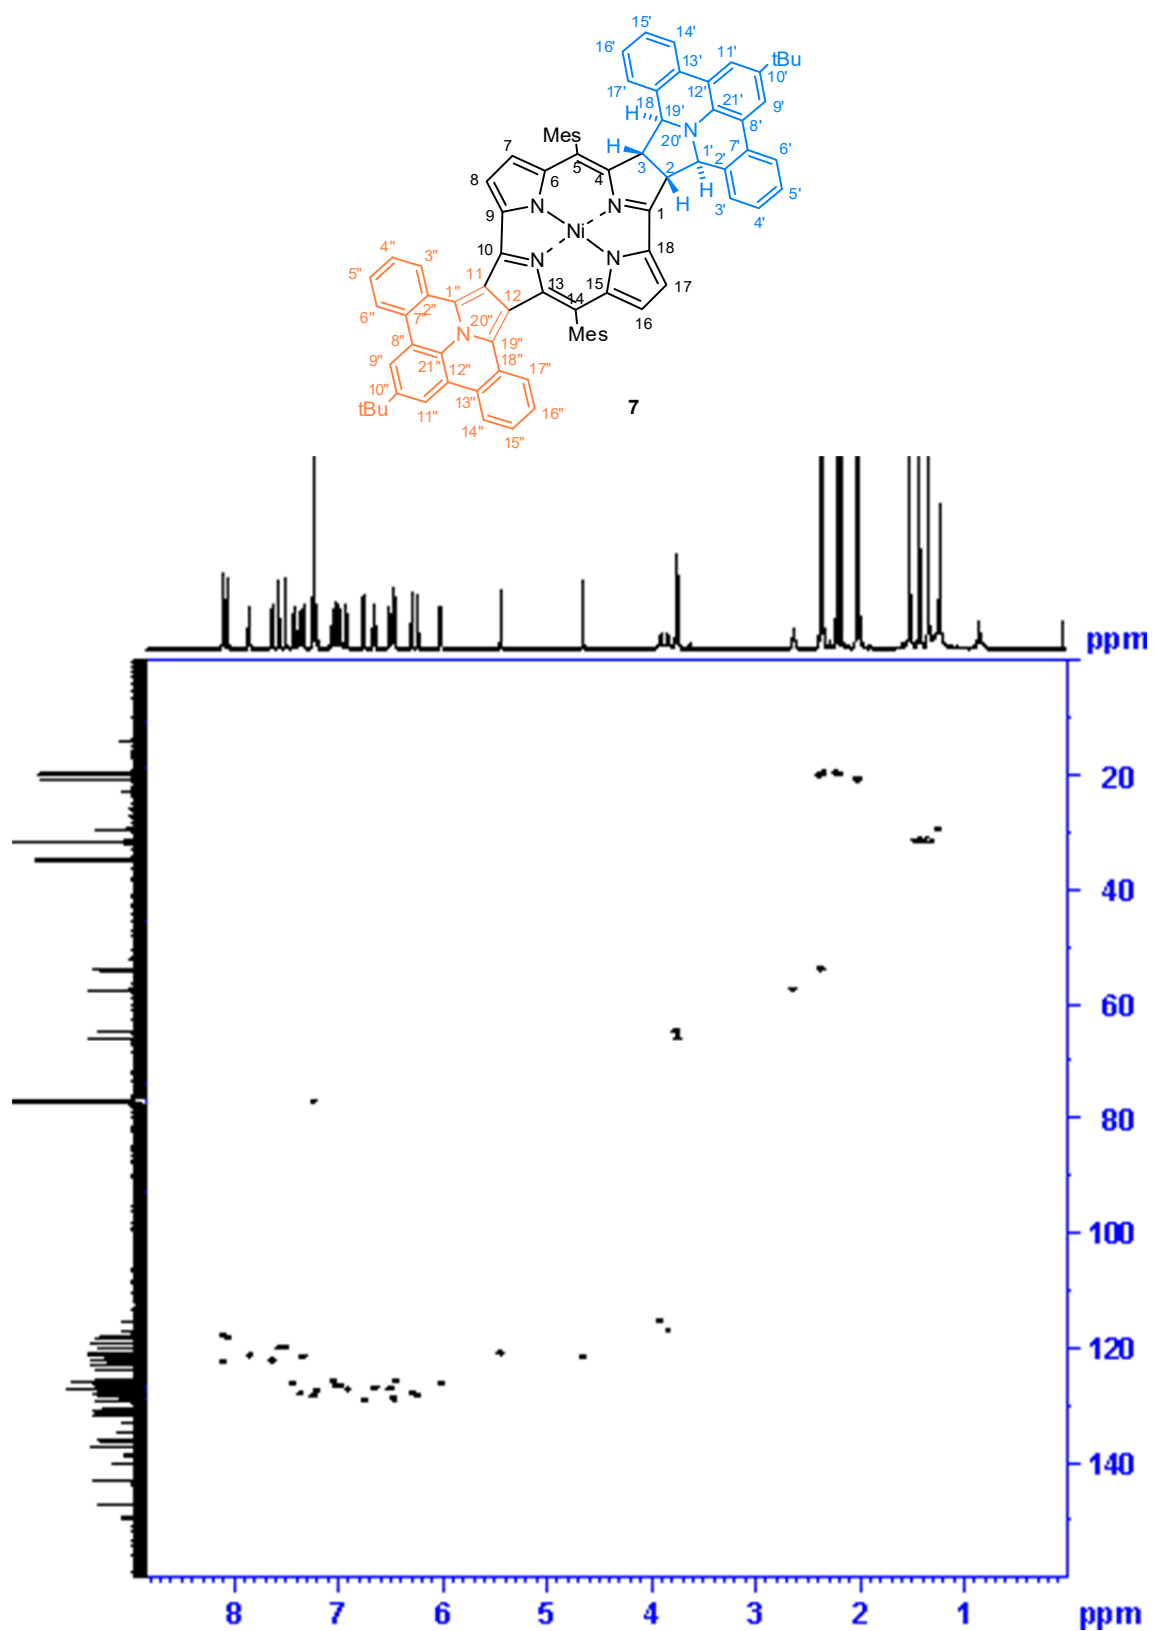

**Figure S68.**  $^1\text{H}$ ,  $^{13}\text{C}$  HSQC spectrum of **7** (500/125 MHz, 298 K,  $\text{CDCl}_3$ ).

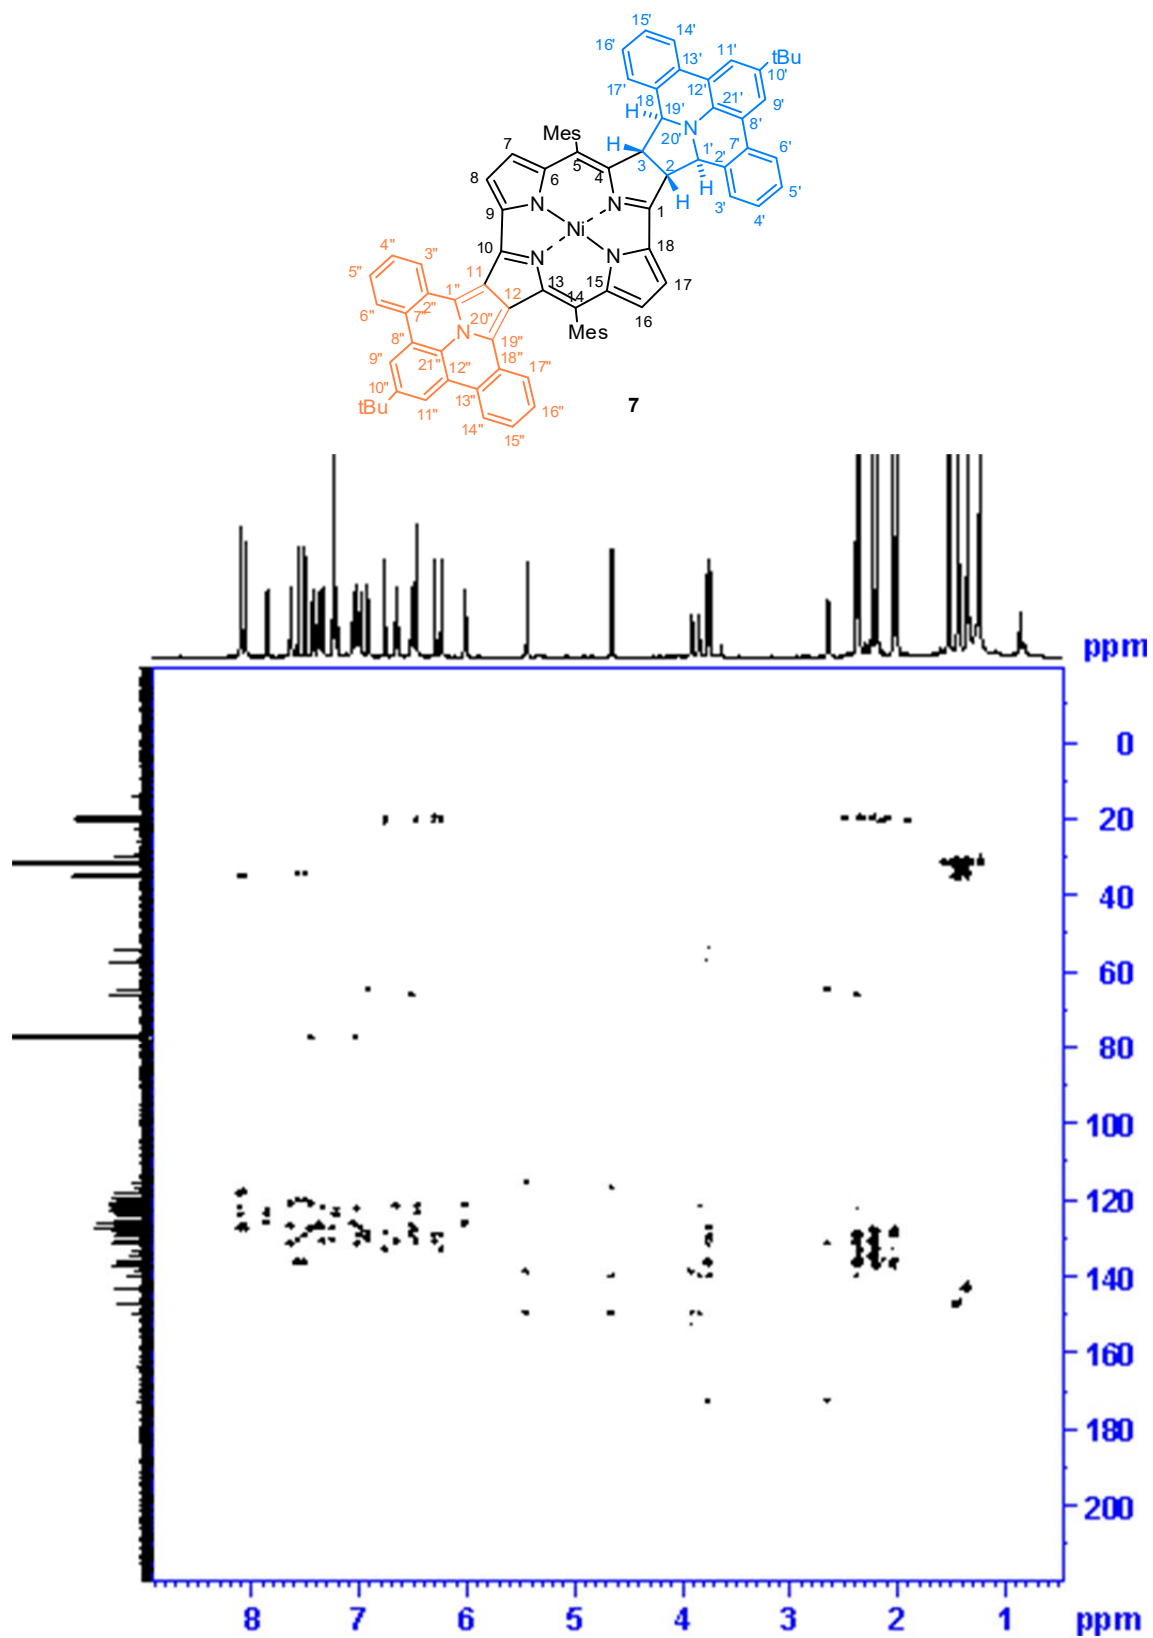

Figure S69.  $^1\text{H}$ ,  $^{13}\text{C}$  HMBC spectrum of **7** (500/125 MHz, 298 K,  $\text{CDCl}_3$ ).



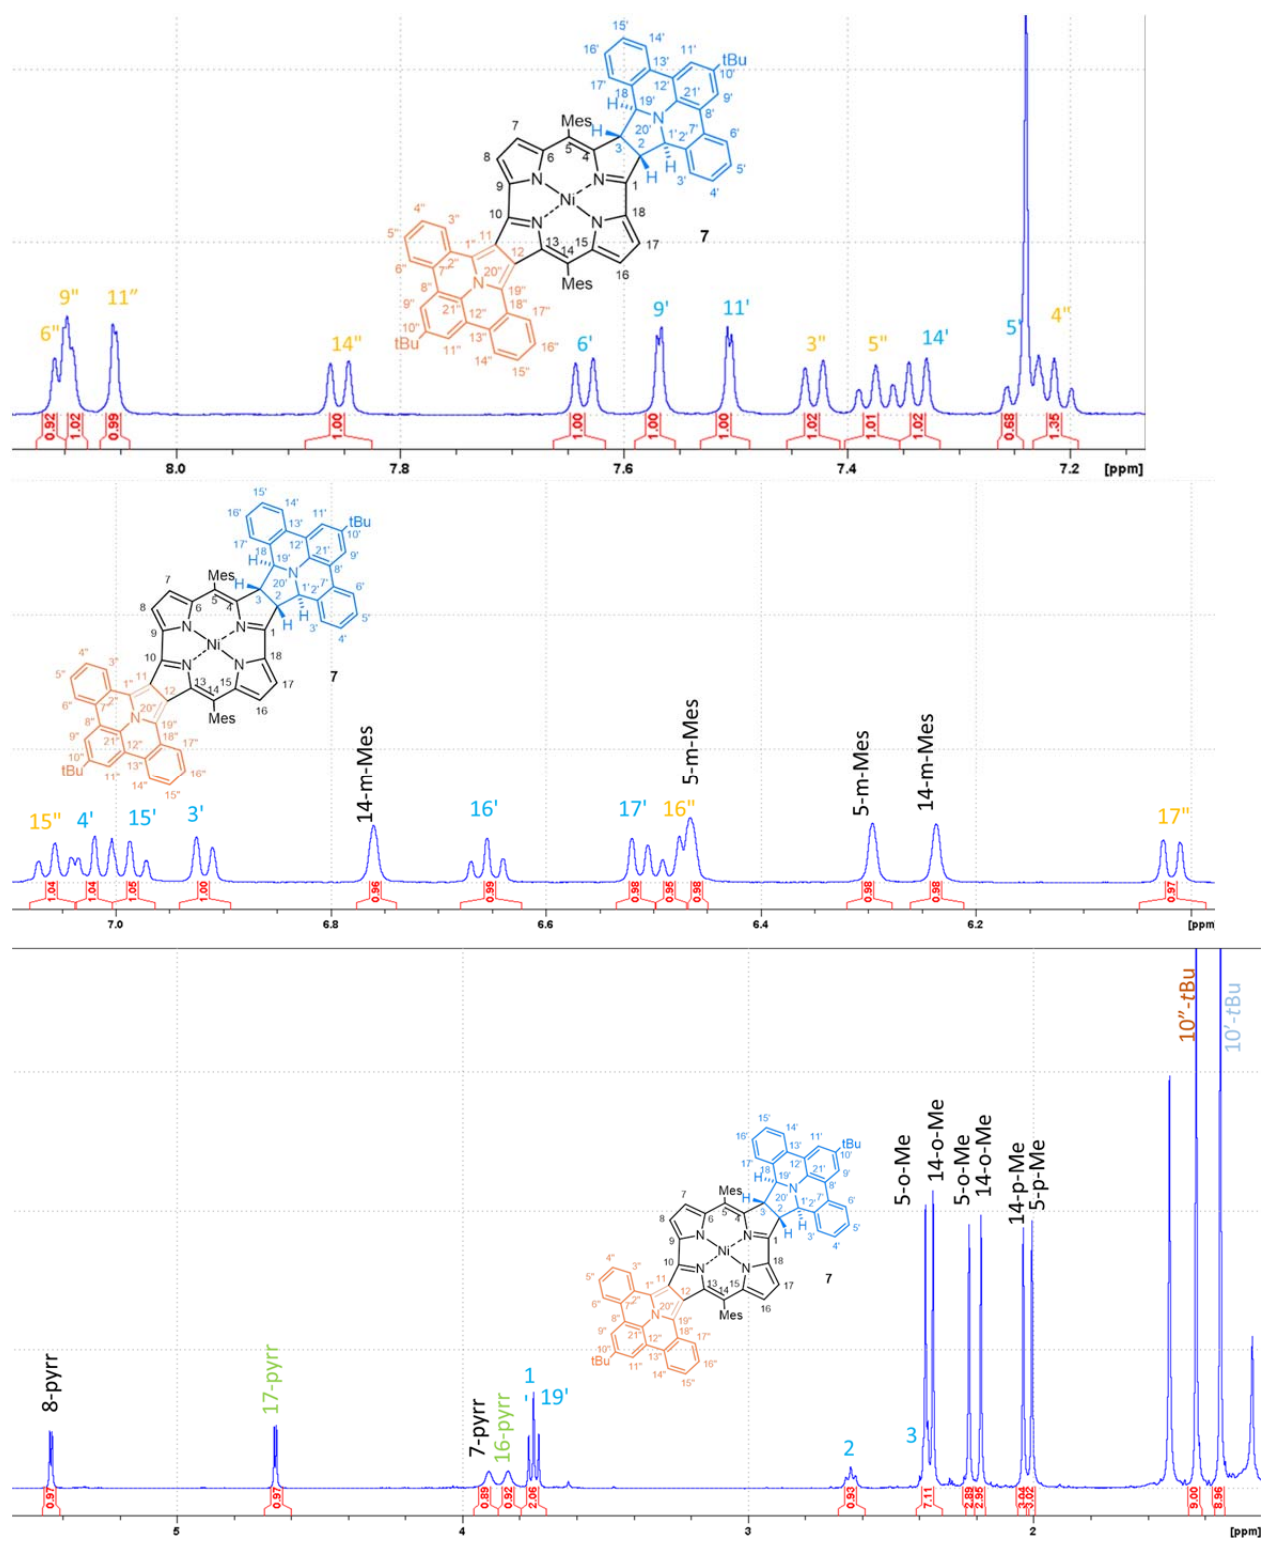

Figure S70. <sup>1</sup>H NMR signal assignments for **7** (500 MHz, 298 K, CDCl<sub>3</sub>).

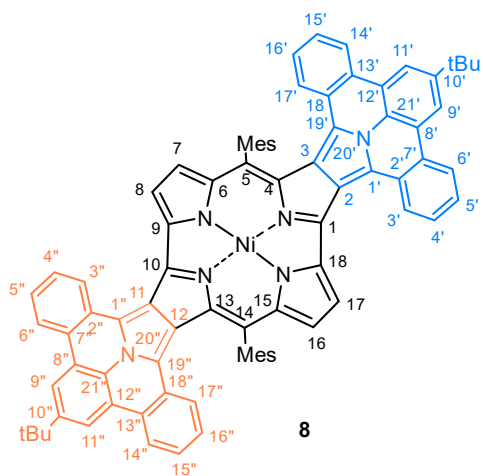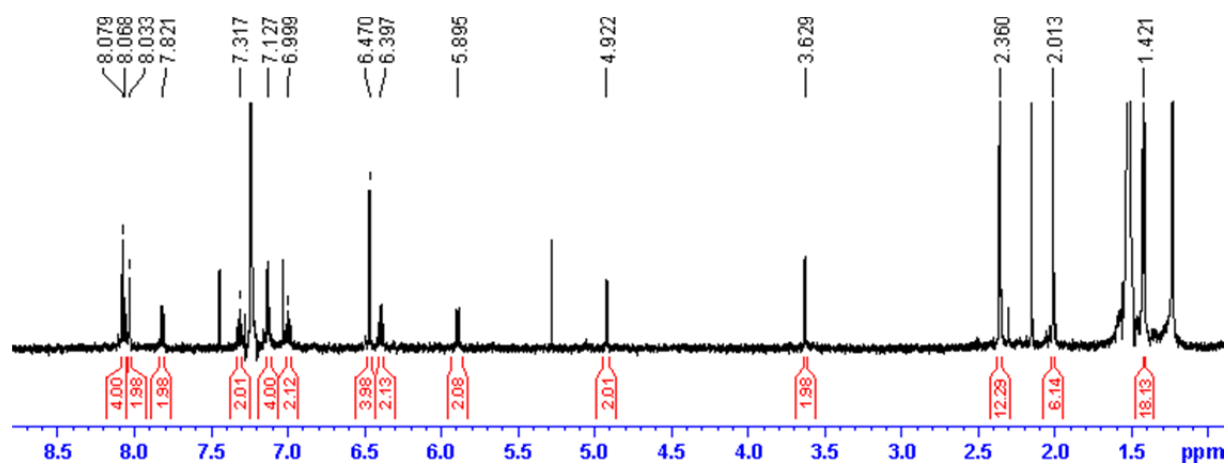

**Figure S71.**  $^1\text{H}$  NMR spectrum of **8** (500 MHz, 298 K,  $\text{CDCl}_3$ ).

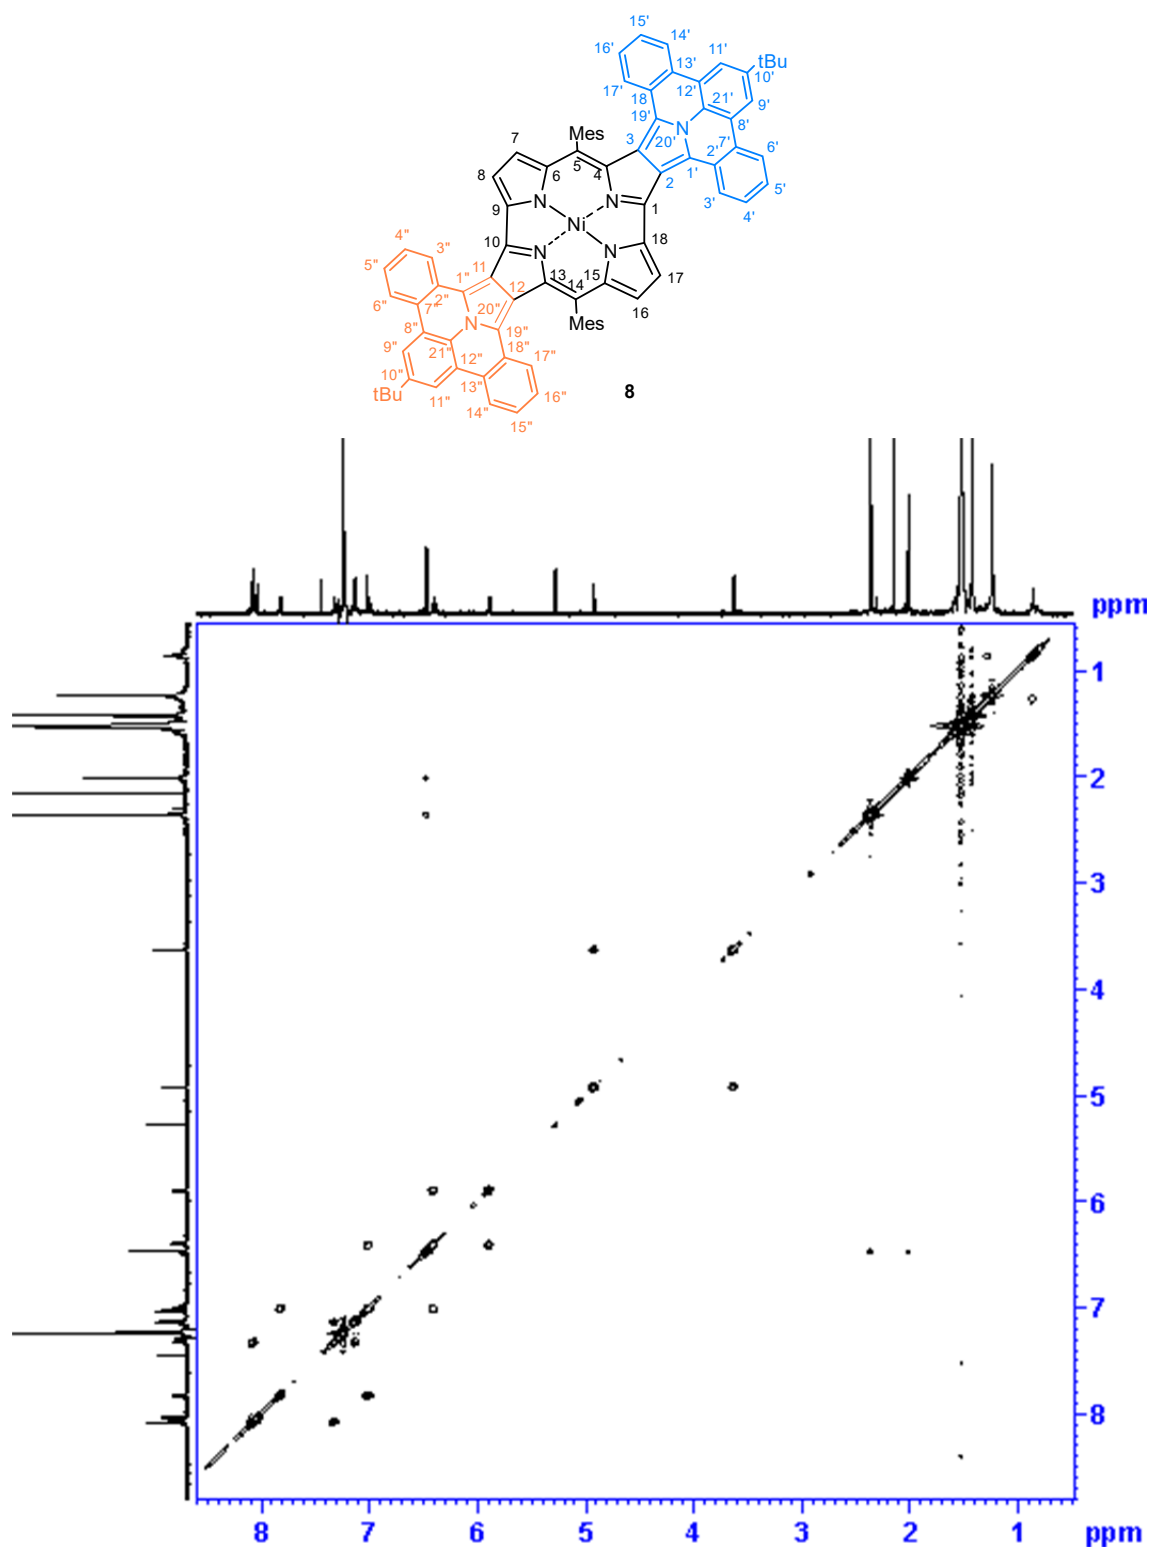

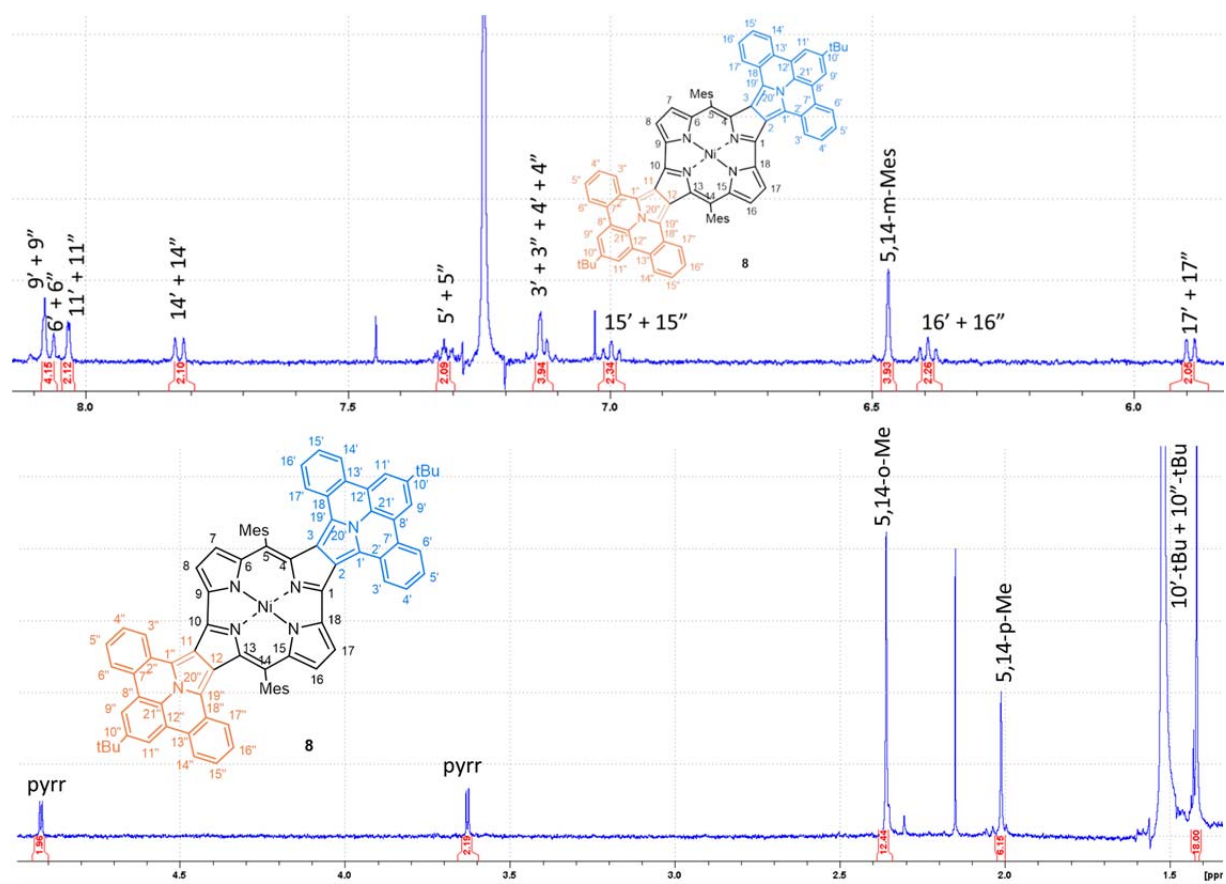

Figure S73. <sup>1</sup>H NMR signal assignments for **8** (500 MHz, 298 K, CDCl<sub>3</sub>).

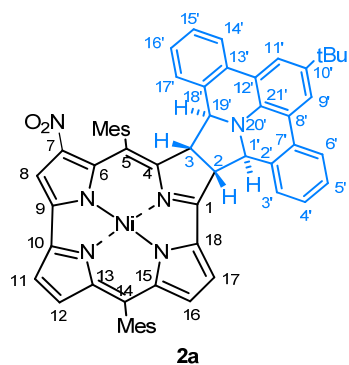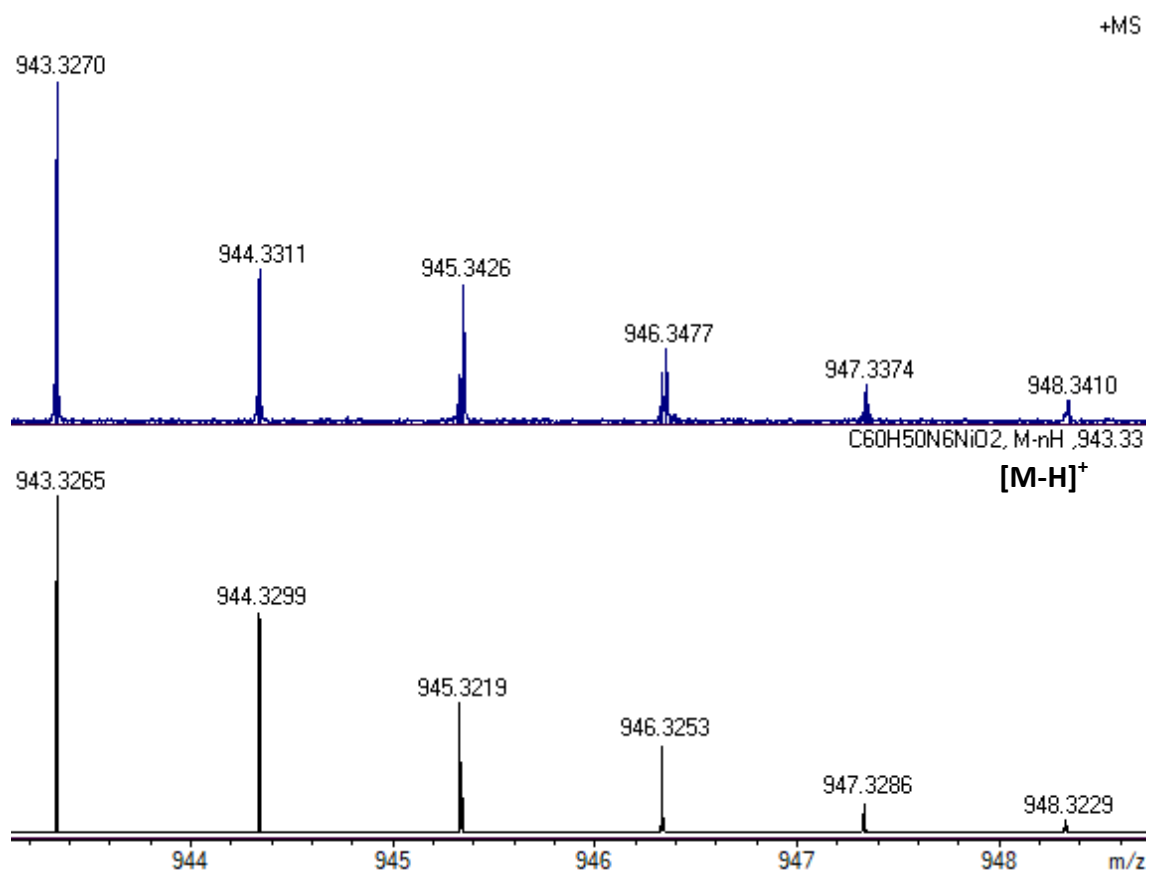

**Figure S74.** ESI(+)-HRMS spectrum of **2a** (experimental: upper trace; simulated: black, bottom trace).

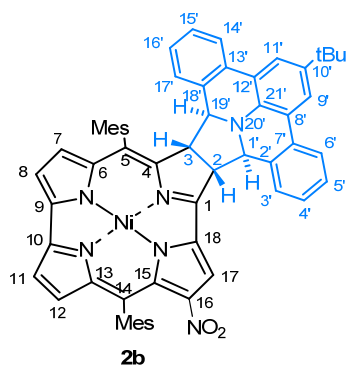

+MS

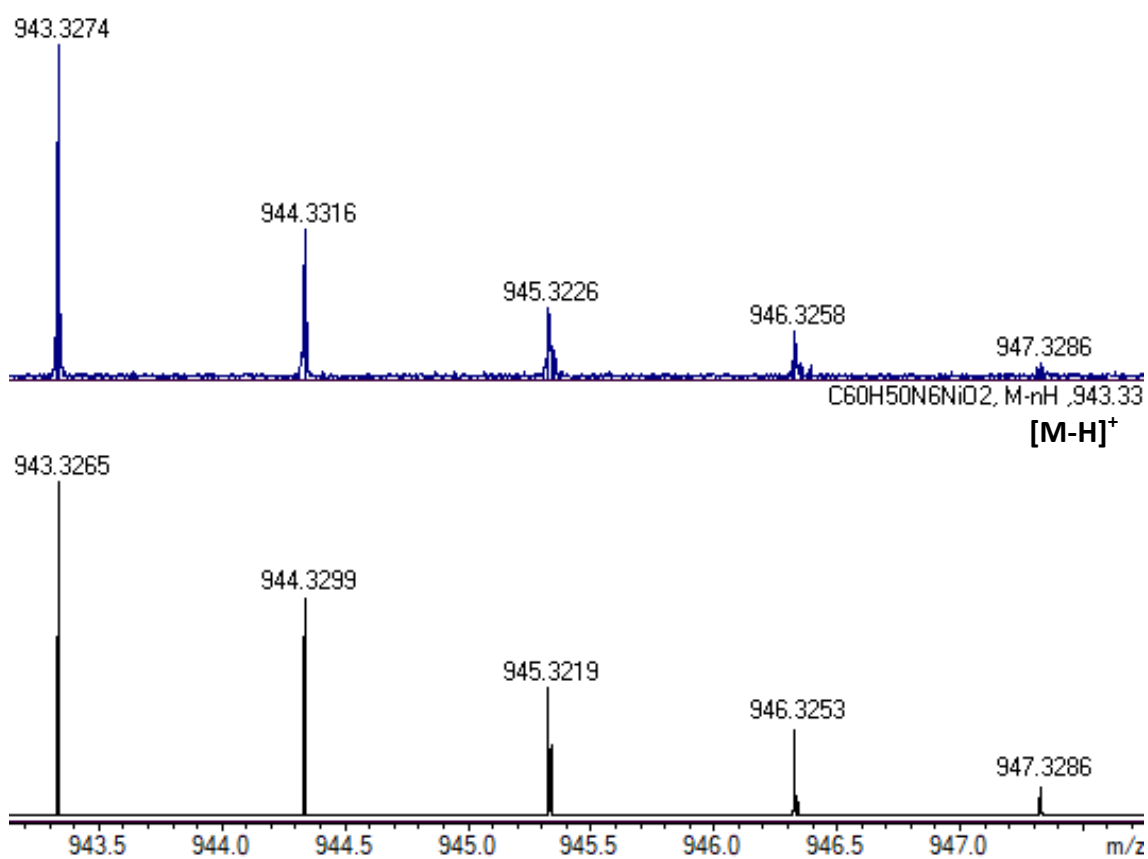

**Figure S75** ESI(+)-HRMS spectrum of **2b** (experimental: upper trace; simulated: black, bottom trace).

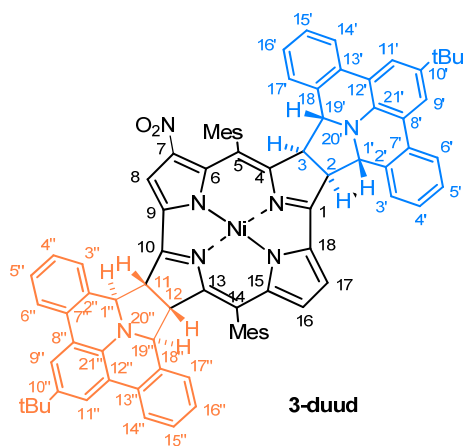

+MS

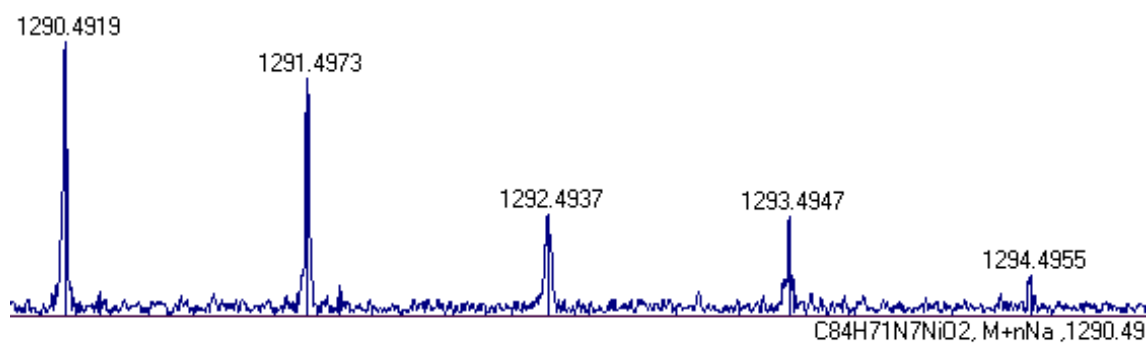

**[M+Na]<sup>+</sup>**

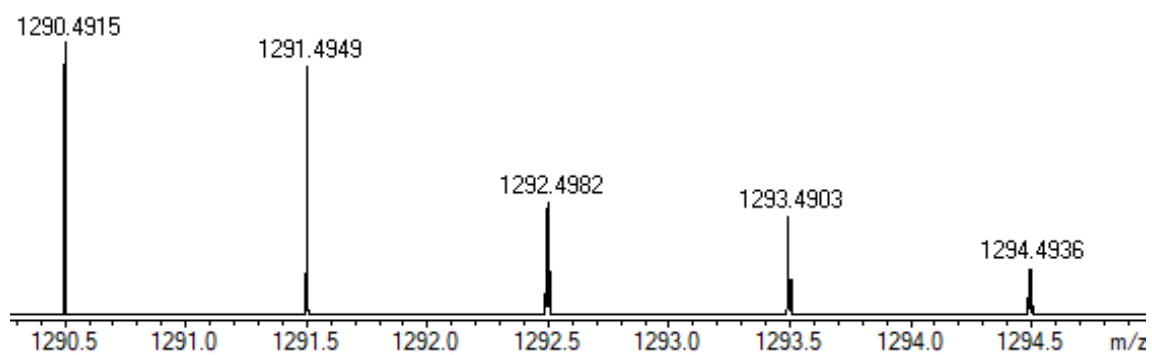

**Figure S76.** ESI(+) HRMS spectrum of **3-duud** (experimental: upper trace; simulated: black, bottom trace).

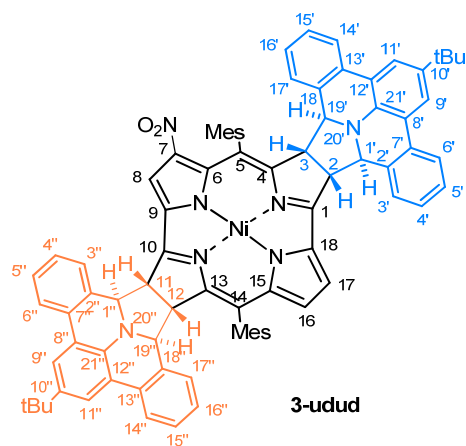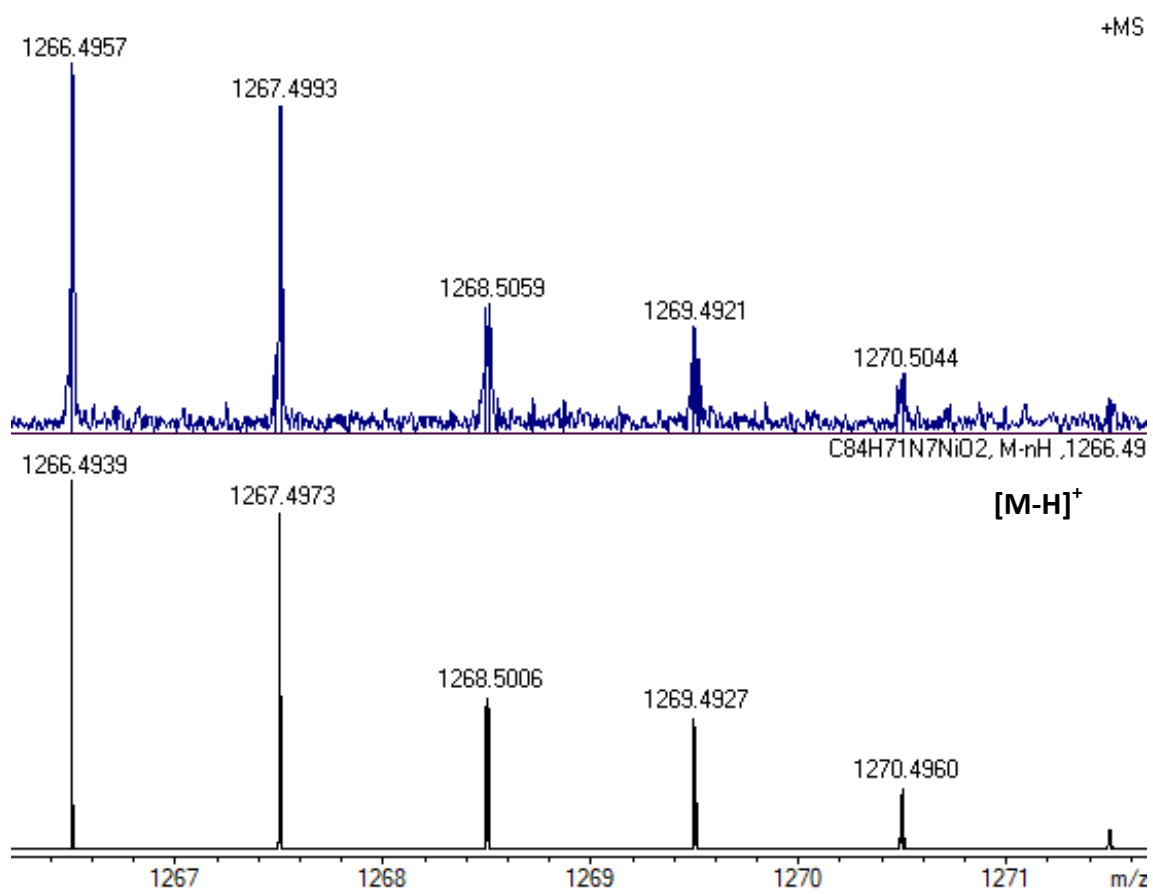

**Figure S77.** ESI(+)-HRMS spectrum of **3-udud** (experimental: upper trace; simulated: black, bottom trace).



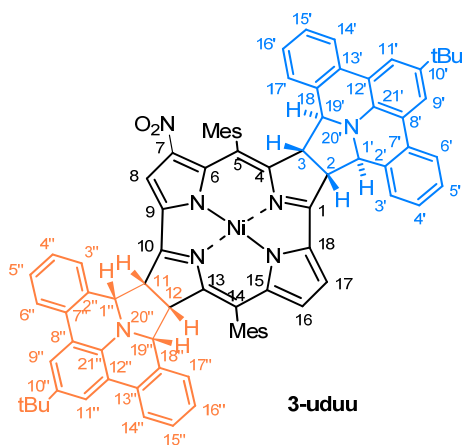

+MS

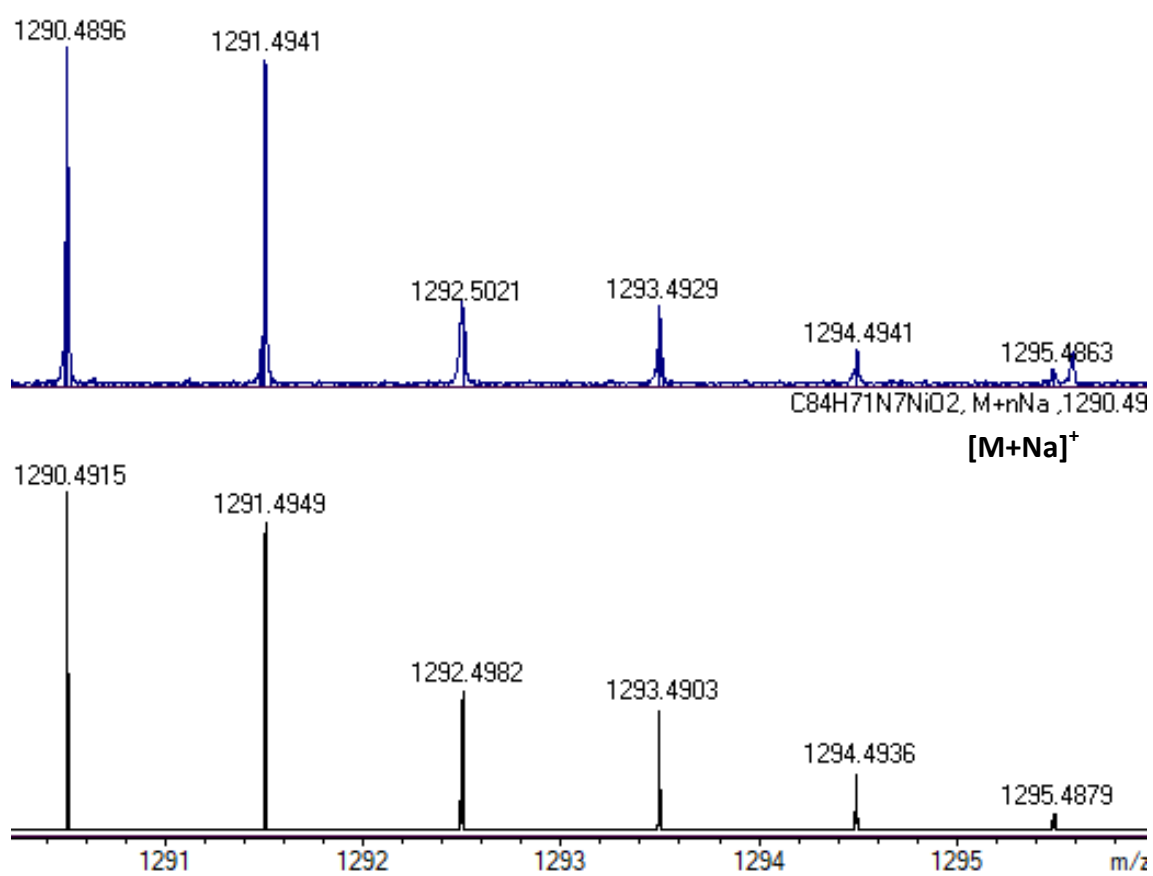

**Figure S78.** ESI(+) HRMS spectrum of **3-uduu** (experimental: upper trace; simulated: black, bottom trace).

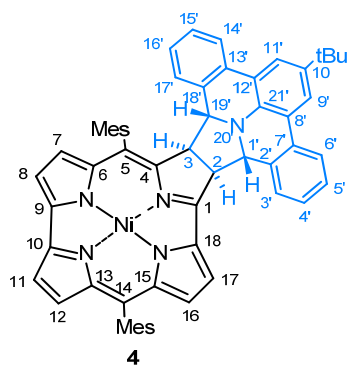

+MS

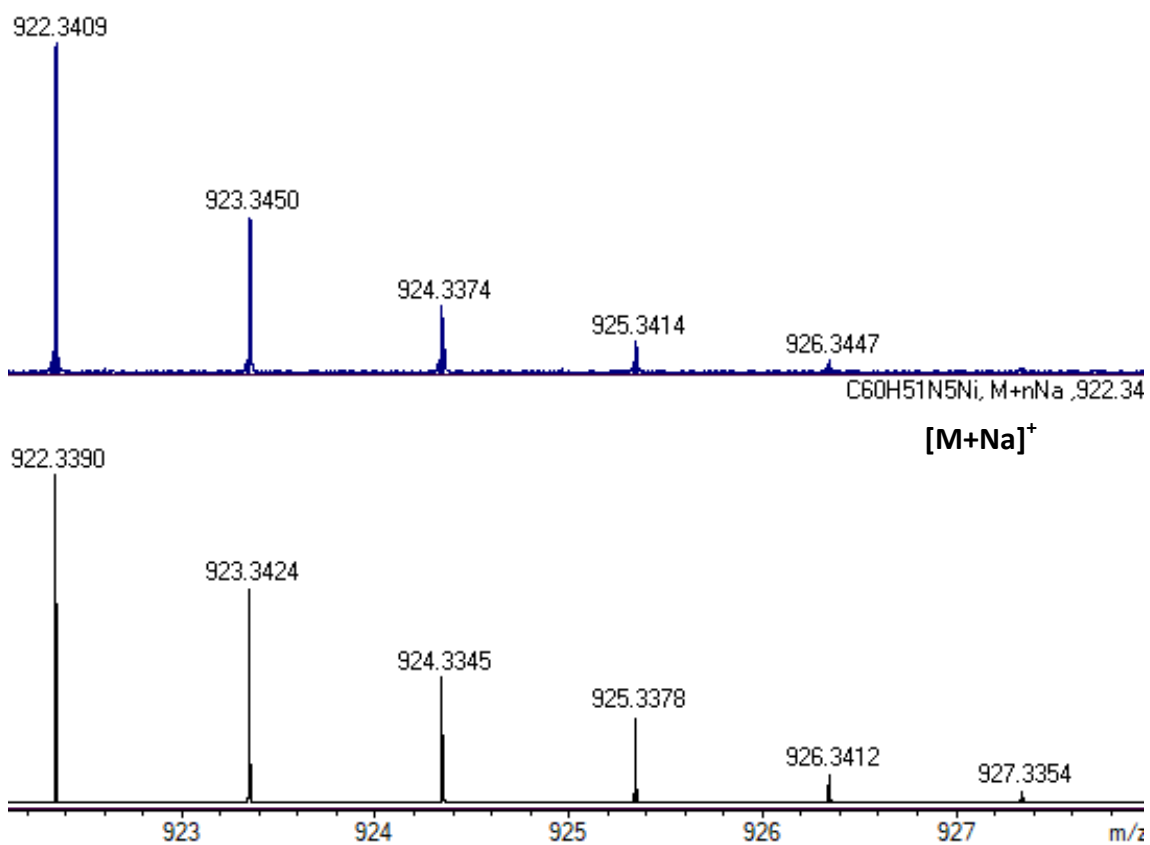

**Figure S79.** ESI(+)-HRMS spectrum of **4** (experimental: upper trace; simulated: black, bottom trace).

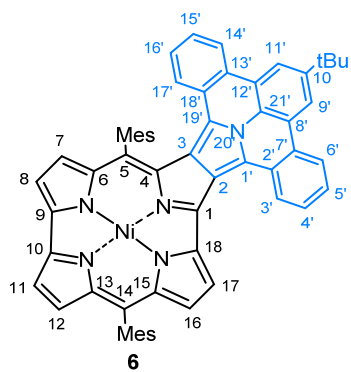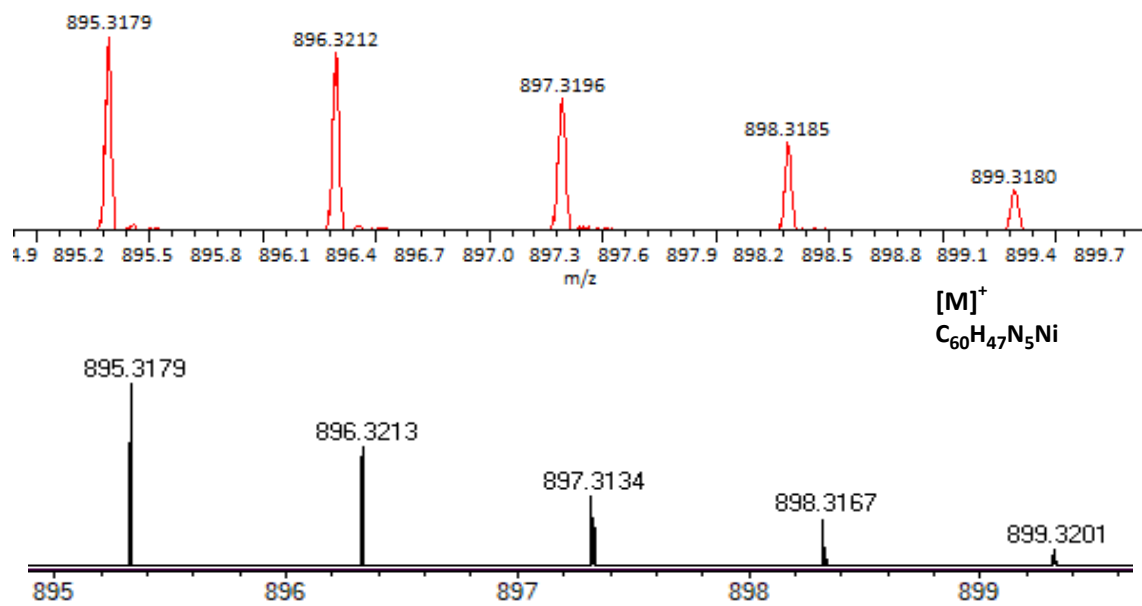

**Figure S80.** ESI(+)-HRMS spectrum of **6** (experimental: upper trace; simulated: black, bottom trace).

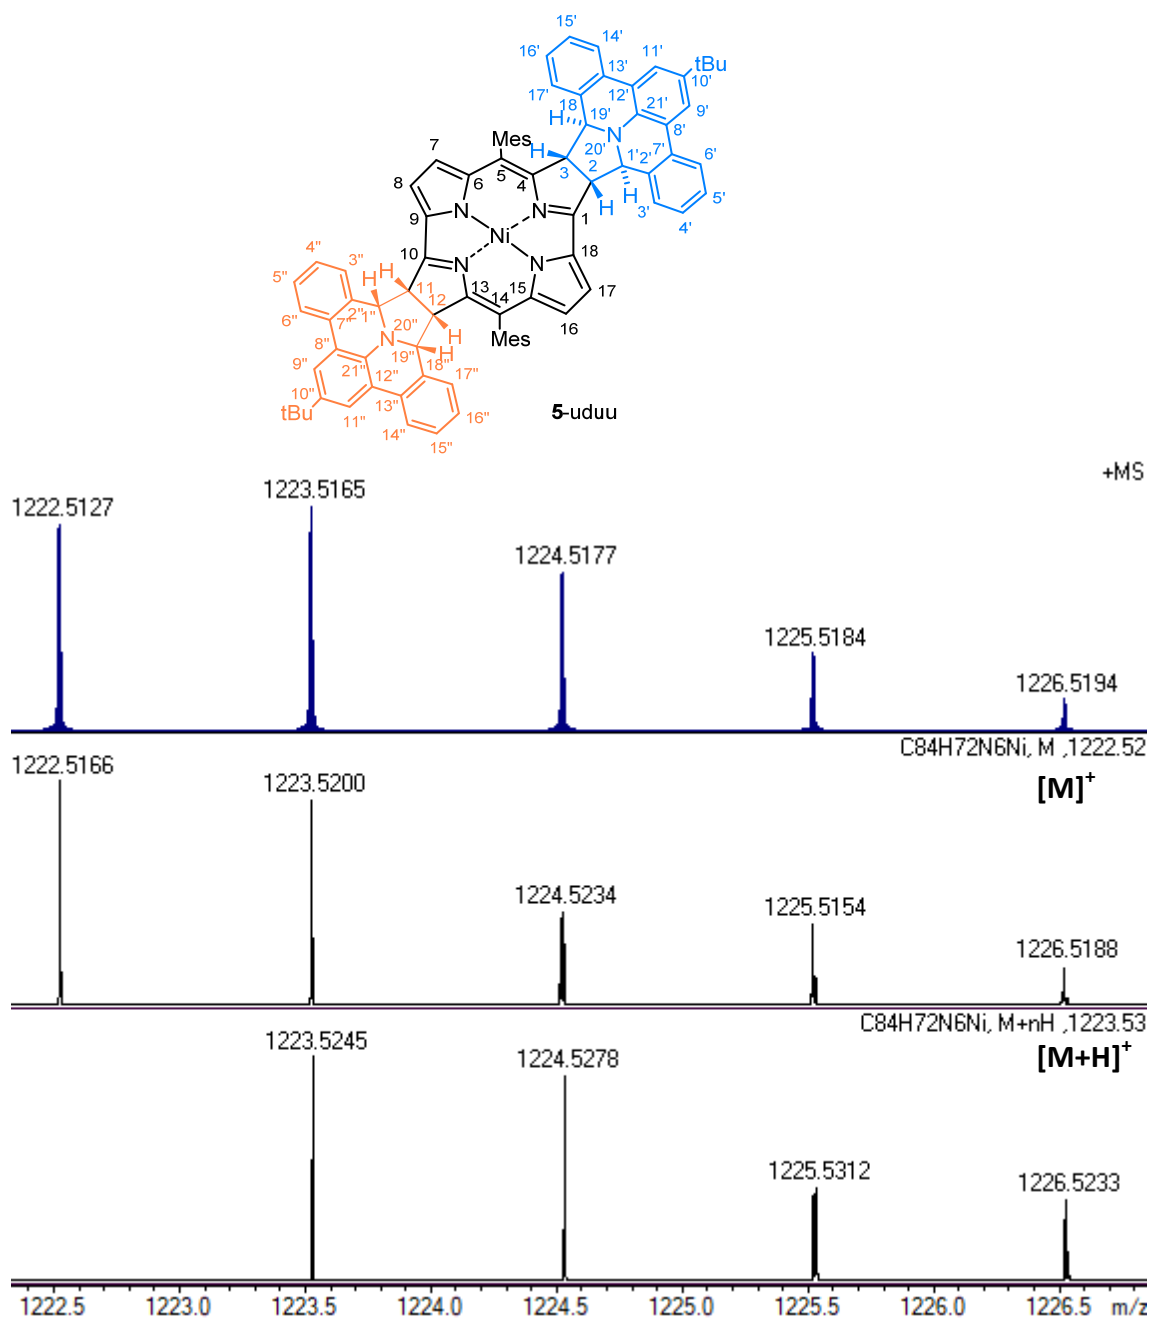

**Figure S81.** ESI(+)-HRMS spectrum of **5-udu** (experimental: upper trace; simulated: black, bottom trace).

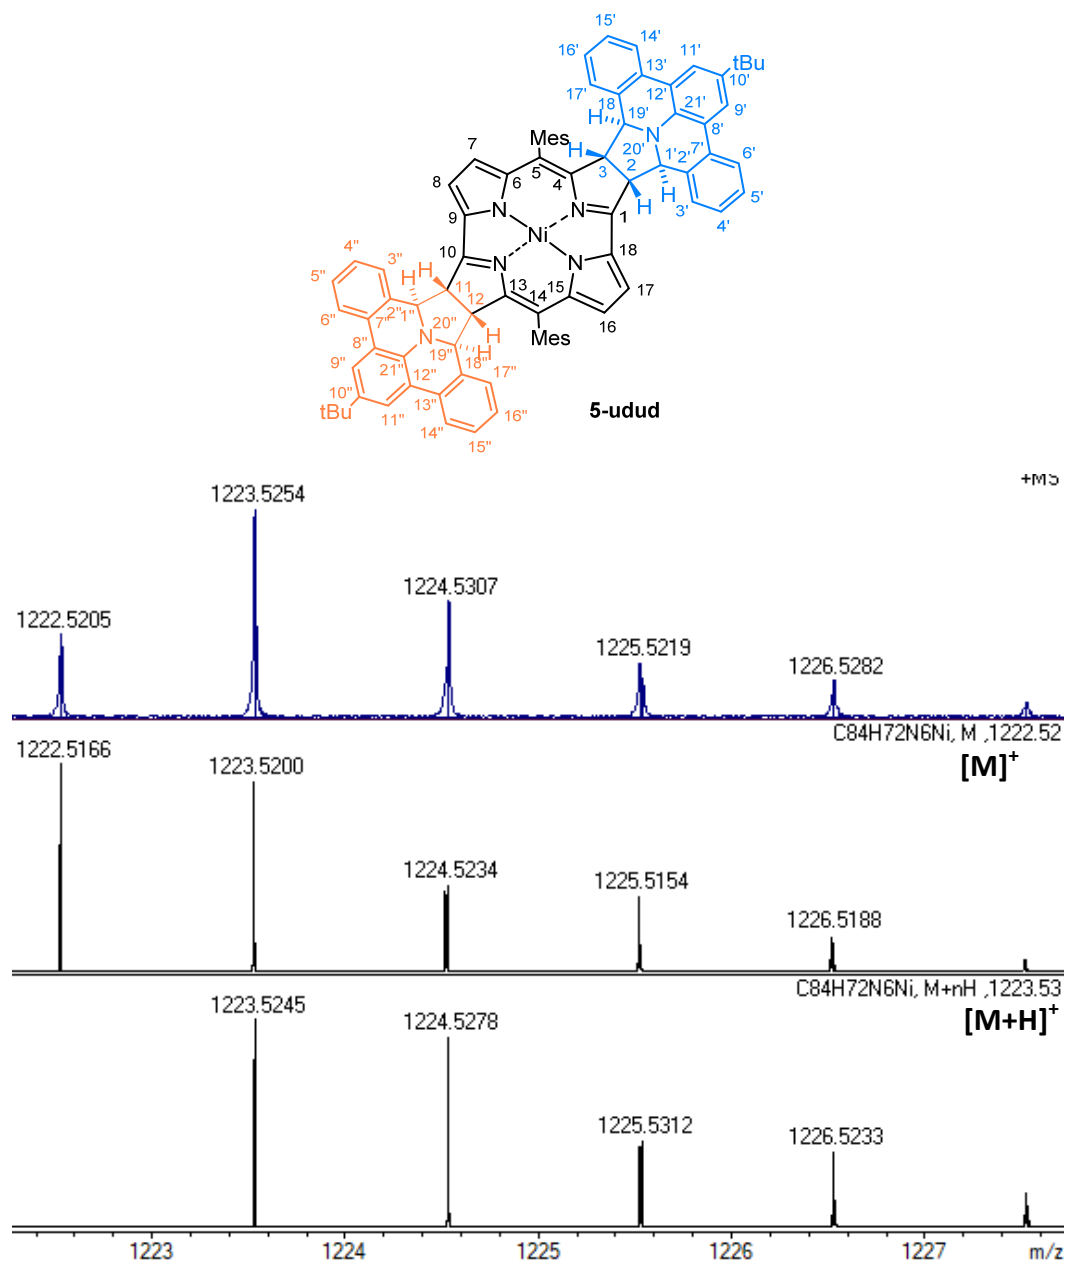

**Figure S82.** ESI(+)-HRMS spectrum of **5-udud** (experimental: upper trace; simulated: black, bottom trace).

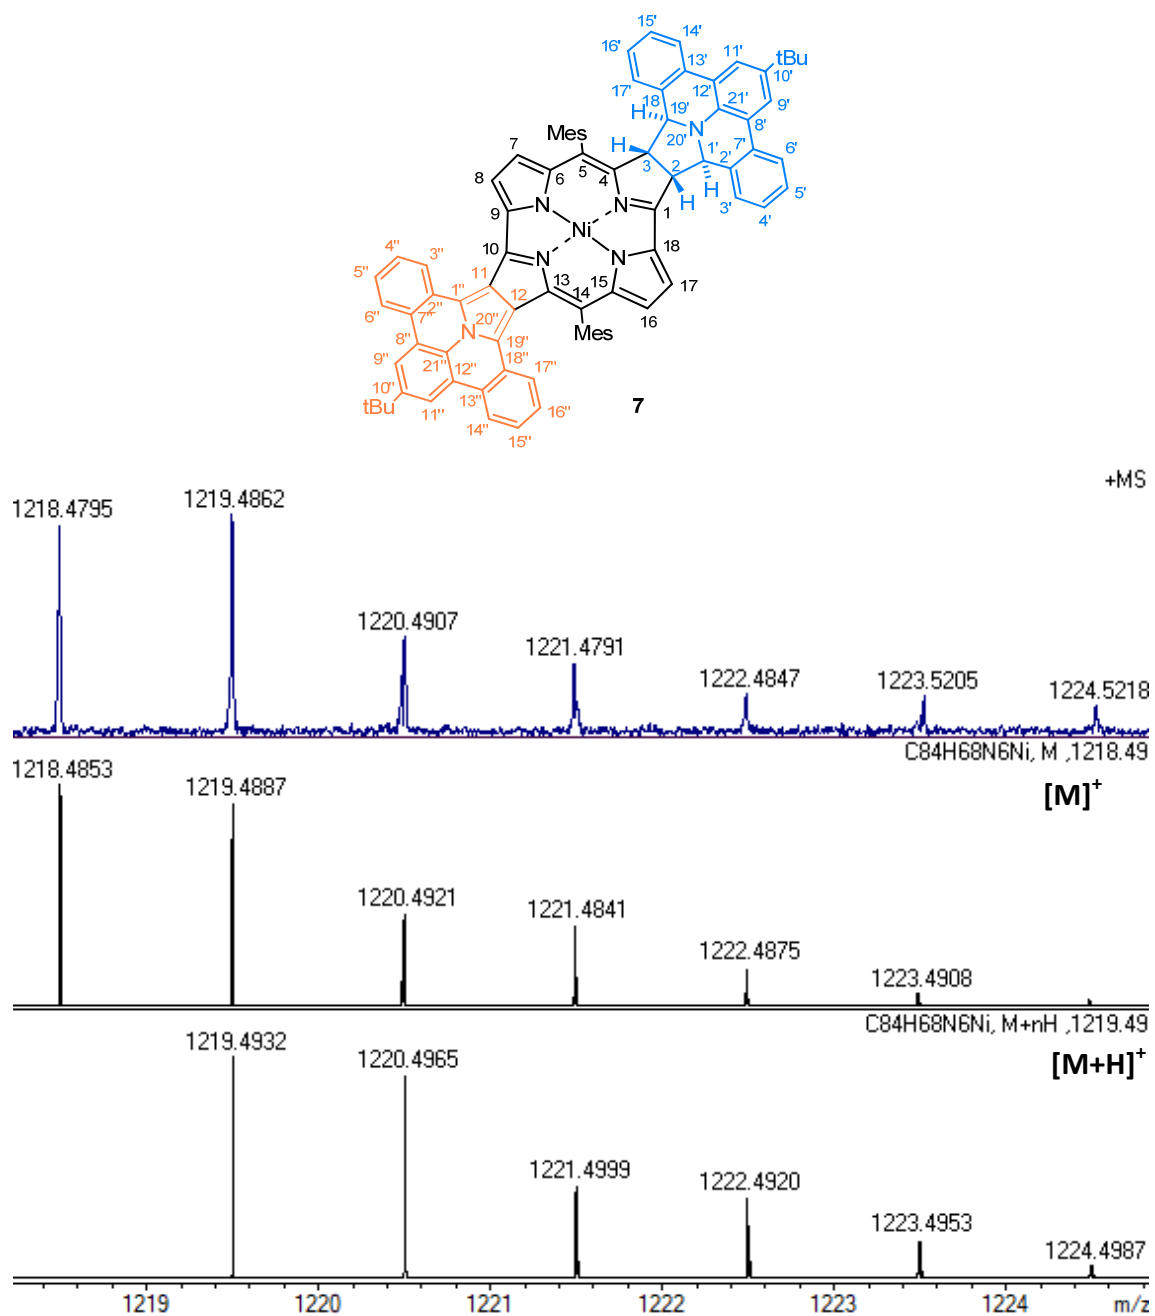

**Figure S83.** ESI(+)-HRMS spectrum of **7** (experimental: upper trace; simulated: black, bottom trace).

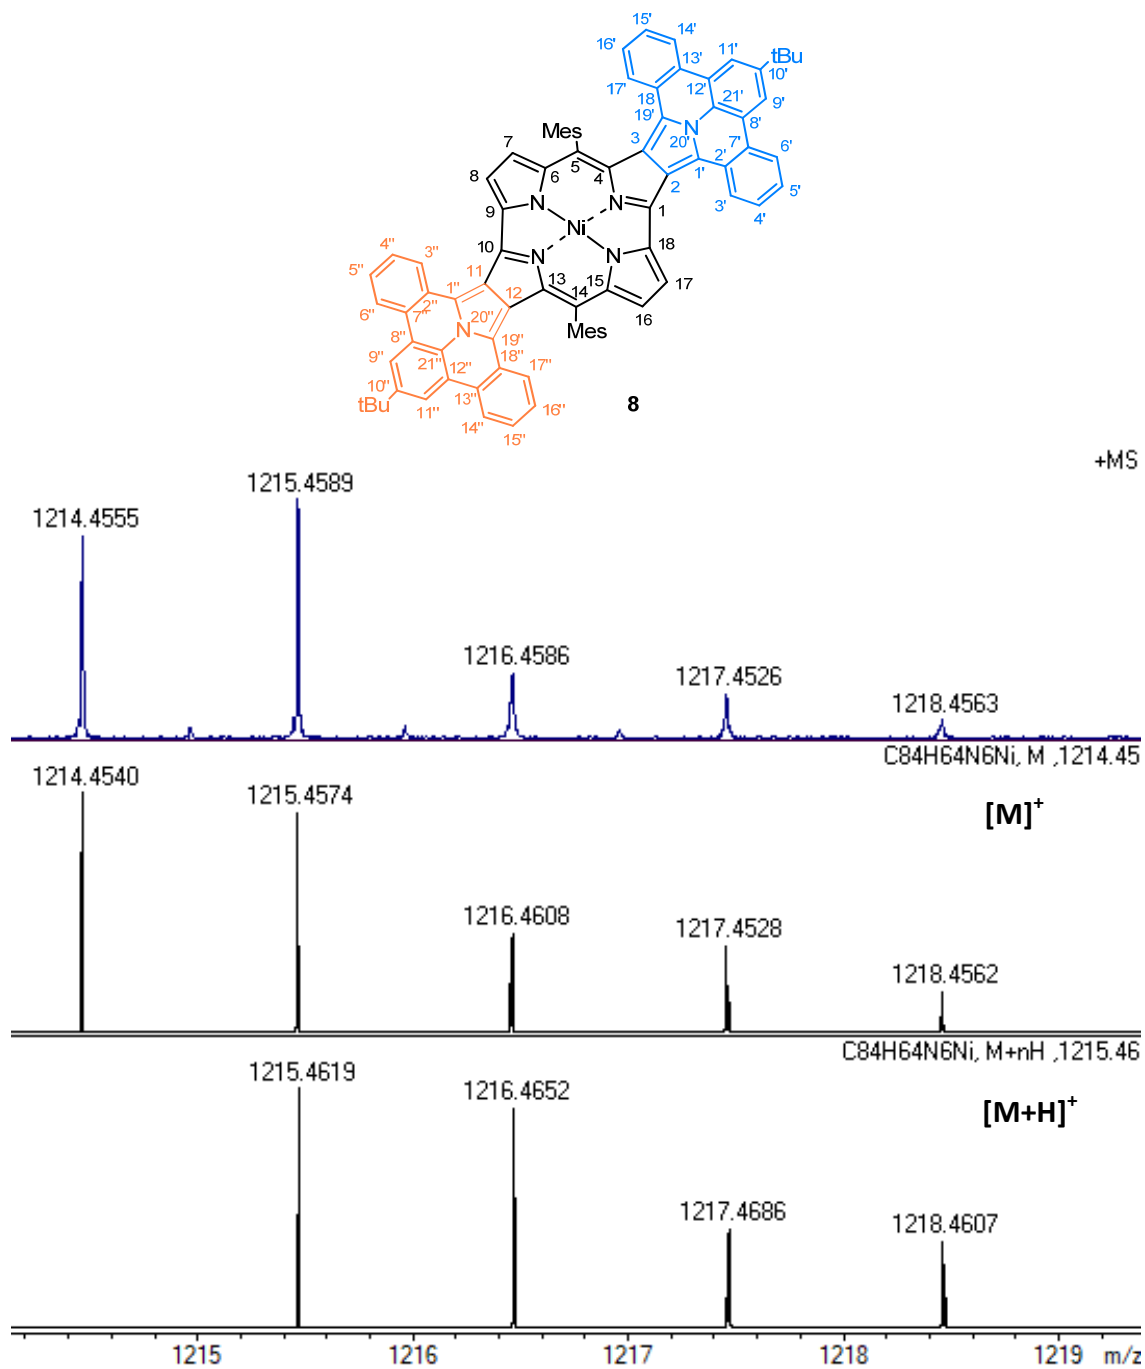

**Figure S84.** ESI(+)-HRMS spectrum of **8** (experimental: upper trace; simulated: black, bottom trace).

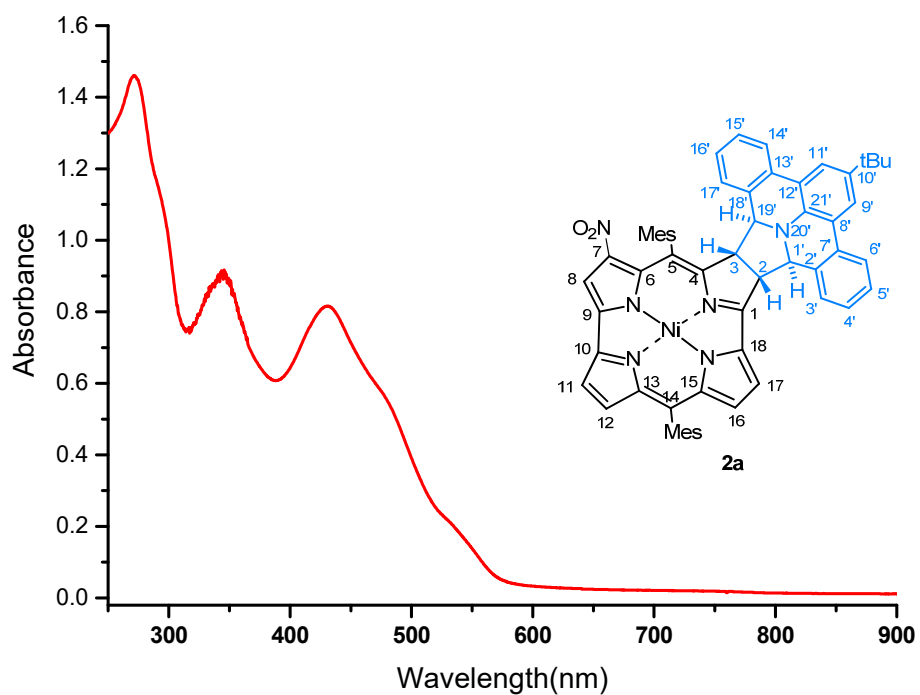

**Figure S85.** UV-vis spectrum of **2a** ( $\text{CH}_2\text{Cl}_2$ ).

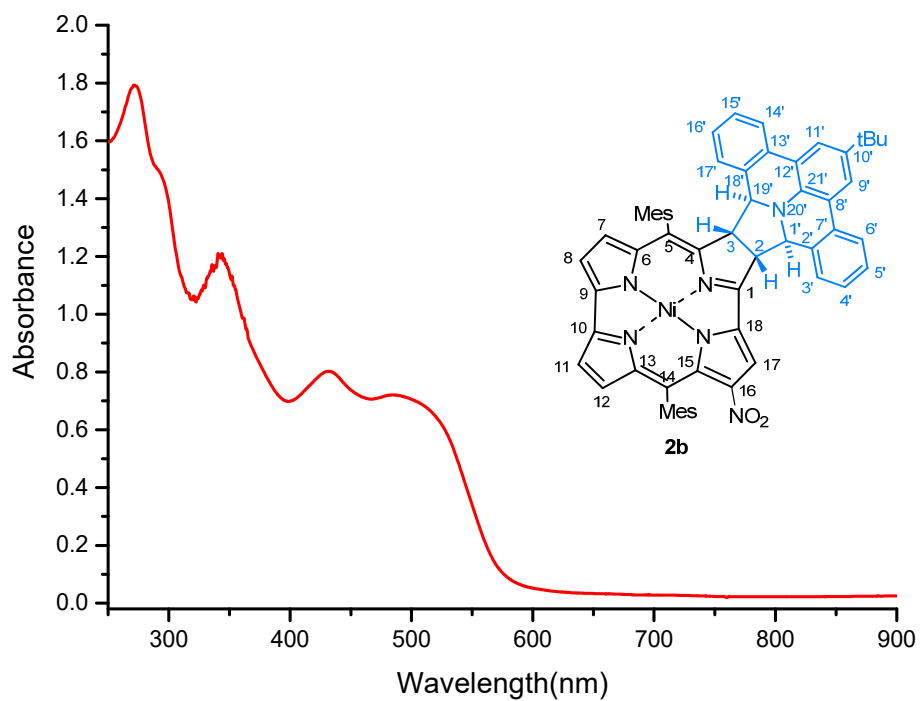

**Figure S86.** UV-vis spectrum of **2b** ( $\text{CH}_2\text{Cl}_2$ ).



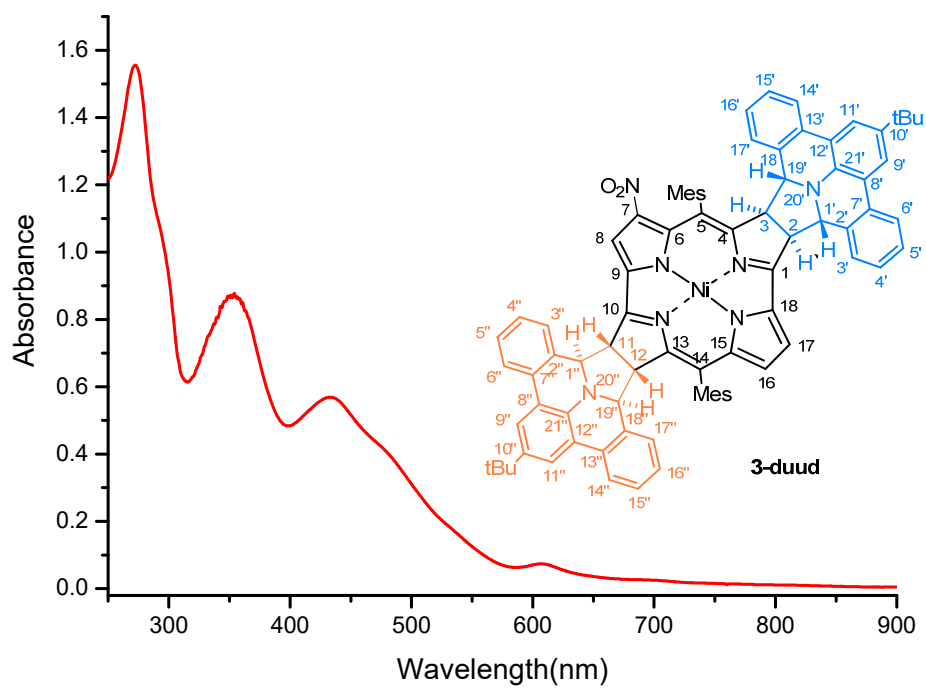

Figure S87. UV-vis spectrum of **3-duud** ( $\text{CH}_2\text{Cl}_2$ ).

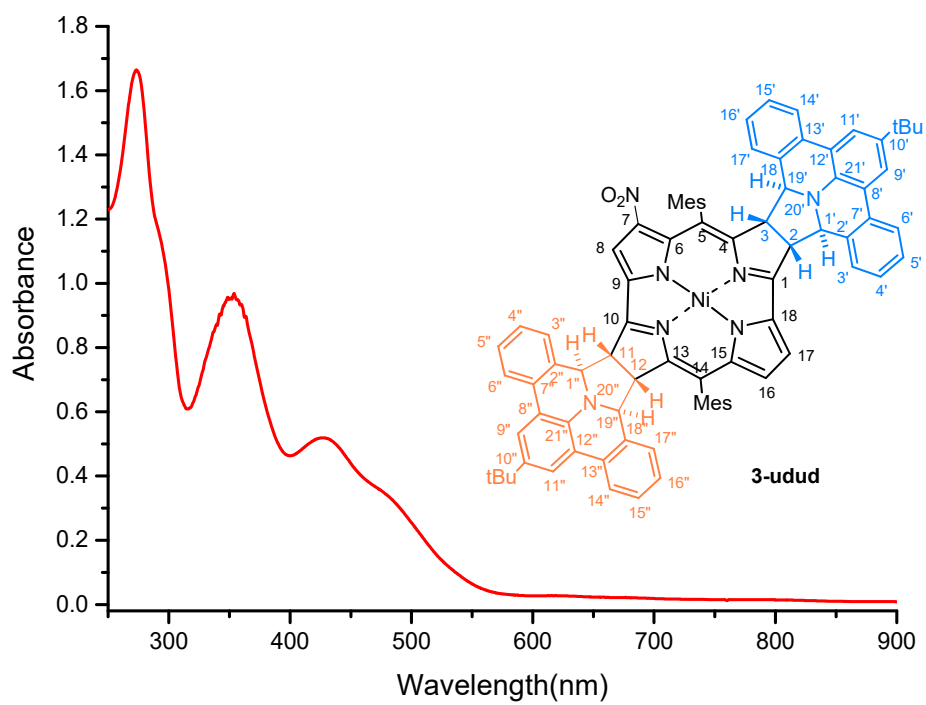

Figure S88. UV-vis spectrum of **3-udud** ( $\text{CH}_2\text{Cl}_2$ ).

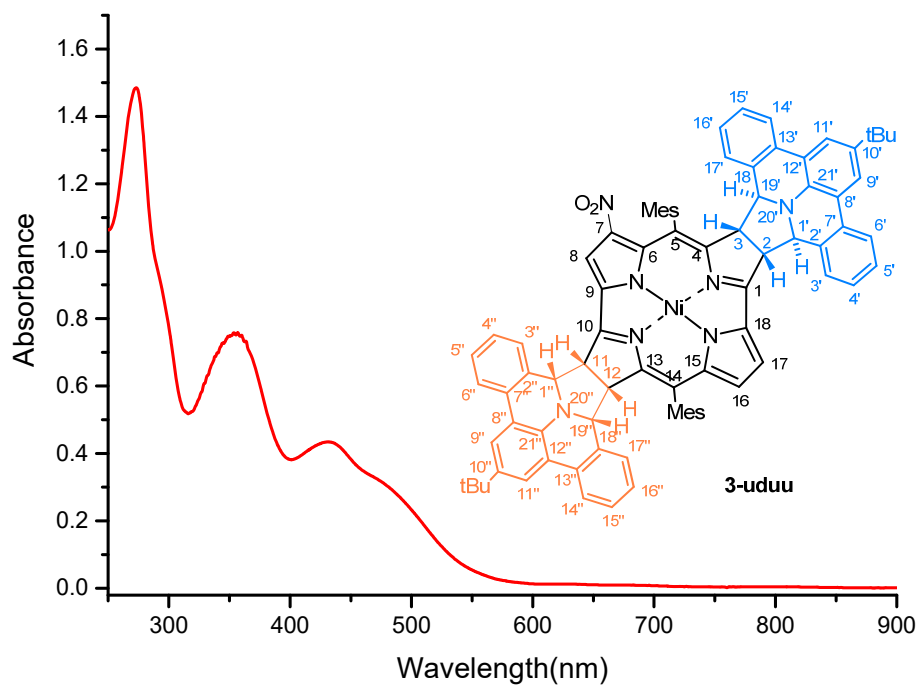

**Figure S89.** UV-vis spectrum of **3-uuu** ( $\text{CH}_2\text{Cl}_2$ ).

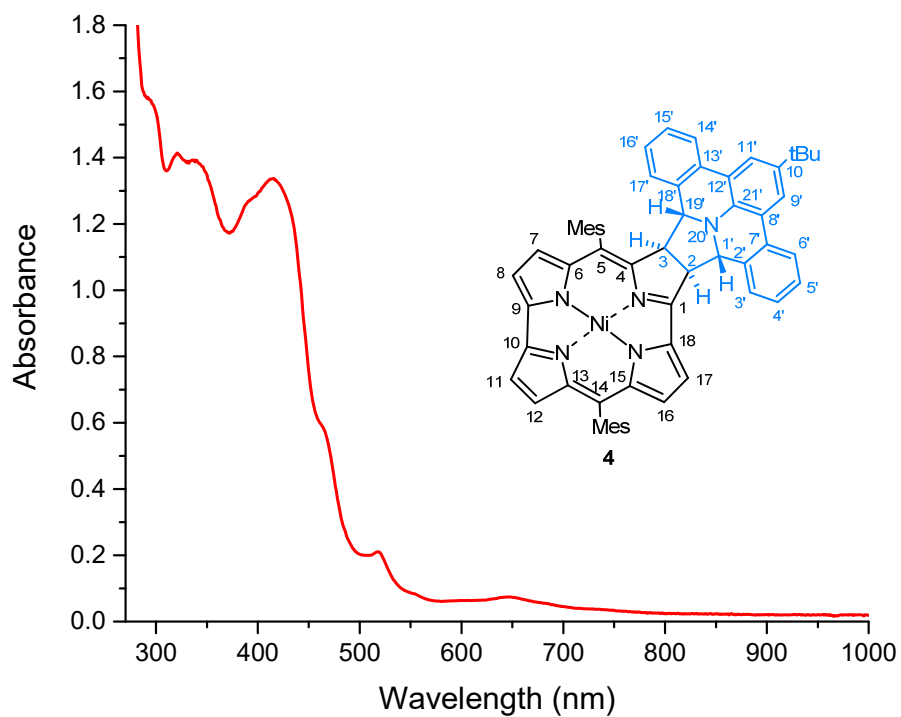

**Figure S90.** UV-vis spectrum of **4** ( $\text{CH}_2\text{Cl}_2$ ).

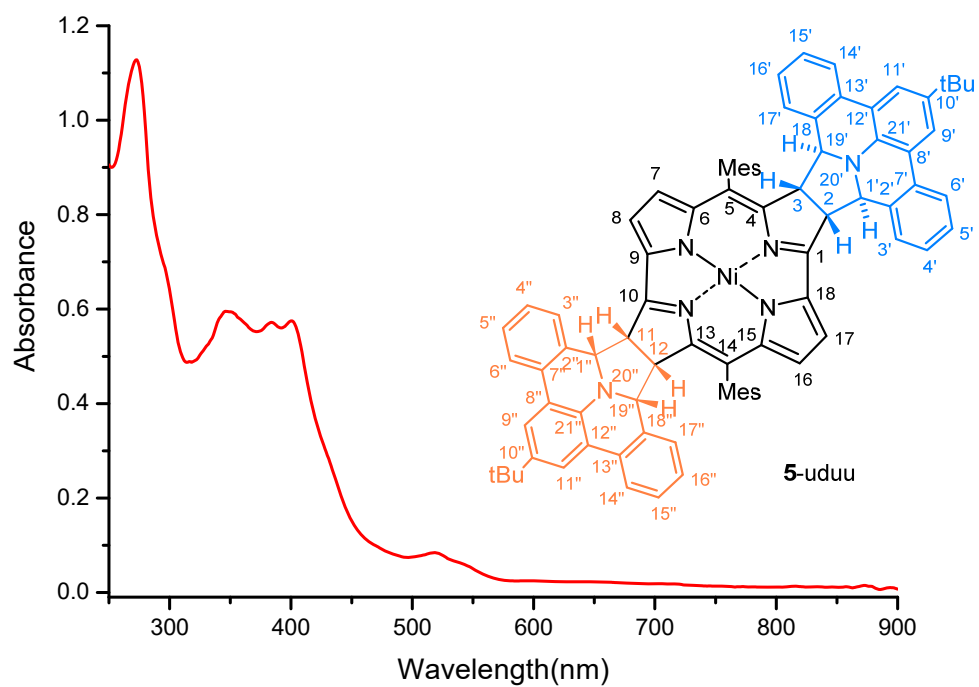

**Figure S91.** UV-vis spectrum of **5-uduu** ( $\text{CH}_2\text{Cl}_2$ ).

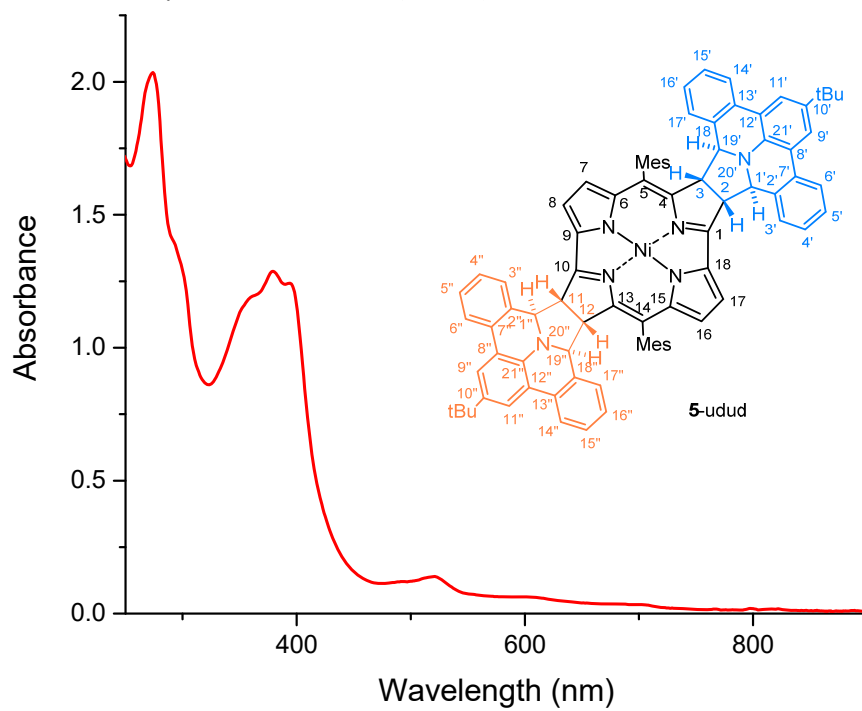

**Figure S92.** UV-vis spectrum of **5-udud** ( $\text{CH}_2\text{Cl}_2$ ).

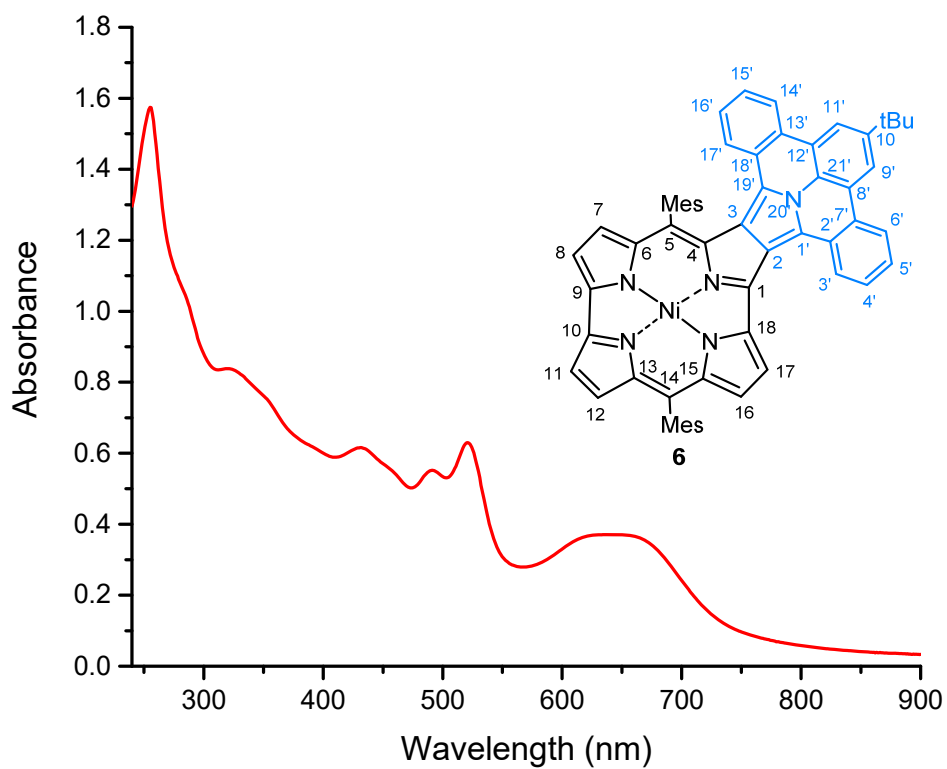

Figure S93. UV-vis spectrum of **6** ( $\text{CH}_2\text{Cl}_2$ ).

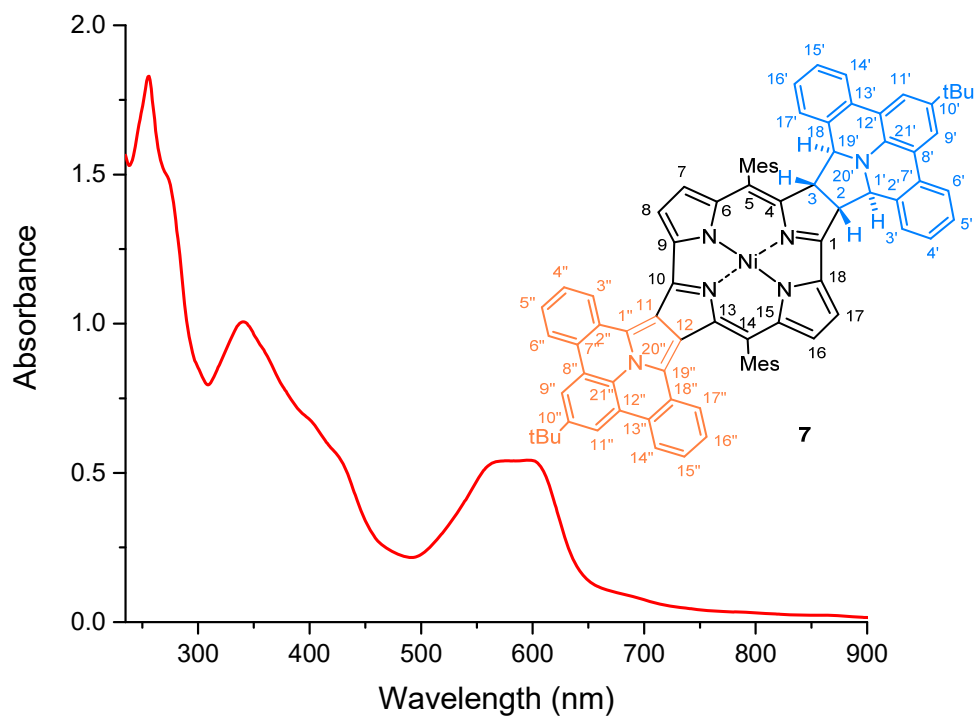

Figure S94. UV-vis spectrum of **7** ( $\text{CH}_2\text{Cl}_2$ ).

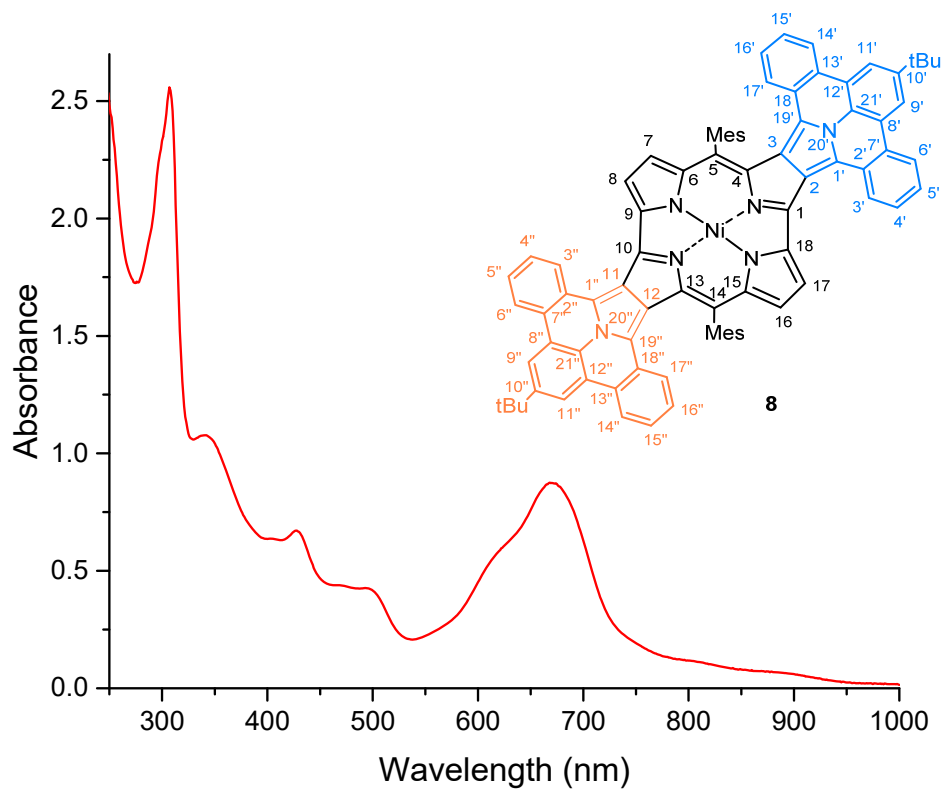

**Figure S95.** UV-vis spectrum of **8** ( $\text{CH}_2\text{Cl}_2$ ).

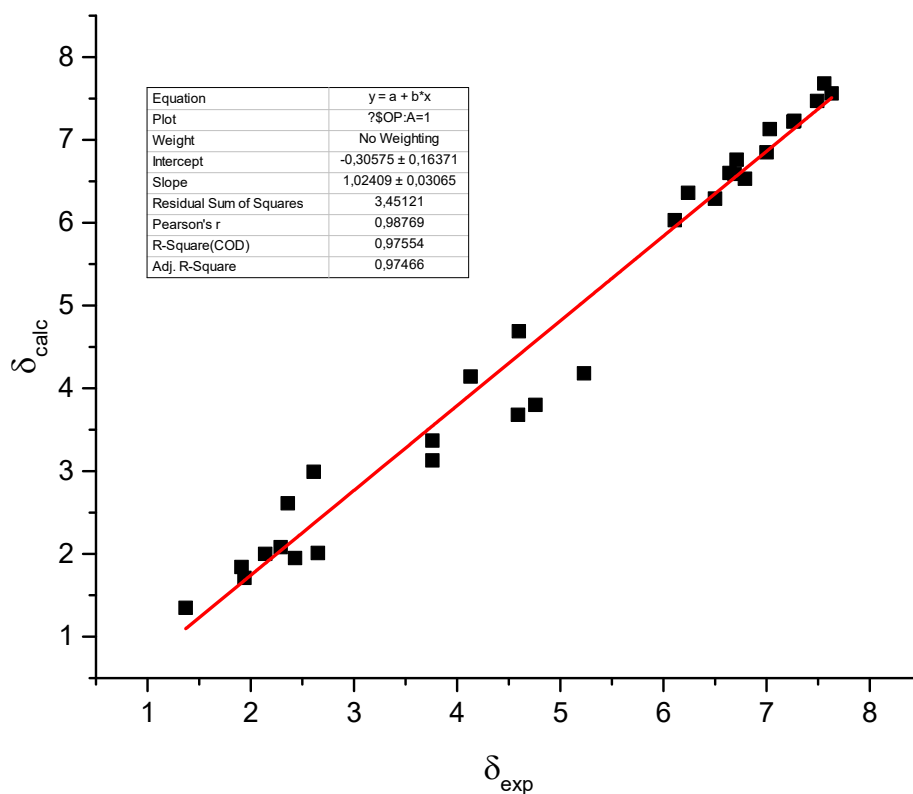

**Figure S96.** Correlations of the  $^1\text{H}$  NMR experimental chemical shifts with those calculated by GIAO approach for the DFT-optimized structures of **2a**.

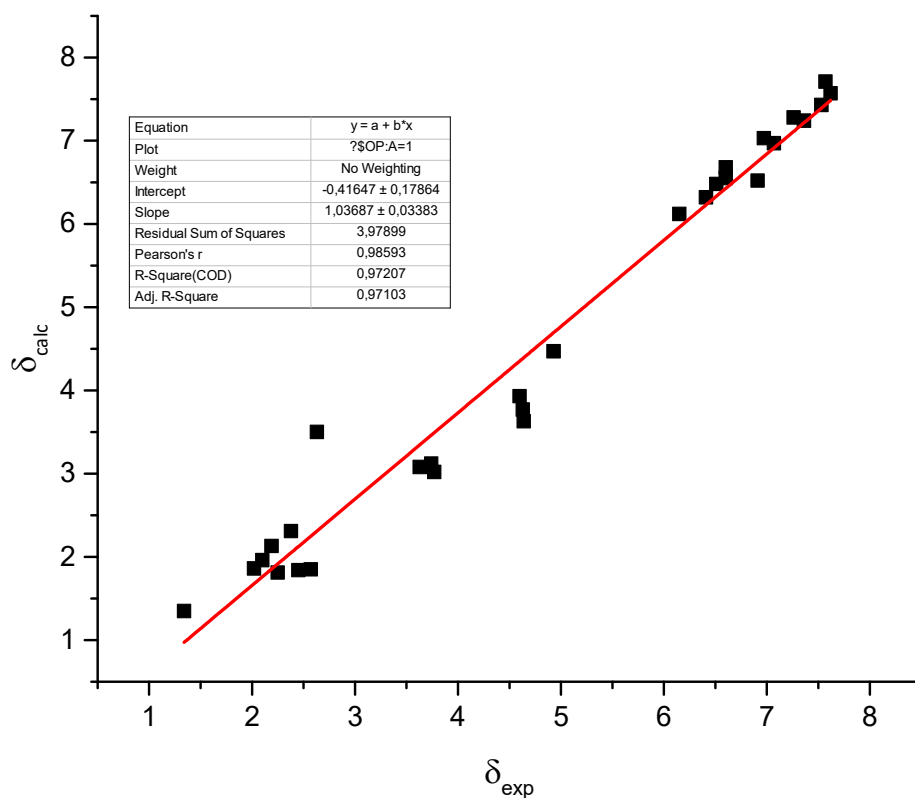

**Figure S97.** Correlations of the  $^1\text{H}$  NMR experimental chemical shifts with those calculated by GIAO approach for the DFT-optimized structures of **2b**.

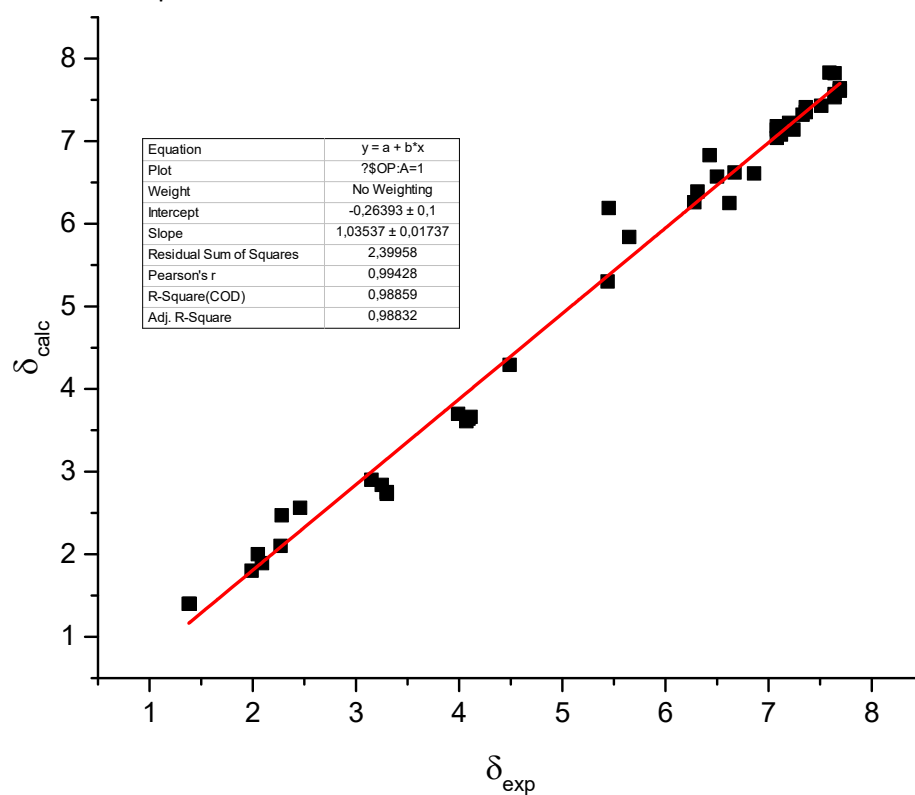

**Figure S98.** Correlations of the  $^1\text{H}$  NMR experimental chemical shifts with those calculated by GIAO approach for the DFT-optimized structures of **3-duud**.

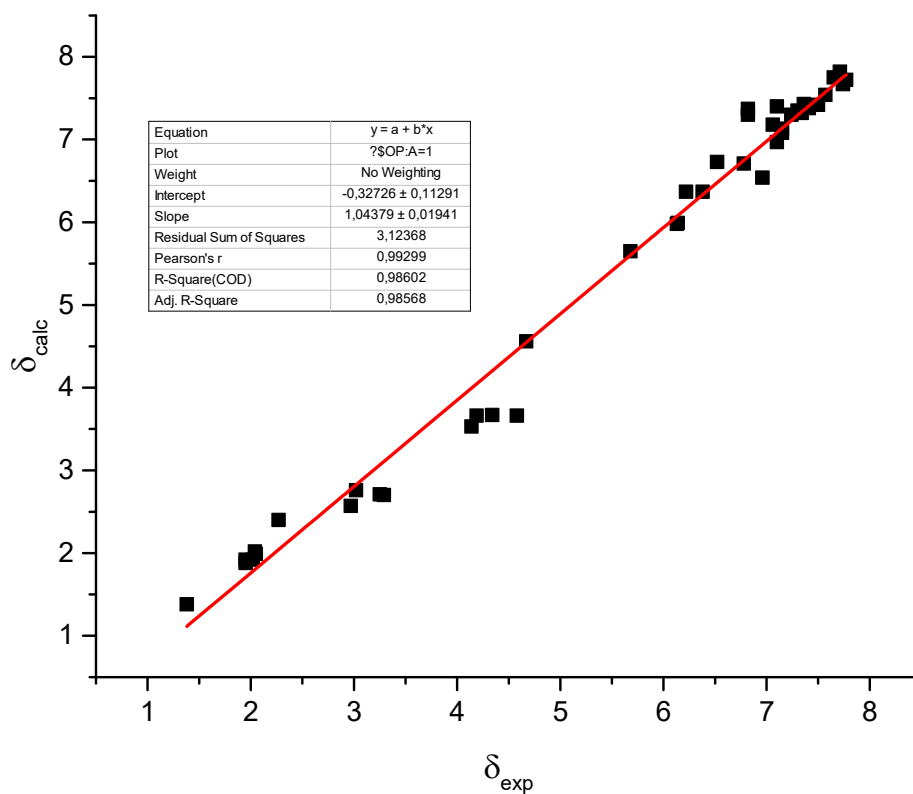

**Figure S99.** Correlations of the  $^1\text{H}$  NMR experimental chemical shifts with those calculated by GIAO approach for the DFT-optimized structures of **3-udud**.

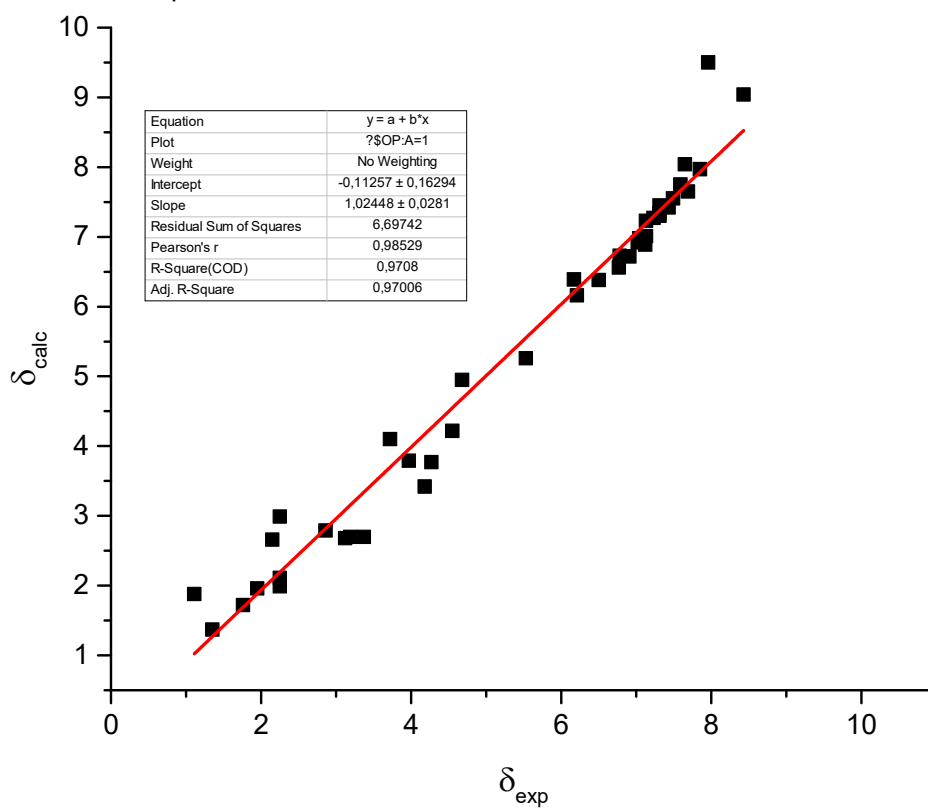

**Figure S100.** Correlations of the  $^1\text{H}$  NMR experimental chemical shifts with those calculated by GIAO approach for the DFT-optimized structures of **3-uduu**.

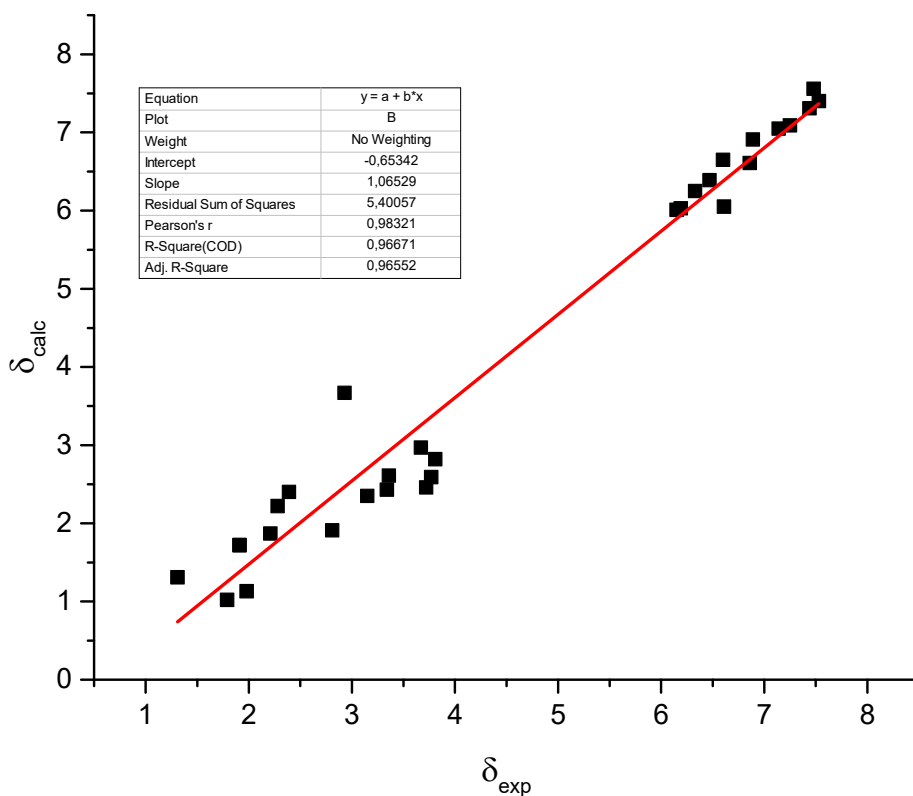

**Figure S101.** Correlations of the  $^1\text{H}$  NMR experimental chemical shifts with those calculated by GIAO approach for the DFT-optimized structures of **4**.

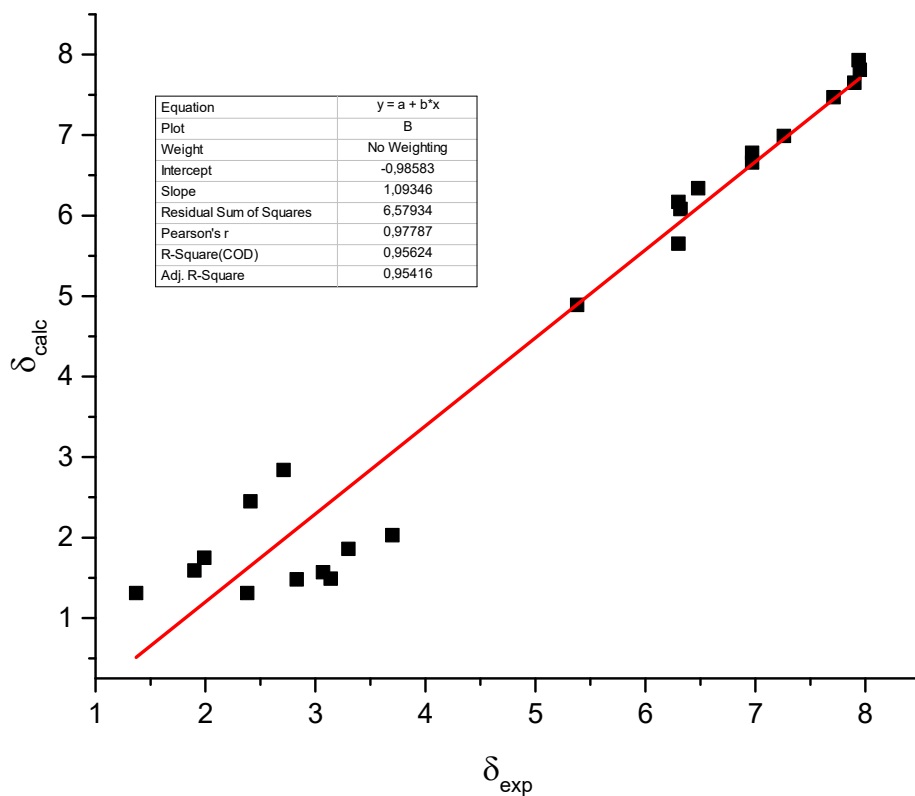

**Figure S102.** Correlations of the  $^1\text{H}$  NMR experimental chemical shifts with those calculated by GIAO approach for the DFT-optimized structures of **6**.



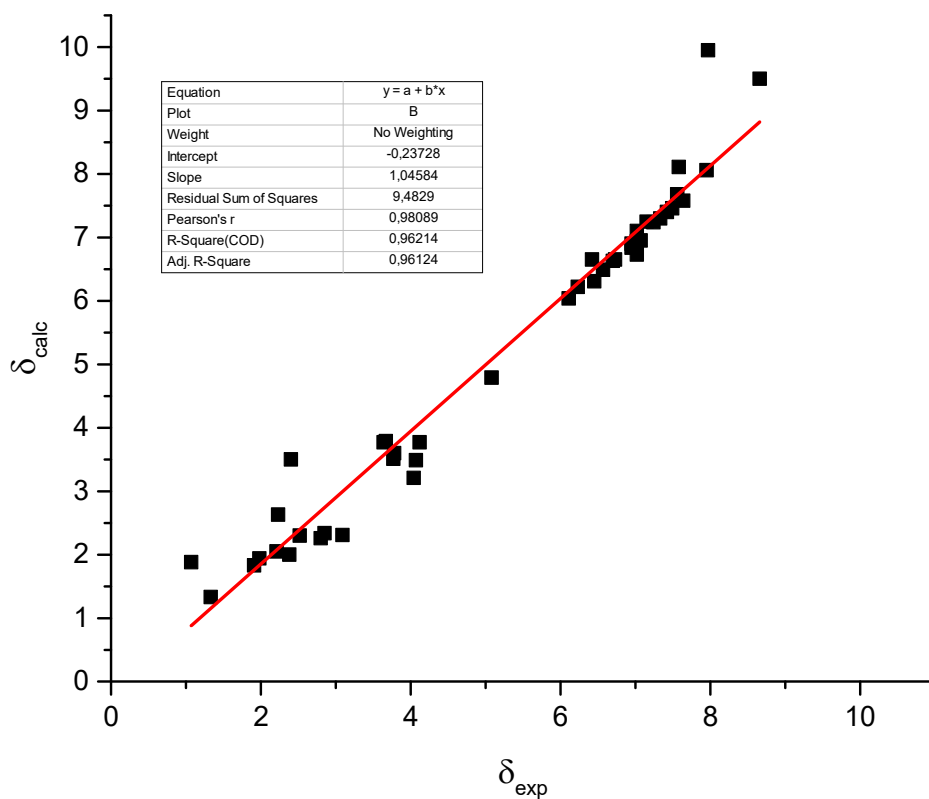

**Figure S103.** Correlations of the  $^1\text{H}$  NMR experimental chemical shifts with those calculated by GIAO approach for the DFT-optimized structures of **5-uduu**.

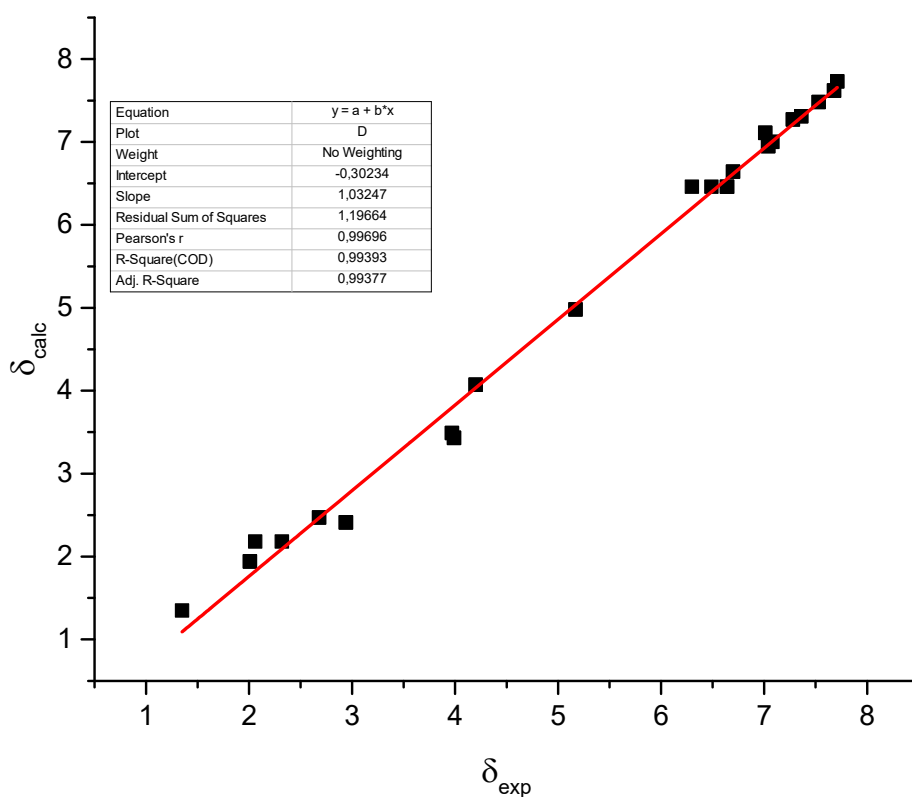

**Figure S104.** Correlations of the  $^1\text{H}$  NMR experimental chemical shifts with those calculated by GIAO approach for the DFT-optimized structures of **5-udud**.

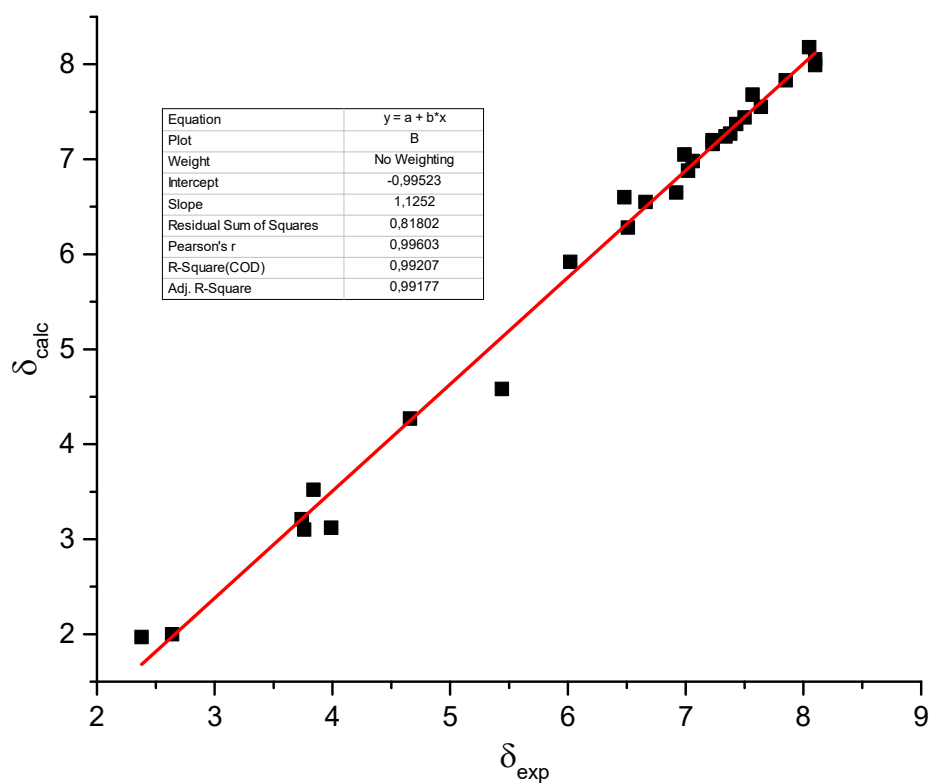

**Figure S105.** Correlations of the  $^1\text{H}$  NMR experimental chemical shifts with those calculated by GIAO approach for the DFT-optimized structures of **7**.

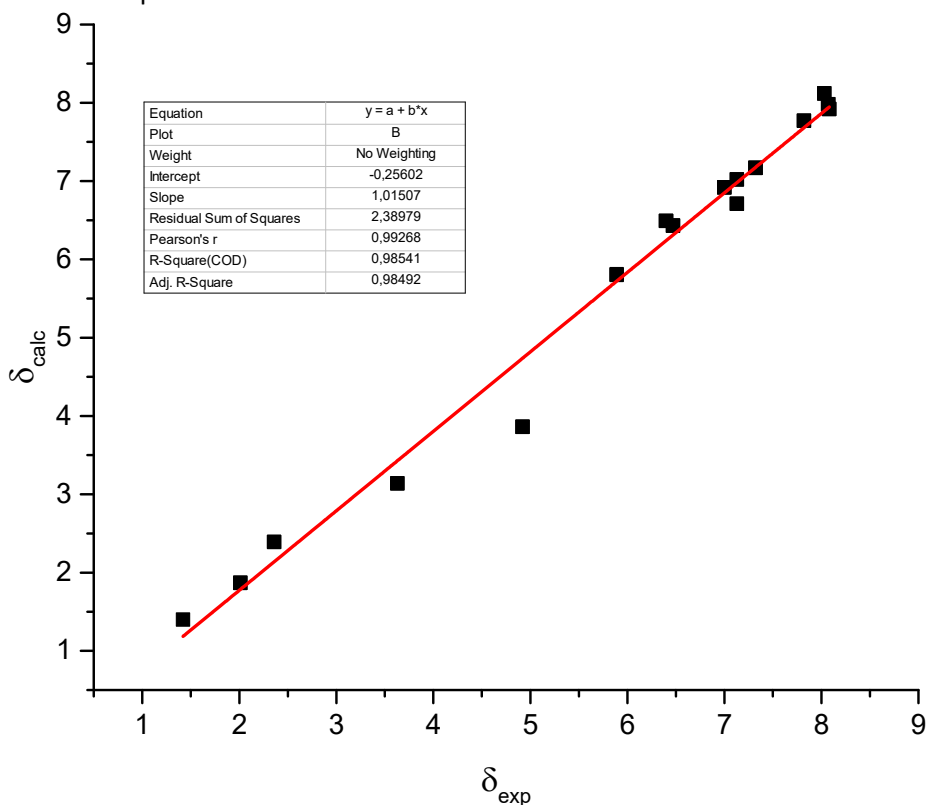

**Figure S106.** Correlations of the  $^1\text{H}$  NMR experimental chemical shifts with those calculated by GIAO approach for the DFT-optimized structures of **8a**.

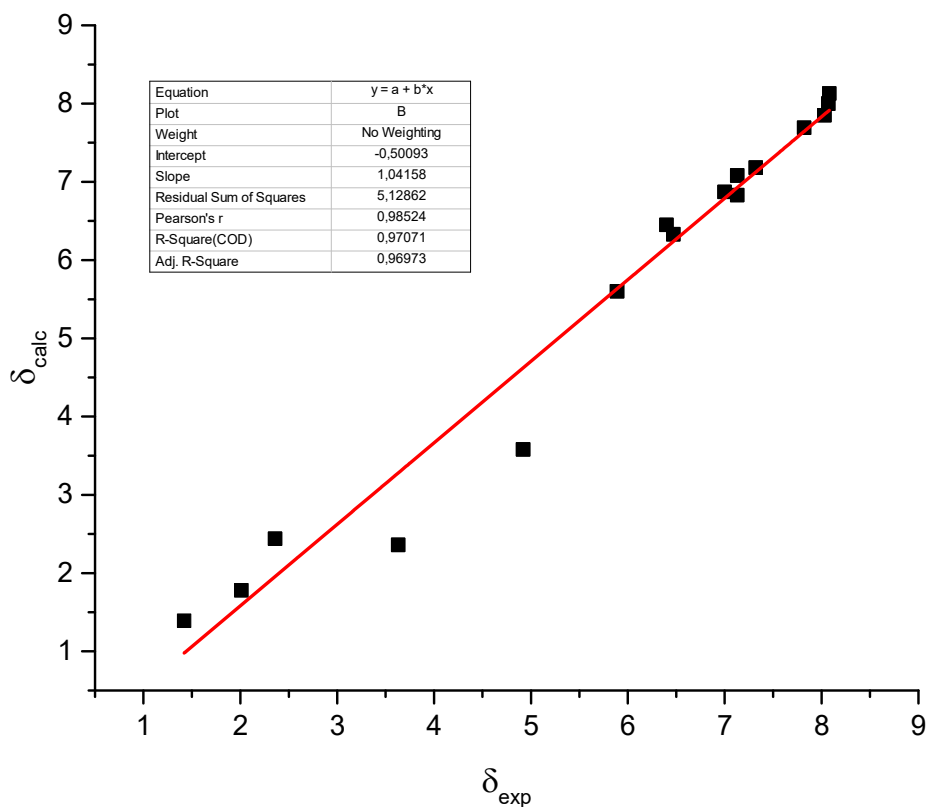

**Figure S107.** Correlations of the  $^1\text{H}$  NMR experimental chemical shifts with those calculated by GIAO approach for the DFT-optimized structures of **8b**.

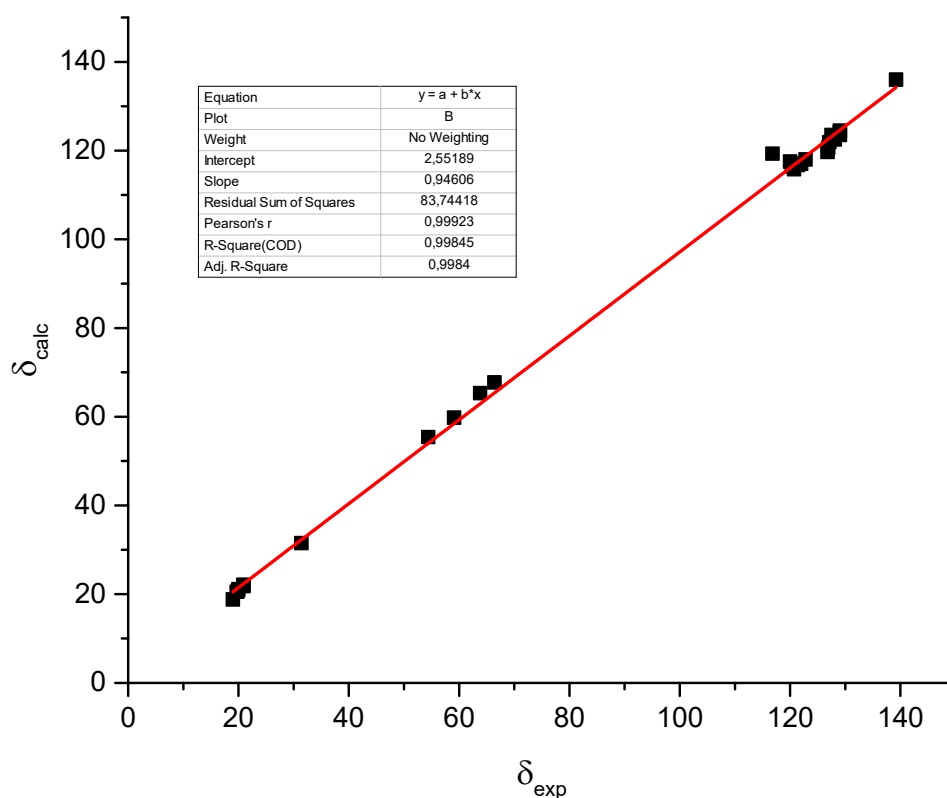

**Figure S108.** Correlations of the  $^{13}\text{C}$  NMR experimental chemical shifts with those calculated by GIAO approach for the DFT-optimized structures of **2a**.

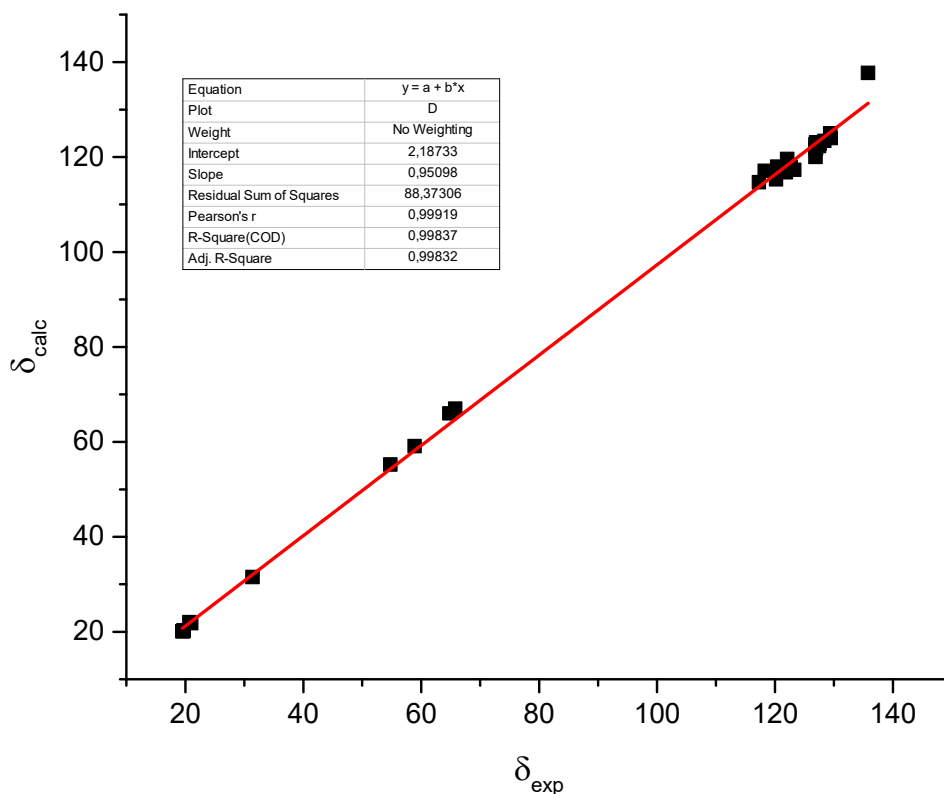

**Figure S109.** Correlations of the  $^{13}\text{C}$  NMR experimental chemical shifts with those calculated by GIAO approach for the DFT-optimized structures of **2b**.

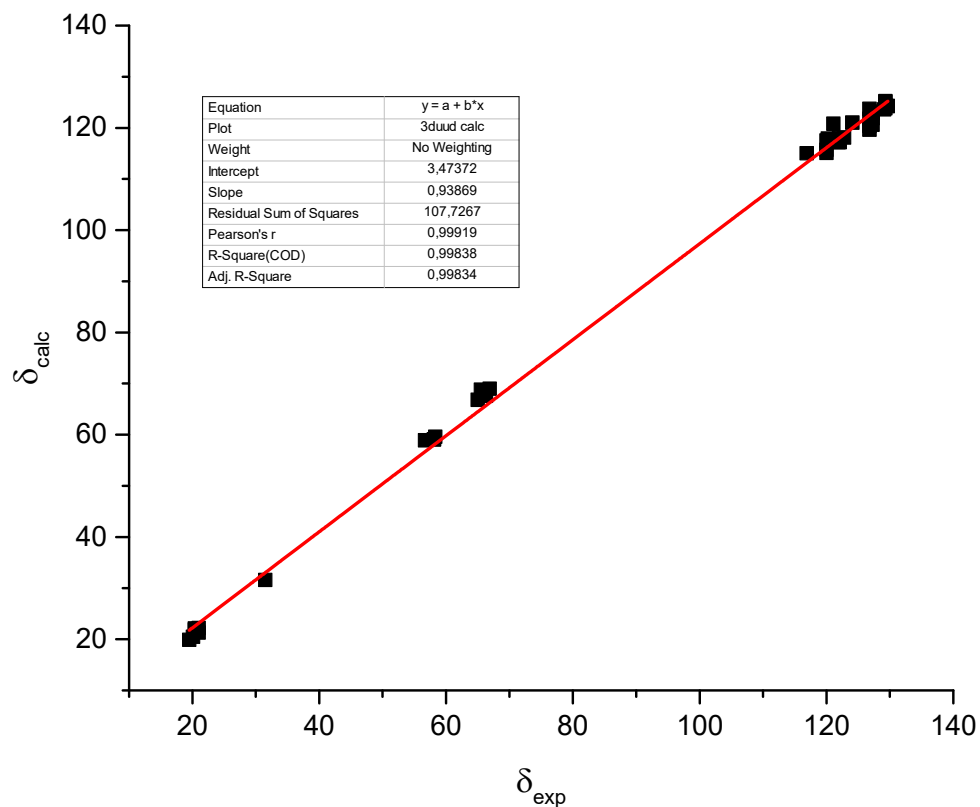

**Figure S110.** Correlations of the  $^{13}\text{C}$  NMR experimental chemical shifts with those calculated by GIAO approach for the DFT-optimized structures of **3-duud**.

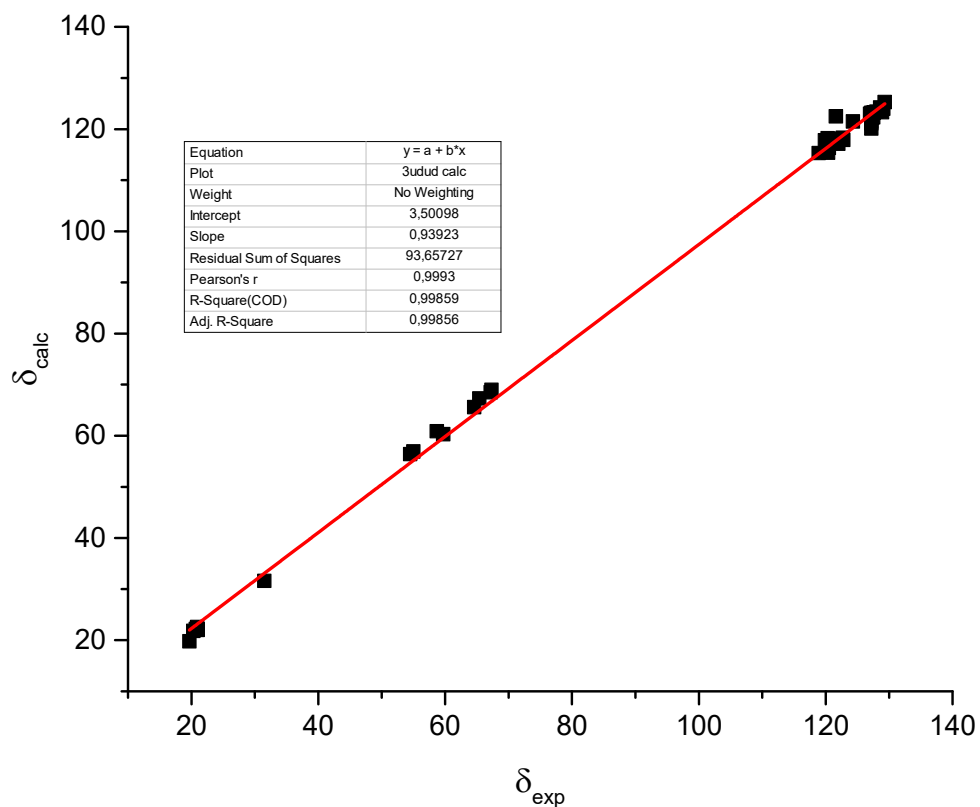

**Figure S111.** Correlations of the  $^{13}\text{C}$  NMR experimental chemical shifts with those calculated by GIAO approach for the DFT-optimized structures of **3-udud**.

++

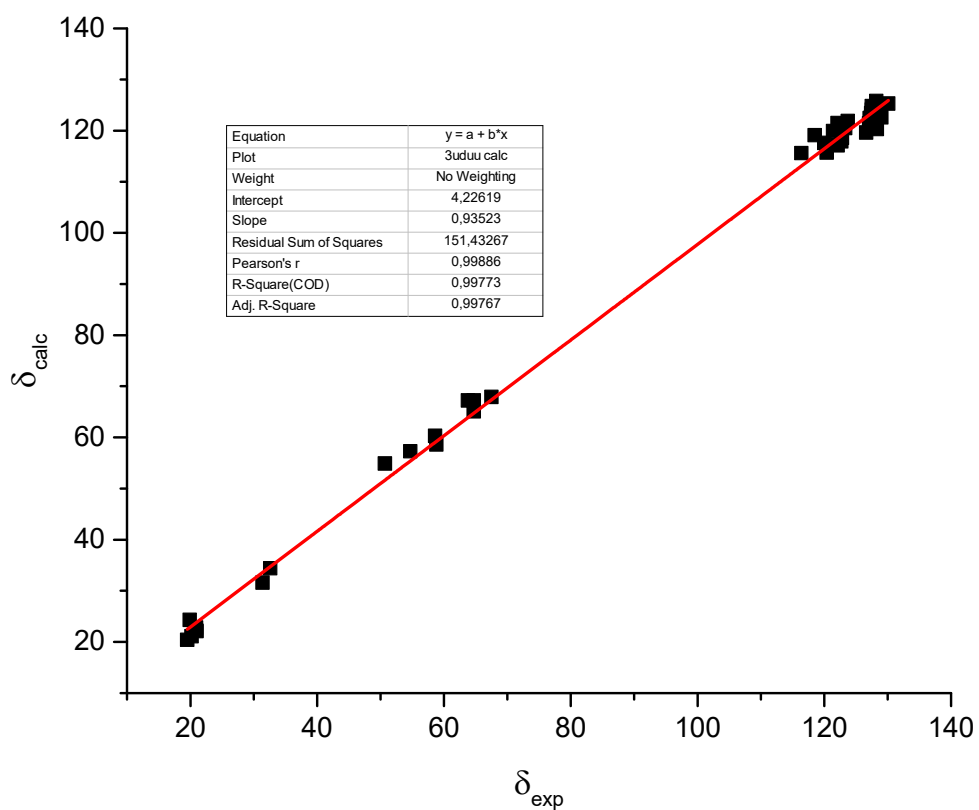

**Figure S112.** Correlations of the  $^{13}\text{C}$  NMR experimental chemical shifts with those calculated by GIAO approach for the DFT-optimized structures of **3-uduu**.

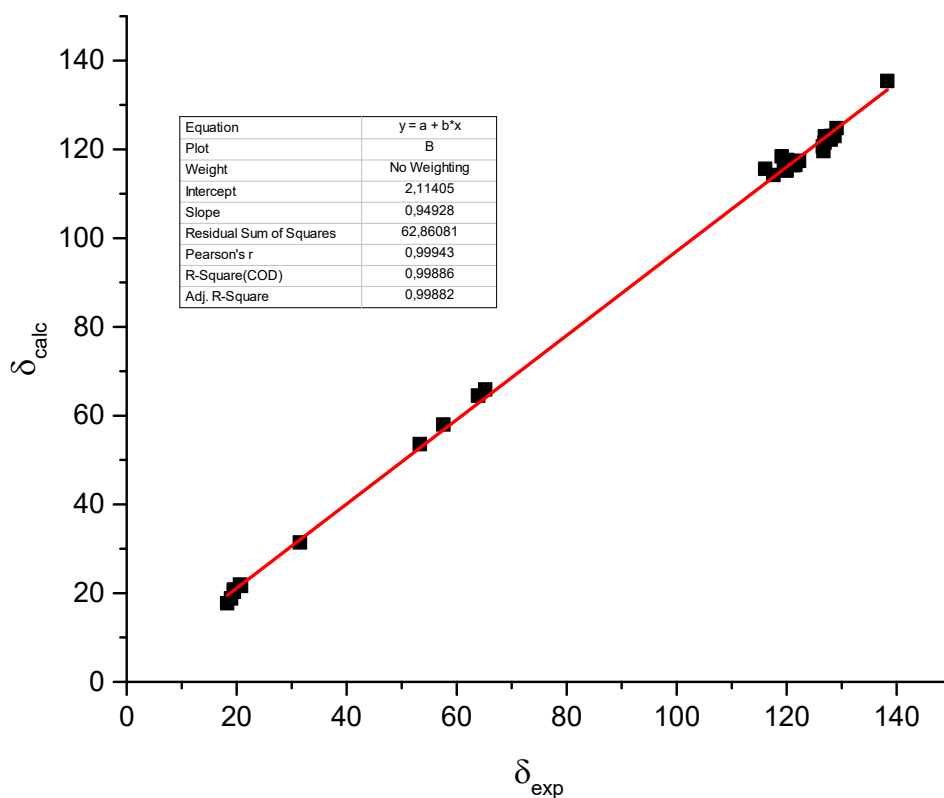

**Figure S113.** Correlations of the  $^{13}\text{C}$  NMR experimental chemical shifts with those calculated by GIAO approach for the DFT-optimized structures of **4**.

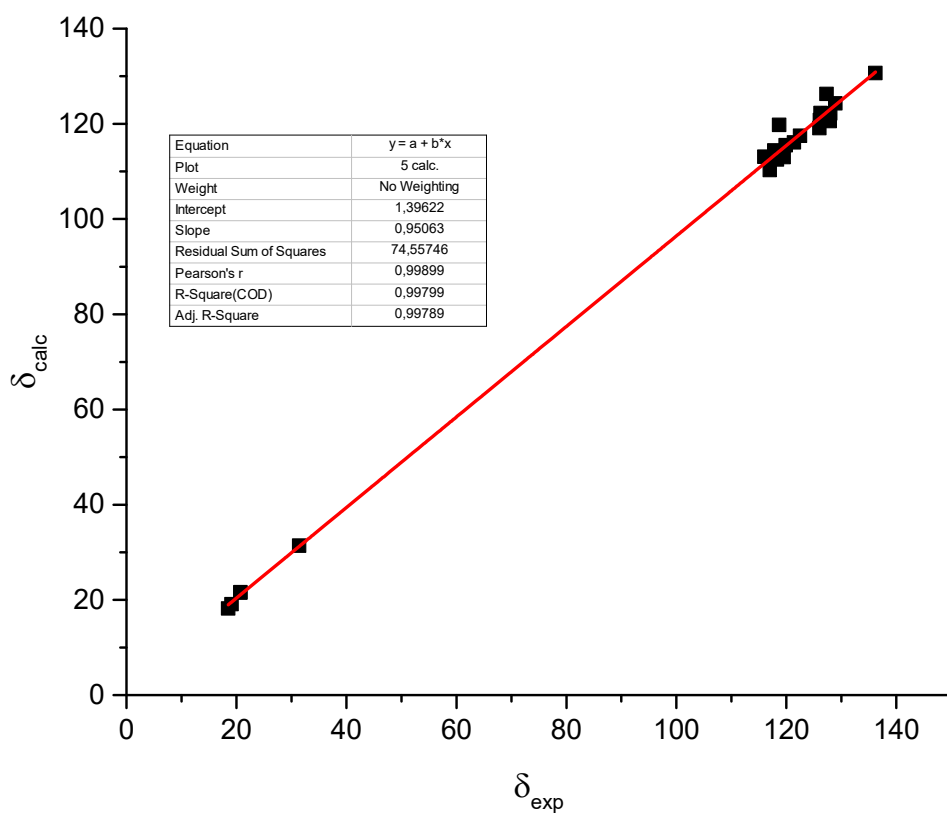

**Figure S114.** Correlations of the  $^{13}\text{C}$  NMR experimental chemical shifts with those calculated by GIAO approach for the DFT-optimized structures of **6**.

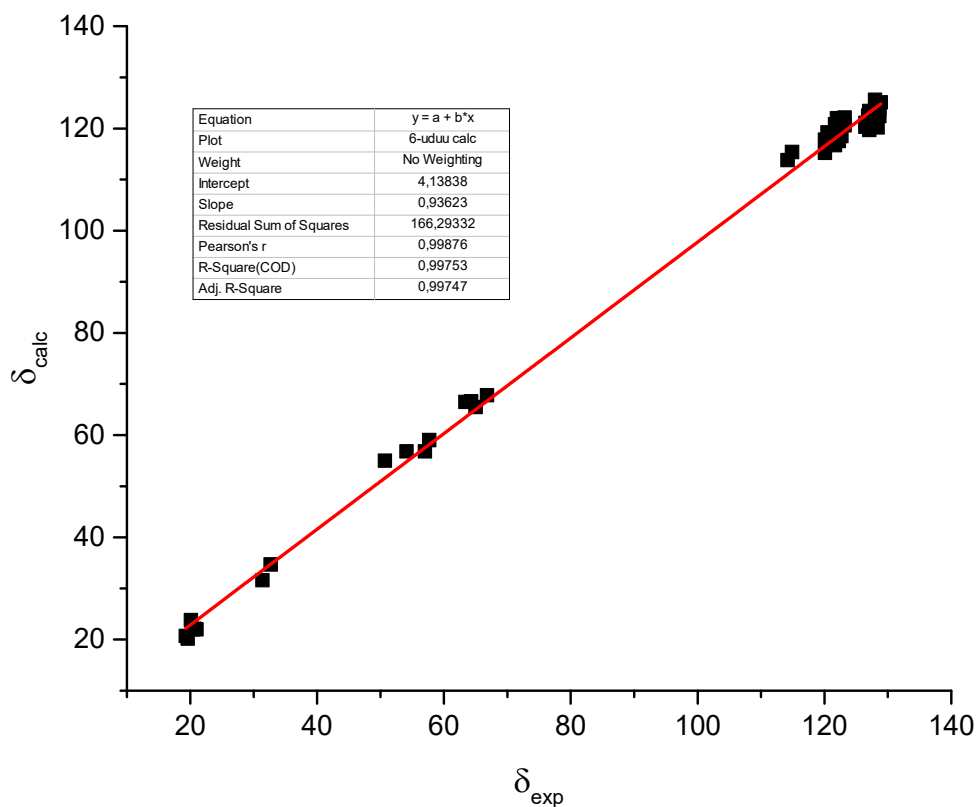

**Figure S115.** Correlations of the  $^{13}\text{C}$  NMR experimental chemical shifts with those calculated by GIAO approach for the DFT-optimized structures of **5-uduu**.

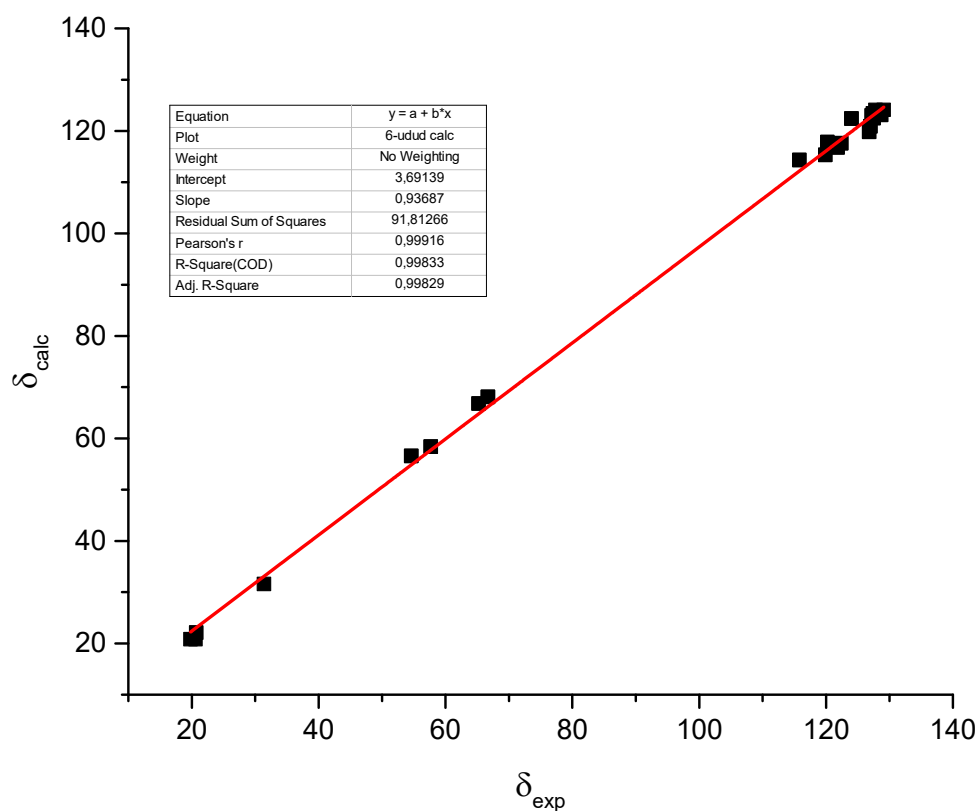

**Figure S116.** Correlations of the  $^{13}\text{C}$  NMR experimental chemical shifts with those calculated by GIAO approach for the DFT-optimized structures of **5-udud**.

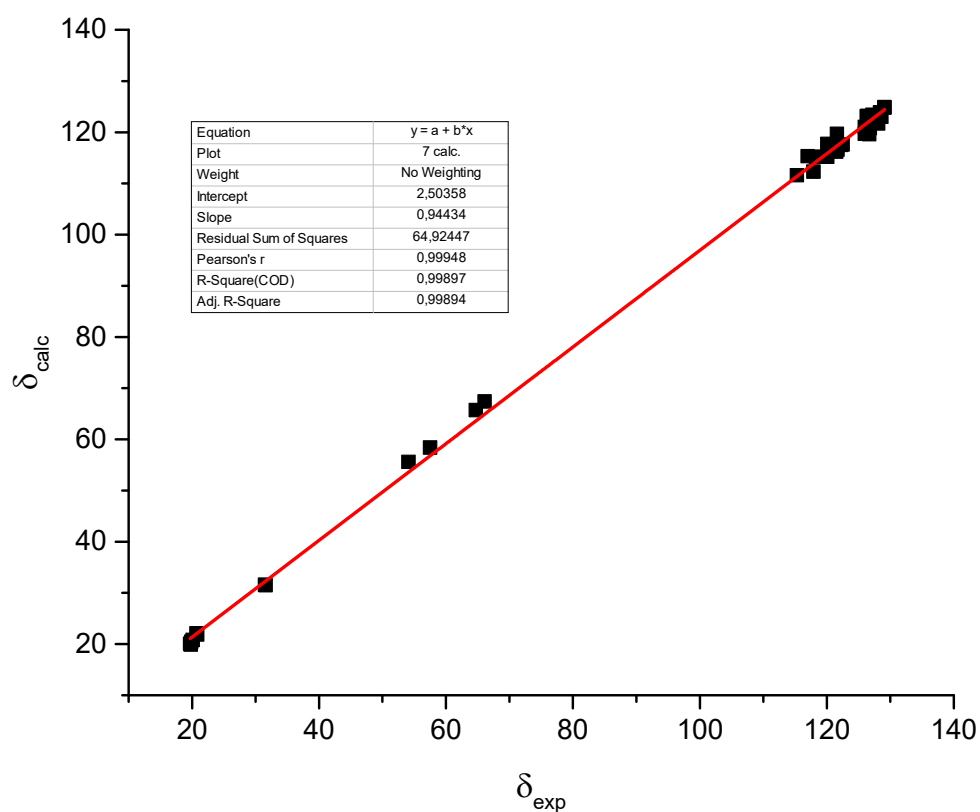

**Figure S117.** Correlations of the  $^{13}\text{C}$  NMR experimental chemical shifts with those calculated by GIAO approach for the DFT-optimized structures of **7**.

**Table S1.** NICS( $z$ ) (in ppm,  $z = 1, 0, -1$ ) for the systems **3-8**.

| System | Ring | NICS(1) | NICS(0) | NICS(-1) |
|--------|------|---------|---------|----------|
| 4      | D    | 24.47   | 32.61   | 32.50    |
| 4      | B    | 26.05   | 35.57   | 34.71    |
| 4      | E    | 3.60    | 8.96    | 11.40    |
| 4      | G    | -10.65  | -9.55   | -5.84    |
| 4      | F    | -1.70   | 1.63    | 5.25     |
| 4      | G'   | 3.90    | 9.36    | 9.53     |
| 4      | H    | -5.39   | -5.34   | -3.80    |
| 4      | A    | 23.53   | 31.65   | 28.96    |
| 4      | C    | 24.89   | 33.91   | 30.43    |
| 4      | J    | -2.15   | 0.66    | -1.86    |
| 4      | K    | -1.77   | 0.85    | -1.75    |
| 4      | Aryl | -13.08  | -11.06  | -12.05   |
| 4      | I    | -11.29  | -9.86   | -12.09   |
| 4      | M    | -8.78   | -7.52   | -9.37    |
| 4      | L    | -10.83  | -9.10   | -10.84   |
| 4      | Aryl | -12.08  | -10.68  | -11.94   |
| <hr/>  |      |         |         |          |
| 6      | D    | 40.67   | 42.93   | 32.60    |

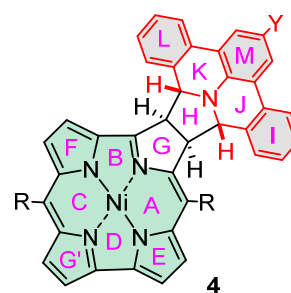



|   |      |        |        |        |
|---|------|--------|--------|--------|
| 6 | B    | 39.80  | 42.31  | 33.75  |
| 6 | E    | 13.35  | 9.52   | 3.13   |
| 6 | G'   | 8.25   | 7.94   | 3.55   |
| 6 | F    | 3.20   | 2.99   | 2.60   |
| 6 | G    | 2.97   | 0.89   | -1.30  |
| 6 | H    | -5.43  | -7.33  | -6.92  |
| 6 | A    | 37.79  | 41.89  | 32.42  |
| 6 | C    | 35.74  | 41.55  | 32.74  |
| 6 | K    | -3.61  | -1.33  | -3.99  |
| 6 | J    | -2.60  | -0.23  | -3.22  |
| 6 | Aryl | -12.42 | -11.04 | -12.30 |
| 6 | L    | -10.33 | -8.57  | -10.39 |
| 6 | M    | -10.15 | -8.71  | -10.35 |
| 6 | I    | -11.23 | -9.42  | -11.14 |
| 6 | Aryl | -11.94 | -10.89 | -12.42 |

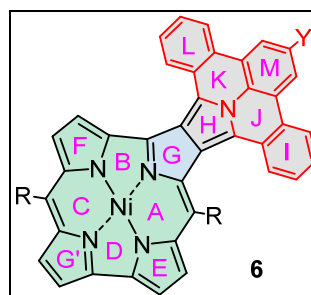

|       |      |        |        |        |
|-------|------|--------|--------|--------|
| 5udud | D    | 11.41  | 14.36  | 15.07  |
| 5udud | B    | 11.41  | 14.36  | 15.07  |
| 5udud | F    | -2.08  | 0.45   | 0.63   |
| 5udud | G    | -5.38  | -4.28  | -4.33  |
| 5udud | E    | -2.08  | 0.45   | 0.63   |
| 5udud | G'   | -5.38  | -4.28  | -4.33  |
| 5udud | H    | -3.60  | -4.76  | -3.08  |
| 5udud | H'   | -3.60  | -4.76  | -3.08  |
| 5udud | A    | 10.48  | 13.84  | 12.00  |
| 5udud | C    | 10.48  | 13.84  | 12.01  |
| 5udud | K    | -1.67  | 1.34   | -1.07  |
| 5udud | J    | -1.13  | 1.63   | -0.96  |
| 5udud | J'   | -1.13  | 1.63   | -0.96  |
| 5udud | K'   | -1.67  | 1.34   | -1.07  |
| 5udud | aryl | -12.24 | -10.10 | -11.14 |
| 5udud | L    | -10.97 | -9.44  | -11.57 |
| 5udud | M    | -8.51  | -7.25  | -9.12  |
| 5udud | I    | -10.45 | -8.61  | -10.27 |
| 5udud | aryl | -12.24 | -10.10 | -11.14 |
| 5udud | L'   | -10.97 | -9.44  | -11.57 |
| 5udud | M'   | -8.51  | -7.25  | -9.12  |
| 5udud | I'   | -10.45 | -8.61  | -10.27 |

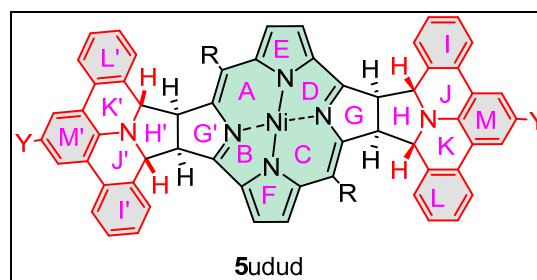

|      |    |       |       |       |
|------|----|-------|-------|-------|
| 5duu | D  | 11.96 | 14.98 | 15.13 |
| 5duu | B  | 12.48 | 15.48 | 15.68 |
| 5duu | E  | -2.24 | 0.13  | 0.54  |
| 5duu | H  | -6.31 | -5.69 | -5.80 |
| 5duu | F  | -2.23 | 0.32  | 0.82  |
| 5duu | H' | -5.70 | -4.73 | -4.82 |
| 5duu | G' | -3.65 | -4.86 | -3.15 |

|      |      |        |        |        |
|------|------|--------|--------|--------|
| 5duu | G    | -4.21  | -6.29  | -3.61  |
| 5duu | A    | 11.45  | 14.56  | 12.24  |
| 5duu | C    | 10.56  | 14.32  | 11.96  |
| 5duu | J'   | -1.20  | 1.53   | -1.08  |
| 5duu | K'   | -1.66  | 1.32   | -1.12  |
| 5duu | K    | -1.14  | 1.96   | -1.18  |
| 5duu | J    | -0.49  | 2.26   | -1.57  |
| 5duu | L    | -10.70 | -9.21  | -11.22 |
| 5duu | M    | -6.67  | -4.75  | -4.34  |
| 5duu | I    | -10.10 | -8.65  | -10.74 |
| 5duu | Aryl | -11.96 | -10.29 | -11.31 |
| 5duu | L'   | -10.95 | -9.45  | -11.57 |
| 5duu | M'   | -8.53  | -7.29  | -9.18  |
| 5duu | I'   | -10.48 | -8.68  | -10.38 |
| 5duu | Aryl | -12.26 | -10.19 | -11.22 |

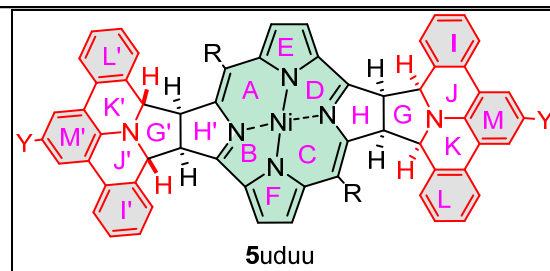

|   |      |        |        |        |
|---|------|--------|--------|--------|
| 7 | D    | 17.59  | 21.00  | 21.77  |
| 7 | B    | 17.88  | 24.06  | 23.74  |
| 7 | E    | 0.80   | 2.53   | 2.70   |
| 7 | G    | 1.73   | 4.30   | 3.36   |
| 7 | F    | -2.12  | 1.38   | 3.23   |
| 7 | G'   | -7.28  | -6.29  | -5.02  |
| 7 | H'   | -4.20  | -4.98  | -3.34  |
| 7 | H    | -8.11  | -9.08  | -7.19  |
| 7 | A    | 16.36  | 20.92  | 18.12  |
| 7 | C    | 17.54  | 22.58  | 19.98  |
| 7 | J'   | -1.34  | 1.37   | -1.24  |
| 7 | K'   | -1.89  | 1.10   | -1.33  |
| 7 | K    | -2.90  | 0.16   | -2.30  |
| 7 | J    | -3.45  | -0.97  | -3.54  |
| 7 | L    | -11.06 | -9.31  | -11.06 |
| 7 | M    | -10.41 | -8.89  | -10.36 |
| 7 | I    | -10.17 | -8.44  | -10.40 |
| 7 | Aryl | -11.58 | -9.90  | -11.02 |
| 7 | L'   | -11.10 | -9.61  | -11.73 |
| 7 | M'   | -8.59  | -7.33  | -9.18  |
| 7 | I'   | -10.57 | -8.77  | -10.46 |
| 7 | Aryl | -12.56 | -10.45 | -11.44 |

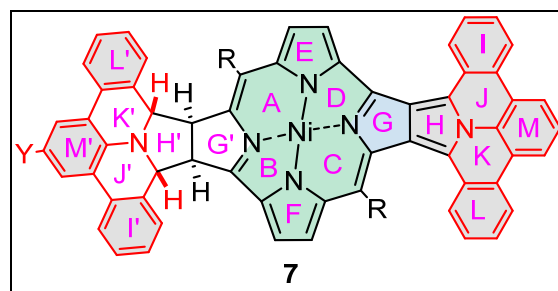

|   |    |       |       |       |
|---|----|-------|-------|-------|
| 8 | D  | 24.44 | 27.82 | 24.80 |
| 8 | B  | 24.81 | 27.83 | 24.43 |
| 8 | E  | -1.01 | 2.73  | 4.45  |
| 8 | G  | 1.45  | 2.20  | 0.36  |
| 8 | F  | 4.45  | 2.73  | -1.01 |
| 8 | G' | 0.36  | 2.20  | 1.44  |
| 8 | H' | -7.88 | -8.98 | -7.37 |

|   |      |        |       |        |
|---|------|--------|-------|--------|
| 8 | H    | -7.37  | -8.98 | -7.88  |
| 8 | A    | 22.58  | 27.96 | 24.35  |
| 8 | C    | 24.36  | 27.96 | 22.58  |
| 8 | J'   | -3.58  | -1.16 | -3.71  |
| 8 | K'   | -2.96  | 0.09  | -2.38  |
| 8 | K    | -2.38  | 0.09  | -2.96  |
| 8 | J    | -3.71  | -1.16 | -3.58  |
| 8 | L    | -10.89 | -9.25 | -11.10 |
| 8 | M    | -10.36 | -8.85 | -10.33 |
| 8 | I    | -10.29 | -8.44 | -10.23 |
| 8 | Aryl | -11.03 | -9.83 | -11.34 |
| 8 | L'   | -11.10 | -9.25 | -10.89 |
| 8 | M'   | -10.33 | -8.85 | -10.36 |
| 8 | I'   | -10.23 | -8.44 | -10.29 |
| 8 | Aryl | -11.34 | -9.83 | -11.03 |

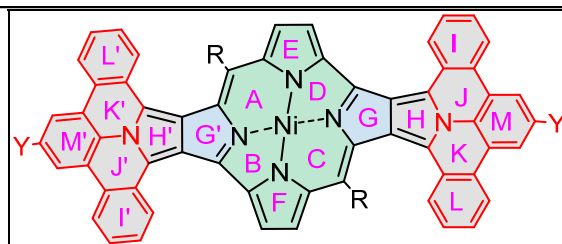

|       |      |        |        |        |
|-------|------|--------|--------|--------|
| 3duud | B    | 10.38  | 11.01  | 10.60  |
| 3duud | D    | 12.42  | 13.22  | 12.15  |
| 3duud | E    | -1.30  | -0.65  | -1.87  |
| 3duud | G    | -4.44  | -3.42  | -4.31  |
| 3duud | H    | -3.08  | -4.27  | -3.33  |
| 3duud | F    | -2.93  | -2.88  | -1.42  |
| 3duud | G'   | -4.49  | -3.38  | -4.47  |
| 3duud | H'   | -3.14  | -4.03  | -3.04  |
| 3duud | C    | 9.24   | 11.48  | 9.55   |
| 3duud | A    | 9.62   | 11.74  | 9.29   |
| 3duud | K    | -2.19  | 1.13   | -1.10  |
| 3duud | J    | -1.44  | 1.44   | -1.14  |
| 3duud | I    | -10.53 | -8.60  | -10.21 |
| 3duud | M    | -8.67  | -7.35  | -9.16  |
| 3duud | L    | -11.22 | -9.65  | -11.57 |
| 3duud | aryl | -12.30 | -10.22 | -11.12 |
| 3duud | K'   | -0.92  | 1.30   | -1.95  |
| 3duud | J'   | -1.21  | 1.42   | -1.39  |
| 3duud | I'   | -10.20 | -8.55  | -10.46 |
| 3duud | M'   | -9.17  | -7.33  | -8.61  |
| 3duud | L'   | -11.36 | -9.52  | -11.13 |
| 3duud | aryl | -10.88 | -9.92  | -11.99 |

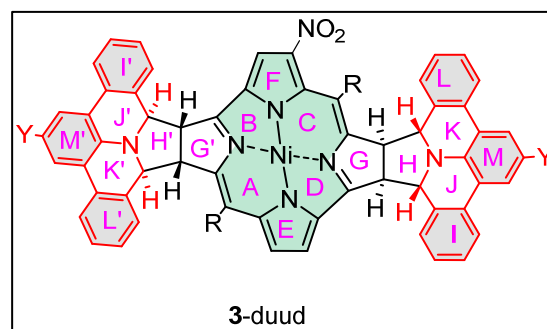

|       |    |       |       |       |
|-------|----|-------|-------|-------|
| 3udud | D  | 9.24  | 11.53 | 12.28 |
| 3udud | B  | 8.40  | 9.92  | 10.54 |
| 3udud | F  | -3.24 | -2.76 | -1.13 |
| 3udud | G  | -4.63 | -3.32 | -4.16 |
| 3udud | E  | -2.72 | -0.63 | -0.70 |
| 3udud | G' | -4.55 | -3.18 | -4.06 |
| 3udud | H  | -3.57 | -5.01 | -3.44 |

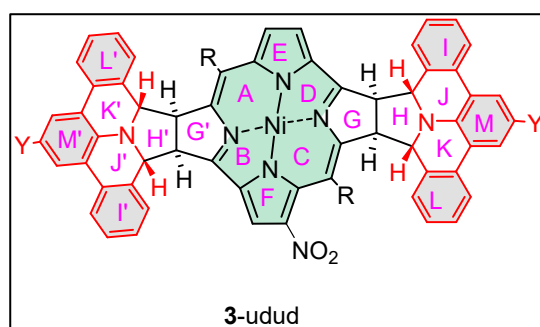

|       |      |        |        |        |
|-------|------|--------|--------|--------|
| 3udud | H'   | -3.26  | -4.53  | -2.97  |
| 3udud | A    | 8.19   | 10.78  | 9.07   |
| 3udud | C    | 8.12   | 10.54  | 9.09   |
| 3udud | K    | -2.11  | 0.90   | -1.80  |
| 3udud | J    | -1.07  | 1.81   | -0.70  |
| 3udud | J'   | -1.04  | 1.70   | -0.86  |
| 3udud | K'   | -1.58  | 1.43   | -0.97  |
| 3udud | aryl | -12.16 | -10.12 | -10.99 |
| 3udud | L    | -10.90 | -9.25  | -11.47 |
| 3udud | M    | -8.64  | -7.44  | -9.32  |
| 3udud | I    | -10.44 | -8.53  | -10.12 |
| 3udud | aryl | -12.10 | -9.94  | -10.96 |
| 3udud | L'   | -10.91 | -9.35  | -11.48 |
| 3udud | M'   | -8.51  | -7.24  | -9.12  |
| 3udud | I'   | -10.36 | -8.48  | -10.16 |
|       |      |        |        |        |
| 3uduu | B    | 7.99   | 9.83   | 10.26  |
| 3uduu | D    | 10.08  | 11.97  | 12.18  |
| 3uduu | F    | -4.26  | -3.55  | -1.45  |
| 3uduu | G'   | -5.49  | -4.38  | -5.15  |
| 3uduu | E    | -2.75  | -1.01  | -0.92  |
| 3uduu | G    | -4.60  | -3.44  | -4.30  |
| 3uduu | H    | -3.28  | -4.82  | -3.18  |
| 3uduu | H'   | -3.78  | -5.97  | -3.41  |
| 3uduu | C    | 8.73   | 10.80  | 8.85   |
| 3uduu | A    | 7.66   | 10.60  | 8.51   |
| 3uduu | J    | -1.18  | 1.64   | -0.89  |
| 3uduu | K    | -1.79  | 1.30   | -1.07  |
| 3uduu | K'   | -1.10  | 1.96   | -1.06  |
| 3uduu | J'   | -0.29  | 2.40   | -1.27  |
| 3uduu | L'   | -10.71 | -9.22  | -11.26 |
| 3uduu | M'   | -7.00  | -5.27  | -5.39  |
| 3uduu | I'   | -9.95  | -8.48  | -10.69 |
| 3uduu | aryl | -11.89 | -10.17 | -11.14 |
| 3uduu | L    | -10.98 | -9.46  | -11.55 |
| 3uduu | M    | -8.56  | -7.30  | -9.16  |
| 3uduu | I    | -10.47 | -8.60  | -10.25 |
| 3uduu | aryl | -12.18 | -10.18 | -11.16 |

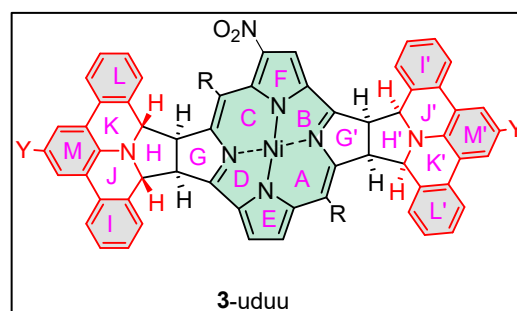

Table S1A. Selected NICS(1) indices (in ppm) calculated for the systems **3-8**

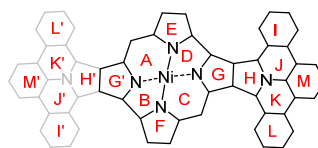

| NICS(1) |        |        |        |        |        |        |        |        |        |
|---------|--------|--------|--------|--------|--------|--------|--------|--------|--------|
| Ring    | 4      | 6      | 3-duud | 3-udud | 3-uduu | 5-udud | 5-uduu | 7      | 8      |
| A       | 23.53  | 37.79  | 9.62   | 8.19   | 7.66   | 10.48  | 11.45  | 16.36  | 22.58  |
| B       | 26.05  | 39.80  | 10.38  | 8.40   | 7.99   | 11.41  | 12.48  | 17.88  | 24.81  |
| C       | 24.89  | 35.74  | 9.24   | 8.12   | 8.73   | 10.48  | 10.56  | 17.54  | 24.36  |
| D       | 24.47  | 40.67  | 12.42  | 9.24   | 10.08  | 11.41  | 11.96  | 17.59  | 24.44  |
| E       | 3.60   | 13.35  | -1.30  | -2.72  | -2.75  | -2.08  | -2.24  | 0.80   | -1.01  |
| F       | -1.70  | 3.20   | -2.93  | -3.24  | -4.26  | -2.08  | -2.23  | -2.12  | 4.45   |
| G       | -10.65 | 2.97   | -4.44  | -4.63  | -4.60  | -5.38  | -4.21  | 1.73   | 1.45   |
| H       | -5.39  | -5.43  | -3.08  | -3.57  | -3.28  | -3.60  | -6.31  | -8.11  | -7.37  |
| I       | -11.29 | -11.23 | -10.53 | -10.44 | -10.47 | -10.45 | -10.10 | -10.17 | -10.29 |
| J       | -2.15  | -2.60  | -1.44  | -1.07  | -1.18  | -1.13  | -0.49  | -3.45  | -3.71  |
| K       | -1.77  | -3.61  | -2.19  | -2.11  | -1.79  | -1.67  | -1.14  | -2.90  | -2.38  |
| L       | -10.83 | -10.33 | -11.22 | -10.90 | -10.98 | -10.97 | -10.70 | -11.06 | -10.89 |
| M       | -8.78  | -10.15 | -8.67  | -8.64  | -8.56  | -8.51  | -6.67  | -10.41 | -10.36 |
| G'      | 3.90   | 8.25   | -4.49  | -4.55  | -5.49  | -5.38  | -3.65  | -7.28  | 0.36   |
| H'      |        |        | -3.14  | -3.26  | -3.78  | -3.60  | -5.70  | -4.20  | -7.88  |
| I'      |        |        | -10.20 | -10.36 | -9.95  | -10.45 | -10.48 | -10.57 | -10.23 |
| J'      |        |        | -1.21  | -1.04  | -0.29  | -1.13  | -1.20  | -1.34  | -3.58  |
| K'      |        |        | -0.92  | -1.58  | -1.10  | -1.67  | -1.66  | -1.89  | -2.96  |
| L'      |        |        | -11.36 | -10.91 | -10.71 | -10.97 | -10.95 | -11.10 | -11.10 |
| M'      |        |        | -9.17  | -8.51  | -7.00  | -8.51  | -8.53  | -8.59  | -10.33 |

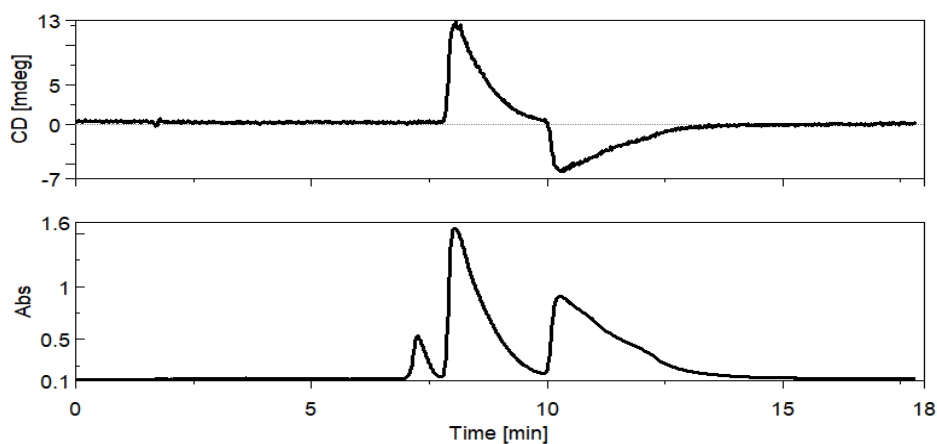

**Figure S118.** Chiral stationary phase HPLC profiles (bottom, absorbance detection; top ECD detection at 305 nm) for **2a** with DCM/hexane (60/40) mobile phase and 2 mL/min flow rate.

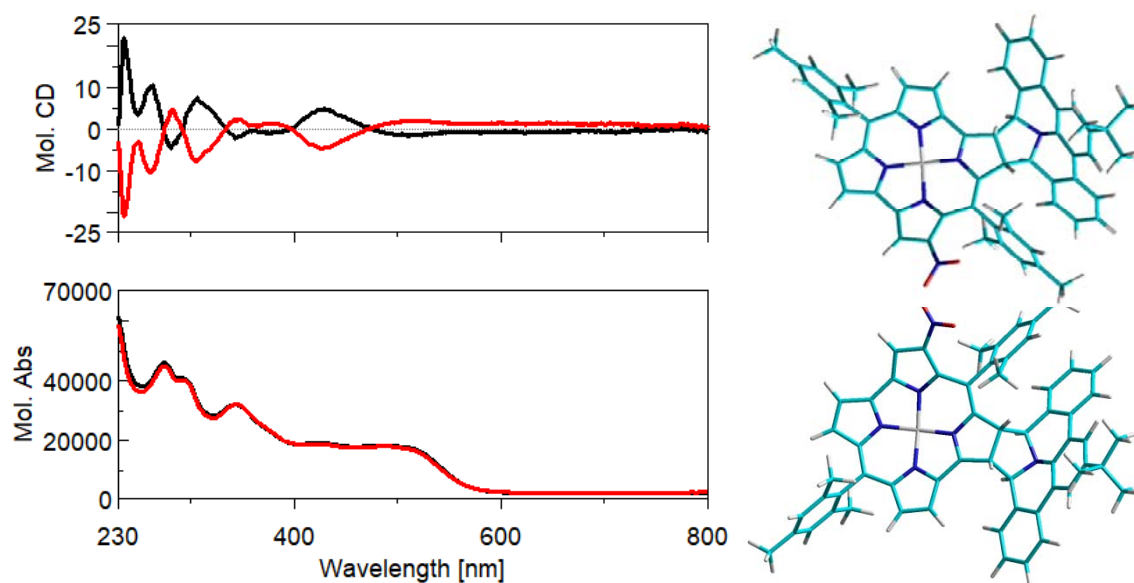

**Figure S119.** Absorbance (bottom) and ECD (top) spectra of *R,R,R,S-2a* (black traces) and *S,S,S,R-2a* (red traces) recorded in dichloromethane (298 K).

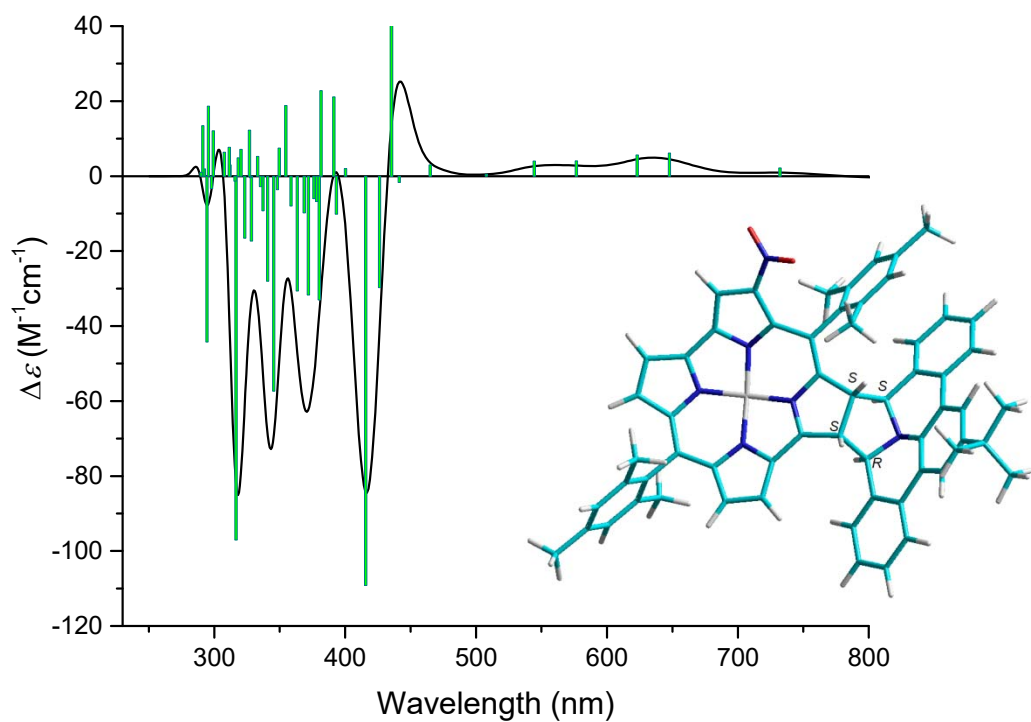

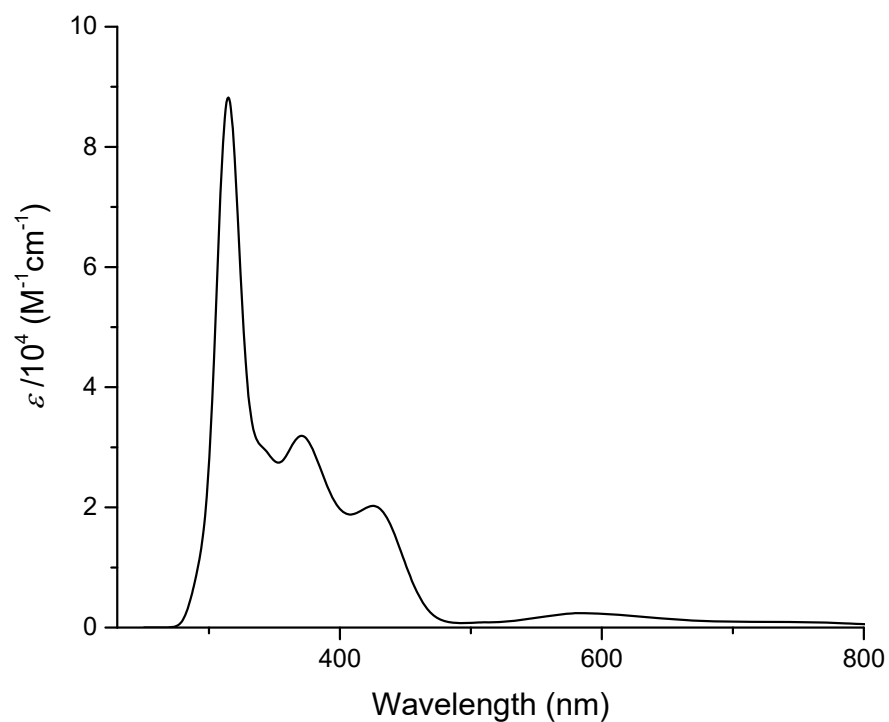

**Figure S120.** TD DFT calculated absorbance (bottom) and ECD (top) spectra of *S,S,S,R-2a*.

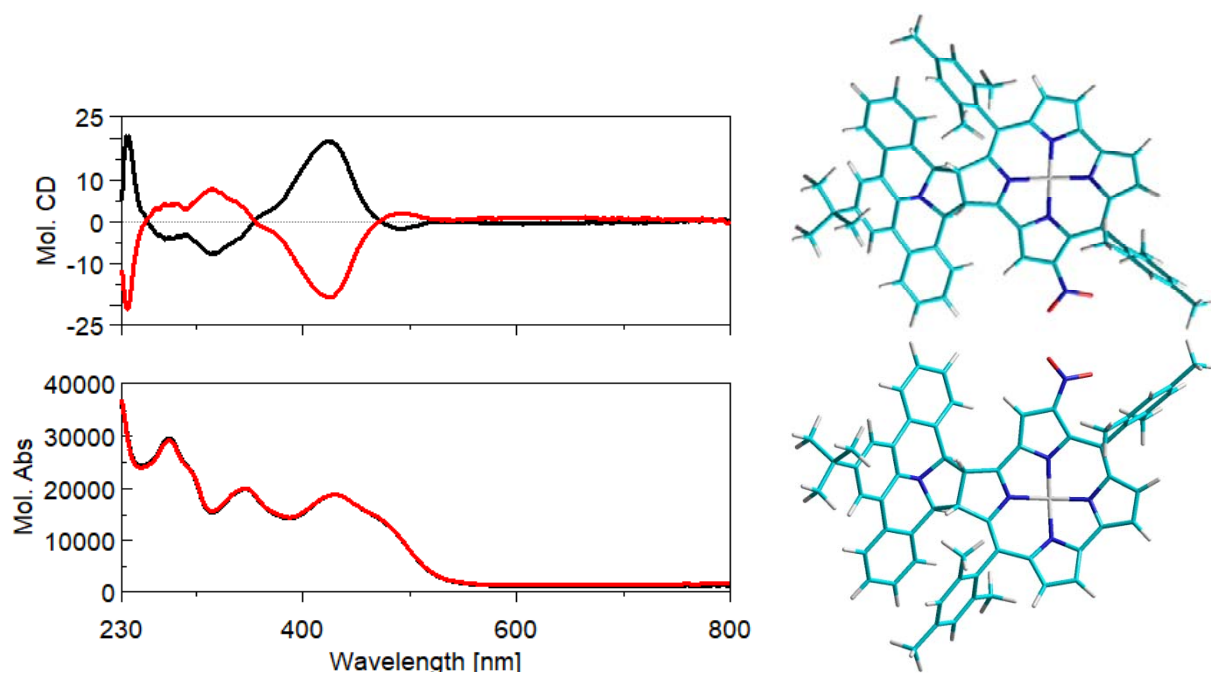

**Figure S121.** Absorbance (bottom) and ECD (top) spectra of *S,R,R,S-2b* (red traces) and *R,S,S,R-2b* (red traces) recorded in dichloromethane (298 K).

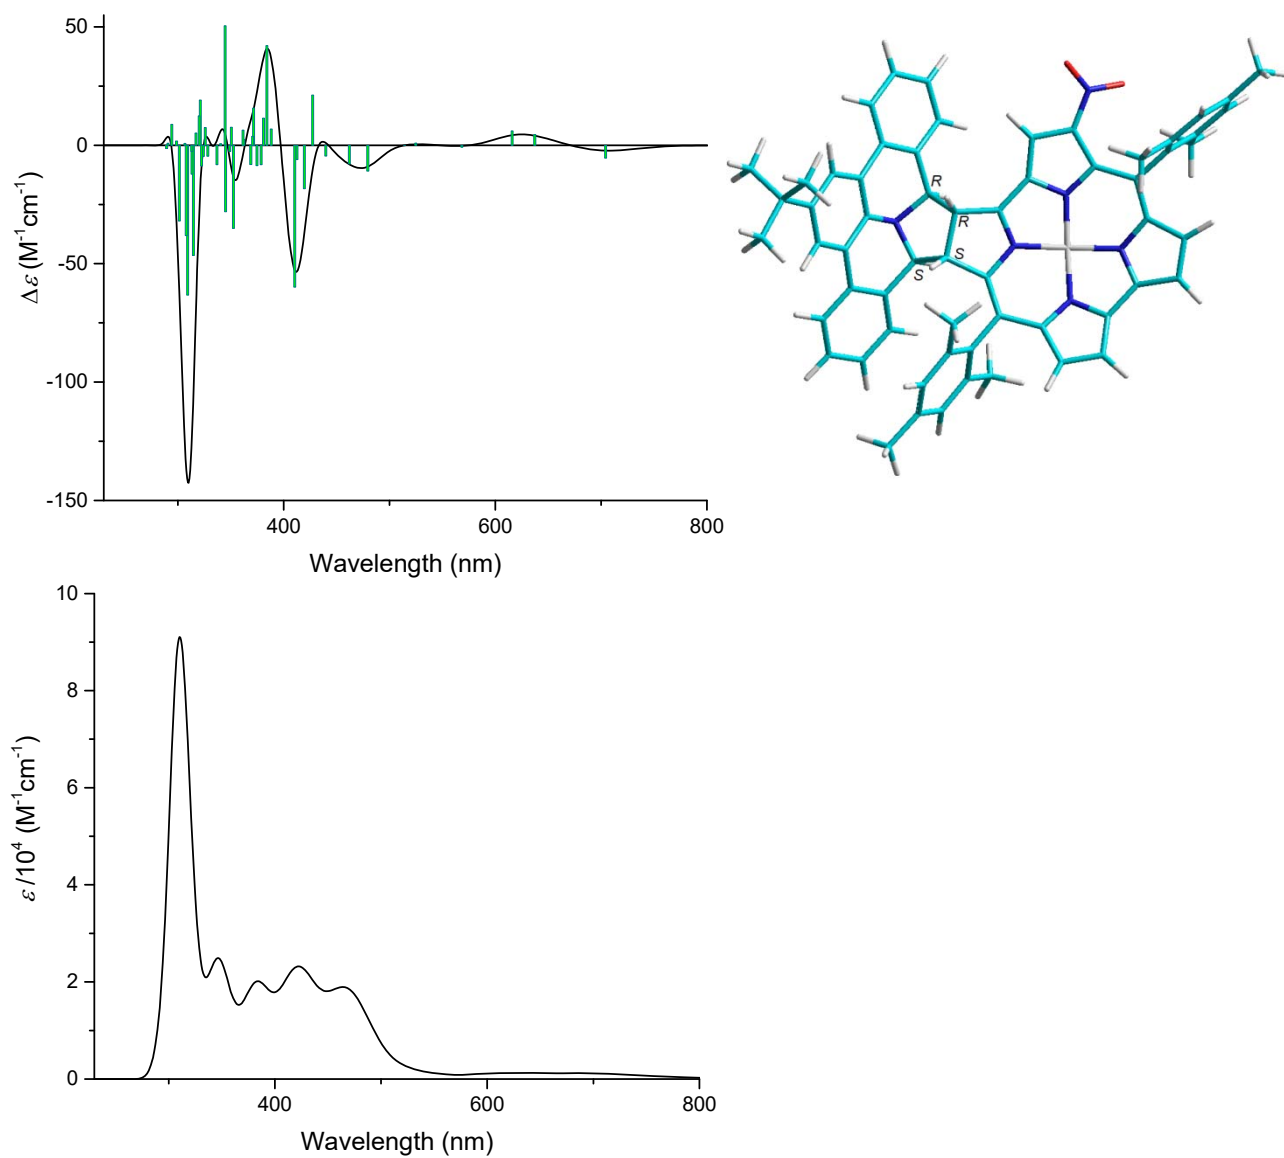

**Figure S12.** TD DFT calculated absorbance (bottom) and ECD (top) spectra of *R,S,S,R*-2b.



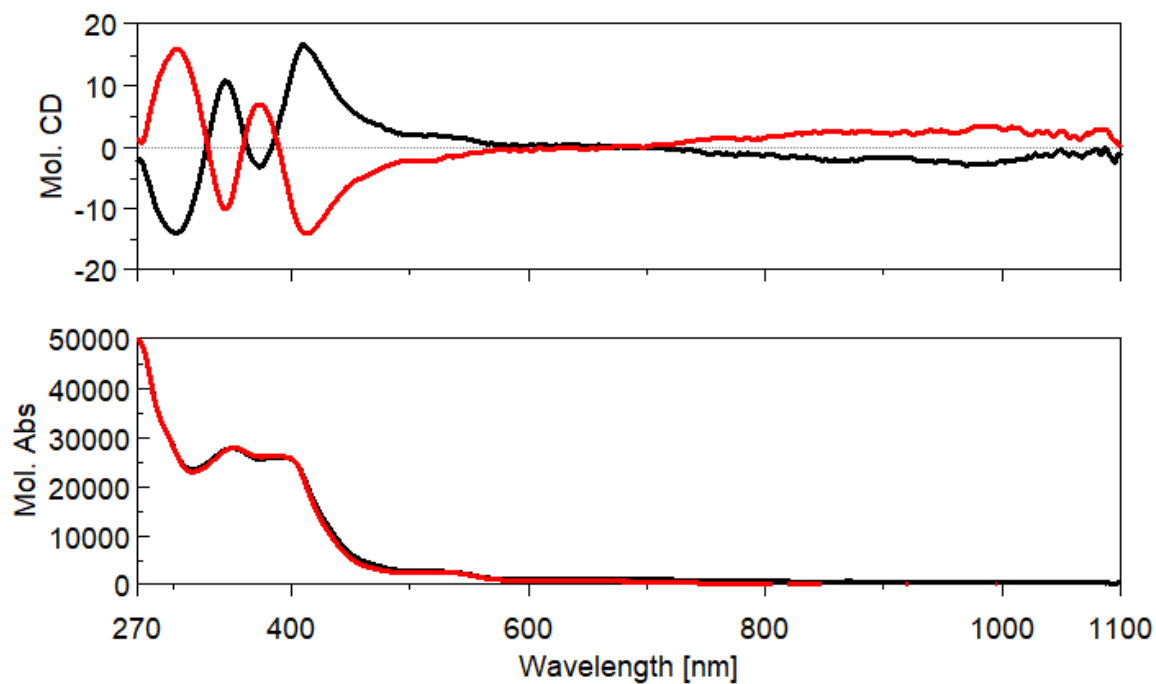

**Figure S123.** Absorbance (bottom) and ECD (top) spectra of *R,S,S,R,R,S,R,S*-5-uduu (black traces) and *S,R,R,S,S,R,S,R*-5-dudd (red traces) recorded in dichloromethane (298 K).

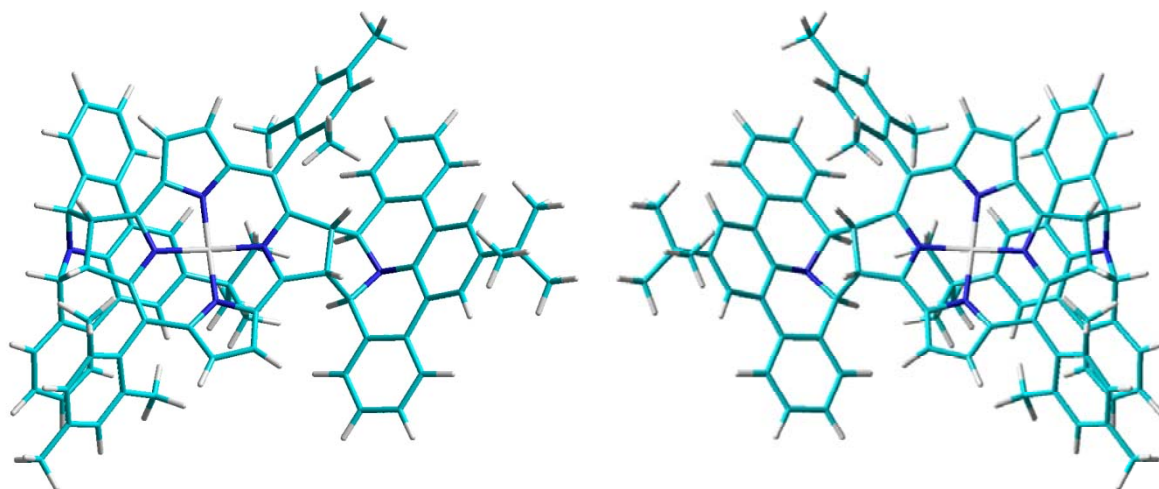

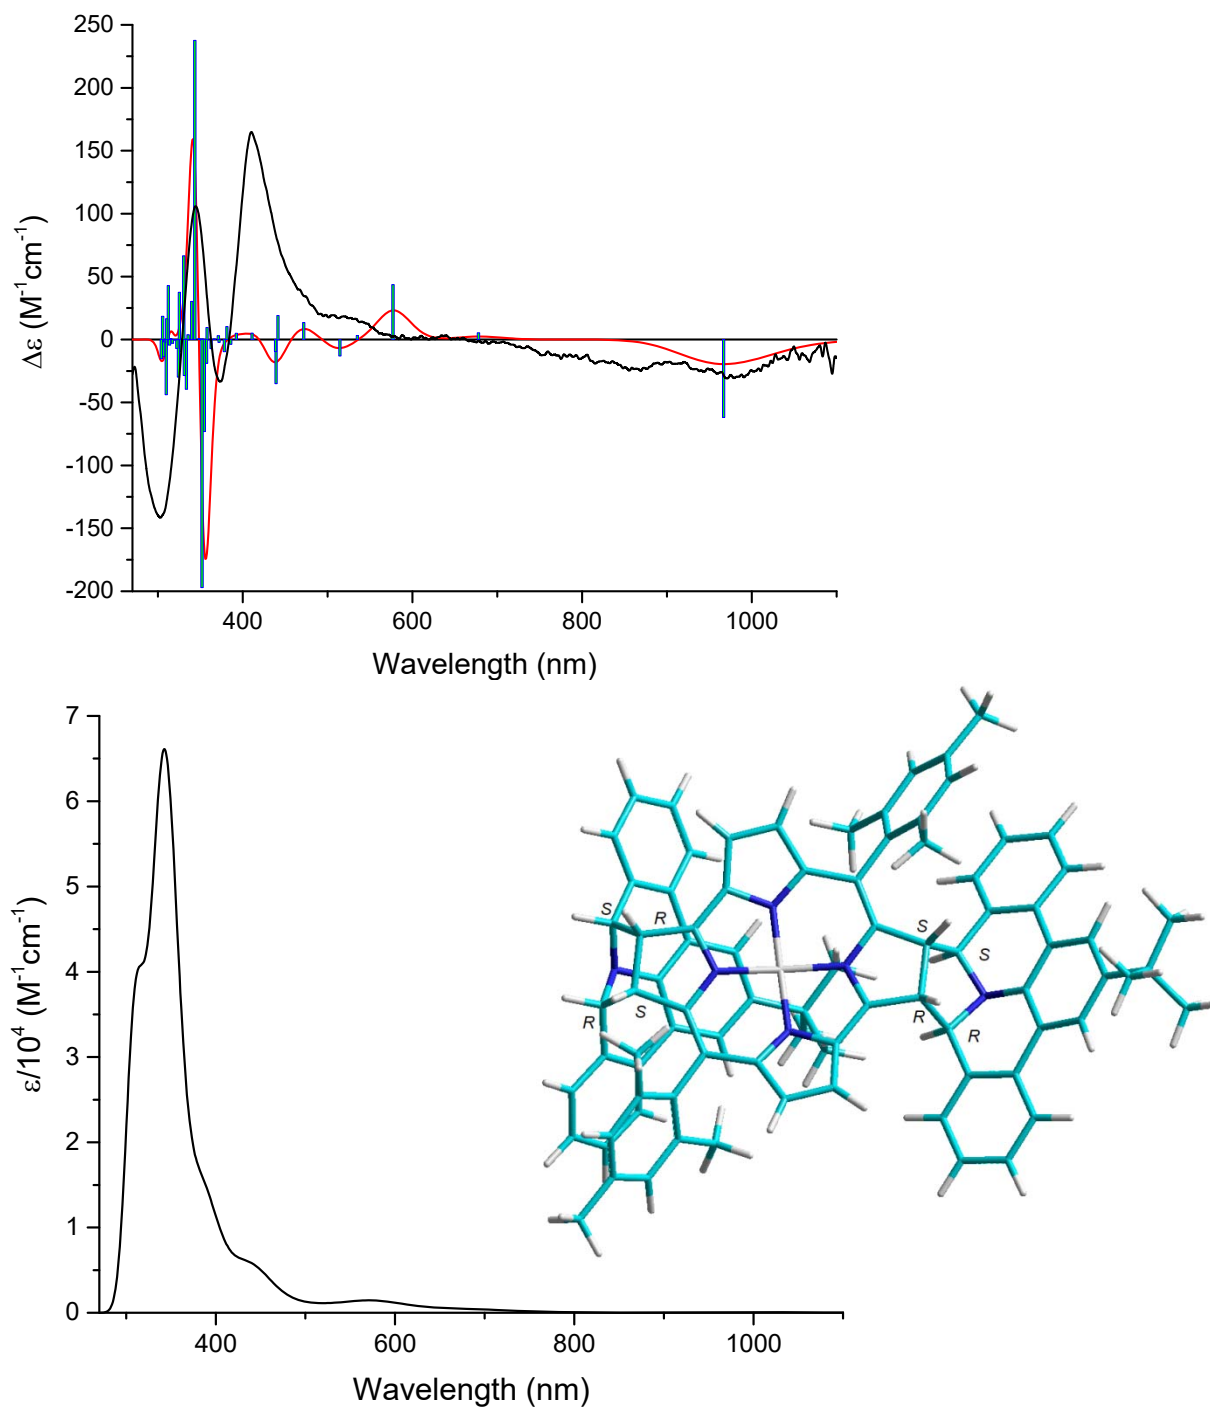

**Figure S124.** TD DFT calculated absorbance (bottom) and ECD (top) spectra of *R,S,S,R,R,S,R,S*-5-uduu with superimposed experimental ECD spectrum of the faster migrating enantiomer (red trace).

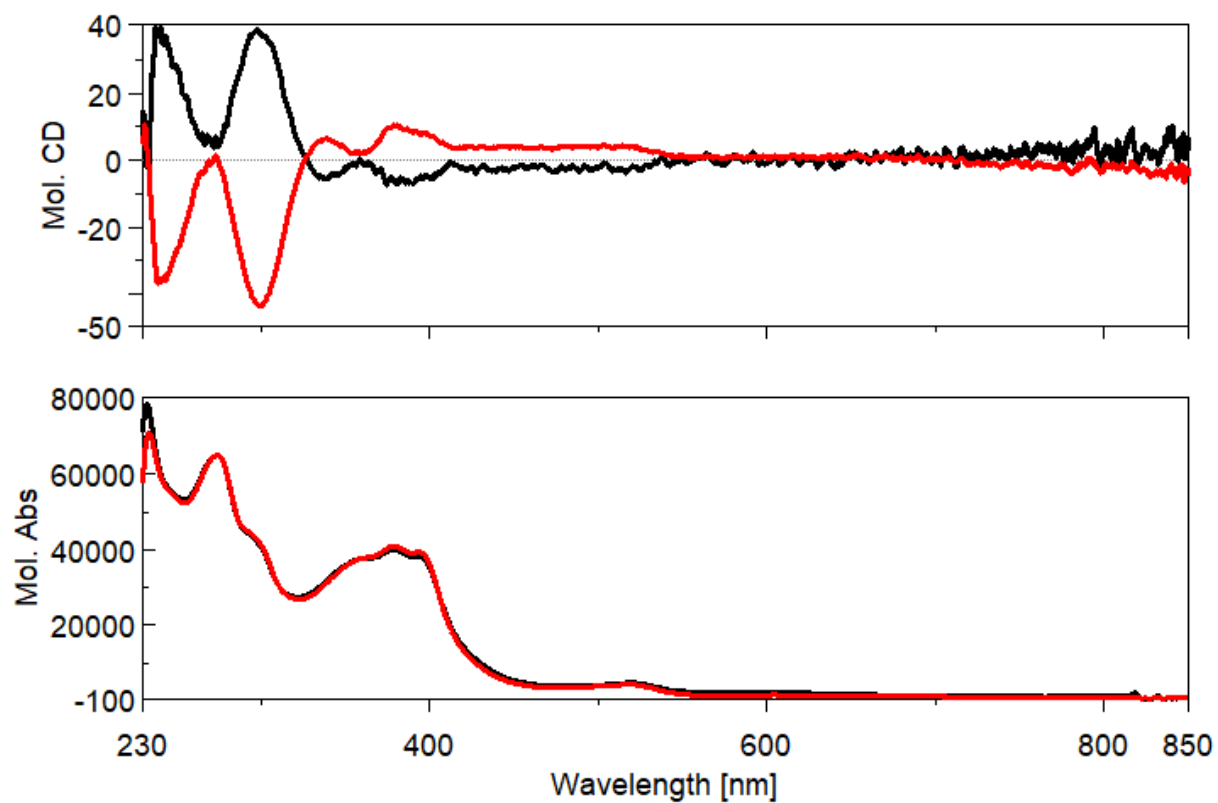

**Figure S125.** Absorbance (bottom) and ECD (top) spectra of *S,R,R,S,R,R,S-5 = 5-dudu* (black traces) and *R,S,S,R,R,S,S,R-5 = 5-udud* (red traces) recorded in dichloromethane (298 K).

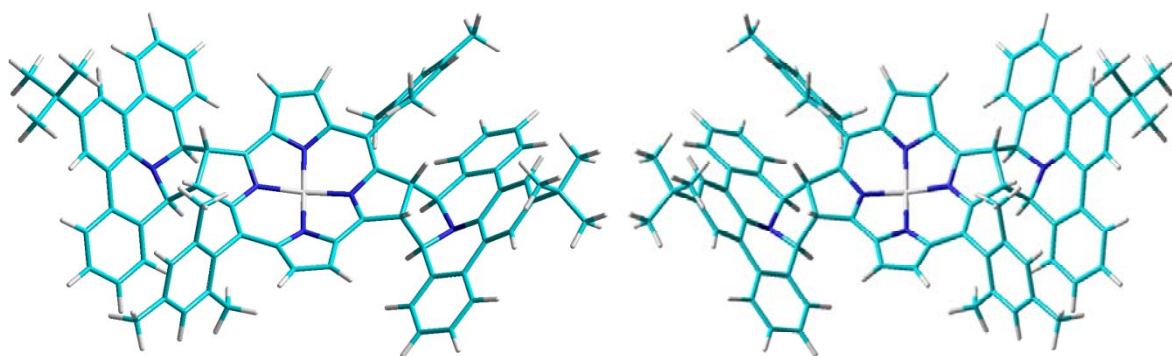

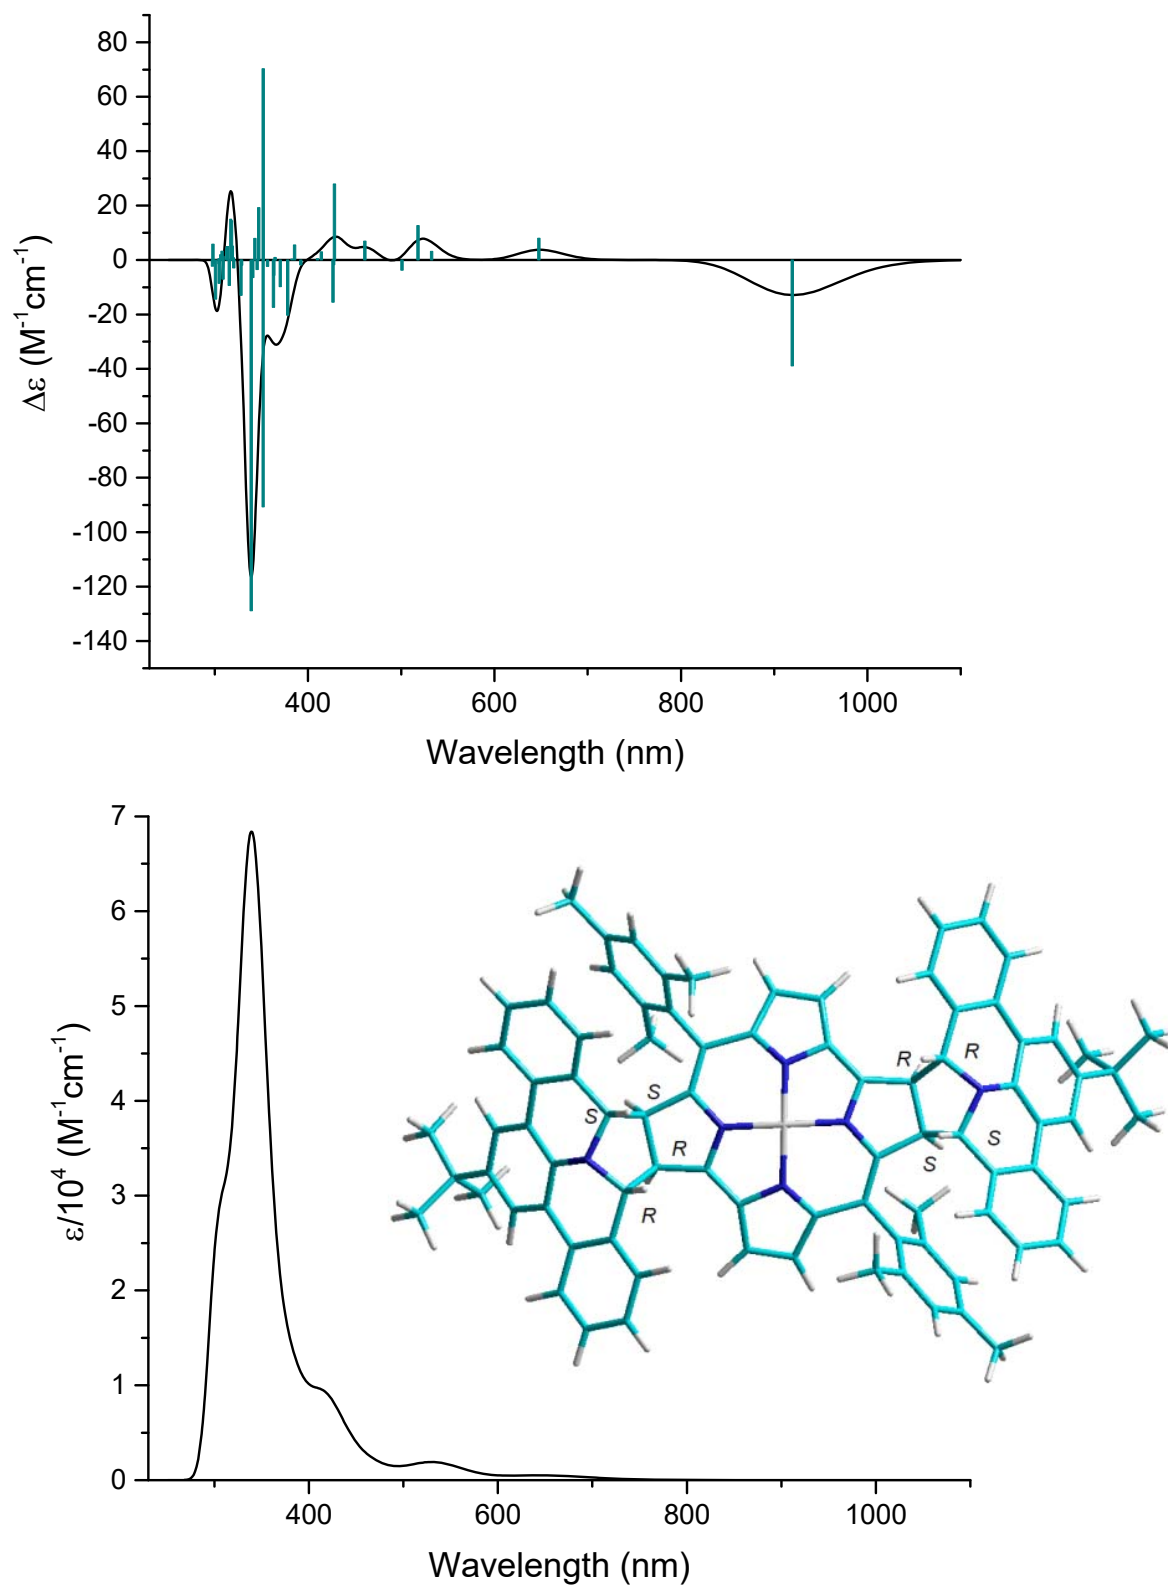

**Figure S126.** TD DFT calculated absorbance (bottom) and ECD (top) spectra of *R,S,S,R,R,S,R*-5-udud.

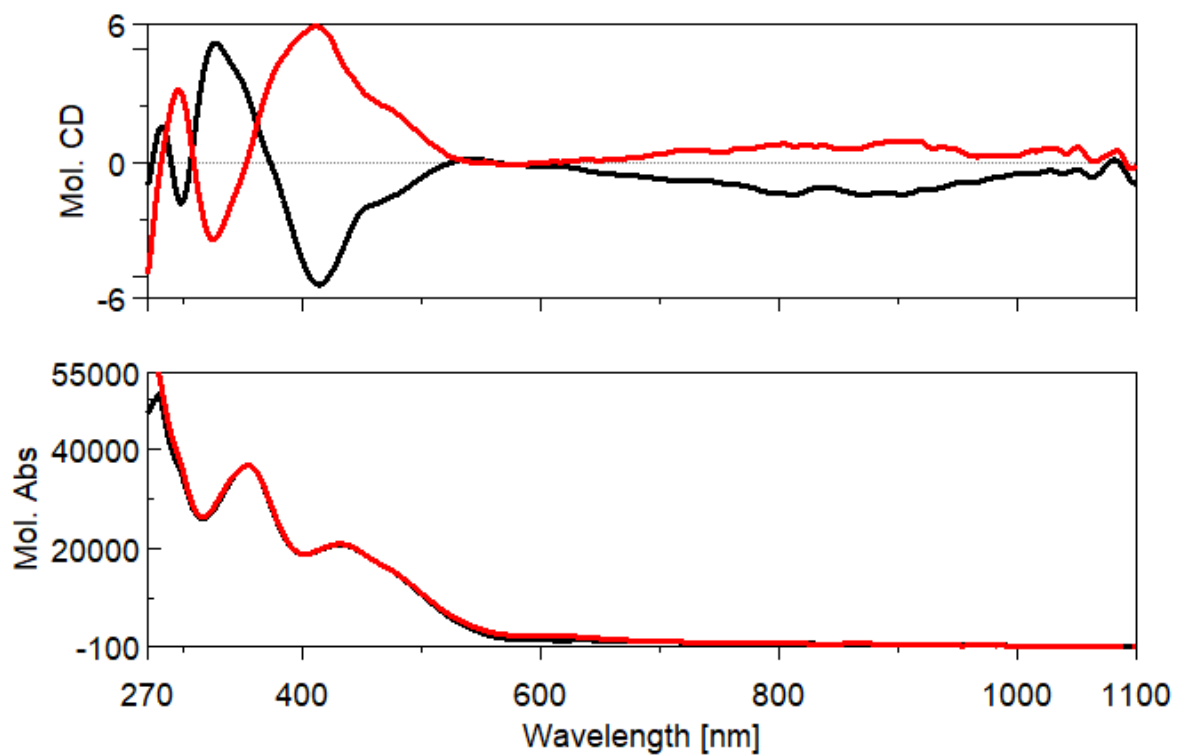

**Figure S127.** Absorbance (bottom) and ECD (top) spectra of *R,R,S,S,R,R,S*-3 = 3-uddu (black traces) and *S,S,R,R,R,S,S,R*-3 = 3-duud (red traces) recorded in dichloromethane (298 K).

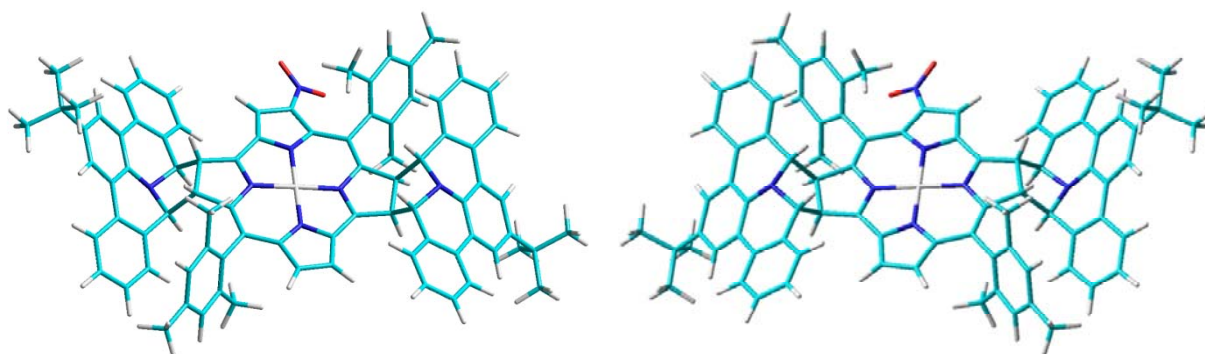

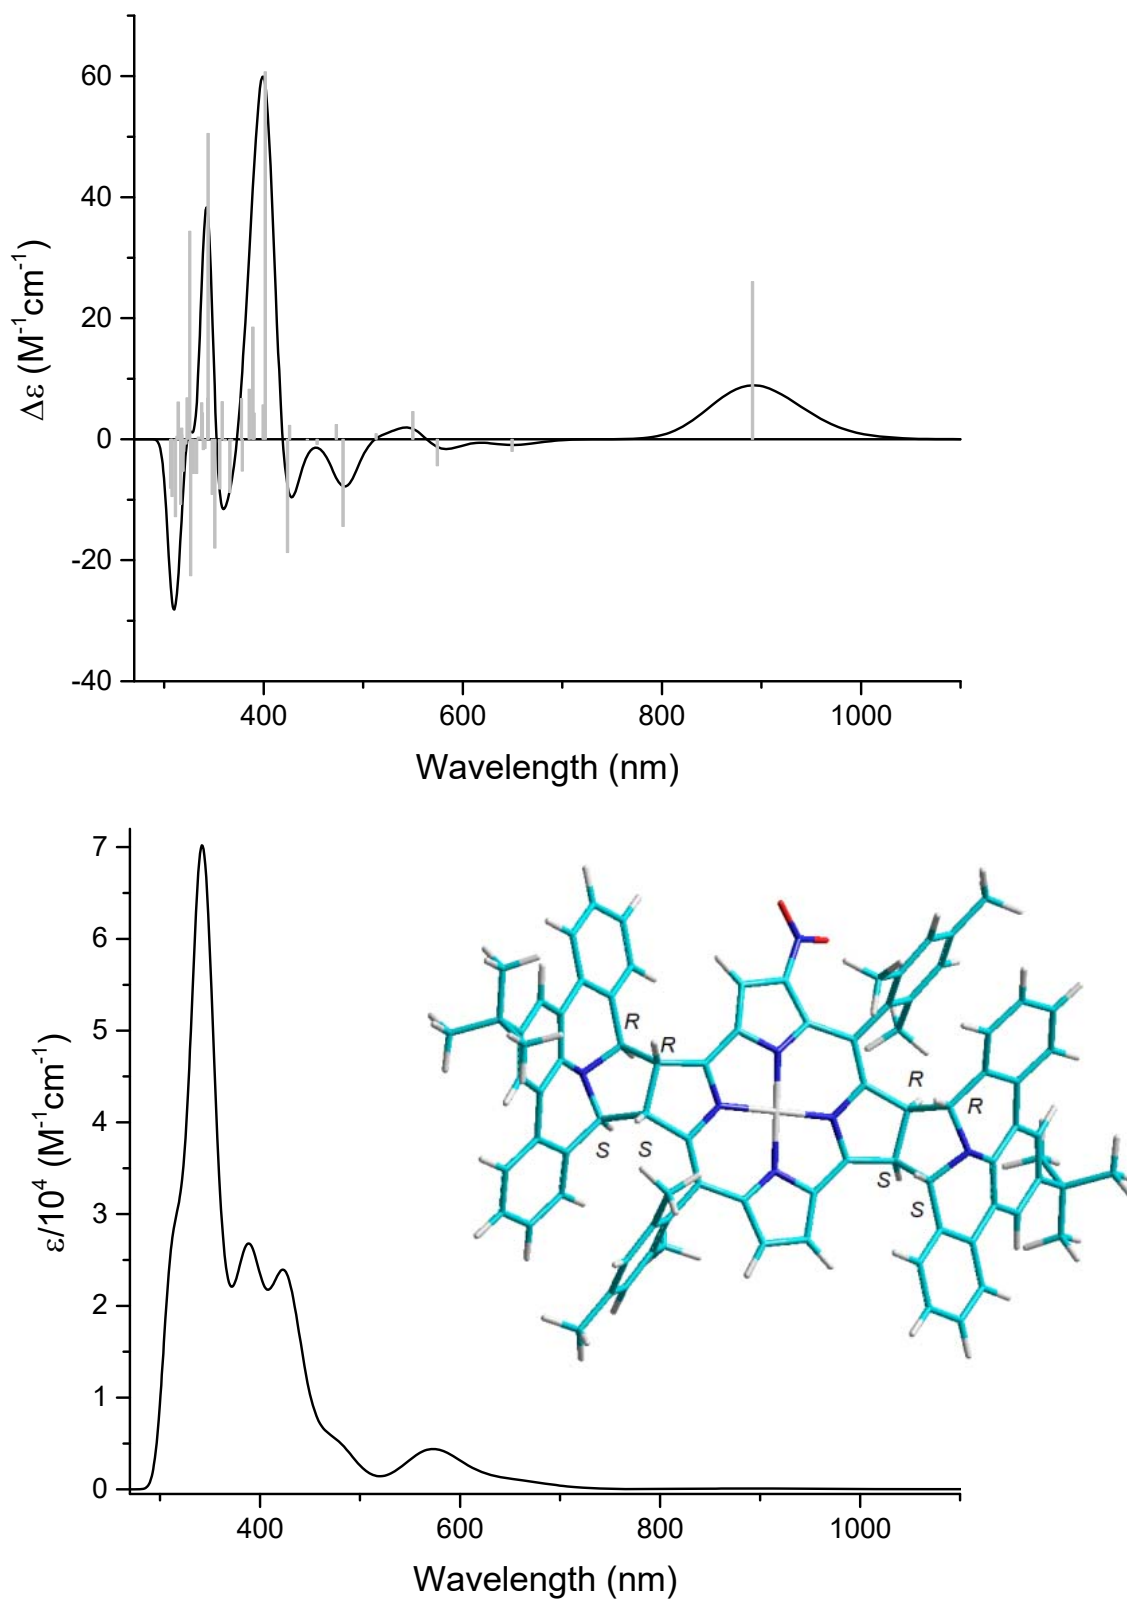

**Figure S128.** TD DFT calculated absorbance (bottom) and ECD (top) spectra of *S,S,R,R,S,R*-3-duud.

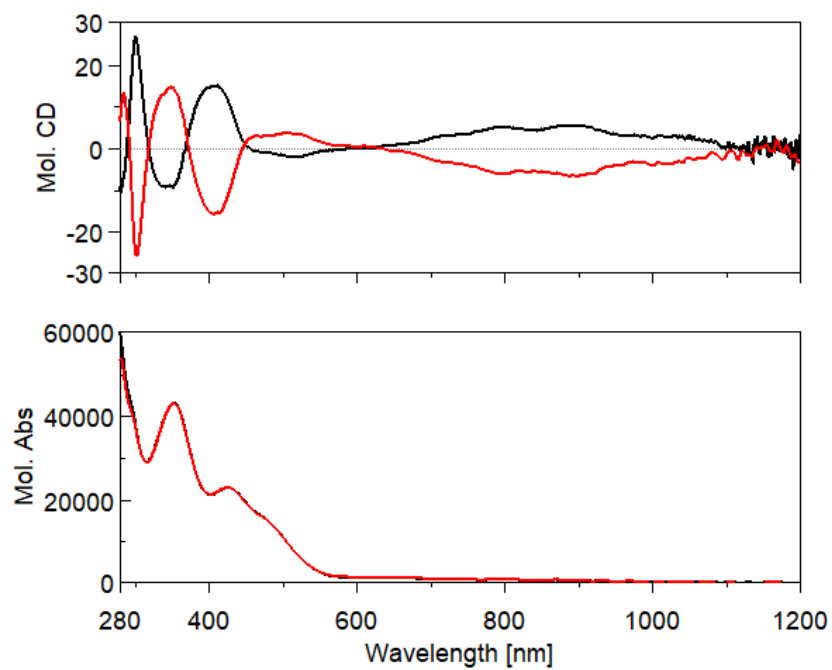

**Figure S129.** Absorbance (bottom) and ECD (top) spectra of *S,R,R,S,R,R,S*-**3**-dudu (black traces) and *R,S,S,R,R,S,S*-**3**-udud (red traces) recorded in dichloromethane (298 K).

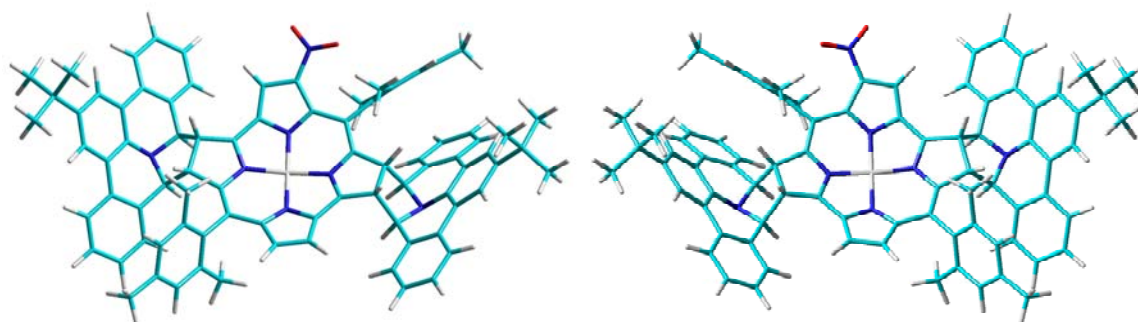

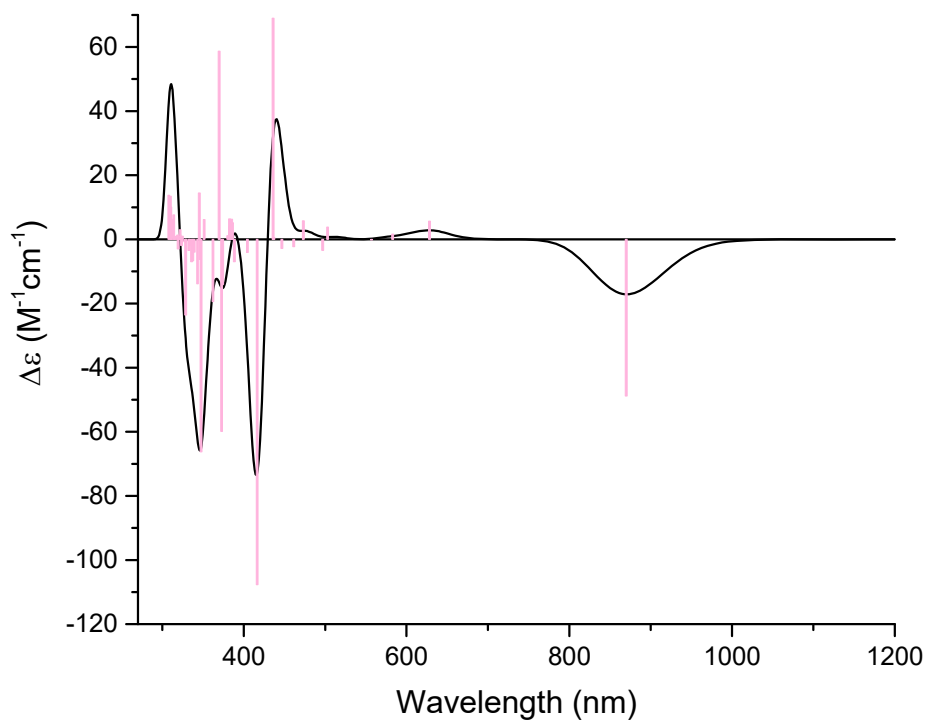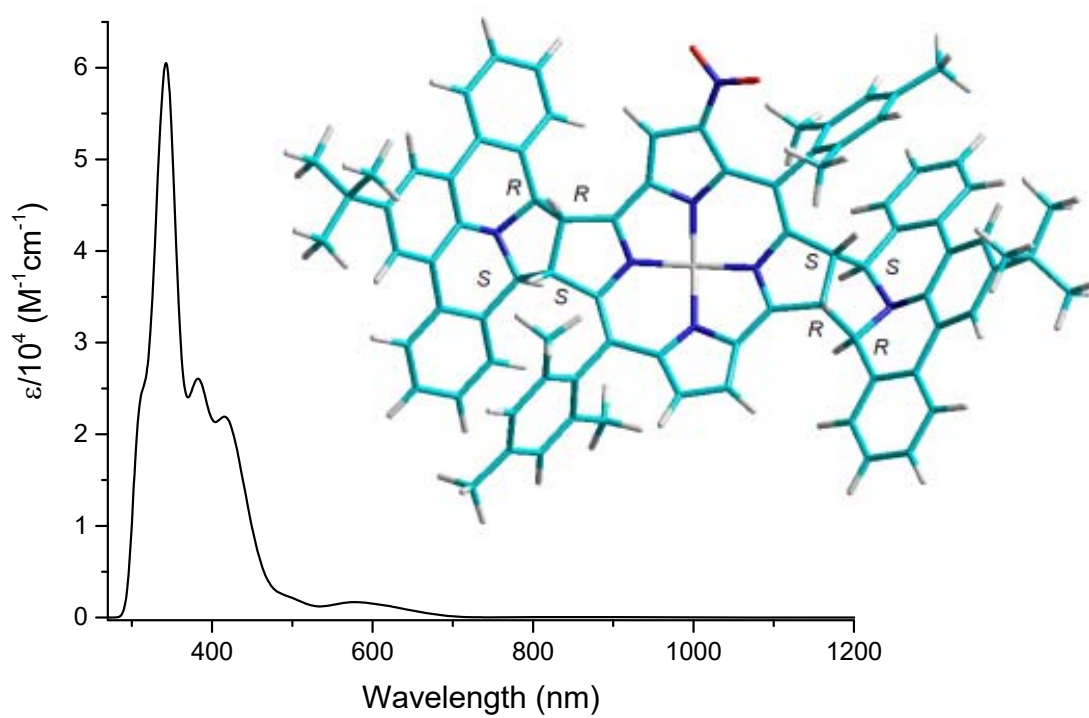

**Figure S130.** TD DFT calculated absorbance (bottom) and ECD (top) spectra of *R,S,S,R,R,S,S,R*-**3** = **3-udud**.



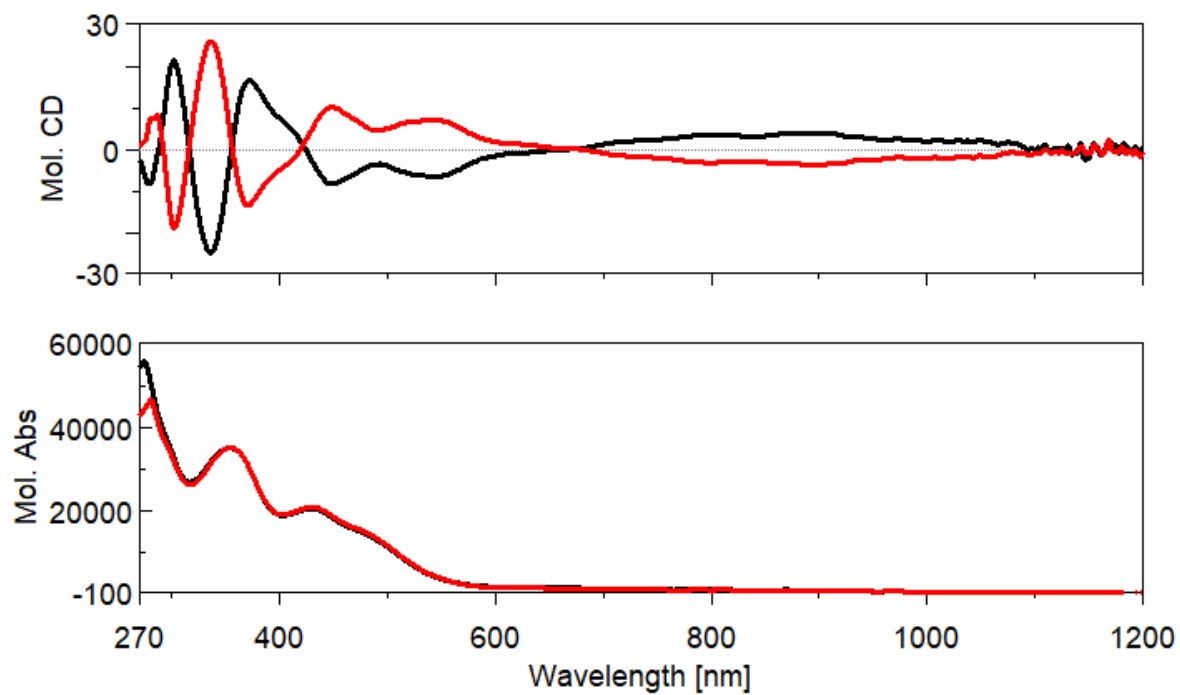

**Figure S131.** Absorbance (bottom) and ECD (top) spectra of *S,R,R,S,S,R,S,R*-**3** = **3-dudd** (black traces) and *R,S,S,R,R,S,R,S*-**3** = **3-uduu** (red traces) recorded in dichloromethane (298 K).

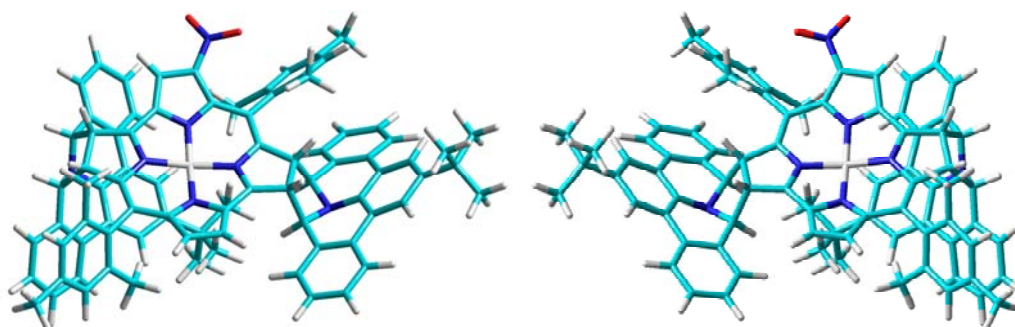

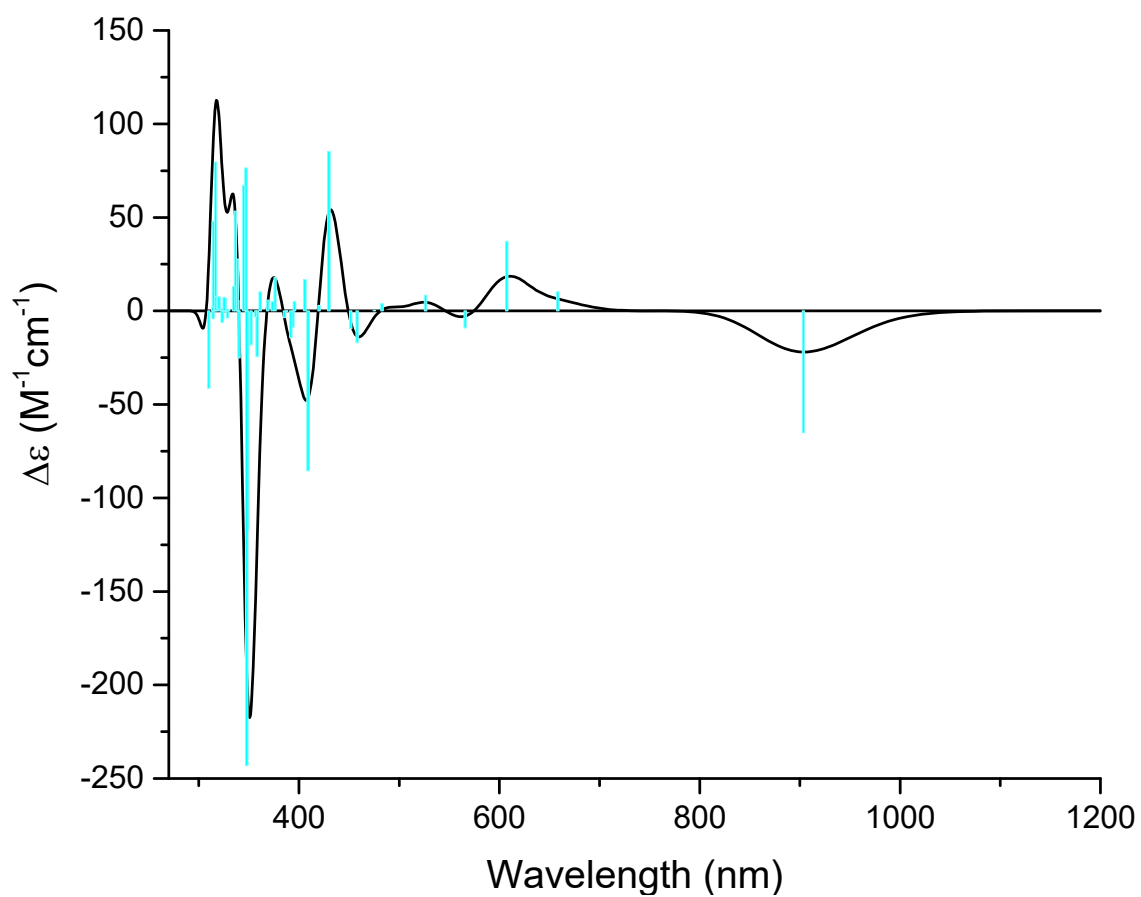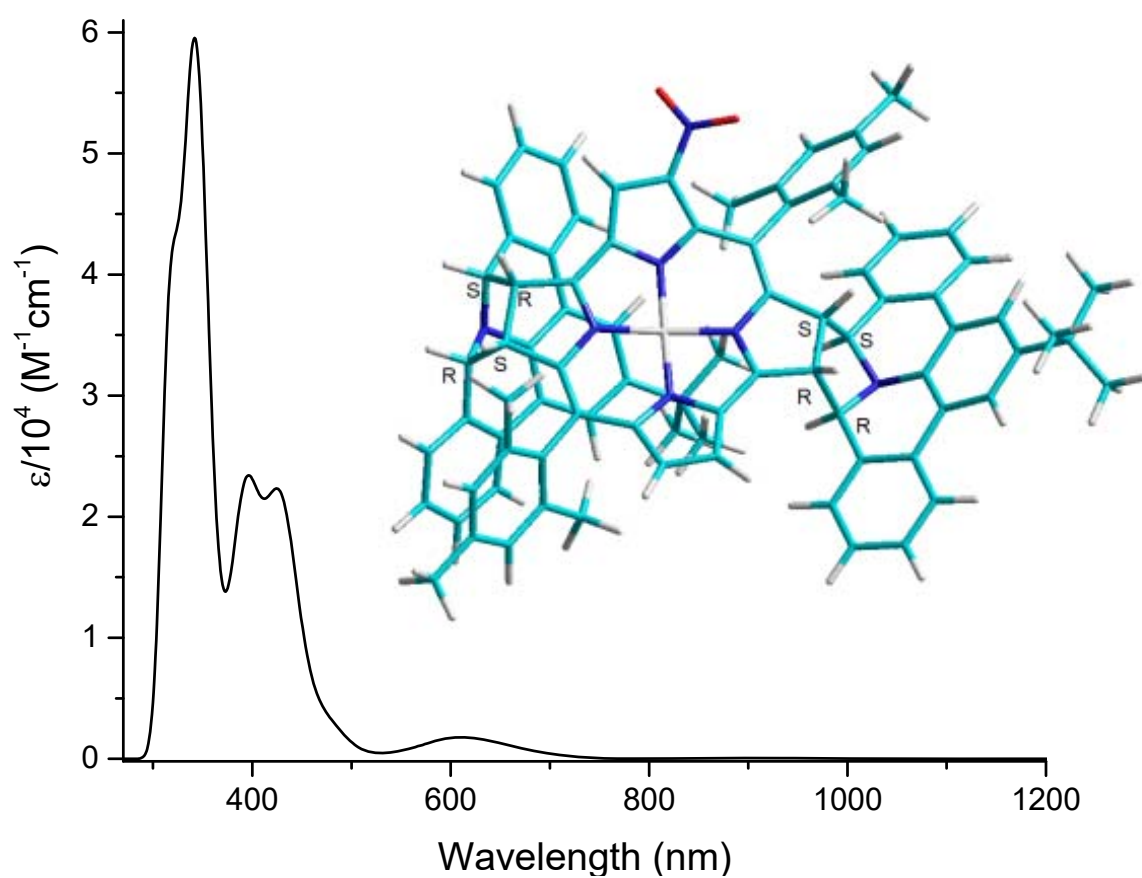

**Figure S132.** TD DFT calculated absorbance (bottom) and ECD (top) spectra of *R,S,S,R,R,S,R,S*-**3** = **3**-uduu.

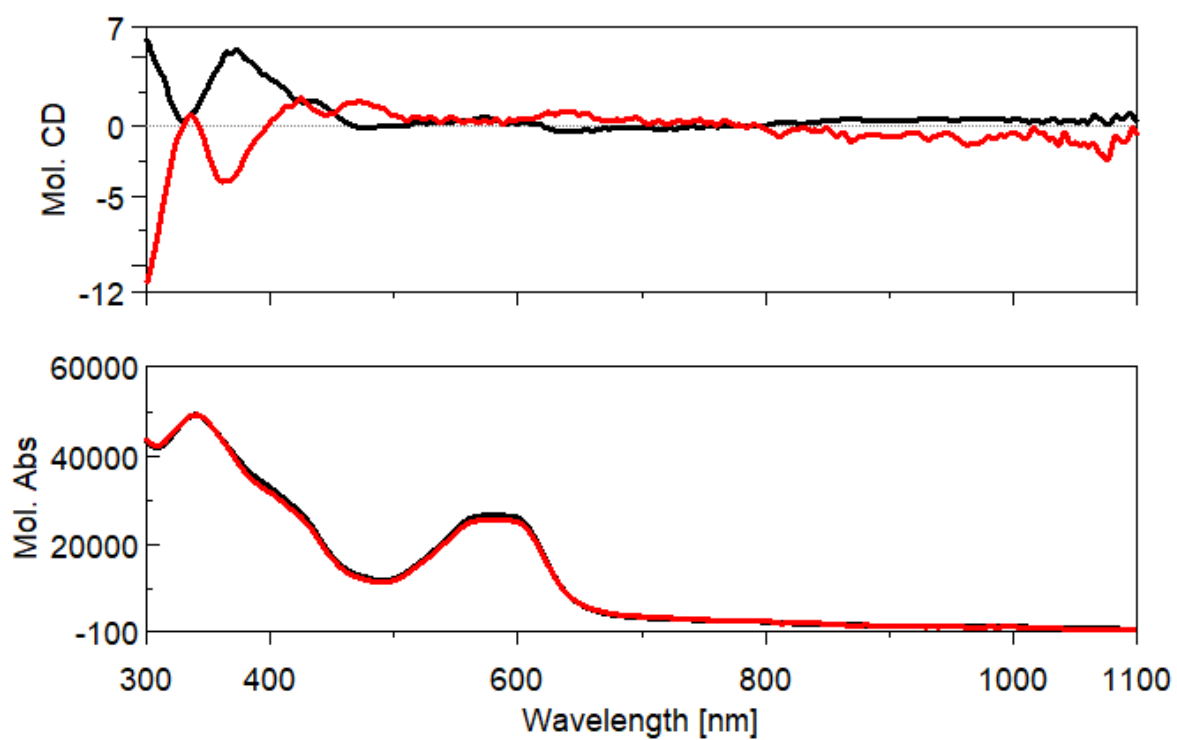

**Figure S133.** Absorbance (bottom) and ECD (top) spectra of *S,R,R,S*-7 (black traces) and *R,S,S,R*-7 (red traces) recorded in dichloromethane (298 K).

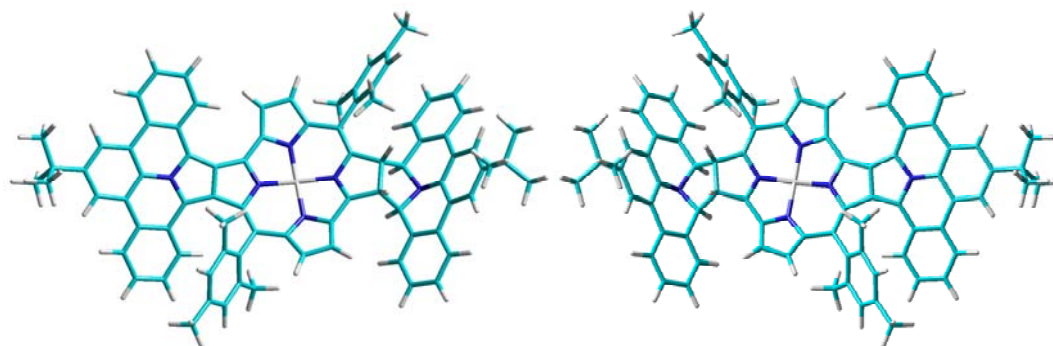

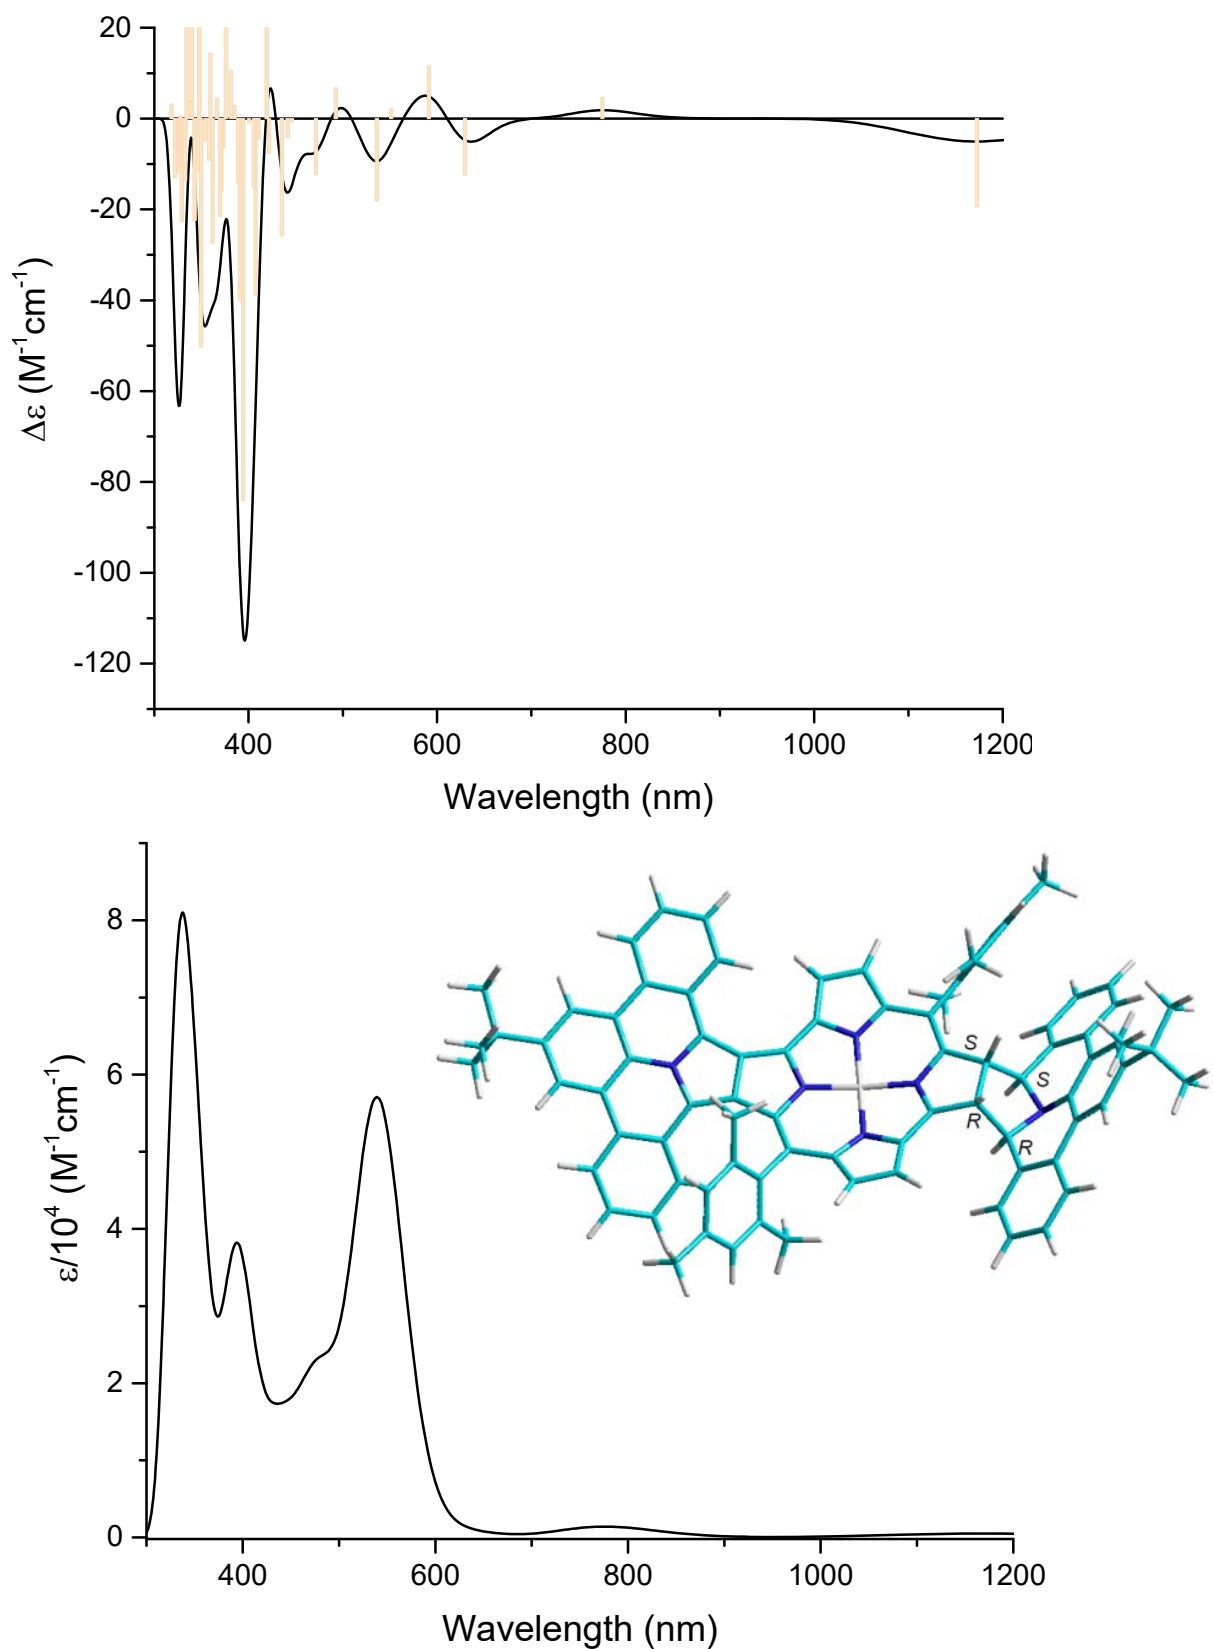

**Figure S134.** TD DFT calculated absorbance (bottom) and ECD (top) spectra of *R,S,S,R*-7.

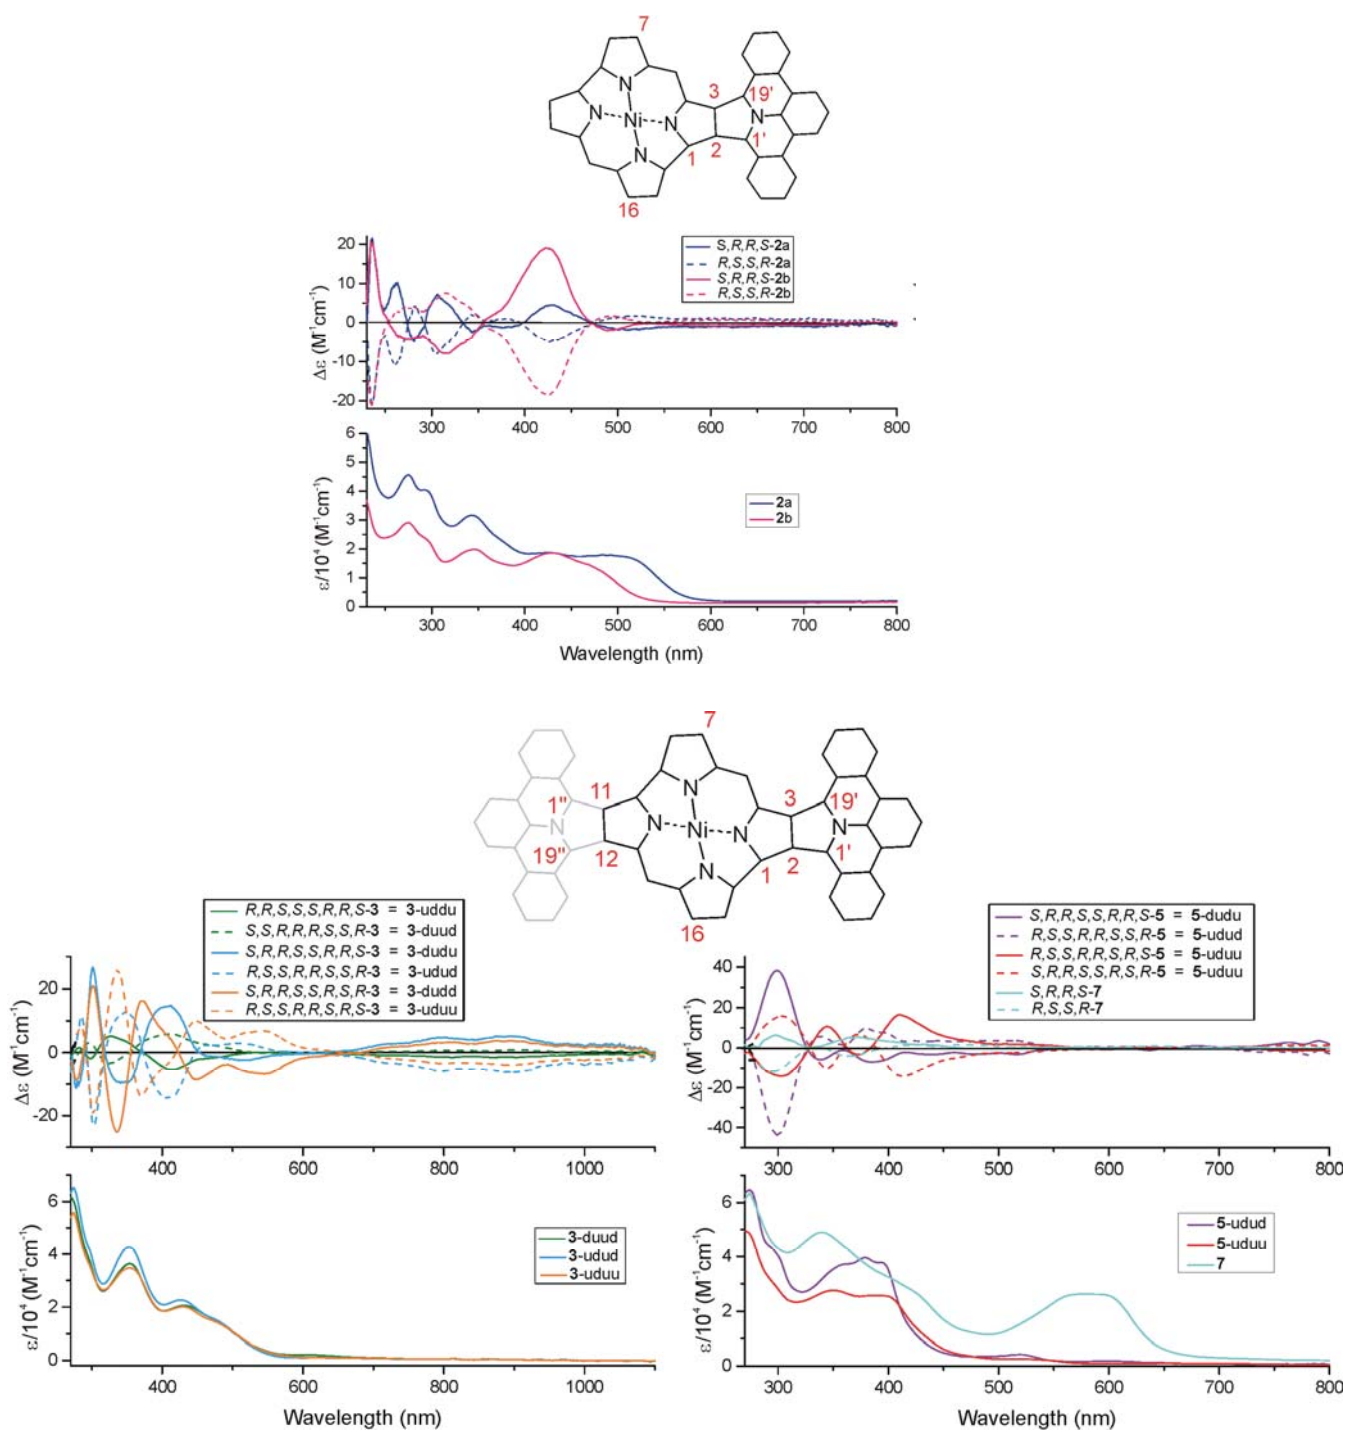

**Figure S135.** Absorption (lower rows) and ECD (upper rows) spectra of the enantiomers of **2-7** in dichloromethane. Configuration assignments is based on the TD DFT simulations of the ECD spectra. The order of the configuration labeling in the legends follows the atom numbering pattern: C2,C3,C19',C1' for monoadducts and **7**, and C2,C3,C19',C1',C11,C12,C19'',C1'' for the diadducts, as shown in the schematic structures.

**Table S2.** TD DFT Calculated Electronic Transitions for **2a**

| No. | Energy (cm <sup>-1</sup> ) | Wavelength (nm) | Osc. Strength | Major contribs                                                        | Minor contribs                                                                                                                                                                         |
|-----|----------------------------|-----------------|---------------|-----------------------------------------------------------------------|----------------------------------------------------------------------------------------------------------------------------------------------------------------------------------------|
| 1   | 8557                       | 1168            | 0.008         | HOMO->LUMO (96%)                                                      |                                                                                                                                                                                        |
| 2   | 122577                     | 815             | 0.0022        | H-2->LUMO (92%)                                                       | H-3->LUMO (3%)                                                                                                                                                                         |
| 3   | 136577                     | 732             | 0.0076        | H-1->LUMO (85%)                                                       | H-5->LUMO (8%), H-4->LUMO (3%)                                                                                                                                                         |
| 4   | 154387                     | 648             | 0.0052        | H-7->LUMO (43%), H-5->LUMO (41%)                                      | H-4->LUMO (8%), H-1->LUMO (5%)                                                                                                                                                         |
| 5   | 16048                      | 623             | 0.008         | H-7->LUMO (51%), H-5->LUMO (21%), H-4->LUMO (15%)                     | H-6->LUMO (3%), H-1->LUMO (7%)                                                                                                                                                         |
| 6   | 17342                      | 577             | 0.0173        | H-3->LUMO (86%)                                                       | H-4->LUMO (6%), H-2->LUMO (3%)                                                                                                                                                         |
| 7   | 18366                      | 544             | 0.0027        | H-5->LUMO (23%), H-4->LUMO (66%)                                      | H-6->LUMO (2%), H-3->LUMO (8%)                                                                                                                                                         |
| 8   | 19693                      | 508             | 0.0064        | H-6->LUMO (93%)                                                       | H-7->LUMO (3%)                                                                                                                                                                         |
| 9   | 21507                      | 465             | 0.0021        | H-8->LUMO (98%)                                                       |                                                                                                                                                                                        |
| 10  | 22659                      | 441             | 0.001         | H-9->LUMO (98%)                                                       |                                                                                                                                                                                        |
| 11  | 22973                      | 435             | 0.1159        | H-2->L+1 (15%), H-2->L+7 (11%), HOMO->L+1 (48%)                       | H-16->LUMO (3%), H-11->LUMO (2%), H-2->L+8 (2%)                                                                                                                                        |
| 12  | 23457                      | 426             | 0.0185        | H-11->LUMO (61%)                                                      | H-12->LUMO (5%), H-2->L+1 (4%), H-2->L+7 (9%), H-2->L+8 (2%), HOMO->L+1 (5%)                                                                                                           |
| 13  | 24056                      | 415             | 0.0707        | H-11->LUMO (18%), H-10->LUMO (11%), H-2->L+7 (18%), HOMO->L+1 (16%)   | H-16->LUMO (5%), H-12->LUMO (2%), H-2->L+8 (5%)                                                                                                                                        |
| 14  | 24985                      | 400             | 0.0468        | H-12->LUMO (14%), H-10->LUMO (74%)                                    | H-1->L+1 (3%), HOMO->L+1 (3%)                                                                                                                                                          |
| 15  | 25424                      | 393             | 0.0294        | H-2->L+1 (62%)                                                        | H-12->LUMO (3%), H-2->L+3 (4%), H-2->L+7 (5%), H-2->L+8 (2%), HOMO->L+1 (3%)                                                                                                           |
| 16  | 25548                      | 391             | 0.023         | H-1->L+1 (70%)                                                        | H-10->LUMO (2%), H-7->L+7 (6%), H-5->L+1 (2%)                                                                                                                                          |
| 17  | 26206                      | 381             | 0.0079        | H-5->L+7 (24%)                                                        | H-20->L+7 (3%), H-12->LUMO (3%), H-7->L+1 (6%), H-7->L+7 (7%), H-5->L+1 (3%), H-5->L+3 (2%), H-5->L+5 (2%), H-5->L+8 (7%), H-4->L+7 (3%), H-2->L+1 (5%), H-2->L+7 (3%), HOMO->L+3 (2%) |
| 18  | 26296                      | 380             | 0.0808        | H-14->LUMO (21%), H-12->LUMO (30%)                                    | H-16->LUMO (3%), H-15->LUMO (9%), H-11->LUMO (6%), H-10->LUMO (2%), H-5->L+1 (7%), H-5->L+7 (2%), H-1->L+1 (2%)                                                                        |
| 19  | 26438                      | 378             | 0.0162        | H-12->LUMO (10%), H-7->L+7 (29%), H-1->L+1 (17%)                      | H-7->L+1 (5%), H-7->L+5 (3%), H-7->L+8 (8%), H-7->L+10 (2%), H-2->L+3 (2%)                                                                                                             |
| 20  | 26585                      | 376             | 0.0116        | HOMO->L+2 (95%)                                                       |                                                                                                                                                                                        |
| 21  | 26890                      | 371             | 0.0381        | H-13->LUMO (87%)                                                      | HOMO->L+3 (4%)                                                                                                                                                                         |
| 22  | 27117                      | 368             | 0.0404        | H-16->LUMO (17%), H-14->LUMO (32%), H-12->LUMO (10%), HOMO->L+3 (19%) | H-5->L+1 (5%)                                                                                                                                                                          |
| 23  | 27518                      | 363             | 0.12          | H-14->LUMO (15%), HOMO->L+3 (37%)                                     | H-15->LUMO (4%), H-13->LUMO (3%), H-12->LUMO (7%), H-11->LUMO (2%), H-4->L+1 (4%), H-3->L+1 (5%)                                                                                       |
| 24  | 27878                      | 358             | 0.0032        | H-15->LUMO (62%), H-14->LUMO (21%)                                    | H-16->LUMO (9%)                                                                                                                                                                        |
| 25  | 28198                      | 354             | 0.012         | H-3->L+1 (44%), HOMO->L+3 (17%)                                       | H-15->LUMO (2%), H-6->L+1 (5%), H-5->L+1 (2%), H-4->L+1 (9%)                                                                                                                           |
| 26  | 28597                      | 349             | 0.018         | H-21->LUMO (44%), H-19->LUMO (16%)                                    | H-20->LUMO (7%), H-18->LUMO (3%), H-16->LUMO (5%), H-14->LUMO (4%), H-5->L+1 (3%)                                                                                                      |
| 27  | 28718                      | 348             | 0.0092        | H-7->L+1 (52%), H-5->L+1 (12%)                                        | H-21->LUMO (5%), H-16->LUMO (5%), H-7->L+3 (3%), H-5->L+7 (2%), H-4->L+1 (6%)                                                                                                          |
| 28  | 28945                      | 345             | 0.0529        | H-1->L+2 (83%)                                                        | H-16->LUMO (2%)                                                                                                                                                                        |
| 29  | 29343                      | 340             | 0.0797        | H-7->L+1 (16%), H-4->L+1 (32%), H-3->L+1 (10%)                        | H-21->LUMO (3%), H-18->LUMO (4%), H-17->LUMO (2%), H-16->LUMO (8%), H-7->L+7 (3%)                                                                                                      |

|    |       |     |        |                                                     |                                                                                                                                                                               |
|----|-------|-----|--------|-----------------------------------------------------|-------------------------------------------------------------------------------------------------------------------------------------------------------------------------------|
| 30 | 29648 | 337 | 0.0592 | H-18->LUMO (14%), H-17->LUMO (19%), H-4->L+1 (28%)  | H-16->LUMO (6%), H-6->L+1 (4%), H-5->L+1 (7%), H-3->L+1 (7%)                                                                                                                  |
| 31 | 29819 | 335 | 0.0212 | H-17->LUMO (40%), H-5->L+1 (28%)                    | H-19->LUMO (2%), H-7->L+1 (4%), H-6->L+1 (7%), H-4->L+1 (2%)                                                                                                                  |
| 32 | 30012 | 333 | 0.0078 | H-18->LUMO (50%), H-17->LUMO (30%)                  | H-5->L+1 (8%)                                                                                                                                                                 |
| 33 | 30449 | 328 | 0.0079 | H-20->LUMO (16%), H-19->LUMO (25%), HOMO->L+4 (15%) | H-21->LUMO (2%), H-11->L+1 (4%), H-6->L+1 (7%), H-3->L+1 (7%), H-2->L+3 (4%)                                                                                                  |
| 34 | 30515 | 327 | 0.0114 | HOMO->L+4 (70%)                                     | H-11->L+1 (2%), H-6->L+1 (9%), H-3->L+1 (5%)                                                                                                                                  |
| 35 | 30581 | 326 | 0.0132 | H-19->LUMO (33%)                                    | H-21->LUMO (5%), H-20->LUMO (9%), H-18->LUMO (3%), H-17->LUMO (3%), H-11->L+1 (3%), H-6->L+1 (8%), H-5->L+1 (3%), H-3->L+1 (6%), H-3->L+3 (2%), H-2->L+3 (3%), HOMO->L+4 (7%) |
| 36 | 30926 | 323 | 0.0095 | H-21->L+7 (11%), HOMO->L+7 (28%)                    | H-21->L+8 (3%), H-20->LUMO (6%), H-19->LUMO (4%), H-19->L+7 (2%), H-2->L+3 (3%), HOMO->L+4 (4%), HOMO->L+5 (7%), HOMO->L+8 (5%)                                               |
| 37 | 31204 | 320 | 0.0208 | H-21->LUMO (28%), H-20->LUMO (44%)                  | H-19->LUMO (6%), H-2->L+3 (5%), HOMO->L+7 (2%)                                                                                                                                |
| 38 | 31413 | 318 | 0.0115 | H-6->L+1 (30%), H-2->L+3 (21%), H-1->L+3 (14%)      | H-18->LUMO (4%), H-5->L+1 (4%), HOMO->L+3 (2%)                                                                                                                                |
| 39 | 31573 | 316 | 0.3428 | H-6->L+1 (10%), H-1->L+3 (27%)                      | H-18->LUMO (6%), H-16->LUMO (8%), H-15->LUMO (3%), H-11->L+1 (5%), H-4->L+1 (4%), H-2->L+2 (4%), H-2->L+3 (5%), HOMO->L+1 (3%), HOMO->L+3 (2%)                                |
| 40 | 31655 | 315 | 0.0071 | H-2->L+2 (90%)                                      | H-1->L+3 (6%)                                                                                                                                                                 |
| 41 | 32046 | 312 | 0.1569 | H-21->L+7 (14%), H-1->L+3 (18%)                     | H-21->L+8 (4%), H-20->L+7 (3%), H-19->L+7 (3%), H-18->LUMO (3%), H-16->LUMO (3%), H-5->L+1 (4%), H-2->L+3 (4%), HOMO->L+5 (3%), HOMO->L+7 (7%)                                |
| 42 | 32099 | 311 | 0.2751 | H-1->L+3 (19%), HOMO->L+7 (11%)                     | H-21->L+7 (9%), H-21->L+8 (2%), H-20->L+7 (2%), H-18->LUMO (5%), H-16->LUMO (7%), H-2->L+2 (2%), HOMO->L+1 (3%), HOMO->L+5 (6%), HOMO->L+8 (2%)                               |
| 43 | 32496 | 307 | 0.0147 | H-11->L+1 (14%), H-2->L+3 (35%), H-1->L+3 (10%)     | H-11->L+3 (3%), H-6->L+1 (8%), H-4->L+1 (2%), HOMO->L+3 (3%), HOMO->L+5 (2%)                                                                                                  |
| 44 | 33409 | 299 | 0.0177 | HOMO->L+5 (65%)                                     | H-4->L+2 (2%), H-3->L+2 (3%), H-1->L+5 (3%), HOMO->L+6 (4%), HOMO->L+7 (9%), HOMO->L+8 (4%)                                                                                   |
| 45 | 33566 | 297 | 0.0025 | HOMO->L+6 (90%)                                     | HOMO->L+7 (5%)                                                                                                                                                                |
| 46 | 33834 | 295 | 0.0117 | H-22->LUMO (42%), H-1->L+4 (42%)                    |                                                                                                                                                                               |
| 47 | 33955 | 294 | 0.0299 | H-4->L+2 (16%), H-3->L+2 (57%)                      | H-6->L+2 (3%), H-5->L+2 (2%), HOMO->L+5 (5%)                                                                                                                                  |
| 48 | 34187 | 292 | 0.013  | H-22->LUMO (47%), H-1->L+4 (32%)                    | H-4->L+2 (4%), H-1->L+5 (3%)                                                                                                                                                  |
| 49 | 34332 | 291 | 0.0046 | H-4->L+3 (11%), H-3->L+3 (32%)                      | H-18->L+1 (6%), H-18->L+3 (4%), H-16->L+1 (4%), H-11->L+1 (7%), H-8->L+1 (3%), H-3->L+2 (4%), H-1->L+4 (6%)                                                                   |
| 50 | 34473 | 290 | 0.0115 | H-6->L+2 (17%), H-4->L+2 (48%), H-3->L+2 (11%)      | H-4->L+3 (6%), H-3->L+3 (5%)                                                                                                                                                  |

**Table S3.** TD DFT Calculated Electronic Transitions for **2b**

| No. | Energy (cm <sup>-1</sup> ) | Wavelength (nm) | Osc. Strength | Major contribs                                                                    | Minor contribs                                                                                                              |
|-----|----------------------------|-----------------|---------------|-----------------------------------------------------------------------------------|-----------------------------------------------------------------------------------------------------------------------------|
| 1   | 8427                       | 1186            | 0.0142        | HOMO->LUMO (96%)                                                                  |                                                                                                                             |
| 2   | 12171                      | 821             | 0.0012        | H-2->LUMO (95%)                                                                   |                                                                                                                             |
| 3   | 14199                      | 704             | 0.0094        | H-4->LUMO (11%), H-1->LUMO (82%)                                                  | H-3->LUMO (3%)                                                                                                              |
| 4   | 15689                      | 637             | 0.0023        | H-6->LUMO (85%), H-4->LUMO (10%)                                                  | H-3->LUMO (2%)                                                                                                              |
| 5   | 16235                      | 615             | 0.0085        | H-6->LUMO (14%), H-4->LUMO (48%), H-3->LUMO (12%), H-1->LUMO (15%)                | H-5->LUMO (4%), HOMO->L+1 (4%)                                                                                              |
| 6   | 17593                      | 568             | 0.0022        | H-5->LUMO (92%)                                                                   | H-4->LUMO (3%), H-3->LUMO (2%)                                                                                              |
| 7   | 19052                      | 524             | 0.0134        | H-4->LUMO (21%), H-3->LUMO (76%)                                                  |                                                                                                                             |
| 8   | 19445                      | 514             | 0.0001        | H-7->LUMO (99%)                                                                   |                                                                                                                             |
| 9   | 20851                      | 479             | 0.0697        | H-8->LUMO (45%), HOMO->L+1 (42%)                                                  | H-2->L+1 (3%)                                                                                                               |
| 10  | 21647                      | 461             | 0.1101        | H-8->LUMO (49%), H-2->L+1 (11%), HOMO->L+1 (26%)                                  | H-11->LUMO (4%)                                                                                                             |
| 11  | 22739                      | 439             | 0.0062        | H-9->LUMO (91%)                                                                   | H-2->L+1 (6%)                                                                                                               |
| 12  | 23394                      | 427             | 0.1272        | H-2->L+1 (69%)                                                                    | H-16->LUMO (3%), H-9->LUMO (4%), H-4->L+1 (2%), H-1->L+1 (5%), HOMO->L+1 (8%)                                               |
| 13  | 23839                      | 419             | 0.0035        | H-2->L+6 (10%), H-2->L+7 (44%)                                                    | H-20->L+7 (3%), H-16->L+7 (2%), H-11->LUMO (4%), H-2->L+8 (8%), H-2->L+9 (3%), H-2->L+10 (5%)                               |
| 14  | 24236                      | 412             | 0.0633        | H-1->L+1 (74%)                                                                    | H-16->LUMO (4%), H-11->LUMO (2%), H-10->LUMO (7%), HOMO->L+1 (3%)                                                           |
| 15  | 24365                      | 410             | 0.035         | H-11->LUMO (21%), H-10->LUMO (47%), H-1->L+1 (15%)                                | HOMO->L+3 (4%)                                                                                                              |
| 16  | 25760                      | 388             | 0.012         | HOMO->L+2 (98%)                                                                   |                                                                                                                             |
| 17  | 26029                      | 384             | 0.1196        | H-11->LUMO (53%), H-10->LUMO (17%)                                                | H-16->LUMO (2%), H-12->LUMO (6%), H-4->L+1 (5%)                                                                             |
| 18  | 26250                      | 380             | 0.0062        | H-6->L+1 (26%), H-6->L+7 (23%), H-4->L+1 (16%)                                    | H-10->LUMO (3%), H-6->L+6 (6%), H-6->L+8 (4%), H-6->L+10 (2%), H-3->L+1 (4%)                                                |
| 19  | 26407                      | 378             | 0.0028        | H-12->LUMO (14%), H-6->L+1 (25%), H-4->L+7 (12%)                                  | H-10->LUMO (2%), H-6->L+7 (8%), H-4->L+1 (3%), H-4->L+6 (3%), H-4->L+8 (2%), H-3->L+7 (3%)                                  |
| 20  | 26684                      | 374             | 0.0249        | H-12->LUMO (60%)                                                                  | H-16->LUMO (2%), H-15->LUMO (9%), H-6->L+1 (6%), H-6->L+7 (3%), H-5->L+1 (3%), HOMO->L+3 (2%)                               |
| 21  | 26914                      | 371             | 0.006         | H-6->L+1 (22%), H-4->L+7 (16%)                                                    | H-13->LUMO (6%), H-12->LUMO (3%), H-5->L+1 (8%), H-4->L+6 (4%), H-4->L+8 (3%), H-3->L+7 (4%), H-1->L+7 (2%), HOMO->L+3 (5%) |
| 22  | 26980                      | 370             | 0.011         | H-13->LUMO (39%), H-6->L+1 (14%), H-5->L+1 (16%)                                  | H-15->LUMO (7%), H-15->L+1 (2%), HOMO->L+3 (4%)                                                                             |
| 23  | 27101                      | 368             | 0.0033        | H-13->LUMO (46%), H-5->L+1 (34%)                                                  | H-15->LUMO (4%), H-15->L+1 (3%), H-12->LUMO (4%)                                                                            |
| 24  | 27601                      | 362             | 0.0019        | H-16->LUMO (11%), H-6->L+7 (12%), H-4->L+1 (22%), H-3->L+1 (10%), HOMO->L+3 (19%) | H-14->LUMO (2%), H-13->LUMO (2%), H-6->L+6 (3%), H-6->L+8 (2%), H-5->L+1 (6%)                                               |
| 25  | 27652                      | 361             | 0.0066        | H-15->LUMO (45%), H-5->L+1 (14%), HOMO->L+3 (14%)                                 | H-6->L+7 (4%), H-4->L+1 (8%), H-3->L+1 (4%)                                                                                 |
| 26  | 28367                      | 352             | 0.0518        | H-21->LUMO (10%), H-15->LUMO (10%), H-3->L+1 (23%), HOMO->L+3 (16%)               | H-19->LUMO (5%), H-16->LUMO (5%), H-14->LUMO (5%), H-12->LUMO (4%), H-10->LUMO (4%), H-5-                                   |



|    |       |     |        |                                                                       |                                                                                                                                  |
|----|-------|-----|--------|-----------------------------------------------------------------------|----------------------------------------------------------------------------------------------------------------------------------|
| 27 | 28529 | 350 | 0.0106 | H-4->L+1 (27%), H-3->L+1 (40%)                                        | >L+1 (3%), H-1->L+2 (3%)<br>H-21->LUMO (7%), H-19->LUMO (4%), H-1->L+2 (5%), HOMO->L+3 (6%)                                      |
| 28 | 28652 | 349 | 0.0007 | H-14->LUMO (76%)                                                      | H-21->LUMO (3%), H-19->LUMO (2%), H-16->LUMO (2%), H-4->L+1 (3%), H-3->L+1 (5%), H-1->L+2 (3%)                                   |
| 29 | 28970 | 345 | 0.0787 | H-1->L+2 (61%)                                                        | H-21->LUMO (7%), H-19->LUMO (3%), H-16->LUMO (5%), H-14->LUMO (9%), H-4->L+1 (2%), H-3->L+1 (4%)                                 |
| 30 | 29021 | 344 | 0.0736 | H-21->LUMO (34%), H-19->LUMO (14%), H-1->L+2 (19%)                    | H-16->LUMO (3%), H-15->LUMO (5%), H-12->LUMO (3%), H-10->LUMO (2%), HOMO->L+3 (2%)                                               |
| 31 | 29375 | 340 | 0.0001 | H-7->L+1 (98%)                                                        |                                                                                                                                  |
| 32 | 29677 | 336 | 0.0193 | HOMO->L+4 (94%)                                                       |                                                                                                                                  |
| 33 | 30466 | 328 | 0.0024 | HOMO->L+6 (14%), HOMO->L+7 (46%)                                      | H-21->L+7 (4%), HOMO->L+8 (8%), HOMO->L+9 (3%), HOMO->L+10 (4%)                                                                  |
| 34 | 30682 | 325 | 0.0105 | H-20->LUMO (23%), H-17->LUMO (10%), H-15->L+1 (11%), H-2->L+3 (13%)   | H-18->LUMO (3%), H-15->L+3 (3%), H-10->L+1 (8%), H-5->L+1 (5%), H-2->L+2 (6%)                                                    |
| 35 | 30861 | 324 | 0.0179 | H-21->LUMO (29%), H-19->LUMO (39%), H-18->LUMO (12%)                  | H-2->L+2 (3%)                                                                                                                    |
| 36 | 31015 | 322 | 0.0074 | H-2->L+2 (82%)                                                        | H-19->LUMO (4%), H-8->L+1 (4%)                                                                                                   |
| 37 | 31128 | 321 | 0.0603 | H-18->LUMO (13%), H-8->L+1 (50%)                                      | H-20->LUMO (2%), H-19->LUMO (7%), H-17->LUMO (3%), H-16->LUMO (3%), H-2->L+2 (7%), H-2->L+3 (5%)                                 |
| 38 | 31229 | 320 | 0.0254 | H-18->LUMO (31%), H-8->L+1 (33%)                                      | H-19->LUMO (8%), H-17->LUMO (8%), H-16->LUMO (3%), H-15->L+1 (4%)                                                                |
| 39 | 31535 | 317 | 0.0007 | H-20->LUMO (11%), H-18->LUMO (16%), H-17->LUMO (37%), H-15->L+1 (13%) | H-15->LUMO (3%), H-15->L+3 (3%), H-10->L+1 (6%), H-5->L+1 (2%)                                                                   |
| 40 | 31778 | 314 | 0.071  | H-20->LUMO (21%), H-18->LUMO (11%), H-17->LUMO (18%)                  | H-21->L+7 (8%), H-19->L+7 (2%), H-16->LUMO (4%), H-15->LUMO (2%), H-15->L+1 (3%), HOMO->L+3 (3%), HOMO->L+5 (2%)                 |
| 41 | 31918 | 313 | 0.1178 | H-2->L+3 (34%)                                                        | H-21->L+7 (5%), H-20->LUMO (5%), H-17->LUMO (4%), H-16->LUMO (8%), H-10->L+1 (6%), H-8->L+1 (3%), HOMO->L+3 (7%), HOMO->L+7 (3%) |
| 42 | 31936 | 313 | 0.0663 | H-21->L+7 (18%), H-20->LUMO (17%), H-17->LUMO (13%)                   | H-21->L+6 (4%), H-21->L+8 (4%), H-21->L+10 (2%), H-19->L+7 (6%), H-16->LUMO (3%), H-10->L+1 (3%), H-2->L+3 (5%), HOMO->L+7 (3%)  |
| 43 | 32337 | 309 | 0.3149 | H-16->LUMO (11%), H-2->L+3 (20%), H-1->L+3 (11%), HOMO->L+5 (11%)     | H-21->L+7 (2%), H-20->LUMO (9%), H-18->LUMO (2%), H-17->LUMO (2%), H-8->L+1 (3%), HOMO->L+3 (3%)                                 |
| 44 | 32476 | 307 | 0.1375 | H-9->L+1 (16%), HOMO->L+5 (61%)                                       | H-16->LUMO (4%), H-2->L+3 (2%), HOMO->L+6 (2%), HOMO->L+10 (3%)                                                                  |
| 45 | 32613 | 306 | 0.0284 | H-9->L+1 (78%)                                                        | H-1->L+3 (3%), HOMO->L+5 (9%)                                                                                                    |
| 46 | 33178 | 301 | 0.1515 | H-1->L+3 (78%)                                                        | H-16->LUMO (4%), H-2->L+3 (3%)                                                                                                   |
| 47 | 33480 | 298 | 0.0013 | HOMO->L+6 (69%), HOMO->L+7 (16%)                                      | HOMO->L+5 (4%), HOMO-                                                                                                            |

|    |       |     |        |                                                                    |                                |
|----|-------|-----|--------|--------------------------------------------------------------------|--------------------------------|
|    |       |     |        |                                                                    | >L+8 (5%)                      |
| 48 | 33984 | 294 | 0.0104 | H-1->L+4 (81%)                                                     | H-22->LUMO (3%)                |
| 49 | 34419 | 290 | 0.025  | HOMO->L+8 (71%), HOMO->L+9 (12%)                                   | H-1->L+4 (3%), HOMO->L+7 (7%)  |
| 50 | 34562 | 289 | 0.0054 | H-11->L+1 (21%), H-10->L+1 (25%), H-5->L+3 (11%), HOMO->L+10 (10%) | H-15->L+1 (8%), HOMO->L+9 (2%) |

**Table S4.** TD DFT Calculated Electronic Transitions for **3-duud**

| No. | Energy (cm <sup>-1</sup> ) | Wavelength (nm) | Osc. Strength | Major contribs                                                     | Minor contribs                                                                                                                                                                |
|-----|----------------------------|-----------------|---------------|--------------------------------------------------------------------|-------------------------------------------------------------------------------------------------------------------------------------------------------------------------------|
| 1   | 11223                      | 891             | 0.0009        | HOMO->LUMO (99%)                                                   |                                                                                                                                                                               |
| 2   | 15395                      | 649             | 0.0085        | H-2->LUMO (73%), H-1->LUMO (19%)                                   | H-4->LUMO (3%)                                                                                                                                                                |
| 3   | 17411                      | 574             | 0.0363        | H-2->LUMO (15%), H-1->LUMO (73%)                                   | H-3->LUMO (7%)                                                                                                                                                                |
| 4   | 18190                      | 549             | 0.0052        | H-3->LUMO (88%)                                                    | H-2->LUMO (5%), H-1->LUMO (4%)                                                                                                                                                |
| 5   | 19493                      | 512             | 0.0027        | H-9->LUMO (39%), H-8->LUMO (53%)                                   | H-7->LUMO (6%)                                                                                                                                                                |
| 6   | 20844                      | 479             | 0.0115        | H-4->LUMO (69%), HOMO->L+1 (10%)                                   | H-9->LUMO (4%), H-7->LUMO (5%), H-5->LUMO (5%), H-2->LUMO (3%)                                                                                                                |
| 7   | 21144                      | 472             | 0.0314        | H-9->LUMO (25%), H-7->LUMO (19%), H-4->LUMO (15%), HOMO->L+1 (22%) | H-8->LUMO (8%), H-5->LUMO (2%), H-1->LUMO (2%)                                                                                                                                |
| 8   | 22042                      | 453             | 0.0031        | H-6->LUMO (17%), H-5->LUMO (69%), H-4->LUMO (11%)                  |                                                                                                                                                                               |
| 9   | 22529                      | 443             | 0.0169        | H-6->LUMO (79%), H-5->LUMO (19%)                                   |                                                                                                                                                                               |
| 10  | 23475                      | 425             | 0.0433        | H-9->LUMO (21%), H-8->LUMO (31%), H-7->LUMO (24%), HOMO->L+1 (11%) | H-2->L+1 (5%)                                                                                                                                                                 |
| 11  | 23588                      | 423             | 0.1525        | H-7->LUMO (37%), H-2->L+1 (14%), HOMO->L+1 (29%)                   | H-21->LUMO (2%), H-5->LUMO (2%), H-1->L+1 (2%), HOMO->L+4 (3%)                                                                                                                |
| 12  | 24896                      | 401             | 0.0162        | H-2->L+13 (32%)                                                    | H-4->L+13 (2%), H-2->L+4 (4%), H-2->L+8 (2%), H-2->L+9 (4%), H-2->L+10 (3%), H-2->L+14 (6%), H-2->L+15 (3%), H-1->L+13 (8%)                                                   |
| 13  | 25029                      | 399             | 0.0048        | H-10->LUMO (87%)                                                   | H-12->LUMO (5%)                                                                                                                                                               |
| 14  | 25625                      | 390             | 0.0193        | H-2->L+1 (10%), HOMO->L+2 (74%)                                    | H-1->L+1 (7%), HOMO->L+1 (2%)                                                                                                                                                 |
| 15  | 25696                      | 389             | 0.169         | H-2->L+1 (25%), H-1->L+1 (18%), HOMO->L+1 (10%), HOMO->L+2 (24%)   | H-3->L+1 (2%), HOMO->L+3 (3%)                                                                                                                                                 |
| 16  | 25937                      | 385             | 0.0051        | HOMO->L+3 (95%)                                                    | H-2->L+1 (2%)                                                                                                                                                                 |
| 17  | 26424                      | 378             | 0.0014        | H-12->LUMO (19%), H-11->LUMO (55%), H-1->L+1 (15%)                 | H-2->L+1 (5%)                                                                                                                                                                 |
| 18  | 26479                      | 377             | 0.0232        | H-11->LUMO (23%), H-2->L+1 (21%), H-1->L+1 (46%)                   |                                                                                                                                                                               |
| 19  | 27192                      | 367             | 0.015         | H-3->L+1 (75%)                                                     | H-14->LUMO (3%), H-9->L+13 (2%), H-8->L+13 (2%), H-2->L+1 (4%), H-1->L+1 (2%), HOMO->L+4 (3%)                                                                                 |
| 20  | 27315                      | 366             | 0.0589        | H-12->LUMO (27%), H-11->LUMO (10%), HOMO->L+4 (22%)                | H-21->LUMO (3%), H-14->LUMO (5%), H-13->LUMO (5%), H-10->LUMO (2%), H-3->L+1 (9%)                                                                                             |
| 21  | 27693                      | 361             | 0.0119        | H-13->LUMO (11%), H-8->L+13 (13%)                                  | H-14->LUMO (7%), H-12->LUMO (9%), H-11->LUMO (3%), H-9->L+13 (9%), H-9->L+14 (2%), H-8->L+4 (3%), H-8->L+14 (2%), H-7->L+1 (3%), H-4->L+1 (4%), H-3->L+1 (7%), HOMO->L+4 (2%) |
| 22  | 27914                      | 358             | 0.0166        | H-13->LUMO (20%), H-4->L+1 (21%)                                   | H-20->L+1 (3%), H-14->LUMO (9%), H-12->LUMO (8%), H-9->L+13 (3%), H-8->L+13 (3%), H-5->L+1 (6%)                                                                               |
| 23  | 28099                      | 355             | 0.0086        | H-14->LUMO (12%), H-13->LUMO (14%), H-4->L+1 (23%)                 | H-9->L+13 (3%), H-8->L+13 (7%), H-7->L+1 (3%), H-5->L+1 (6%), HOMO->L+4                                                                                                       |

|    |       |     |        |                                                                    |                                                                                                                                                                       |
|----|-------|-----|--------|--------------------------------------------------------------------|-----------------------------------------------------------------------------------------------------------------------------------------------------------------------|
| 24 | 28495 | 350 | 0.0104 | H-9->L+13 (15%)                                                    | (4%)<br>H-21->L+13 (3%), H-12->L+13 (5%), H-9->L+4 (3%), H-9->L+14 (2%), H-8->L+1 (8%), H-8->L+13 (4%), H-7->L+1 (2%), H-7->L+13 (9%), H-1->L+13 (2%), HOMO->L+4 (3%) |
| 25 | 28695 | 348 | 0.099  | H-14->LUMO (37%), H-13->LUMO (11%), HOMO->L+4 (18%)                | H-21->LUMO (2%), H-12->LUMO (9%), H-1->L+3 (7%)                                                                                                                       |
| 26 | 29056 | 344 | 0.0228 | H-3->L+2 (58%), H-1->L+2 (13%), H-1->L+3 (15%)                     |                                                                                                                                                                       |
| 27 | 29089 | 343 | 0.1764 | H-3->L+2 (13%), H-1->L+3 (50%)                                     | H-14->LUMO (9%), H-13->LUMO (6%), H-3->L+3 (3%), H-2->L+3 (5%), H-1->L+2 (2%)                                                                                         |
| 28 | 29340 | 340 | 0.2399 | H-15->LUMO (21%), H-13->LUMO (21%), HOMO->L+4 (14%)                | H-21->LUMO (4%), H-17->LUMO (6%), H-14->LUMO (9%), H-12->LUMO (6%), H-1->L+3 (4%)                                                                                     |
| 29 | 29465 | 339 | 0.0058 | H-9->L+1 (37%), H-8->L+1 (41%)                                     | H-8->L+4 (3%), H-7->L+1 (3%), HOMO->L+5 (3%)                                                                                                                          |
| 30 | 29543 | 338 | 0.0177 | HOMO->L+5 (91%)                                                    |                                                                                                                                                                       |
| 31 | 29610 | 337 | 0.006  | H-7->L+1 (13%), H-6->L+1 (19%), H-5->L+1 (46%), H-4->L+1 (10%)     | H-15->LUMO (2%), H-8->L+1 (4%)                                                                                                                                        |
| 32 | 29898 | 334 | 0.0036 | HOMO->L+6 (96%)                                                    |                                                                                                                                                                       |
| 33 | 30069 | 332 | 0.0703 | H-15->LUMO (68%)                                                   | H-21->LUMO (2%), H-17->LUMO (3%), H-16->LUMO (3%), H-13->LUMO (3%), H-12->LUMO (3%), HOMO->L+4 (5%)                                                                   |
| 34 | 30372 | 329 | 0.0208 | H-17->LUMO (14%), H-16->LUMO (75%)                                 | H-15->LUMO (3%), H-2->L+2 (3%)                                                                                                                                        |
| 35 | 30474 | 328 | 0.0035 | H-2->L+2 (68%), H-1->L+2 (16%)                                     | H-16->LUMO (4%), H-3->L+2 (7%)                                                                                                                                        |
| 36 | 30608 | 326 | 0.0452 | H-17->LUMO (54%)                                                   | H-20->L+1 (3%), H-16->LUMO (8%), H-14->L+1 (2%), H-4->L+1 (5%), HOMO->L+4 (3%)                                                                                        |
| 37 | 30691 | 325 | 0.0306 | H-20->LUMO (15%), H-17->LUMO (15%), H-4->L+1 (15%)                 | H-20->L+1 (8%), H-18->LUMO (5%), H-16->LUMO (6%), H-14->L+1 (4%), H-13->L+1 (2%), H-9->L+1 (4%), H-8->L+1 (6%), H-2->L+2 (2%), H-2->L+4 (2%)                          |
| 38 | 30956 | 323 | 0.0116 | H-20->LUMO (28%), H-18->LUMO (15%), H-9->L+1 (13%)                 | H-8->L+1 (5%), H-7->L+1 (8%), H-2->L+4 (8%), HOMO->L+9 (2%), HOMO->L+13 (3%)                                                                                          |
| 39 | 31066 | 321 | 0.0054 | H-2->L+3 (87%)                                                     | H-1->L+3 (7%)                                                                                                                                                         |
| 40 | 31284 | 319 | 0.0023 | H-6->L+1 (57%), H-5->L+1 (25%)                                     | H-20->LUMO (2%), H-19->LUMO (3%)                                                                                                                                      |
| 41 | 31354 | 318 | 0.0181 | H-18->LUMO (12%), H-7->L+1 (25%), H-6->L+1 (11%), HOMO->L+13 (11%) | H-20->LUMO (6%), H-4->L+1 (8%), HOMO->L+8 (5%), HOMO->L+9 (3%), HOMO->L+14 (3%)                                                                                       |
| 42 | 31474 | 317 | 0.0056 | H-18->LUMO (14%), H-2->L+2 (12%), H-1->L+2 (35%)                   | H-20->LUMO (8%), H-7->L+1 (5%), H-3->L+2 (5%), H-2->L+4 (3%), HOMO->L+13 (5%)                                                                                         |
| 43 | 31491 | 317 | 0.0202 | H-20->LUMO (16%), H-18->LUMO (19%), H-2->L+2 (11%), H-1->L+2 (27%) | H-7->L+1 (7%), H-3->L+2 (5%)                                                                                                                                          |
| 44 | 31590 | 316 | 0.0115 | H-18->LUMO (26%), H-7->L+1 (10%), HOMO->L+13 (14%)                 | H-21->LUMO (4%), H-20->LUMO (6%), H-9->L+1 (5%), HOMO->L+7 (3%), HOMO->L+8 (5%), HOMO->L+9 (5%)                                                                       |
| 45 | 31829 | 314 | 0.0017 | H-2->L+4 (17%)                                                     | H-25->LUMO (3%), H-24->LUMO (3%), H-21->LUMO (3%), H-19->LUMO (2%), H-9->L+1 (8%), H-8->L+1                                                                           |

|    |       |     |        |                                    |                                                                                                                                                                                            |
|----|-------|-----|--------|------------------------------------|--------------------------------------------------------------------------------------------------------------------------------------------------------------------------------------------|
|    |       |     |        |                                    | (8%), H-7->L+1 (4%), H-4->L+1 (3%), H-1->L+4 (9%), HOMO->L+7 (3%), HOMO->L+8 (5%), HOMO->L+13 (3%)                                                                                         |
| 46 | 31937 | 313 | 0.0526 | H-19->LUMO (84%)                   | H-21->LUMO (2%), H-20->LUMO (3%)                                                                                                                                                           |
| 47 | 32115 | 311 | 0.051  | H-25->LUMO (34%), H-24->LUMO (29%) | H-21->LUMO (8%), H-9->L+1 (3%), H-8->L+1 (2%), H-2->L+4 (5%)                                                                                                                               |
| 48 | 32476 | 307 | 0.0085 | H-1->L+4 (11%)                     | H-20->LUMO (2%), H-20->L+1 (9%), H-14->L+1 (9%), H-13->L+1 (7%), H-12->L+1 (2%), H-10->L+1 (6%), H-9->L+1 (6%), H-8->L+1 (8%), H-7->L+1 (5%), H-5->L+1 (5%), H-2->L+4 (4%), HOMO->L+7 (2%) |
| 49 | 32543 | 307 | 0.0006 | H-3->L+3 (93%)                     | H-1->L+3 (6%)                                                                                                                                                                              |
| 50 | 32613 | 306 | 0.0719 | HOMO->L+7 (66%), HOMO->L+8 (11%)   | HOMO->L+11 (3%)                                                                                                                                                                            |

**Table S5.** TD DFT Calculated Electronic Transitions for **3-udud**

| No. | Energy (cm <sup>-1</sup> ) | Wavelength (nm) | Osc. Strength | Major contribs                                                    | Minor contribs                                                                                                            |
|-----|----------------------------|-----------------|---------------|-------------------------------------------------------------------|---------------------------------------------------------------------------------------------------------------------------|
| 1   | 11494                      | 870             | 0.0005        | HOMO->LUMO (98%)                                                  |                                                                                                                           |
| 2   | 15917                      | 628             | 0.0072        | H-3->LUMO (85%)                                                   | H-4->LUMO (5%), H-2->LUMO (3%)                                                                                            |
| 3   | 17158                      | 582             | 0.0078        | H-1->LUMO (92%)                                                   | H-2->LUMO (3%)                                                                                                            |
| 4   | 17955                      | 556             | 0.0077        | H-2->LUMO (91%)                                                   | H-3->LUMO (4%), H-1->LUMO (2%)                                                                                            |
| 5   | 19879                      | 503             | 0.0029        | H-9->LUMO (89%)                                                   | H-8->LUMO (5%), H-4->LUMO (2%)                                                                                            |
| 6   | 20123                      | 496             | 0.0125        | H-4->LUMO (88%)                                                   | H-9->LUMO (2%), H-5->LUMO (3%), H-3->LUMO (5%)                                                                            |
| 7   | 21127                      | 473             | 0.0058        | H-8->LUMO (52%), HOMO->L+1 (35%)                                  | H-9->LUMO (4%), H-1->LUMO (2%)                                                                                            |
| 8   | 21676                      | 461             | 0.0056        | H-5->LUMO (89%)                                                   | H-7->LUMO (7%), H-4->LUMO (3%)                                                                                            |
| 9   | 22385                      | 446             | 0.0209        | H-6->LUMO (97%)                                                   |                                                                                                                           |
| 10  | 22881                      | 437             | 0.0078        | H-7->LUMO (92%)                                                   | H-5->LUMO (6%)                                                                                                            |
| 11  | 22937                      | 435             | 0.0548        | H-8->LUMO (12%), H-3->L+1 (15%), H-3->L+10 (21%), HOMO->L+1 (15%) | H-4->L+10 (3%), H-3->L+8 (5%)                                                                                             |
| 12  | 24015                      | 416             | 0.1332        | H-3->L+10 (19%), HOMO->L+1 (26%)                                  | H-21->LUMO (3%), H-10->LUMO (6%), H-8->LUMO (9%), H-4->L+10 (2%), H-3->L+1 (4%), H-3->L+8 (5%)                            |
| 13  | 24725                      | 404             | 0.0355        | H-10->LUMO (85%)                                                  | H-12->LUMO (4%), H-8->LUMO (3%)                                                                                           |
| 14  | 25749                      | 388             | 0.0051        | H-9->L+10 (14%), H-1->L+1 (63%)                                   | H-9->L+8 (4%), H-4->L+1 (2%)                                                                                              |
| 15  | 25903                      | 386             | 0.0466        | HOMO->L+2 (86%)                                                   | H-3->L+1 (5%), H-2->L+1 (3%)                                                                                              |
| 16  | 25975                      | 384             | 0.0714        | H-3->L+1 (36%), H-2->L+1 (18%), HOMO->L+2 (11%)                   | H-12->LUMO (2%), H-3->L+4 (2%), H-1->L+1 (7%), HOMO->L+1 (7%)                                                             |
| 17  | 26129                      | 382             | 0.0114        | H-11->LUMO (13%), HOMO->L+3 (79%)                                 | H-12->LUMO (2%)                                                                                                           |
| 18  | 26145                      | 382             | 0.0367        | H-11->LUMO (76%), HOMO->L+3 (12%)                                 | H-12->LUMO (4%), H-3->L+1 (2%)                                                                                            |
| 19  | 26296                      | 380             | 0.0042        | H-9->L+10 (30%), H-1->L+1 (21%)                                   | H-9->L+1 (4%), H-9->L+8 (8%), H-9->L+9 (2%), H-9->L+11 (2%), H-8->L+10 (3%), H-3->L+1 (4%), H-2->L+1 (4%), HOMO->L+3 (4%) |
| 20  | 26743                      | 373             | 0.0088        | H-4->L+1 (58%), H-2->L+1 (13%)                                    | H-20->L+1 (3%), H-5->L+1 (5%), H-3->L+1 (5%)                                                                              |
| 21  | 26834                      | 372             | 0.0263        | H-8->L+10 (15%), H-3->L+1 (12%), H-2->L+1 (29%)                   | H-12->L+10 (3%), H-8->L+8 (4%), H-4->L+1 (6%), H-1->L+10 (2%)                                                             |
| 22  | 27042                      | 369             | 0.025         | H-8->L+10 (17%), H-2->L+1 (27%)                                   | H-12->LUMO (7%), H-12->L+10                                                                                               |

|    |       |     |        |                                                                  |                                                                                                                                                                    |
|----|-------|-----|--------|------------------------------------------------------------------|--------------------------------------------------------------------------------------------------------------------------------------------------------------------|
|    |       |     |        |                                                                  | (3%), H-8->L+8 (4%), H-4->L+1 (9%), H-3->L+1 (3%), H-1->L+1 (4%), H-1->L+10 (2%)                                                                                   |
| 23 | 27616 | 362 | 0.0501 | H-12->LUMO (46%), HOMO->L+4 (29%)                                | H-11->LUMO (4%), H-3->L+1 (3%)                                                                                                                                     |
| 24 | 28467 | 351 | 0.024  | H-14->LUMO (38%), H-13->LUMO (32%)                               | H-15->LUMO (4%), H-12->LUMO (5%), HOMO->L+4 (9%)                                                                                                                   |
| 25 | 28771 | 347 | 0.0908 | H-1->L+3 (74%)                                                   | H-14->LUMO (5%), H-2->L+3 (8%)                                                                                                                                     |
| 26 | 28892 | 346 | 0.0911 | H-5->L+1 (12%), H-2->L+2 (51%), H-1->L+2 (15%)                   | H-14->LUMO (4%), H-7->L+1 (4%)                                                                                                                                     |
| 27 | 28960 | 345 | 0.0412 | H-7->L+1 (19%), H-5->L+1 (53%), H-2->L+2 (14%)                   | H-4->L+1 (4%), H-1->L+2 (4%)                                                                                                                                       |
| 28 | 29140 | 343 | 0.1661 | H-14->LUMO (35%), H-13->LUMO (11%), HOMO->L+4 (17%)              | H-21->LUMO (4%), H-12->LUMO (6%), H-8->L+1 (4%), H-5->L+1 (3%), H-1->L+3 (8%)                                                                                      |
| 29 | 29498 | 339 | 0.0195 | H-13->LUMO (26%), H-9->L+1 (33%)                                 | H-15->LUMO (7%), H-14->LUMO (3%), H-8->L+1 (2%), HOMO->L+5 (3%), HOMO->L+8 (3%), HOMO->L+10 (8%)                                                                   |
| 30 | 29648 | 337 | 0.0614 | H-15->LUMO (23%), H-13->LUMO (13%), H-9->L+1 (39%)               | H-17->LUMO (3%), H-9->L+4 (3%), H-8->L+1 (2%), HOMO->L+4 (3%)                                                                                                      |
| 31 | 29770 | 335 | 0.0256 | H-15->LUMO (10%), HOMO->L+5 (45%), HOMO->L+10 (13%)              | H-13->LUMO (2%), H-9->L+1 (3%), HOMO->L+4 (4%), HOMO->L+8 (6%)                                                                                                     |
| 32 | 29998 | 333 | 0.0064 | H-15->LUMO (18%), HOMO->L+5 (28%), HOMO->L+6 (23%)               | H-17->LUMO (3%), HOMO->L+4 (4%), HOMO->L+8 (4%), HOMO->L+10 (8%)                                                                                                   |
| 33 | 30082 | 332 | 0.0019 | HOMO->L+5 (14%), HOMO->L+6 (63%)                                 | HOMO->L+8 (3%), HOMO->L+10 (9%)                                                                                                                                    |
| 34 | 30387 | 329 | 0.0133 | H-17->LUMO (84%), H-15->LUMO (11%)                               | H-16->LUMO (3%)                                                                                                                                                    |
| 35 | 30424 | 328 | 0.1317 | H-16->LUMO (18%), H-15->LUMO (19%)                               | H-21->LUMO (6%), H-14->LUMO (3%), H-13->LUMO (7%), H-12->LUMO (4%), H-8->L+1 (4%), HOMO->L+4 (6%), HOMO->L+5 (4%), HOMO->L+6 (5%), HOMO->L+7 (3%), HOMO->L+10 (3%) |
| 36 | 30550 | 327 | 0.0248 | H-16->LUMO (77%)                                                 | H-17->LUMO (5%), H-15->LUMO (3%)                                                                                                                                   |
| 37 | 30829 | 324 | 0.0027 | H-6->L+1 (87%)                                                   |                                                                                                                                                                    |
| 38 | 30903 | 323 | 0.002  | H-20->LUMO (20%), H-7->L+1 (33%), H-4->L+1 (10%)                 | H-20->L+1 (8%), H-14->L+1 (6%), H-5->L+1 (7%)                                                                                                                      |
| 39 | 31057 | 321 | 0.0006 | H-20->LUMO (13%), H-3->L+2 (60%)                                 | H-8->L+1 (7%), H-7->L+1 (2%), H-6->L+1 (4%), H-2->L+2 (3%)                                                                                                         |
| 40 | 31092 | 321 | 0.0037 | H-20->LUMO (24%), H-8->L+1 (18%), H-7->L+1 (10%), H-3->L+2 (29%) | H-6->L+1 (3%), H-5->L+1 (4%)                                                                                                                                       |
| 41 | 31269 | 319 | 0.0085 | H-2->L+2 (11%), H-1->L+2 (51%)                                   | H-20->L+1 (2%), H-8->L+1 (9%), H-7->L+1 (8%), H-5->L+1 (2%), H-3->L+2 (4%)                                                                                         |
| 42 | 31311 | 319 | 0.0188 | H-8->L+1 (15%), H-7->L+1 (16%), H-1->L+2 (25%)                   | H-20->LUMO (3%), H-20->L+1 (5%), H-14->L+1 (3%), H-5->L+1 (6%), H-3->L+3 (4%), H-2->L+2 (7%)                                                                       |
| 43 | 31379 | 318 | 0.0004 | H-3->L+3 (71%)                                                   | H-8->L+1 (7%), H-3->L+4 (2%), H-2->L+3 (8%)                                                                                                                        |
| 44 | 31616 | 316 | 0.0005 | H-24->L+10 (10%), H-3->L+4 (11%)                                 | H-26->L+10 (6%), H-25->L+10 (5%), H-24->LUMO (2%), H-24->L+8 (2%), H-20->LUMO (7%), H-8->L+1 (5%), H-3->L+3 (5%), HOMO->L+8 (7%), HOMO->L+10 (4%)                  |
| 45 | 31750 | 314 | 0.0098 | H-18->LUMO (84%)                                                 |                                                                                                                                                                    |
| 46 | 31858 | 313 | 0.007  | H-20->LUMO (10%), H-18->LUMO (10%)                               | H-26->L+10 (4%), H-25->L+10 (3%), H-24->L+10 (5%), H-20->L+1 (7%), H-19->LUMO (6%), H-14->L+1 (6%), H-8->L+1 (5%), H-3->L+4 (2%), HOMO->L+7 (2%), HOMO->L+10 (3%)  |
| 47 | 32094 | 311 | 0.0325 | H-19->LUMO (84%)                                                 | H-20->LUMO (6%)                                                                                                                                                    |
| 48 | 32205 | 310 | 0.0025 | H-2->L+3 (50%)                                                   | H-20->LUMO (2%), H-14->L+1                                                                                                                                         |

|    |       |     |        |                                |                                                                                                             |
|----|-------|-----|--------|--------------------------------|-------------------------------------------------------------------------------------------------------------|
|    |       |     |        |                                | (2%), H-4->L+3 (2%), H-3->L+3 (5%), H-3->L+4 (9%), H-1->L+3 (6%), H-1->L+4 (5%)                             |
| 49 | 32290 | 309 | 0.0036 | H-3->L+4 (25%), H-2->L+3 (24%) | H-20->LUMO (3%), H-14->L+1 (2%), H-10->L+1 (3%), H-3->L+3 (9%), H-2->L+4 (4%), H-1->L+3 (3%), H-1->L+4 (5%) |
| 50 | 32494 | 307 | 0.1347 | HOMO->L+7 (79%)                |                                                                                                             |

**Table S6.** TD DFT Calculated Electronic Transitions for **3-uduu**

| No. | Energy (cm <sup>-1</sup> ) | Wavelength (nm) | Osc. Strength | Major contribs                                    | Minor contribs                                                                                                                                                |
|-----|----------------------------|-----------------|---------------|---------------------------------------------------|---------------------------------------------------------------------------------------------------------------------------------------------------------------|
| 1   | 11068                      | 903             | 0.0006        | HOMO->LUMO (99%)                                  |                                                                                                                                                               |
| 2   | 15191                      | 658             | 0.006         | H-3->LUMO (26%), H-2->LUMO (45%), H-1->LUMO (22%) | H-4->LUMO (3%)                                                                                                                                                |
| 3   | 16461                      | 607             | 0.0129        | H-3->LUMO (39%), H-1->LUMO (58%)                  |                                                                                                                                                               |
| 4   | 17670                      | 565             | 0.0042        | H-3->LUMO (30%), H-2->LUMO (50%), H-1->LUMO (16%) |                                                                                                                                                               |
| 5   | 18998                      | 526             | 0.0018        | H-8->LUMO (53%), H-6->LUMO (18%), H-5->LUMO (16%) | H-7->LUMO (7%)                                                                                                                                                |
| 6   | 20708                      | 482             | 0.0007        | H-7->LUMO (44%), HOMO->L+1 (29%)                  | H-9->LUMO (8%), H-6->LUMO (2%), H-4->LUMO (9%)                                                                                                                |
| 7   | 21047                      | 475             | 0.0212        | H-4->LUMO (66%)                                   | H-9->LUMO (4%), H-8->LUMO (5%), H-7->LUMO (4%), H-6->LUMO (7%), H-5->LUMO (8%)                                                                                |
| 8   | 21835                      | 457             | 0.0061        | H-8->LUMO (31%), H-6->LUMO (14%), H-5->LUMO (46%) | H-4->LUMO (8%)                                                                                                                                                |
| 9   | 22140                      | 451             | 0.0061        | H-6->LUMO (57%), H-5->LUMO (22%)                  | H-8->LUMO (5%), H-4->LUMO (9%), HOMO->L+1 (3%)                                                                                                                |
| 10  | 23264                      | 429             | 0.1638        | H-7->LUMO (10%), HOMO->L+1 (40%)                  | H-9->LUMO (8%), H-5->LUMO (3%), H-3->L+1 (5%), H-2->L+1 (9%), HOMO->L+4 (3%)                                                                                  |
| 11  | 23808                      | 420             | 0.0095        | H-9->LUMO (75%), H-7->LUMO (18%)                  | H-8->LUMO (2%)                                                                                                                                                |
| 12  | 24442                      | 409             | 0.0391        | H-3->L+13 (17%), H-2->L+13 (18%)                  | H-24->L+13 (3%), H-4->L+13 (3%), H-1->L+13 (6%), HOMO->L+1 (4%), HOMO->L+3 (6%)                                                                               |
| 13  | 24632                      | 405             | 0.0048        | HOMO->L+3 (83%)                                   | H-3->L+1 (2%), H-2->L+1 (3%), HOMO->L+2 (3%)                                                                                                                  |
| 14  | 25282                      | 395             | 0.034         | H-10->LUMO (25%), H-2->L+1 (16%), H-1->L+1 (23%)  | H-12->LUMO (7%), H-3->L+1 (7%), HOMO->L+1 (4%), HOMO->L+3 (4%)                                                                                                |
| 15  | 25393                      | 393             | 0.0826        | H-10->LUMO (59%), H-1->L+1 (17%)                  | H-12->LUMO (3%), H-2->L+1 (6%), HOMO->L+1 (4%), HOMO->L+3 (2%)                                                                                                |
| 16  | 25519                      | 391             | 0.0054        | HOMO->L+2 (93%)                                   | HOMO->L+3 (2%)                                                                                                                                                |
| 17  | 25795                      | 387             | 0.0576        | H-3->L+1 (44%), H-1->L+1 (35%)                    | H-10->LUMO (2%), H-2->L+1 (7%), HOMO->L+1 (2%)                                                                                                                |
| 18  | 25939                      | 385             | 0.0035        | H-11->LUMO (92%)                                  | H-12->LUMO (3%), H-1->L+1 (2%)                                                                                                                                |
| 19  | 26588                      | 376             | 0.0042        | H-3->L+1 (32%), H-2->L+1 (45%)                    | H-12->LUMO (4%), H-8->L+13 (3%), H-1->L+1 (4%)                                                                                                                |
| 20  | 26775                      | 373             | 0.002         | H-8->L+13 (23%), H-1->L+1 (12%)                   | H-13->LUMO (3%), H-8->L+9 (2%), H-8->L+10 (2%), H-7->L+13 (8%), H-6->L+13 (3%), H-5->L+13 (3%), H-3->L+1 (3%), H-2->L+1 (4%), HOMO->L+4 (2%), HOMO->L+13 (2%) |
| 21  | 27113                      | 368             | 0.0206        | H-12->LUMO (29%), HOMO->L+4 (33%)                 | H-10->LUMO (4%), H-8->L+13 (5%), H-2->L+1 (3%)                                                                                                                |
| 22  | 27688                      | 361             | 0.0253        | H-7->L+13 (14%)                                   | H-13->LUMO (7%), H-12->L+13 (5%), H-9->L+13 (5%),                                                                                                             |

|    |       |     |        |                                                     |                                                                                                                                                                            |
|----|-------|-----|--------|-----------------------------------------------------|----------------------------------------------------------------------------------------------------------------------------------------------------------------------------|
|    |       |     |        |                                                     | H-8->L+1 (7%), H-5->L+1 (5%), H-4->L+1 (5%), H-1->L+13 (3%), HOMO->L+4 (6%)                                                                                                |
| 23 | 27917 | 358 | 0.0085 | H-14->LUMO (15%), H-13->LUMO (55%)                  | H-12->LUMO (7%), H-8->L+13 (3%)                                                                                                                                            |
| 24 | 28036 | 356 | 0.0003 | H-5->L+1 (13%), H-4->L+1 (41%)                      | H-20->L+1 (3%), H-13->LUMO (2%), H-13->L+1 (3%), H-9->L+1 (3%), H-8->L+1 (2%), H-6->L+1 (4%), HOMO->L+4 (6%)                                                               |
| 25 | 28391 | 352 | 0.0075 | HOMO->L+5 (76%)                                     | H-12->LUMO (3%), H-1->L+3 (4%), HOMO->L+4 (5%)                                                                                                                             |
| 26 | 28653 | 348 | 0.0828 | H-2->L+2 (16%), H-1->L+2 (48%)                      | H-14->LUMO (5%), H-12->LUMO (6%), H-3->L+2 (5%), H-2->L+3 (3%), HOMO->L+4 (2%), HOMO->L+5 (3%)                                                                             |
| 27 | 28751 | 347 | 0.0527 | H-2->L+3 (14%), H-1->L+3 (30%), HOMO->L+5 (14%)     | H-14->LUMO (4%), H-12->LUMO (4%), H-8->L+1 (4%), H-6->L+1 (3%), H-3->L+3 (6%), H-1->L+2 (7%), HOMO->L+4 (3%)                                                               |
| 28 | 28818 | 346 | 0.0862 | H-8->L+1 (16%), H-6->L+1 (16%), H-1->L+3 (18%)      | H-14->LUMO (3%), H-12->LUMO (2%), H-7->L+1 (5%), H-5->L+1 (5%), H-2->L+2 (4%), H-2->L+3 (6%), H-1->L+2 (3%), HOMO->L+4 (3%)                                                |
| 29 | 29008 | 344 | 0.1119 | H-14->LUMO (35%), H-8->L+1 (13%)                    | H-19->LUMO (2%), H-13->LUMO (5%), H-12->LUMO (5%), H-7->L+1 (6%), H-6->L+1 (5%), H-5->L+1 (3%), H-2->L+2 (2%), H-2->L+3 (2%), H-1->L+2 (4%), H-1->L+3 (3%), HOMO->L+4 (3%) |
| 30 | 29406 | 340 | 0.0036 | H-3->L+3 (61%), H-2->L+3 (23%)                      | H-15->LUMO (3%), H-14->LUMO (4%)                                                                                                                                           |
| 31 | 29498 | 339 | 0.0006 | H-17->LUMO (13%), H-15->LUMO (79%)                  | H-3->L+3 (2%)                                                                                                                                                              |
| 32 | 29556 | 338 | 0.0315 | HOMO->L+6 (76%)                                     | H-14->LUMO (6%), H-13->LUMO (3%), HOMO->L+4 (4%)                                                                                                                           |
| 33 | 29723 | 336 | 0.1444 | H-14->LUMO (14%), HOMO->L+6 (17%)                   | H-13->LUMO (7%), H-12->LUMO (5%), H-7->L+1 (5%), H-6->L+1 (8%), H-5->L+1 (9%), H-4->L+1 (5%), H-3->L+3 (3%), HOMO->L+4 (7%)                                                |
| 34 | 29880 | 334 | 0.078  | H-6->L+1 (22%), H-5->L+1 (25%), H-4->L+1 (11%)      | H-14->LUMO (4%), H-13->LUMO (4%), H-12->LUMO (3%), H-9->L+1 (8%), H-8->L+1 (3%), HOMO->L+4 (4%)                                                                            |
| 35 | 30310 | 329 | 0.0008 | H-17->LUMO (11%), HOMO->L+7 (10%), HOMO->L+13 (21%) | H-25->LUMO (2%), H-25->L+13 (6%), H-24->L+13 (2%), H-9->L+1 (3%), H-7->L+1 (4%), HOMO->L+9 (7%), HOMO->L+10 (5%), HOMO->L+11 (4%)                                          |
| 36 | 30415 | 328 | 0.008  | H-17->LUMO (64%), H-15->LUMO (11%)                  | H-16->LUMO (5%), HOMO->L+7 (3%), HOMO->L+13 (4%)                                                                                                                           |
| 37 | 30631 | 326 | 0.004  | H-3->L+2 (10%), H-2->L+2 (42%), H-1->L+2 (10%)      | H-16->LUMO (3%), H-9->L+1 (3%), H-7->L+1 (2%), H-5->L+1 (2%), H-2->L+3 (3%), H-2->L+4 (2%)                                                                                 |
| 38 | 30654 | 326 | 0.0424 | H-16->LUMO (59%)                                    | H-17->LUMO (6%), H-9->L+1 (3%), H-8->L+1 (3%), H-7->L+1 (9%), H-6->L+1 (3%), H-5->L+1 (4%)                                                                                 |
| 39 | 30737 | 325 | 0.0052 | H-16->LUMO (22%), H-2->L+2 (22%)                    | H-20->L+1 (2%), H-19->LUMO (3%), H-9->L+1 (7%), H-7->L+1 (6%), H-4->L+1 (3%), H-3->L+2 (4%), H-2->L+4 (2%), H-1->L+2 (2%), H-                                              |

|    |       |     |        |                                                                     |                                                                                                                                                                  |
|----|-------|-----|--------|---------------------------------------------------------------------|------------------------------------------------------------------------------------------------------------------------------------------------------------------|
| 40 | 30891 | 323 | 0.0043 | H-20->LUMO (14%), H-6->L+1 (10%), H-2->L+3 (14%), H-1->L+3 (16%)    | 1->L+4 (3%)<br>H-18->LUMO (7%), H-16->LUMO (3%), H-8->L+1 (8%), H-5->L+1 (6%), H-4->L+1 (4%), H-3->L+3 (5%)                                                      |
| 41 | 30933 | 323 | 0.0066 | H-20->LUMO (31%), H-19->LUMO (15%)                                  | H-18->LUMO (7%), H-8->L+1 (6%), H-7->L+1 (7%), H-4->L+1 (4%), H-3->L+3 (3%), H-2->L+3 (9%), H-1->L+3 (7%)                                                        |
| 42 | 31010 | 322 | 0.0169 | H-8->L+1 (16%), H-6->L+1 (11%), H-2->L+3 (17%), H-1->L+3 (12%)      | H-20->L+1 (3%), H-19->LUMO (3%), H-13->L+1 (2%), H-9->L+1 (6%), H-5->L+1 (6%), H-3->L+3 (7%)                                                                     |
| 43 | 31244 | 320 | 0.0036 | H-7->L+1 (13%), H-2->L+4 (11%)                                      | H-25->LUMO (5%), H-25->L+13 (3%), H-24->LUMO (6%), H-20->LUMO (3%), H-19->LUMO (8%), H-8->L+1 (2%), H-3->L+4 (5%), H-1->L+4 (6%), HOMO->L+7 (7%), HOMO->L+8 (3%) |
| 44 | 31433 | 318 | 0.0022 | H-3->L+2 (71%), H-1->L+2 (18%)                                      | H-3->L+3 (2%), H-2->L+2 (6%)                                                                                                                                     |
| 45 | 31565 | 316 | 0.1831 | H-19->LUMO (19%), H-18->LUMO (30%)                                  | H-21->LUMO (6%), H-20->LUMO (7%), H-7->L+1 (9%), H-6->L+1 (3%), H-5->L+1 (3%), HOMO->L+4 (3%), HOMO->L+8 (2%)                                                    |
| 46 | 31638 | 316 | 0.0319 | H-25->LUMO (16%), H-19->LUMO (12%), H-7->L+1 (14%), HOMO->L+7 (16%) | H-25->L+13 (4%), H-24->LUMO (4%), H-8->L+1 (5%), H-4->L+1 (3%)                                                                                                   |
| 47 | 31805 | 314 | 0.0413 | H-9->L+1 (20%), H-2->L+4 (15%), H-1->L+4 (15%)                      | H-25->LUMO (3%), H-24->LUMO (4%), H-20->LUMO (4%), H-18->LUMO (3%), H-8->L+1 (2%), H-4->L+1 (8%), H-3->L+4 (5%)                                                  |
| 48 | 31821 | 314 | 0.0034 | HOMO->L+7 (42%), HOMO->L+9 (25%)                                    | H-20->LUMO (8%), H-19->LUMO (4%), H-18->LUMO (8%), HOMO->L+13 (3%)                                                                                               |
| 49 | 31874 | 313 | 0.0036 | H-20->LUMO (23%), H-19->LUMO (10%), H-18->LUMO (33%)                | H-25->LUMO (6%), HOMO->L+7 (4%), HOMO->L+9 (8%), HOMO->L+13 (2%)                                                                                                 |
| 50 | 32267 | 309 | 0.0297 | H-1->L+4 (16%), HOMO->L+8 (43%)                                     | H-19->LUMO (2%), H-13->L+1 (2%), H-9->L+1 (7%), H-5->L+1 (2%), H-3->L+4 (7%)                                                                                     |

**Table S7.** TD DFT Calculated Electronic Transitions for **4**

| No. | Energy (cm <sup>-1</sup> ) | Wavelength (nm) | Osc. Strength | Major contribs                                                      | Minor contribs                                                               |
|-----|----------------------------|-----------------|---------------|---------------------------------------------------------------------|------------------------------------------------------------------------------|
| 1   | 7334                       | 1363            | 0.0076        | HOMO->LUMO (97%)                                                    |                                                                              |
| 2   | 11400                      | 877             | 0.0007        | H-1->LUMO (97%)                                                     |                                                                              |
| 3   | 14430                      | 692             | 0.0075        | H-3->LUMO (44%), H-2->LUMO (51%)                                    |                                                                              |
| 4   | 15117                      | 661             | 0.0022        | H-4->LUMO (93%)                                                     | H-3->LUMO (3%), H-2->LUMO (3%)                                               |
| 5   | 16667                      | 599             | 0.0173        | H-3->LUMO (46%), H-2->LUMO (44%)                                    | H-4->LUMO (7%)                                                               |
| 6   | 20608                      | 485             | 0.0156        | H-5->LUMO (97%)                                                     |                                                                              |
| 7   | 21895                      | 456             | 0.0002        | H-6->LUMO (88%)                                                     | HOMO->L+1 (5%)                                                               |
| 8   | 22598                      | 442             | 0.003         | H-8->LUMO (91%)                                                     | H-7->LUMO (4%)                                                               |
| 9   | 23088                      | 433             | 0.0371        | HOMO->L+1 (65%), HOMO->L+2 (16%)                                    | H-10->LUMO (6%), H-9->LUMO (4%), H-7->LUMO (3%)                              |
| 10  | 23431                      | 426             | 0.0025        | H-10->LUMO (18%), H-9->LUMO (18%), H-7->LUMO (18%), HOMO->L+2 (38%) |                                                                              |
| 11  | 23587                      | 423             | 0.0015        | H-10->LUMO (11%), H-1->L+10 (38%), H-1->L+11 (10%)                  | H-16->L+10 (4%), H-9->LUMO (3%), H-1->L+7 (6%), H-1->L+8 (3%), H-1->L+9 (9%) |
| 12  | 23670                      | 422             | 0.002         | H-10->LUMO (11%), H-7->LUMO (64%)                                   | H-9->LUMO (7%), H-8->LUMO (6%), H-1->L+10 (4%)                               |
| 13  | 23832                      | 419             | 0.002         | H-11->LUMO (66%), H-10->LUMO (22%), H-9->LUMO (11%)                 |                                                                              |
| 14  | 24721                      | 404             | 0.1592        | H-14->LUMO (13%), HOMO->L+1 (14%), HOMO->L+2 (29%)                  | H-15->LUMO (3%), H-13->LUMO (5%), H-10->LUMO (5%), H-9->LUMO (4%), H-        |



|    |       |     |        |                                                                      |                                                                                                                                                     |
|----|-------|-----|--------|----------------------------------------------------------------------|-----------------------------------------------------------------------------------------------------------------------------------------------------|
|    |       |     |        |                                                                      | 7->LUMO (7%), H-6->LUMO (4%)                                                                                                                        |
| 15 | 25296 | 395 | 0.0015 | H-1->L+1 (54%), H-1->L+2 (34%)                                       | H-4->L+10 (2%)                                                                                                                                      |
| 16 | 26085 | 383 | 0.195  | H-11->LUMO (19%), H-10->LUMO (12%),<br>H-9->LUMO (29%)               | H-3->L+10 (8%), H-3->L+11 (2%),<br>HOMO->L+11 (4%)                                                                                                  |
| 17 | 26577 | 376 | 0.0048 | H-4->L+9 (10%), H-4->L+10 (44%), H-4->L+11 (12%)                     | H-4->L+7 (7%), H-4->L+8 (4%), H-3->L+1 (3%),<br>H-3->L+2 (2%), H-2->L+1 (2%), H-1->L+1 (3%)                                                         |
| 18 | 26660 | 375 | 0.0686 | H-3->L+10 (26%)                                                      | H-11->LUMO (5%), H-10->LUMO (3%),<br>H-9->LUMO (9%), H-3->L+7 (3%), H-3->L+8 (2%),<br>H-3->L+9 (6%), H-3->L+11 (7%), H-2->L+10 (6%), HOMO->L+3 (2%) |
| 19 | 27236 | 367 | 0.0213 | HOMO->L+3 (96%)                                                      |                                                                                                                                                     |
| 20 | 27894 | 358 | 0.0097 | H-17->LUMO (25%), H-12->LUMO (64%)                                   | H-18->LUMO (4%)                                                                                                                                     |
| 21 | 28174 | 354 | 0.0199 | H-18->LUMO (15%), H-17->LUMO (42%),<br>H-12->LUMO (27%)              | H-13->LUMO (2%), H-2->L+1 (7%)                                                                                                                      |
| 22 | 28273 | 353 | 0.059  | H-2->L+1 (68%), H-2->L+2 (10%)                                       | H-17->LUMO (4%), H-12->LUMO (4%)                                                                                                                    |
| 23 | 28608 | 349 | 0.0008 | H-1->L+1 (37%), H-1->L+2 (58%)                                       | H-2->L+1 (3%)                                                                                                                                       |
| 24 | 28834 | 346 | 0.0366 | H-13->LUMO (80%)                                                     | H-14->LUMO (6%), H-2->L+1 (4%)                                                                                                                      |
| 25 | 29044 | 344 | 0.0253 | H-4->L+1 (24%), H-4->L+2 (17%), H-2->L+2 (46%)                       | H-14->LUMO (3%), H-2->L+1 (3%)                                                                                                                      |
| 26 | 29180 | 342 | 0.0123 | H-14->LUMO (10%), H-4->L+1 (27%), H-4->L+2 (19%),<br>H-2->L+2 (21%)  | H-13->LUMO (2%), H-3->L+1 (7%), H-3->L+2 (3%),<br>H-2->L+1 (3%)                                                                                     |
| 27 | 29761 | 336 | 0.0104 | H-16->LUMO (85%)                                                     | H-17->LUMO (4%), H-15->LUMO (4%)                                                                                                                    |
| 28 | 29861 | 334 | 0.0038 | HOMO->L+4 (39%), HOMO->L+10 (31%)                                    | H-17->L+10 (2%), HOMO->L+7 (4%),<br>HOMO->L+8 (3%), HOMO->L+9 (6%),<br>HOMO->L+11 (5%)                                                              |
| 29 | 30292 | 330 | 0.0405 | H-15->LUMO (32%), H-14->LUMO (17%),<br>HOMO->L+4 (12%)               | H-18->LUMO (9%), H-3->L+1 (4%), H-3->L+2 (2%),<br>H-2->L+2 (7%), HOMO->L+10 (2%)                                                                    |
| 30 | 30424 | 328 | 0.0164 | H-15->LUMO (36%), HOMO->L+4 (30%)                                    | H-16->LUMO (2%), H-14->LUMO (5%),<br>HOMO->L+9 (3%), HOMO->L+10 (7%),<br>HOMO->L+11 (4%)                                                            |
| 31 | 30524 | 327 | 0.0236 | H-15->LUMO (10%), H-3->L+1 (27%), H-3->L+2 (13%),<br>HOMO->L+4 (12%) | H-4->L+1 (3%), H-2->L+1 (2%), H-2->L+2 (5%),<br>HOMO->L+6 (2%), HOMO->L+9 (2%), HOMO->L+10 (5%)                                                     |
| 32 | 30999 | 322 | 0.0111 | H-18->LUMO (41%), H-17->LUMO (12%),<br>HOMO->L+5 (29%)               | H-3->L+1 (5%), HOMO->L+4 (3%)                                                                                                                       |
| 33 | 31186 | 320 | 0.0291 | H-18->LUMO (20%), HOMO->L+5 (48%),<br>HOMO->L+6 (18%)                | H-17->LUMO (6%)                                                                                                                                     |
| 34 | 31291 | 319 | 0.0103 | HOMO->L+5 (15%), HOMO->L+6 (74%)                                     |                                                                                                                                                     |
| 35 | 31779 | 314 | 0.003  | H-18->L+10 (12%), H-17->L+10 (32%)                                   | H-18->L+9 (3%), H-18->L+11 (4%), H-17->L+7 (4%),<br>H-17->L+8 (3%), H-17->L+9 (7%), H-17->L+11 (9%),<br>HOMO->L+10 (6%)                             |
| 36 | 32335 | 309 | 0.2537 | H-3->L+1 (42%), H-3->L+2 (30%)                                       | H-15->LUMO (3%), H-14->LUMO (9%)                                                                                                                    |
| 37 | 32574 | 306 | 0.3944 | H-14->LUMO (15%), H-3->L+2 (25%),<br>HOMO->L+7 (19%)                 | H-15->LUMO (4%), HOMO->L+1 (3%),<br>HOMO->L+2 (3%), HOMO->L+8 (8%),<br>HOMO->L+9 (3%), HOMO->L+11 (4%)                                              |
| 38 | 32608 | 306 | 0.0004 | H-1->L+3 (94%)                                                       |                                                                                                                                                     |
| 39 | 32710 | 305 | 0.096  | H-3->L+2 (13%), HOMO->L+7 (41%),<br>HOMO->L+8 (10%)                  | H-15->LUMO (3%), H-14->LUMO (6%),<br>H-1->L+3 (4%), HOMO->L+9 (9%)                                                                                  |
| 40 | 33264 | 300 | 0.0107 | HOMO->L+7 (12%), HOMO->L+8 (67%),<br>HOMO->L+10 (16%)                |                                                                                                                                                     |
| 41 | 33286 | 300 | 0.005  | HOMO->L+9 (67%), HOMO->L+10 (20%)                                    | HOMO->L+7 (4%), HOMO->L+8 (4%)                                                                                                                      |
| 42 | 33613 | 297 | 0.0008 | H-4->L+1 (40%), H-4->L+2 (58%)                                       |                                                                                                                                                     |
| 43 | 33630 | 297 | 0.0119 | H-2->L+3 (85%)                                                       | H-5->L+2 (2%), H-2->L+4 (3%)                                                                                                                        |
| 44 | 34000 | 294 | 0.0105 | H-5->L+1 (61%), H-5->L+2 (32%)                                       |                                                                                                                                                     |
| 45 | 34906 | 286 | 0.0738 | H-1->L+4 (55%), H-1->L+5 (14%)                                       | H-6->L+1 (3%), H-1->L+7 (8%), H-1->L+11 (4%),<br>HOMO->L+11 (4%)                                                                                    |
| 46 | 35002 | 285 | 0.0035 | H-6->L+1 (50%), H-2->L+4 (16%)                                       | H-5->L+1 (4%), H-5->L+2 (8%), H-2->L+5 (3%),<br>H-1->L+4 (5%)                                                                                       |
| 47 | 35325 | 283 | 0.0037 | H-6->L+1 (27%), H-6->L+2 (12%), H-2->L+4 (45%)                       | H-5->L+1 (3%)                                                                                                                                       |
| 48 | 35620 | 280 | 0.1606 | H-6->L+2 (12%), H-5->L+1 (12%), H-5->L+2 (27%),<br>H-2->L+4 (18%)    | H-19->LUMO (2%), H-7->L+1 (3%), H-7->L+2 (2%),<br>H-2->L+5 (5%), HOMO->L+11 (3%)                                                                    |
| 49 | 35814 | 279 | 0.1674 | HOMO->L+11 (30%)                                                     | H-21->LUMO (2%), H-9->L+1 (2%), H-7->L+1 (4%),<br>H-6->L+1 (7%), H-6->L+2 (9%), H-5->L+1 (3%),<br>H-5->L+2 (7%), H-1->L+4 (8%), HOMO->L+7 (3%)      |
| 50 | 35875 | 278 | 0.0007 | H-19->LUMO (82%)                                                     | H-22->LUMO (7%)                                                                                                                                     |

**Table S8.** TD DFT Calculated Electronic Transitions for 5-udud

| No. | Energy (cm <sup>-1</sup> ) | Wavelength (nm) | Osc. Strength | Major contribs                                       | Minor contribs                                                                                                                                     |
|-----|----------------------------|-----------------|---------------|------------------------------------------------------|----------------------------------------------------------------------------------------------------------------------------------------------------|
| 1   | 10877                      | 919             | 0.0001        | HOMO->LUMO (99%)                                     |                                                                                                                                                    |
| 2   | 15439                      | 647             | 0.0056        | H-1->LUMO (96%)                                      |                                                                                                                                                    |
| 3   | 18776                      | 532             | 0.0196        | H-2->LUMO (90%)                                      | H-4->LUMO (6%)                                                                                                                                     |
| 4   | 19308                      | 517             | 0.0016        | H-5->LUMO (66%), H-3->LUMO (33%)                     |                                                                                                                                                    |
| 5   | 19965                      | 500             | 0.0007        | H-5->LUMO (33%), H-3->LUMO (66%)                     |                                                                                                                                                    |
| 6   | 21693                      | 460             | 0.0184        | H-4->LUMO (72%), HOMO->L+3 (10%)                     | H-6->LUMO (3%), H-2->LUMO (8%), HOMO->L+1 (2%)                                                                                                     |
| 7   | 23346                      | 428             | 0.0122        | H-1->L+10 (11%), H-1->L+12 (22%), HOMO->L+1 (46%)    | H-21->L+12 (2%), H-1->L+14 (7%)                                                                                                                    |
| 8   | 23387                      | 427             | 0.0001        | HOMO->L+2 (99%)                                      |                                                                                                                                                    |
| 9   | 23422                      | 426             | 0.0147        | H-1->L+10 (10%), H-1->L+12 (19%), HOMO->L+1 (50%)    | H-1->L+14 (6%), HOMO->L+3 (2%)                                                                                                                     |
| 10  | 24143                      | 414             | 0.0703        | H-6->LUMO (91%)                                      | H-4->LUMO (4%)                                                                                                                                     |
| 11  | 24382                      | 410             | 0.0           | H-7->LUMO (98%)                                      |                                                                                                                                                    |
| 12  | 25485                      | 392             | 0.0138        | H-8->LUMO (83%)                                      | H-12->LUMO (8%), H-10->LUMO (4%)                                                                                                                   |
| 13  | 25929                      | 385             | 0.0001        | H-9->LUMO (57%), H-5->L+12 (16%)                     | H-5->L+10 (8%), H-5->L+14 (5%), H-1->L+3 (6%)                                                                                                      |
| 14  | 26127                      | 382             | 0.0           | H-9->LUMO (41%), H-5->L+10 (11%), H-5->L+12 (22%)    | H-5->L+14 (7%), H-1->L+3 (8%)                                                                                                                      |
| 15  | 26432                      | 378             | 0.1009        | H-12->LUMO (21%), HOMO->L+3 (49%)                    | H-20->LUMO (3%), H-18->LUMO (5%), H-10->LUMO (3%), H-8->LUMO (6%), H-4->LUMO (2%), HOMO->L+5 (3%)                                                  |
| 16  | 27010                      | 370             | 0.0051        | H-4->L+10 (15%), H-4->L+12 (30%)                     | H-21->L+12 (2%), H-12->L+10 (3%), H-12->L+12 (5%), H-4->L+14 (9%), H-4->L+16 (2%), H-2->L+10 (3%), H-2->L+12 (7%)                                  |
| 17  | 27399                      | 364             | 0.0054        | H-12->LUMO (22%), H-10->LUMO (75%)                   |                                                                                                                                                    |
| 18  | 27432                      | 364             | 0.0           | HOMO->L+4 (94%)                                      | H-11->LUMO (4%)                                                                                                                                    |
| 19  | 27533                      | 363             | 0.0005        | H-11->LUMO (94%)                                     | HOMO->L+4 (4%)                                                                                                                                     |
| 20  | 27553                      | 362             | 0.0155        | HOMO->L+5 (89%)                                      | H-10->LUMO (4%)                                                                                                                                    |
| 21  | 28039                      | 356             | 0.0002        | H-1->L+1 (36%), H-1->L+3 (41%)                       | H-5->L+10 (3%), H-5->L+12 (6%), H-3->L+2 (2%)                                                                                                      |
| 22  | 28412                      | 351             | 0.1784        | H-3->L+1 (33%), H-2->L+2 (41%), H-1->L+2 (15%)       |                                                                                                                                                    |
| 23  | 28425                      | 351             | 0.0037        | H-3->L+2 (34%), H-2->L+1 (51%)                       | H-1->L+3 (7%)                                                                                                                                      |
| 24  | 28806                      | 347             | 0.0245        | H-1->L+2 (83%)                                       | H-3->L+1 (4%), H-2->L+2 (9%)                                                                                                                       |
| 25  | 28956                      | 345             | 0.0001        | H-13->LUMO (16%), H-1->L+1 (54%), H-1->L+3 (21%)     | H-2->L+1 (3%)                                                                                                                                      |
| 26  | 29158                      | 342             | 0.0006        | H-13->LUMO (41%), HOMO->L+10 (10%), HOMO->L+12 (19%) | H-1->L+1 (6%), H-1->L+3 (8%), HOMO->L+7 (5%), HOMO->L+14 (5%)                                                                                      |
| 27  | 29342                      | 340             | 0.0014        | H-13->LUMO (36%), HOMO->L+10 (11%), HOMO->L+12 (22%) | H-22->L+12 (4%), HOMO->L+7 (5%), HOMO->L+14 (6%)                                                                                                   |
| 28  | 29493                      | 339             | 0.5078        | H-12->LUMO (26%), HOMO->L+3 (14%), HOMO->L+6 (15%)   | H-20->LUMO (4%), H-18->LUMO (6%), H-15->LUMO (3%), H-10->LUMO (6%), H-4->LUMO (2%), H-3->L+1 (2%), HOMO->L+5 (2%), HOMO->L+9 (6%), HOMO->L+11 (4%) |
| 29  | 30414                      | 328             | 0.0           | HOMO->L+7 (81%)                                      | HOMO->L+8 (5%), HOMO->L+10 (5%), HOMO->L+12 (4%)                                                                                                   |
| 30  | 30470                      | 328             | 0.1895        | HOMO->L+6 (79%)                                      | H-15->LUMO (2%), H-12->LUMO (5%), HOMO->L+9 (3%)                                                                                                   |
| 31  | 31171                      | 320             | 0.0           | H-3->L+2 (18%), H-2->L+1 (14%), HOMO->L+8 (48%)      | H-2->L+3 (8%), HOMO->L+7 (5%)                                                                                                                      |
| 32  | 31210                      | 320             | 0.0041        | H-5->L+3 (19%), H-3->L+1 (40%), H-2->L+2 (29%)       | H-5->L+1 (2%), H-3->L+3 (6%)                                                                                                                       |
| 33  | 31270                      | 319             | 0.0005        | H-3->L+2 (33%), H-2->L+1 (23%), HOMO->L+8 (38%)      | H-2->L+3 (2%)                                                                                                                                      |

|    |       |     |        |                                                                        |                                                                                    |
|----|-------|-----|--------|------------------------------------------------------------------------|------------------------------------------------------------------------------------|
| 34 | 31370 | 318 | 0.0288 | H-15->LUMO (12%), H-5->L+3 (21%), HOMO->L+9 (51%)                      | H-3->L+1 (4%), H-2->L+2 (3%)                                                       |
| 35 | 31437 | 318 | 0.0273 | H-15->LUMO (10%), H-5->L+3 (36%), H-3->L+1 (11%), HOMO->L+9 (19%)      | H-5->L+1 (3%), H-3->L+3 (3%), H-2->L+2 (9%)                                        |
| 36 | 31537 | 317 | 0.0002 | H-22->LUMO (15%), H-22->L+10 (13%), H-22->L+12 (28%), H-14->LUMO (10%) | H-22->L+14 (8%), H-22->L+16 (2%), HOMO->L+8 (2%), HOMO->L+10 (3%), HOMO->L+12 (5%) |
| 37 | 31685 | 315 | 0.0003 | H-14->LUMO (86%)                                                       | H-22->L+10 (2%), H-22->L+12 (5%)                                                   |
| 38 | 31910 | 313 | 0.0469 | H-15->LUMO (66%), HOMO->L+9 (13%)                                      | H-3->L+3 (5%), HOMO->L+11 (6%)                                                     |
| 39 | 31956 | 312 | 0.0001 | H-2->L+3 (75%)                                                         | H-3->L+2 (7%), H-2->L+1 (3%), HOMO->L+8 (3%), HOMO->L+12 (3%)                      |
| 40 | 32381 | 308 | 0.0003 | H-22->LUMO (36%), H-17->LUMO (48%)                                     | H-22->L+10 (2%), H-22->L+12 (4%), H-14->LUMO (3%)                                  |
| 41 | 32383 | 308 | 0.0729 | H-16->LUMO (88%)                                                       | H-3->L+3 (4%), HOMO->L+11 (2%)                                                     |
| 42 | 32489 | 307 | 0.0168 | H-3->L+3 (63%), HOMO->L+11 (14%)                                       | H-18->LUMO (4%), H-5->L+3 (4%), H-2->L+4 (3%)                                      |
| 43 | 32630 | 306 | 0.0001 | H-22->LUMO (42%), H-17->LUMO (47%)                                     | H-22->L+12 (2%)                                                                    |
| 44 | 32827 | 304 | 0.0012 | H-1->L+5 (46%), HOMO->L+10 (28%), HOMO->L+12 (18%)                     |                                                                                    |
| 45 | 32842 | 304 | 0.0012 | H-1->L+4 (97%)                                                         |                                                                                    |
| 46 | 32854 | 304 | 0.0012 | H-1->L+5 (49%), HOMO->L+10 (27%), HOMO->L+12 (16%)                     | H-2->L+3 (4%)                                                                      |
| 47 | 33255 | 300 | 0.1709 | H-20->LUMO (10%), H-18->LUMO (26%), HOMO->L+11 (25%), HOMO->L+15 (19%) | H-16->LUMO (3%), HOMO->L+13 (7%)                                                   |
| 48 | 33518 | 298 | 0.0101 | HOMO->L+13 (86%)                                                       | HOMO->L+11 (6%)                                                                    |
| 49 | 33563 | 297 | 0.0009 | HOMO->L+14 (73%)                                                       | H-4->L+1 (3%), H-3->L+4 (2%), H-2->L+5 (5%), HOMO->L+10 (5%), HOMO->L+12 (7%)      |
| 50 | 33612 | 297 | 0.0015 | H-4->L+1 (79%)                                                         | H-4->L+3 (3%), H-2->L+5 (3%), HOMO->L+14 (6%)                                      |

**Table S9.** TD DFT Calculated Electronic Transitions for 5-uduu

| No. | Energy (cm <sup>-1</sup> ) | Wavelength (nm) | Osc. Strength | Major contribs                                    | Minor contribs                                                                 |
|-----|----------------------------|-----------------|---------------|---------------------------------------------------|--------------------------------------------------------------------------------|
| 1   | 10344                      | 966             | 0.0005        | HOMO->LUMO (99%)                                  |                                                                                |
| 2   | 14751                      | 677             | 0.0046        | H-1->LUMO (93%)                                   | H-2->LUMO (3%)                                                                 |
| 3   | 17330                      | 577             | 0.0149        | H-2->LUMO (90%)                                   | H-5->LUMO (4%), H-1->LUMO (3%)                                                 |
| 4   | 18685                      | 535             | 0.0009        | H-5->LUMO (21%), H-4->LUMO (62%)                  | H-6->LUMO (9%), H-3->LUMO (4%), H-2->LUMO (2%)                                 |
| 5   | 19434                      | 514             | 0.0073        | H-3->LUMO (89%)                                   | H-4->LUMO (5%)                                                                 |
| 6   | 21193                      | 471             | 0.0104        | H-5->LUMO (55%), H-4->LUMO (10%), HOMO->L+2 (12%) | H-6->LUMO (4%), H-3->LUMO (5%), H-2->LUMO (3%), HOMO->L+1 (3%), HOMO->L+3 (4%) |
| 7   | 22652                      | 441             | 0.0241        | HOMO->L+2 (66%), HOMO->L+3 (15%)                  | H-6->LUMO (4%), H-5->LUMO (5%), HOMO->L+1 (6%)                                 |
| 8   | 22771                      | 439             | 0.0091        | H-6->LUMO (63%), H-4->LUMO (15%)                  | H-7->LUMO (7%), HOMO->L+1 (6%), HOMO->L+2 (5%)                                 |
| 9   | 22798                      | 438             | 0.0179        | HOMO->L+1 (83%)                                   | H-6->LUMO (5%), H-4->LUMO (2%), HOMO->L+2 (7%)                                 |
| 10  | 24272                      | 411             | 0.0009        | H-1->L+14 (60%)                                   | H-21->L+14 (6%), H-2->L+14 (3%), H-1->L+10 (4%), H-1->L+12 (2%)                |
| 11  | 24332                      | 410             | 0.0314        | H-7->LUMO (85%)                                   | H-6->LUMO (8%)                                                                 |
| 12  | 25483                      | 392             | 0.0098        | H-12->LUMO (15%), H-8->LUMO (59%)                 | H-11->LUMO (3%), H-10->LUMO (5%), H-9->LUMO                                    |

|    |       |     |        |                                                    |                                                                                                                                           |
|----|-------|-----|--------|----------------------------------------------------|-------------------------------------------------------------------------------------------------------------------------------------------|
| 13 | 25916 | 385 | 0.0743 | H-8->LUMO (13%), H-1->L+2 (12%), HOMO->L+3 (27%)   | (4%), HOMO->L+3 (9%)<br>H-12->LUMO (7%), H-10->LUMO (3%), H-5->L+14 (2%), H-4->L+14 (4%), H-1->L+1 (2%), H-1->L+3 (3%), H-1->L+14 (3%)    |
| 14 | 26055 | 383 | 0.0446 | H-9->LUMO (18%), H-8->LUMO (13%), H-1->L+2 (17%)   | H-5->L+14 (5%), H-4->L+14 (5%), H-1->L+1 (4%), H-1->L+3 (9%), HOMO->L+3 (9%)                                                              |
| 15 | 26228 | 381 | 0.0042 | H-9->LUMO (72%), H-1->L+2 (10%)                    | H-12->LUMO (3%), H-1->L+3 (3%)                                                                                                            |
| 16 | 26433 | 378 | 0.0064 | HOMO->L+5 (94%)                                    | HOMO->L+4 (4%)                                                                                                                            |
| 17 | 26883 | 371 | 0.0035 | H-10->LUMO (71%), HOMO->L+4 (14%)                  | H-12->LUMO (7%), H-11->LUMO (5%)                                                                                                          |
| 18 | 26942 | 371 | 0.0072 | HOMO->L+4 (77%)                                    | H-12->LUMO (6%), H-10->LUMO (8%), HOMO->L+5 (4%)                                                                                          |
| 19 | 27287 | 366 | 0.003  | H-5->L+14 (16%), H-4->L+14 (17%), H-1->L+2 (32%)   | H-13->LUMO (2%), H-6->L+14 (4%), H-2->L+14 (2%), H-1->L+1 (6%)                                                                            |
| 20 | 27564 | 362 | 0.0052 | H-12->LUMO (18%), H-11->LUMO (78%)                 |                                                                                                                                           |
| 21 | 27938 | 357 | 0.0108 | H-5->L+14 (11%), H-1->L+1 (24%)                    | H-13->LUMO (2%), H-12->L+14 (5%), H-4->L+14 (9%), H-3->L+1 (7%), H-2->L+1 (2%), H-2->L+14 (8%), H-1->L+2 (7%)                             |
| 22 | 27973 | 357 | 0.0499 | H-1->L+1 (42%), H-1->L+2 (14%)                     | H-13->LUMO (4%), H-12->L+14 (2%), H-5->L+14 (4%), H-4->L+14 (7%), H-2->L+14 (4%), H-1->L+3 (4%)                                           |
| 23 | 28192 | 354 | 0.0067 | H-2->L+1 (17%), H-2->L+2 (37%), H-1->L+3 (12%)     | H-13->LUMO (3%), H-5->L+14 (3%), H-3->L+1 (7%), H-3->L+2 (4%), H-1->L+1 (3%), H-1->L+2 (2%)                                               |
| 24 | 28370 | 352 | 0.0181 | H-13->LUMO (54%), H-3->L+1 (14%), H-2->L+1 (12%)   | H-1->L+1 (7%), H-1->L+3 (5%)                                                                                                              |
| 25 | 28406 | 352 | 0.0695 | H-13->LUMO (12%), H-3->L+1 (25%), H-2->L+2 (29%)   | H-12->LUMO (4%), H-2->L+1 (6%)                                                                                                            |
| 26 | 28677 | 348 | 0.0006 | H-13->LUMO (15%), H-1->L+3 (51%)                   | H-4->L+14 (5%), H-2->L+1 (2%), H-2->L+2 (7%), H-1->L+1 (6%)                                                                               |
| 27 | 29109 | 343 | 0.432  | H-12->LUMO (17%), HOMO->L+3 (10%), HOMO->L+6 (19%) | H-18->LUMO (3%), H-16->LUMO (2%), H-11->LUMO (3%), H-10->LUMO (2%), H-3->L+1 (6%), H-2->L+2 (6%), HOMO->L+7 (3%), HOMO->L+8 (4%)          |
| 28 | 29423 | 339 | 0.1023 | HOMO->L+6 (21%), HOMO->L+7 (54%)                   | H-12->LUMO (4%), HOMO->L+3 (2%), HOMO->L+10 (4%)                                                                                          |
| 29 | 29801 | 335 | 0.0241 | HOMO->L+6 (29%), HOMO->L+7 (34%), HOMO->L+14 (11%) | HOMO->L+9 (6%), HOMO->L+10 (4%)                                                                                                           |
| 30 | 29973 | 333 | 0.0209 | H-3->L+1 (14%), H-2->L+1 (26%), H-2->L+3 (19%)     | H-4->L+2 (3%), H-4->L+3 (3%), H-3->L+2 (3%), H-2->L+2 (3%), HOMO->L+9 (5%), HOMO->L+10 (4%), HOMO->L+14 (2%)                              |
| 31 | 30193 | 331 | 0.0169 | H-3->L+1 (16%), H-2->L+1 (28%)                     | H-5->L+2 (4%), H-5->L+3 (3%), H-4->L+2 (7%), H-4->L+3 (6%), H-2->L+2 (3%), H-2->L+3 (4%), HOMO->L+6 (2%), HOMO->L+9 (4%), HOMO->L+14 (5%) |
| 32 | 30262 | 330 | 0.0788 | HOMO->L+6 (20%), HOMO->L+14 (24%)                  | H-22->L+14 (3%), H-12->LUMO (2%), H-5->L+2 (3%), H-4->L+2 (5%), H-4->L+3 (4%), H-3->L+2 (4%), HOMO->L+7 (5%), HOMO->L+9 (6%)              |
| 33 | 30669 | 326 | 0.0012 | HOMO->L+9 (64%), HOMO->L+14 (10%)                  | H-22->L+14 (3%), H-4->L+2 (2%), H-2->L+3 (3%), HOMO->L+10 (6%), HOMO->L+12                                                                |

|    |       |     |        |                                                      |                                                                                                                                                                  |
|----|-------|-----|--------|------------------------------------------------------|------------------------------------------------------------------------------------------------------------------------------------------------------------------|
|    |       |     |        |                                                      | (2%)                                                                                                                                                             |
| 34 | 30740 | 325 | 0.0378 | H-3->L+2 (13%), H-2->L+3 (10%), HOMO->L+8 (54%)      | H-4->L+2 (4%), HOMO->L+9 (2%), HOMO->L+10 (5%)                                                                                                                   |
| 35 | 30848 | 324 | 0.0141 | H-2->L+3 (39%), HOMO->L+8 (16%)                      | H-5->L+2 (3%), H-4->L+2 (6%), H-3->L+2 (5%), H-3->L+3 (5%), H-2->L+1 (3%), H-1->L+3 (2%), HOMO->L+9 (6%)                                                         |
| 36 | 31026 | 322 | 0.0061 | H-3->L+2 (56%), HOMO->L+8 (14%)                      | H-4->L+2 (4%), H-3->L+3 (2%), H-2->L+2 (3%), HOMO->L+10 (3%)                                                                                                     |
| 37 | 31133 | 321 | 0.002  | H-14->LUMO (84%)                                     | H-17->LUMO (7%), H-15->LUMO (6%)                                                                                                                                 |
| 38 | 31466 | 317 | 0.0073 | H-22->LUMO (49%), H-15->LUMO (11%), HOMO->L+10 (10%) | H-22->L+14 (8%), H-21->LUMO (6%), H-1->L+5 (3%)                                                                                                                  |
| 39 | 31545 | 317 | 0.0015 | H-1->L+5 (92%)                                       | H-22->LUMO (2%), H-1->L+4 (3%)                                                                                                                                   |
| 40 | 31724 | 315 | 0.0206 | H-15->LUMO (63%)                                     | H-22->LUMO (7%), H-17->LUMO (6%), H-14->LUMO (7%), HOMO->L+11 (4%), HOMO->L+14 (3%)                                                                              |
| 41 | 31887 | 313 | 0.0281 | H-17->LUMO (76%)                                     | H-15->LUMO (8%), H-14->LUMO (3%), HOMO->L+11 (4%)                                                                                                                |
| 42 | 32025 | 312 | 0.0507 | HOMO->L+10 (25%), HOMO->L+11 (17%), HOMO->L+12 (11%) | H-22->LUMO (6%), H-17->LUMO (6%), H-2->L+3 (3%), HOMO->L+13 (7%), HOMO->L+14 (7%)                                                                                |
| 43 | 32156 | 310 | 0.0004 | H-1->L+4 (92%)                                       | H-1->L+5 (3%)                                                                                                                                                    |
| 44 | 32223 | 310 | 0.1512 | H-16->LUMO (59%), HOMO->L+11 (13%)                   | HOMO->L+12 (8%)                                                                                                                                                  |
| 45 | 32279 | 309 | 0.0306 | H-16->LUMO (15%), HOMO->L+11 (36%), HOMO->L+12 (15%) | H-18->LUMO (2%), H-15->LUMO (4%), H-5->L+2 (3%), H-4->L+2 (3%), H-3->L+3 (5%), HOMO->L+10 (4%)                                                                   |
| 46 | 32491 | 307 | 0.0145 | H-5->L+2 (11%), H-4->L+2 (33%), H-4->L+3 (11%)       | H-18->LUMO (8%), H-16->LUMO (7%), H-6->L+2 (3%), H-5->L+1 (5%), H-5->L+3 (6%), H-3->L+2 (3%), H-2->L+5 (3%)                                                      |
| 47 | 32597 | 306 | 0.008  | H-5->L+2 (19%), H-3->L+3 (45%)                       | H-5->L+3 (6%), H-4->L+3 (2%), HOMO->L+12 (9%), HOMO->L+13 (2%)                                                                                                   |
| 48 | 32717 | 305 | 0.0792 | H-18->LUMO (62%)                                     | H-4->L+2 (5%), H-4->L+3 (5%), HOMO->L+11 (2%), HOMO->L+13 (3%), HOMO->L+15 (6%)                                                                                  |
| 49 | 32776 | 305 | 0.0025 | HOMO->L+12 (29%), HOMO->L+13 (58%)                   | HOMO->L+11 (4%)                                                                                                                                                  |
| 50 | 32879 | 304 | 0.0197 | H-5->L+2 (16%), HOMO->L+13 (15%)                     | H-22->L+14 (5%), H-20->LUMO (3%), H-4->L+1 (6%), H-4->L+3 (3%), H-3->L+2 (3%), H-2->L+5 (6%), HOMO->L+10 (6%), HOMO->L+11 (3%), HOMO->L+12 (8%), HOMO->L+14 (3%) |

**Table S10.** TD DFT Calculated Electronic Transitions for **6**

| No. | Energy (cm <sup>-1</sup> ) | Wavelength (nm) | Osc. Strength | Major contribs                                                     | Minor contribs       |
|-----|----------------------------|-----------------|---------------|--------------------------------------------------------------------|----------------------|
| 1   | 6024                       | 1659            | 0.0108        | HOMO->LUMO (97%)                                                   |                      |
| 2   | 10067                      | 993             | 0.0054        | H-1->LUMO (91%)                                                    | H-3->LUMO (7%)       |
| 3   | 11941                      | 837             | 0.0009        | H-2->LUMO (96%)                                                    |                      |
| 4   | 13554                      | 737             | 0.0016        | H-4->LUMO (99%)                                                    |                      |
| 5   | 15994                      | 625             | 0.1935        | H-3->LUMO (80%), HOMO->L+1 (10%)                                   | H-1->LUMO (6%)       |
| 6   | 19921                      | 501             | 0.025         | H-5->LUMO (65%), HOMO->L+1 (13%), HOMO->L+2 (12%)                  | H-7->LUMO (4%)       |
| 7   | 20187                      | 495             | 0.2751        | H-5->LUMO (22%), HOMO->L+1 (42%), HOMO->L+2 (15%), HOMO->L+3 (11%) | H-3->LUMO (4%)       |
| 8   | 20919                      | 478             | 0.0664        | HOMO->L+2 (63%)                                                    | H-8->LUMO (2%), H-6- |

|    |       |     |        |                                                                     |                                                                                                                                                 |
|----|-------|-----|--------|---------------------------------------------------------------------|-------------------------------------------------------------------------------------------------------------------------------------------------|
|    |       |     |        |                                                                     | >LUMO (9%), HOMO->L+1 (9%), HOMO->L+3 (8%)                                                                                                      |
| 9  | 21643 | 462 | 0.009  | H-1->L+1 (82%)                                                      | H-6->LUMO (3%), H-3->L+1 (2%), H-2->L+1 (2%), H-1->L+2 (4%)                                                                                     |
| 10 | 21904 | 456 | 0.1376 | H-6->LUMO (64%), HOMO->L+3 (16%)                                    | H-10->LUMO (7%), H-7->LUMO (3%), H-1->L+1 (3%)                                                                                                  |
| 11 | 22064 | 453 | 0.0382 | H-8->LUMO (59%), H-7->LUMO (17%)                                    | H-9->LUMO (5%), H-6->LUMO (6%), HOMO->L+3 (9%)                                                                                                  |
| 12 | 22402 | 446 | 0.1434 | H-10->LUMO (12%), H-7->LUMO (11%), HOMO->L+3 (44%)                  | H-14->LUMO (3%), H-9->LUMO (4%), H-6->LUMO (5%), HOMO->L+1 (8%), HOMO->L+2 (2%)                                                                 |
| 13 | 22778 | 439 | 0.082  | H-10->LUMO (25%), H-7->LUMO (44%)                                   | H-8->LUMO (9%), H-6->LUMO (5%), H-5->LUMO (6%), H-2->L+1 (3%)                                                                                   |
| 14 | 23240 | 430 | 0.0113 | H-9->LUMO (88%)                                                     | H-10->LUMO (4%), H-8->LUMO (3%), H-7->LUMO (3%)                                                                                                 |
| 15 | 23261 | 429 | 0.0017 | H-11->LUMO (97%)                                                    |                                                                                                                                                 |
| 16 | 23928 | 417 | 0.006  | H-10->LUMO (28%), H-2->L+1 (31%)                                    | H-8->LUMO (9%), H-7->LUMO (3%), H-6->LUMO (2%), H-1->L+11 (7%), HOMO->L+4 (2%)                                                                  |
| 17 | 24103 | 414 | 0.0355 | H-2->L+1 (41%), HOMO->L+4 (15%)                                     | H-10->LUMO (8%), H-8->LUMO (7%), H-7->LUMO (7%), H-3->L+1 (5%), H-2->L+3 (2%)                                                                   |
| 18 | 24246 | 412 | 0.0036 | H-1->L+11 (45%)                                                     | H-15->L+11 (3%), H-3->L+11 (4%), H-2->L+1 (4%), H-2->L+11 (2%), H-1->L+5 (2%), H-1->L+12 (8%), HOMO->L+4 (8%)                                   |
| 19 | 24450 | 408 | 0.0684 | H-12->LUMO (11%), HOMO->L+4 (65%)                                   | H-10->LUMO (4%), H-8->LUMO (3%), H-1->L+11 (2%), HOMO->L+3 (2%)                                                                                 |
| 20 | 25169 | 397 | 0.0026 | H-4->L+1 (86%)                                                      | H-4->L+2 (7%)                                                                                                                                   |
| 21 | 25304 | 395 | 0.1984 | H-12->LUMO (45%), H-3->L+1 (28%)                                    | H-16->LUMO (2%), H-15->LUMO (3%), H-1->L+2 (6%), HOMO->L+4 (4%)                                                                                 |
| 22 | 25603 | 390 | 0.0431 | H-1->L+2 (75%)                                                      | H-15->LUMO (2%), H-12->LUMO (5%), H-1->L+1 (4%), H-1->L+3 (2%)                                                                                  |
| 23 | 26196 | 381 | 0.0129 | H-1->L+3 (84%)                                                      | H-4->L+11 (3%), H-1->L+2 (4%)                                                                                                                   |
| 24 | 26453 | 378 | 0.0214 | H-16->LUMO (19%), H-15->LUMO (21%), H-3->L+1 (10%), H-2->L+11 (20%) | H-18->LUMO (7%), H-2->L+12 (4%)                                                                                                                 |
| 25 | 26788 | 373 | 0.0087 | H-15->LUMO (12%), H-2->L+11 (32%)                                   | H-18->LUMO (2%), H-16->LUMO (8%), H-4->L+1 (2%), H-4->L+11 (5%), H-3->L+1 (7%), H-2->L+2 (2%), H-2->L+12 (6%)                                   |
| 26 | 27242 | 367 | 0.0632 | H-4->L+11 (35%), H-2->L+2 (15%)                                     | H-18->LUMO (3%), H-16->LUMO (4%), H-15->LUMO (2%), H-12->LUMO (3%), H-4->L+12 (6%), H-3->L+1 (3%), H-2->L+1 (3%), H-2->L+11 (4%), H-1->L+2 (2%) |
| 27 | 27450 | 364 | 0.0813 | H-12->LUMO (13%), H-3->L+1 (27%)                                    | H-15->LUMO (3%), H-14->LUMO (8%), H-4->L+11 (8%), H-3->L+2 (6%), H-2->L+1 (5%), H-2->L+3 (3%), HOMO->L+11 (2%)                                  |
| 28 | 27851 | 359 | 0.0026 | H-14->LUMO (12%), H-3->L+2 (15%), H-2->L+2 (27%), H-2->L+3 (14%)    | H-16->LUMO (5%), H-15->LUMO (4%), H-4->L+11 (8%), H-3->L+3 (5%)                                                                                 |
| 29 | 28064 | 356 | 0.0369 | H-14->LUMO (15%), H-13->LUMO (16%), H-3->L+2 (12%), H-2->L+2 (30%)  | H-16->LUMO (7%), H-4->L+11 (5%), H-3->L+3 (2%)                                                                                                  |
| 30 | 28335 | 352 | 0.0118 | H-16->LUMO (24%), H-15->LUMO (14%), H-3->L+2                        | H-18->LUMO (5%), H-14-                                                                                                                          |

|    |       |     |        |                                                      |                                                                                                                                                                  |
|----|-------|-----|--------|------------------------------------------------------|------------------------------------------------------------------------------------------------------------------------------------------------------------------|
|    |       |     |        | (22%)                                                | >LUMO (7%), H-13->LUMO (8%), H-12->LUMO (2%), H-3->L+1 (3%)                                                                                                      |
| 31 | 28716 | 348 | 0.0904 | H-13->LUMO (37%), H-3->L+2 (32%)                     | H-18->LUMO (5%), H-3->L+3 (9%), H-2->L+3 (7%)                                                                                                                    |
| 32 | 29184 | 342 | 0.14   | H-13->LUMO (14%), H-2->L+2 (11%), H-2->L+3 (45%)     | H-3->L+1 (2%), H-3->L+3 (5%), H-1->L+4 (8%)                                                                                                                      |
| 33 | 29294 | 341 | 0.0799 | H-3->L+3 (35%), H-2->L+3 (18%), H-1->L+4 (23%)       | H-5->L+1 (3%), H-3->L+4 (7%)                                                                                                                                     |
| 34 | 29646 | 337 | 0.1224 | HOMO->L+5 (84%)                                      | H-16->LUMO (2%), H-15->LUMO (3%), HOMO->L+11 (2%)                                                                                                                |
| 35 | 29708 | 336 | 0.0316 | H-3->L+3 (21%), H-1->L+4 (54%)                       | H-18->LUMO (4%), H-5->L+1 (6%), H-2->L+2 (3%)                                                                                                                    |
| 36 | 30149 | 331 | 0.0322 | H-18->LUMO (55%), H-16->LUMO (19%)                   | H-14->LUMO (5%), H-13->LUMO (4%), H-5->L+1 (6%)                                                                                                                  |
| 37 | 30320 | 329 | 0.0006 | H-4->L+2 (68%), H-4->L+3 (25%)                       | H-4->L+1 (3%)                                                                                                                                                    |
| 38 | 30817 | 324 | 0.0721 | HOMO->L+7 (59%), HOMO->L+8 (13%)                     | H-15->LUMO (2%), H-14->LUMO (3%), H-5->L+1 (5%), HOMO->L+11 (6%)                                                                                                 |
| 39 | 30914 | 323 | 0.0128 | H-4->L+3 (13%), HOMO->L+6 (60%)                      | H-14->LUMO (2%), H-4->L+2 (5%), H-3->L+4 (2%), HOMO->L+7 (6%)                                                                                                    |
| 40 | 30941 | 323 | 0.0037 | H-4->L+2 (18%), H-4->L+3 (56%), HOMO->L+6 (19%)      | H-4->L+1 (4%)                                                                                                                                                    |
| 41 | 31071 | 321 | 0.0047 | H-5->L+1 (38%), H-3->L+4 (26%)                       | H-17->LUMO (4%), H-1->L+4 (7%), HOMO->L+6 (8%), HOMO->L+11 (3%)                                                                                                  |
| 42 | 31408 | 318 | 0.0295 | H-3->L+4 (14%), HOMO->L+9 (19%), HOMO->L+11 (22%)    | H-16->L+11 (4%), H-15->L+11 (3%), H-5->L+1 (2%), H-5->L+2 (2%), HOMO->L+7 (7%), HOMO->L+8 (8%), HOMO->L+12 (4%)                                                  |
| 43 | 31541 | 317 | 0.0211 | H-17->LUMO (21%), H-3->L+4 (11%)                     | H-16->LUMO (3%), H-15->LUMO (4%), H-14->LUMO (8%), H-5->L+1 (6%), H-5->L+2 (3%), HOMO->L+6 (3%), HOMO->L+7 (8%), HOMO->L+8 (9%), HOMO->L+9 (9%)                  |
| 44 | 31674 | 315 | 0.0085 | H-17->LUMO (54%), H-3->L+4 (15%), HOMO->L+9 (21%)    | H-18->LUMO (2%)                                                                                                                                                  |
| 45 | 31748 | 314 | 0.0049 | H-3->L+4 (10%), HOMO->L+9 (17%), HOMO->L+11 (19%)    | H-18->L+11 (2%), H-17->LUMO (2%), H-16->L+11 (5%), H-15->L+11 (4%), H-6->L+1 (2%), H-5->L+1 (3%), H-2->L+4 (4%), HOMO->L+7 (3%), HOMO->L+8 (9%), HOMO->L+12 (3%) |
| 46 | 32139 | 311 | 0.1013 | H-2->L+4 (70%)                                       | H-6->L+1 (9%), HOMO->L+8 (7%)                                                                                                                                    |
| 47 | 32215 | 310 | 0.0883 | HOMO->L+8 (20%), HOMO->L+9 (21%)                     | H-17->LUMO (8%), H-15->LUMO (3%), H-14->LUMO (4%), H-7->L+1 (2%), H-6->L+1 (3%), H-5->L+1 (5%), H-5->L+2 (3%), H-2->L+4 (8%), HOMO->L+6 (2%), HOMO->L+7 (6%)     |
| 48 | 32474 | 307 | 0.0014 | H-16->L+11 (19%), H-15->L+11 (14%), HOMO->L+11 (24%) | H-18->L+11 (9%), H-16->L+12 (4%), H-15->L+12 (3%), H-6->L+1 (7%), HOMO->L+12 (3%)                                                                                |
| 49 | 32667 | 306 | 0.0409 | H-6->L+1 (61%), HOMO->L+10 (10%)                     | H-5->L+3 (2%), H-2->L+4 (8%), HOMO->L+7 (2%), HOMO->L+9 (2%), HOMO->L+11 (3%)                                                                                    |
| 50 | 32773 | 305 | 0.0013 | HOMO->L+10 (85%)                                     | H-6->L+1 (8%)                                                                                                                                                    |

**Table S11.** TD DFT Calculated Electronic Transitions for **7**

| No. | Energy (cm <sup>-1</sup> ) | Wavelength (nm) | Osc. Strength | Major contribs                                                      | Minor contribs                                                                                                                    |
|-----|----------------------------|-----------------|---------------|---------------------------------------------------------------------|-----------------------------------------------------------------------------------------------------------------------------------|
| 1   | 8527                       | 1172            | 0.0047        | HOMO->LUMO (97%)                                                    |                                                                                                                                   |
| 2   | 12896                      | 775             | 0.013         | H-1->LUMO (83%)                                                     | H-3->LUMO (8%), H-2->LUMO (6%)                                                                                                    |
| 3   | 15881                      | 629             | 0.0066        | H-4->LUMO (36%), H-2->LUMO (50%)                                    | H-3->LUMO (9%)                                                                                                                    |
| 4   | 16910                      | 591             | 0.0022        | H-5->LUMO (94%)                                                     | H-4->LUMO (3%)                                                                                                                    |
| 5   | 18142                      | 551             | 0.145         | H-4->LUMO (27%), H-3->LUMO (62%)                                    | H-5->LUMO (3%), H-2->LUMO (2%), H-1->LUMO (2%)                                                                                    |
| 6   | 18652                      | 536             | 0.3866        | H-4->LUMO (25%), H-3->LUMO (16%), H-2->LUMO (37%), H-1->LUMO (10%)  | HOMO->L+1 (4%), HOMO->L+2 (2%)                                                                                                    |
| 7   | 20300                      | 492             | 0.0905        | HOMO->L+1 (94%)                                                     |                                                                                                                                   |
| 8   | 21214                      | 471             | 0.1301        | HOMO->L+2 (89%)                                                     | H-7->LUMO (5%)                                                                                                                    |
| 9   | 22416                      | 446             | 0.0027        | H-6->LUMO (86%)                                                     | H-7->LUMO (4%), HOMO->L+3 (8%)                                                                                                    |
| 10  | 22652                      | 441             | 0.0552        | H-7->LUMO (11%), H-6->LUMO (11%), HOMO->L+3 (73%)                   | H-8->LUMO (2%)                                                                                                                    |
| 11  | 22971                      | 435             | 0.0582        | H-7->LUMO (38%), HOMO->L+3 (13%), HOMO->L+4 (37%)                   | H-8->LUMO (6%), HOMO->L+2 (2%)                                                                                                    |
| 12  | 23710                      | 421             | 0.0068        | H-8->LUMO (72%), H-7->LUMO (12%)                                    | H-11->LUMO (2%), H-1->L+1 (2%)                                                                                                    |
| 13  | 23851                      | 419             | 0.008         | H-1->L+15 (57%)                                                     | H-20->L+15 (6%), H-3->L+15 (6%), H-2->L+15 (6%), H-1->L+2 (2%)                                                                    |
| 14  | 24365                      | 410             | 0.0053        | H-9->LUMO (22%), H-1->L+1 (40%), H-1->L+2 (10%)                     | H-8->LUMO (6%), H-1->L+4 (7%), HOMO->L+5 (5%)                                                                                     |
| 15  | 24547                      | 407             | 0.077         | H-9->LUMO (32%), H-1->L+1 (13%), HOMO->L+5 (10%)                    | H-11->LUMO (9%), H-10->LUMO (8%), H-7->LUMO (3%), H-1->L+2 (8%), H-1->L+4 (4%), HOMO->L+4 (5%)                                    |
| 16  | 24650                      | 405             | 0.024         | H-11->LUMO (10%), H-9->LUMO (12%), HOMO->L+5 (50%)                  | H-7->LUMO (4%), H-1->L+1 (3%), H-1->L+2 (3%), HOMO->L+4 (7%)                                                                      |
| 17  | 24990                      | 400             | 0.0127        | H-1->L+1 (26%), H-1->L+2 (32%), HOMO->L+5 (12%)                     | H-11->LUMO (3%), H-5->L+15 (4%), H-2->L+2 (2%), H-1->L+4 (6%)                                                                     |
| 18  | 25358                      | 394             | 0.1113        | H-10->LUMO (24%), H-7->LUMO (10%), HOMO->L+4 (18%), HOMO->L+5 (12%) | H-17->LUMO (3%), H-14->LUMO (8%), H-12->LUMO (4%), H-9->LUMO (6%)                                                                 |
| 19  | 25583                      | 390             | 0.0617        | H-10->LUMO (61%)                                                    | H-11->LUMO (8%), H-9->LUMO (3%), H-7->LUMO (5%), HOMO->L+4 (8%), HOMO->L+5 (4%)                                                   |
| 20  | 25690                      | 389             | 0.0376        | H-12->LUMO (47%), H-11->LUMO (31%)                                  | H-9->LUMO (3%), HOMO->L+4 (3%), HOMO->L+5 (2%)                                                                                    |
| 21  | 25976                      | 384             | 0.055         | H-12->LUMO (35%), H-11->LUMO (13%), H-2->L+1 (13%)                  | H-13->LUMO (3%), H-9->LUMO (9%), H-3->L+1 (9%), H-1->L+1 (5%), H-1->L+2 (6%)                                                      |
| 22  | 26225                      | 381             | 0.0097        | H-13->LUMO (70%)                                                    | H-5->L+15 (8%), H-3->L+1 (2%), H-2->L+1 (3%), H-2->L+2 (4%)                                                                       |
| 23  | 26592                      | 376             | 0.0145        | H-1->L+2 (16%), H-1->L+3 (21%), H-1->L+4 (41%)                      | H-4->L+1 (4%), H-2->L+1 (3%), H-1->L+1 (3%)                                                                                       |
| 24  | 26800                      | 373             | 0.009         | HOMO->L+6 (97%)                                                     |                                                                                                                                   |
| 25  | 26953                      | 371             | 0.0096        | H-5->L+15 (50%)                                                     | H-13->LUMO (9%), H-4->L+15 (3%), H-2->L+1 (4%), H-1->L+2 (8%)                                                                     |
| 26  | 27034                      | 369             | 0.0068        | H-4->L+15 (36%)                                                     | H-20->L+15 (4%), H-14->L+15 (3%), H-13->LUMO (2%), H-11->L+15 (3%), H-5->L+15 (4%), H-3->L+15 (7%), H-2->L+1 (6%), H-2->L+15 (9%) |
| 27  | 27279                      | 366             | 0.0029        | H-11->LUMO (15%), H-2->L+1 (37%)                                    | H-13->LUMO (3%), H-12->LUMO (6%), H-9->LUMO (5%), H-4->L+2 (2%), H-4->L+15 (5%), H-3->L+1 (8%)                                    |



|    |       |     |        |                                                     |                                                                                                                                                            |
|----|-------|-----|--------|-----------------------------------------------------|------------------------------------------------------------------------------------------------------------------------------------------------------------|
| 28 | 27626 | 361 | 0.0776 | H-4->L+1 (13%), H-3->L+1 (26%), H-1->L+3 (29%)      | H-14->LUMO (5%), H-3->L+2 (4%), H-2->L+1 (3%), H-2->L+2 (4%), H-2->L+3 (4%)                                                                                |
| 29 | 27815 | 359 | 0.0121 | H-3->L+1 (11%), H-1->L+3 (41%), H-1->L+4 (28%)      | H-4->L+1 (5%), H-2->L+2 (3%)                                                                                                                               |
| 30 | 27924 | 358 | 0.0604 | H-14->LUMO (53%)                                    | H-3->L+1 (2%), H-3->L+2 (6%), H-2->L+2 (5%), HOMO->L+4 (3%), HOMO->L+7 (2%), HOMO->L+8 (7%)                                                                |
| 31 | 28228 | 354 | 0.0307 | H-3->L+3 (25%), H-2->L+2 (18%), H-2->L+3 (33%)      | H-4->L+1 (3%), H-3->L+1 (4%), H-1->L+3 (2%)                                                                                                                |
| 32 | 28604 | 349 | 0.1865 | H-3->L+1 (15%), H-2->L+3 (13%), H-1->L+5 (17%)      | H-14->LUMO (3%), H-3->L+2 (5%), H-3->L+3 (5%), H-3->L+4 (4%), H-3->L+5 (3%), H-2->L+1 (5%), H-2->L+2 (9%), H-2->L+5 (4%)                                   |
| 33 | 28766 | 347 | 0.0035 | H-5->L+2 (15%), H-5->L+4 (11%), H-1->L+5 (30%)      | H-5->L+1 (4%), H-4->L+1 (5%), H-3->L+3 (3%), H-3->L+5 (4%), H-2->L+2 (3%), H-2->L+4 (8%), H-2->L+5 (3%)                                                    |
| 34 | 28877 | 346 | 0.0323 | H-5->L+2 (25%), H-5->L+4 (17%), H-1->L+5 (12%)      | H-5->L+1 (5%), H-5->L+3 (2%), H-4->L+1 (2%), H-3->L+1 (5%), H-3->L+2 (4%), H-2->L+1 (3%), H-2->L+2 (4%), H-2->L+4 (3%)                                     |
| 35 | 29172 | 342 | 0.0604 | H-3->L+2 (28%), H-2->L+2 (24%)                      | H-5->L+15 (3%), H-4->L+1 (7%), H-4->L+2 (7%), H-3->L+1 (2%), H-2->L+1 (8%), H-2->L+4 (4%)                                                                  |
| 36 | 29437 | 339 | 0.078  | H-4->L+1 (42%), H-3->L+2 (26%)                      | H-3->L+1 (3%), H-3->L+4 (4%), H-1->L+5 (3%), HOMO->L+7 (3%)                                                                                                |
| 37 | 29570 | 338 | 0.101  | H-15->LUMO (41%), HOMO->L+7 (21%), HOMO->L+8 (10%)  | H-14->LUMO (3%), HOMO->L+15 (8%)                                                                                                                           |
| 38 | 29772 | 335 | 0.073  | H-15->LUMO (17%), HOMO->L+7 (40%), HOMO->L+8 (11%)  | H-4->L+1 (5%), H-2->L+2 (6%), H-2->L+3 (2%), H-2->L+4 (7%), H-1->L+5 (2%)                                                                                  |
| 39 | 29899 | 334 | 0.0661 | H-2->L+4 (38%)                                      | H-4->L+2 (2%), H-4->L+3 (2%), H-4->L+4 (3%), H-2->L+2 (2%), H-2->L+3 (7%), H-1->L+5 (6%), HOMO->L+7 (8%), HOMO->L+8 (6%), HOMO->L+11 (3%), HOMO->L+15 (6%) |
| 40 | 30032 | 332 | 0.0114 | H-21->LUMO (44%), H-15->LUMO (22%), HOMO->L+8 (11%) | H-16->LUMO (4%), HOMO->L+15 (4%)                                                                                                                           |
| 41 | 30049 | 332 | 0.097  | H-21->LUMO (38%), H-4->L+2 (12%), HOMO->L+15 (10%)  | H-18->LUMO (2%), H-15->LUMO (8%), H-3->L+2 (2%), HOMO->L+8 (7%), HOMO->L+9 (2%)                                                                            |
| 42 | 30082 | 332 | 0.0625 | H-4->L+2 (14%), H-3->L+3 (14%), H-3->L+4 (35%)      | H-21->LUMO (7%), H-4->L+3 (2%), H-4->L+4 (4%), H-2->L+3 (4%), H-1->L+5 (6%)                                                                                |
| 43 | 30370 | 329 | 0.0289 | H-4->L+2 (13%), HOMO->L+7 (11%), HOMO->L+15 (30%)   | H-21->L+15 (6%), H-16->LUMO (7%), H-5->L+1 (4%), H-4->L+4 (2%), H-2->L+4 (2%), HOMO->L+9 (3%), HOMO->L+10 (5%)                                             |
| 44 | 30501 | 327 | 0.0057 | H-5->L+1 (62%), H-5->L+2 (17%)                      | H-16->LUMO (3%), HOMO->L+9 (4%)                                                                                                                            |
| 45 | 30624 | 326 | 0.018  | H-16->LUMO (71%), HOMO->L+9 (10%)                   | H-4->L+2 (3%), HOMO->L+8 (2%)                                                                                                                              |
| 46 | 30661 | 326 | 0.0091 | H-4->L+2 (18%), H-2->L+5 (16%), HOMO->L+9 (15%)     | H-5->L+1 (6%), H-5->L+2 (3%), H-3->L+4 (3%), H-3->L+5 (8%), H-1->L+5 (7%), HOMO->L+8 (5%)                                                                  |
| 47 | 30720 | 325 | 0.0084 | H-3->L+3 (27%), H-2->L+3 (17%)                      | H-4->L+2 (5%), H-3->L+4 (5%), H-3->L+5 (5%), H-2->L+4 (6%), H-2->L+5 (6%), H-1->L+5 (4%), HOMO->L+8 (3%), HOMO->L+9 (6%),                                  |

|    |       |     |        |                                                    |                                                                                                                                               |
|----|-------|-----|--------|----------------------------------------------------|-----------------------------------------------------------------------------------------------------------------------------------------------|
| 48 | 30890 | 323 | 0.0583 | H-3->L+5 (11%), H-2->L+5 (14%), HOMO->L+9 (25%)    | HOMO->L+10 (2%)<br>H-16->LUMO (5%), H-4->L+3 (3%), H-3->L+3 (7%), H-3->L+4 (5%), H-2->L+3 (4%), H-2->L+4 (5%), H-1->L+5 (3%), HOMO->L+10 (4%) |
| 49 | 31044 | 322 | 0.1284 | HOMO->L+8 (13%), HOMO->L+9 (22%), HOMO->L+10 (24%) | H-21->L+15 (3%), H-3->L+4 (7%), H-2->L+4 (2%), HOMO->L+14 (2%), HOMO->L+15 (7%)                                                               |
| 50 | 31414 | 318 | 0.0276 | H-4->L+3 (39%), H-4->L+4 (15%)                     | H-20->LUMO (9%), H-3->L+2 (2%), H-3->L+4 (9%), H-2->L+4 (6%)                                                                                  |

**Table S12.** TD DFT Calculated Electronic Transitions for **8a**

| No. | Energy (cm <sup>-1</sup> ) | Wavelength (nm) | Osc. Strength | Major contribs                                                      | Minor contribs                                                                                            |
|-----|----------------------------|-----------------|---------------|---------------------------------------------------------------------|-----------------------------------------------------------------------------------------------------------|
| 1   | 7131                       | 1402            | 0.0           | HOMO->LUMO (98%)                                                    |                                                                                                           |
| 2   | 11451                      | 873             | 0.0383        | H-2->LUMO (31%), H-1->LUMO (64%)                                    | H-3->LUMO (3%)                                                                                            |
| 3   | 13442                      | 743             | 0.0053        | H-3->LUMO (82%), H-2->LUMO (13%)                                    |                                                                                                           |
| 4   | 15108                      | 661             | 0.0044        | H-5->LUMO (99%)                                                     |                                                                                                           |
| 5   | 15838                      | 631             | 0.872         | H-2->LUMO (52%), H-1->LUMO (31%)                                    | H-3->LUMO (9%), HOMO->L+1 (5%)                                                                            |
| 6   | 18747                      | 533             | 0.0           | H-4->LUMO (88%)                                                     | H-1->L+1 (3%), HOMO->L+2 (2%)                                                                             |
| 7   | 19601                      | 510             | 0.3794        | HOMO->L+1 (75%)                                                     | H-7->LUMO (5%), H-3->LUMO (2%), HOMO->L+3 (7%), HOMO->L+5 (6%)                                            |
| 8   | 20126                      | 496             | 0.0           | HOMO->L+2 (87%)                                                     | H-6->LUMO (9%)                                                                                            |
| 9   | 20513                      | 487             | 0.0624        | HOMO->L+3 (83%)                                                     | H-7->LUMO (8%), HOMO->L+5 (5%)                                                                            |
| 10  | 20671                      | 483             | 0.0           | H-6->LUMO (80%)                                                     | HOMO->L+2 (9%), HOMO->L+4 (5%)                                                                            |
| 11  | 21327                      | 468             | 0.0           | H-1->L+1 (13%), HOMO->L+4 (80%)                                     | H-6->LUMO (4%)                                                                                            |
| 12  | 21791                      | 458             | 0.0           | H-2->L+1 (11%), H-1->L+1 (57%), HOMO->L+4 (12%)                     | H-4->LUMO (3%), H-3->L+1 (3%), H-3->L+3 (2%), H-1->L+3 (4%)                                               |
| 13  | 22108                      | 452             | 0.3667        | H-7->LUMO (24%), HOMO->L+5 (67%)                                    | H-9->LUMO (3%)                                                                                            |
| 14  | 23444                      | 426             | 0.0           | H-8->LUMO (92%)                                                     | H-13->LUMO (3%)                                                                                           |
| 15  | 23528                      | 425             | 0.0           | H-2->L+16 (14%), H-1->L+3 (15%), H-1->L+16 (18%)                    | H-2->L+1 (4%), H-2->L+3 (3%), H-2->L+9 (5%), H-2->L+17 (3%), H-1->L+1 (5%), H-1->L+9 (6%), H-1->L+17 (4%) |
| 16  | 23546                      | 424             | 0.198         | H-11->LUMO (22%), H-9->LUMO (24%), H-7->LUMO (26%), HOMO->L+5 (10%) | HOMO->L+1 (4%), HOMO->L+3 (3%), HOMO->L+6 (4%)                                                            |
| 17  | 23906                      | 418             | 0.126         | H-9->LUMO (46%), H-7->LUMO (27%)                                    | H-15->LUMO (3%), H-11->LUMO (3%), H-1->L+4 (2%), HOMO->L+1 (4%), HOMO->L+3 (3%), HOMO->L+5 (2%)           |
| 18  | 24207                      | 413             | 0.0           | H-10->LUMO (12%), H-3->L+1 (33%), H-2->L+1 (15%), HOMO->L+7 (12%)   | H-13->LUMO (9%), H-6->LUMO (2%), H-5->L+16 (3%)                                                           |
| 19  | 24232                      | 412             | 0.0           | H-3->L+1 (25%), H-1->L+3 (11%), HOMO->L+7 (26%)                     | H-13->LUMO (4%), H-2->L+1 (7%), H-2->L+16 (2%), H-1->L+1 (6%), H-1->L+16 (3%)                             |
| 20  | 24237                      | 412             | 0.0055        | H-11->LUMO (20%), H-1->L+2 (62%), HOMO->L+6 (11%)                   |                                                                                                           |
| 21  | 24512                      | 407             | 0.1242        | H-1->L+2 (14%), HOMO->L+6 (76%)                                     |                                                                                                           |
| 22  | 24533                      | 407             | 0.0           | H-13->LUMO (25%), H-10->LUMO (32%), H-3->L+1 (12%), HOMO->L+7 (16%) | H-1->L+1 (3%), H-1->L+3 (2%)                                                                              |
| 23  | 24611                      | 406             | 0.0           | H-13->LUMO (15%), H-1->L+3 (19%), HOMO->L+7 (34%)                   | H-3->L+1 (5%), H-2->L+1 (4%), H-2->L+16 (2%), H-1->L+16 (3%)                                              |
| 24  | 24797                      | 403             | 0.0076        | H-12->LUMO (96%)                                                    |                                                                                                           |
| 25  | 24838                      | 402             | 0.0           | H-14->LUMO (48%), H-13->LUMO (18%), H-10->LUMO (28%)                |                                                                                                           |
| 26  | 25288                      | 395             | 0.0           | H-2->L+1 (42%), H-1->L+3 (23%)                                      | H-14->LUMO (7%), H-10->LUMO (6%), H-3->L+1 (4%), H-1->L+1 (3%), HOMO->L+7 (5%)                            |

|    |       |     |        |                                                      |                                                                                                                                          |
|----|-------|-----|--------|------------------------------------------------------|------------------------------------------------------------------------------------------------------------------------------------------|
| 27 | 25341 | 394 | 0.0624 | H-11->LUMO (40%), H-9->LUMO (20%), H-1->L+2 (15%)    | H-18->LUMO (3%), H-4->L+1 (2%), H-2->L+2 (7%), HOMO->L+6 (3%)                                                                            |
| 28 | 25383 | 393 | 0.0    | H-14->LUMO (24%), H-5->L+1 (12%), H-1->L+5 (16%)     | H-13->LUMO (8%), H-10->LUMO (7%), H-5->L+3 (3%), H-2->L+1 (4%), H-2->L+3 (5%), H-1->L+3 (9%)                                             |
| 29 | 25529 | 391 | 0.0    | H-5->L+1 (60%), H-5->L+3 (11%)                       | H-14->LUMO (8%), H-13->LUMO (2%), H-10->LUMO (4%)                                                                                        |
| 30 | 25660 | 389 | 0.0788 | H-1->L+4 (84%)                                       | H-3->L+2 (3%), H-2->L+4 (6%)                                                                                                             |
| 31 | 25877 | 386 | 0.0    | H-1->L+5 (58%)                                       | H-14->LUMO (8%), H-13->LUMO (7%), H-10->LUMO (6%), H-5->L+16 (2%), H-2->L+5 (5%), H-1->L+3 (3%)                                          |
| 32 | 26457 | 377 | 0.0    | H-5->L+16 (15%), H-3->L+16 (22%)                     | H-5->L+9 (5%), H-5->L+17 (4%), H-3->L+3 (5%), H-3->L+9 (6%), H-3->L+15 (2%), H-3->L+17 (8%), H-2->L+3 (3%), H-1->L+5 (8%)                |
| 33 | 26593 | 376 | 0.0676 | H-15->LUMO (69%)                                     | H-20->LUMO (3%), H-18->LUMO (6%), H-11->LUMO (3%), H-2->L+2 (2%), HOMO->L+9 (4%)                                                         |
| 34 | 26692 | 374 | 0.0    | H-3->L+16 (14%), H-2->L+3 (27%)                      | H-5->L+1 (5%), H-5->L+9 (2%), H-5->L+16 (9%), H-5->L+17 (2%), H-3->L+1 (2%), H-3->L+9 (3%), H-3->L+17 (5%), H-2->L+1 (4%), H-1->L+3 (3%) |
| 35 | 26759 | 373 | 0.0736 | H-2->L+2 (79%)                                       | H-11->LUMO (7%), H-3->L+2 (4%)                                                                                                           |
| 36 | 27276 | 366 | 0.0    | H-5->L+16 (13%), H-2->L+3 (45%)                      | H-5->L+9 (4%), H-5->L+17 (3%), H-3->L+1 (3%), H-3->L+3 (4%), H-3->L+5 (2%), H-3->L+16 (3%), H-3->L+17 (2%), H-2->L+5 (2%)                |
| 37 | 27332 | 365 | 0.0872 | H-4->L+1 (10%), H-3->L+2 (56%), H-2->L+4 (20%)       | H-2->L+2 (3%)                                                                                                                            |
| 38 | 27997 | 357 | 0.0096 | H-4->L+1 (57%), H-3->L+2 (13%), H-3->L+4 (16%)       | H-18->LUMO (3%), H-2->L+2 (2%)                                                                                                           |
| 39 | 28082 | 356 | 0.0    | H-3->L+3 (48%), H-3->L+5 (21%), H-2->L+5 (10%)       | H-5->L+16 (4%)                                                                                                                           |
| 40 | 28139 | 355 | 0.1397 | H-3->L+2 (11%), H-2->L+4 (30%), H-1->L+7 (40%)       | H-4->L+6 (4%), H-3->L+4 (2%), H-2->L+7 (2%), H-1->L+4 (2%)                                                                               |
| 41 | 28155 | 355 | 0.0    | H-3->L+3 (12%), H-2->L+5 (22%), H-1->L+6 (50%)       | H-4->L+7 (5%), H-2->L+6 (2%)                                                                                                             |
| 42 | 28352 | 352 | 0.0344 | H-20->LUMO (20%), H-18->LUMO (33%), H-17->LUMO (19%) | H-15->LUMO (4%), H-3->L+2 (3%), H-2->L+4 (4%), H-1->L+7 (4%), HOMO->L+9 (6%)                                                             |
| 43 | 28601 | 349 | 0.4403 | H-3->L+4 (61%), H-1->L+7 (13%)                       | H-4->L+1 (8%), H-3->L+2 (2%), H-2->L+4 (3%)                                                                                              |
| 44 | 28650 | 349 | 0.1944 | H-3->L+4 (12%), H-2->L+4 (28%), H-1->L+7 (27%)       | H-20->LUMO (2%), H-18->LUMO (2%), H-17->LUMO (3%), H-15->LUMO (2%), H-4->L+1 (7%), H-3->L+2 (2%)                                         |
| 45 | 28673 | 348 | 0.0    | H-2->L+5 (42%), H-1->L+6 (33%)                       | H-3->L+3 (7%), H-1->L+5 (3%)                                                                                                             |
| 46 | 29078 | 343 | 0.0    | H-3->L+5 (57%)                                       | H-4->L+2 (4%), H-3->L+1 (2%), H-3->L+3 (8%), H-2->L+3 (5%), H-2->L+5 (4%), HOMO->L+8 (3%), HOMO->L+10 (3%)                               |
| 47 | 29461 | 339 | 0.0072 | H-20->LUMO (29%), H-19->LUMO (21%), H-17->LUMO (41%) |                                                                                                                                          |
| 48 | 29507 | 338 | 0.0    | HOMO->L+8 (85%)                                      | H-4->L+2 (4%)                                                                                                                            |
| 49 | 29700 | 336 | 0.0    | H-5->L+3 (70%)                                       | H-5->L+1 (9%), H-5->L+5 (9%), H-5->L+16 (3%), H-5->L+17 (4%)                                                                             |
| 50 | 29794 | 335 | 0.2712 | H-4->L+3 (17%), HOMO->L+9 (46%)                      | H-18->LUMO (2%), H-15->LUMO (4%), H-6->L+1 (4%), H-4->L+1 (3%), HOMO->L+11 (4%), HOMO->L+16 (7%), HOMO->L+17 (2%)                        |

**Table S13.** TD DFT Calculated Electronic Transitions for **8b**

| No. | Energy (cm <sup>-1</sup> ) | Wavelength (nm) | Osc. Strength | Major contribs                                                                       | Minor contribs                                                                                                                 |
|-----|----------------------------|-----------------|---------------|--------------------------------------------------------------------------------------|--------------------------------------------------------------------------------------------------------------------------------|
| 1   | 6819                       | 1466            | 0.0001        | HOMO->LUMO (98%)                                                                     |                                                                                                                                |
| 2   | 11087                      | 901             | 0.0295        | H-2->LUMO (24%), H-1->LUMO (71%)                                                     | H-3->LUMO (3%)                                                                                                                 |
| 3   | 13291                      | 752             | 0.0132        | H-3->LUMO (69%), H-2->LUMO (25%)                                                     |                                                                                                                                |
| 4   | 15109                      | 661             | 0.0017        | H-5->LUMO (96%)                                                                      | H-4->LUMO (3%)                                                                                                                 |
| 5   | 16017                      | 624             | 0.9421        | H-3->LUMO (22%), H-2->LUMO (48%), H-1->LUMO (24%)                                    | HOMO->L+1 (3%)                                                                                                                 |
| 6   | 18606                      | 537             | 0.0039        | H-4->LUMO (85%)                                                                      | H-6->LUMO (3%), H-5->LUMO (3%), H-1->L+1 (2%)                                                                                  |
| 7   | 19329                      | 517             | 0.2225        | HOMO->L+1 (80%)                                                                      | H-7->LUMO (5%), H-3->LUMO (2%), HOMO->L+3 (2%), HOMO->L+5 (7%)                                                                 |
| 8   | 19971                      | 500             | 0.0009        | HOMO->L+2 (93%)                                                                      | H-6->LUMO (5%)                                                                                                                 |
| 9   | 20421                      | 489             | 0.0893        | HOMO->L+3 (89%)                                                                      | H-7->LUMO (6%), HOMO->L+5 (3%)                                                                                                 |
| 10  | 20556                      | 486             | 0.0014        | H-6->LUMO (76%), HOMO->L+4 (14%)                                                     | HOMO->L+2 (5%)                                                                                                                 |
| 11  | 21130                      | 473             | 0.0022        | H-6->LUMO (10%), HOMO->L+4 (76%)                                                     | H-1->L+1 (9%)                                                                                                                  |
| 12  | 21775                      | 459             | 0.0015        | H-1->L+1 (66%)                                                                       | H-4->LUMO (3%), H-3->L+1 (3%), H-3->L+3 (2%), H-2->L+1 (7%), H-1->L+3 (5%), H-1->L+5 (2%), HOMO->L+4 (6%)                      |
| 13  | 21958                      | 455             | 0.3582        | H-7->LUMO (36%), HOMO->L+5 (57%)                                                     | H-9->LUMO (3%)                                                                                                                 |
| 14  | 23240                      | 430             | 0.0001        | H-8->LUMO (96%)                                                                      |                                                                                                                                |
| 15  | 23346                      | 428             | 0.1173        | H-13->LUMO (14%), H-9->LUMO (44%), H-7->LUMO (13%), HOMO->L+5 (13%)                  | HOMO->L+6 (5%)                                                                                                                 |
| 16  | 23806                      | 420             | 0.1366        | H-9->LUMO (35%), H-7->LUMO (29%)                                                     | H-18->LUMO (2%), H-15->LUMO (5%), H-1->L+2 (4%), H-1->L+4 (2%), HOMO->L+1 (4%), HOMO->L+3 (3%), HOMO->L+5 (7%), HOMO->L+6 (3%) |
| 17  | 23949                      | 417             | 0.0001        | H-2->L+1 (26%), H-1->L+3 (19%), HOMO->L+7 (35%)                                      | H-10->LUMO (4%), H-1->L+1 (6%)                                                                                                 |
| 18  | 24161                      | 413             | 0.0142        | H-13->LUMO (12%), H-1->L+2 (55%), HOMO->L+6 (19%)                                    | H-1->L+16 (4%)                                                                                                                 |
| 19  | 24278                      | 411             | 0.0562        | H-2->L+16 (11%), H-1->L+16 (22%), HOMO->L+6 (49%)                                    | H-18->L+16 (2%), H-1->L+2 (4%)                                                                                                 |
| 20  | 24365                      | 410             | 0.0001        | H-1->L+3 (19%), HOMO->L+7 (56%)                                                      | H-10->LUMO (7%), H-2->L+1 (3%), H-1->L+1 (4%)                                                                                  |
| 21  | 24416                      | 409             | 0.0004        | H-14->LUMO (24%), H-10->LUMO (21%), H-3->L+1 (22%), H-1->L+3 (21%)                   | H-2->L+1 (2%), H-1->L+1 (2%)                                                                                                   |
| 22  | 24488                      | 408             | 0.0729        | H-2->L+16 (12%), H-1->L+2 (23%), H-1->L+16 (22%), HOMO->L+6 (15%)                    | H-18->L+16 (2%), H-11->LUMO (8%), HOMO->L+5 (2%)                                                                               |
| 23  | 24642                      | 405             | 0.0245        | H-11->LUMO (84%)                                                                     | H-13->LUMO (3%), HOMO->L+6 (3%)                                                                                                |
| 24  | 24645                      | 405             | 0.0011        | H-12->LUMO (64%), H-10->LUMO (28%)                                                   | H-3->L+1 (5%)                                                                                                                  |
| 25  | 24767                      | 403             | 0.0           | H-14->LUMO (14%), H-12->LUMO (21%), H-10->LUMO (10%), H-3->L+1 (31%), H-2->L+1 (11%) | H-3->L+5 (2%), H-1->L+5 (3%)                                                                                                   |
| 26  | 25279                      | 395             | 0.0049        | H-14->LUMO (25%), H-2->L+1 (10%), H-1->L+3 (11%), H-1->L+5 (30%)                     | H-12->LUMO (4%), H-10->LUMO (5%), H-2->L+3 (5%)                                                                                |
| 27  | 25303                      | 395             | 0.0027        | H-13->LUMO (22%), H-1->L+4 (45%)                                                     | H-9->LUMO (7%), H-4->L+1 (2%), H-2->L+2 (9%), H-1->L+2 (6%)                                                                    |
| 28  | 25443                      | 393             | 0.01          | H-14->LUMO (12%), H-10->LUMO (12%), H-3->L+1 (16%), H-2->L+1 (30%), H-1->L+3 (11%)   | H-12->LUMO (3%), H-2->L+3 (4%), H-1->L+1 (2%), HOMO->L+7 (2%)                                                                  |
| 29  | 25519                      | 391             | 0.1137        | H-13->LUMO (28%), H-1->L+4 (41%)                                                     | H-9->LUMO (3%), H-2->L+2 (4%), H-2->L+4 (5%), H-1->L+2 (4%), HOMO->L+5 (2%)                                                    |
| 30  | 25746                      | 388             | 0.0015        | H-14->LUMO (13%), H-1->L+5 (54%)                                                     | H-12->LUMO (3%), H-10->LUMO (9%), H-3->L+1 (5%), H-2->L+5 (5%), H-1->L+3 (4%)                                                  |
| 31  | 25864                      | 386             | 0.0031        | H-5->L+1 (71%), H-5->L+3 (14%)                                                       | H-5->L+5 (4%), H-3->L+16 (3%)                                                                                                  |
| 32  | 26615                      | 375             | 0.0381        | H-13->LUMO (11%), H-2->L+2 (75%)                                                     | H-3->L+2 (3%)                                                                                                                  |
| 33  | 26767                      | 373             | 0.0001        | H-5->L+16 (13%), H-2->L+3 (56%)                                                      | H-14->LUMO (7%), H-3->L+5 (2%), H-2->L+1 (3%), H-1->L+3 (4%)                                                                   |
| 34  | 27113                      | 368             | 0.1026        | H-3->L+2 (26%), H-3->L+16 (32%), H-2->L+4                                            | H-19->L+16 (3%), H-15->LUMO                                                                                                    |

|    |       |     |        |                                                                   |                                                                              |
|----|-------|-----|--------|-------------------------------------------------------------------|------------------------------------------------------------------------------|
|    |       |     |        | (10%)                                                             | (3%), H-15->L+16 (2%), H-4->L+1 (3%), H-3->L+4 (2%), H-2->L+16 (2%)          |
| 35 | 27285 | 366 | 0.0935 | H-15->LUMO (48%), H-3->L+16 (20%)                                 | H-3->L+2 (7%), H-2->L+4 (2%), HOMO->L+9 (4%)                                 |
| 36 | 27410 | 364 | 0.0018 | H-15->LUMO (21%), H-3->L+2 (19%), H-3->L+16 (14%), H-2->L+4 (16%) | H-4->L+1 (6%), H-1->L+7 (3%), HOMO->L+9 (2%)                                 |
| 37 | 27604 | 362 | 0.0002 | H-5->L+16 (37%), H-3->L+3 (14%), H-2->L+3 (14%)                   | H-3->L+1 (2%), H-2->L+5 (9%), H-1->L+6 (9%)                                  |
| 38 | 28014 | 356 | 0.1363 | H-4->L+1 (30%), H-3->L+2 (26%), H-3->L+4 (23%)                    | H-2->L+2 (2%), H-2->L+4 (7%)                                                 |
| 39 | 28046 | 356 | 0.1194 | H-4->L+1 (19%), H-2->L+4 (17%), H-1->L+7 (39%)                    | H-4->L+6 (4%), H-3->L+2 (6%), H-3->L+4 (3%), H-2->L+7 (3%)                   |
| 40 | 28070 | 356 | 0.0079 | H-3->L+3 (15%), H-2->L+5 (13%), H-1->L+6 (50%)                    | H-5->L+16 (5%), H-4->L+7 (5%), H-2->L+6 (3%)                                 |
| 41 | 28201 | 354 | 0.0006 | H-20->LUMO (41%), H-5->L+16 (12%), H-3->L+3 (21%)                 | H-16->LUMO (6%), H-3->L+5 (9%)                                               |
| 42 | 28348 | 352 | 0.0    | H-20->LUMO (39%), H-3->L+3 (11%), H-3->L+5 (23%)                  | H-16->LUMO (3%), H-5->L+16 (7%), H-2->L+5 (7%)                               |
| 43 | 28402 | 352 | 0.1653 | H-4->L+1 (15%), H-2->L+4 (28%), H-1->L+7 (38%)                    | H-3->L+2 (3%), H-3->L+4 (4%)                                                 |
| 44 | 28627 | 349 | 0.0103 | H-2->L+5 (48%), H-1->L+6 (25%)                                    | H-20->LUMO (4%), H-3->L+3 (5%), H-1->L+5 (3%), HOMO->L+8 (2%)                |
| 45 | 28723 | 348 | 0.3342 | H-4->L+1 (11%), H-3->L+4 (60%)                                    | H-3->L+2 (6%), H-2->L+4 (3%), H-1->L+7 (4%)                                  |
| 46 | 28949 | 345 | 0.0025 | HOMO->L+8 (79%)                                                   | H-20->LUMO (3%), H-3->L+3 (3%), H-3->L+5 (6%)                                |
| 47 | 29016 | 344 | 0.0028 | H-3->L+3 (14%), H-3->L+5 (44%), HOMO->L+8 (11%)                   | H-20->LUMO (3%), H-5->L+16 (4%), H-4->L+2 (3%), H-3->L+1 (4%), H-2->L+3 (7%) |
| 48 | 29415 | 339 | 0.0028 | H-19->LUMO (31%), H-18->LUMO (14%), H-17->LUMO (45%)              |                                                                              |
| 49 | 29761 | 336 | 0.0023 | H-5->L+3 (57%), H-5->L+5 (10%), H-4->L+3 (17%)                    | H-5->L+1 (9%)                                                                |
| 50 | 29790 | 335 | 0.0018 | H-4->L+2 (80%)                                                    | H-3->L+3 (4%)                                                                |

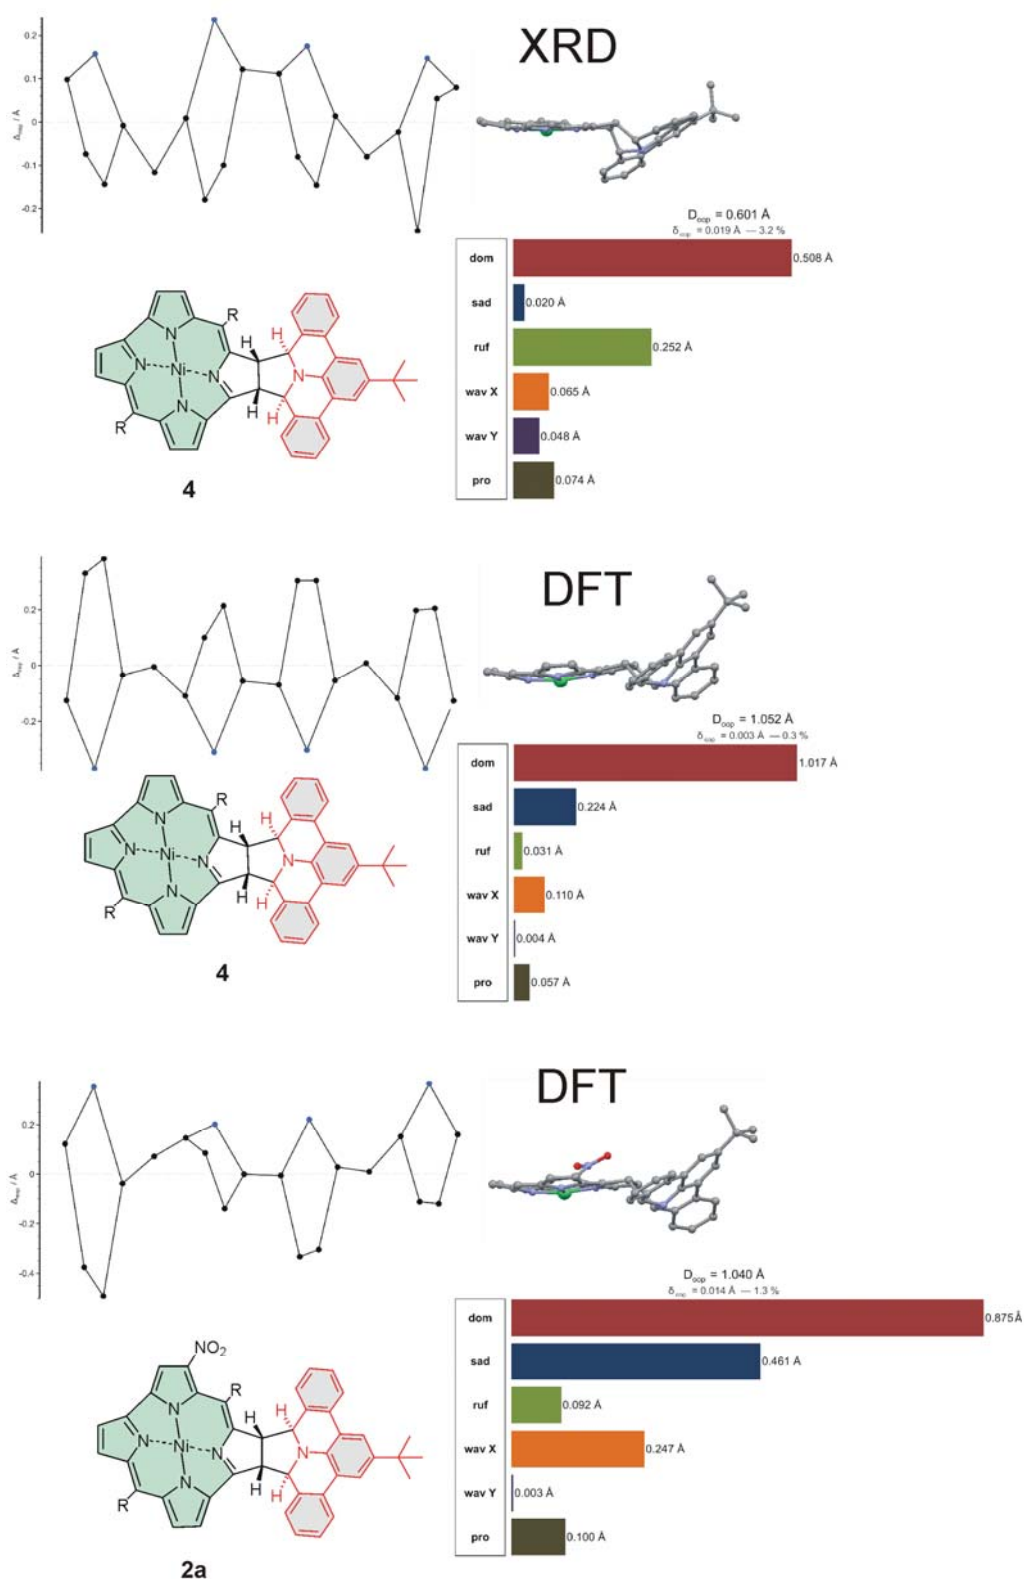

**Figure S136.** Out-of-plane displacement for norcorrolatonickel(II) moiety in **2a** and **4**. Color code: brown, doming (*dom*); dark blue, saddling (*sad*); green, ruffling (*ruf*); orange, waving x (*wav X*); purple, waving y (*wav Y*); olive, propellering (*pro*).  $D_{oop}$ , the total out-of-plane distortion;  $\delta_{oop}$ , difference between  $D_{oop}$  calculated by *PorphyrStruct*<sup>[11]</sup> and estimated by of the normal-coordinate structure decomposition (NSD) simulation.<sup>[12,13]</sup>

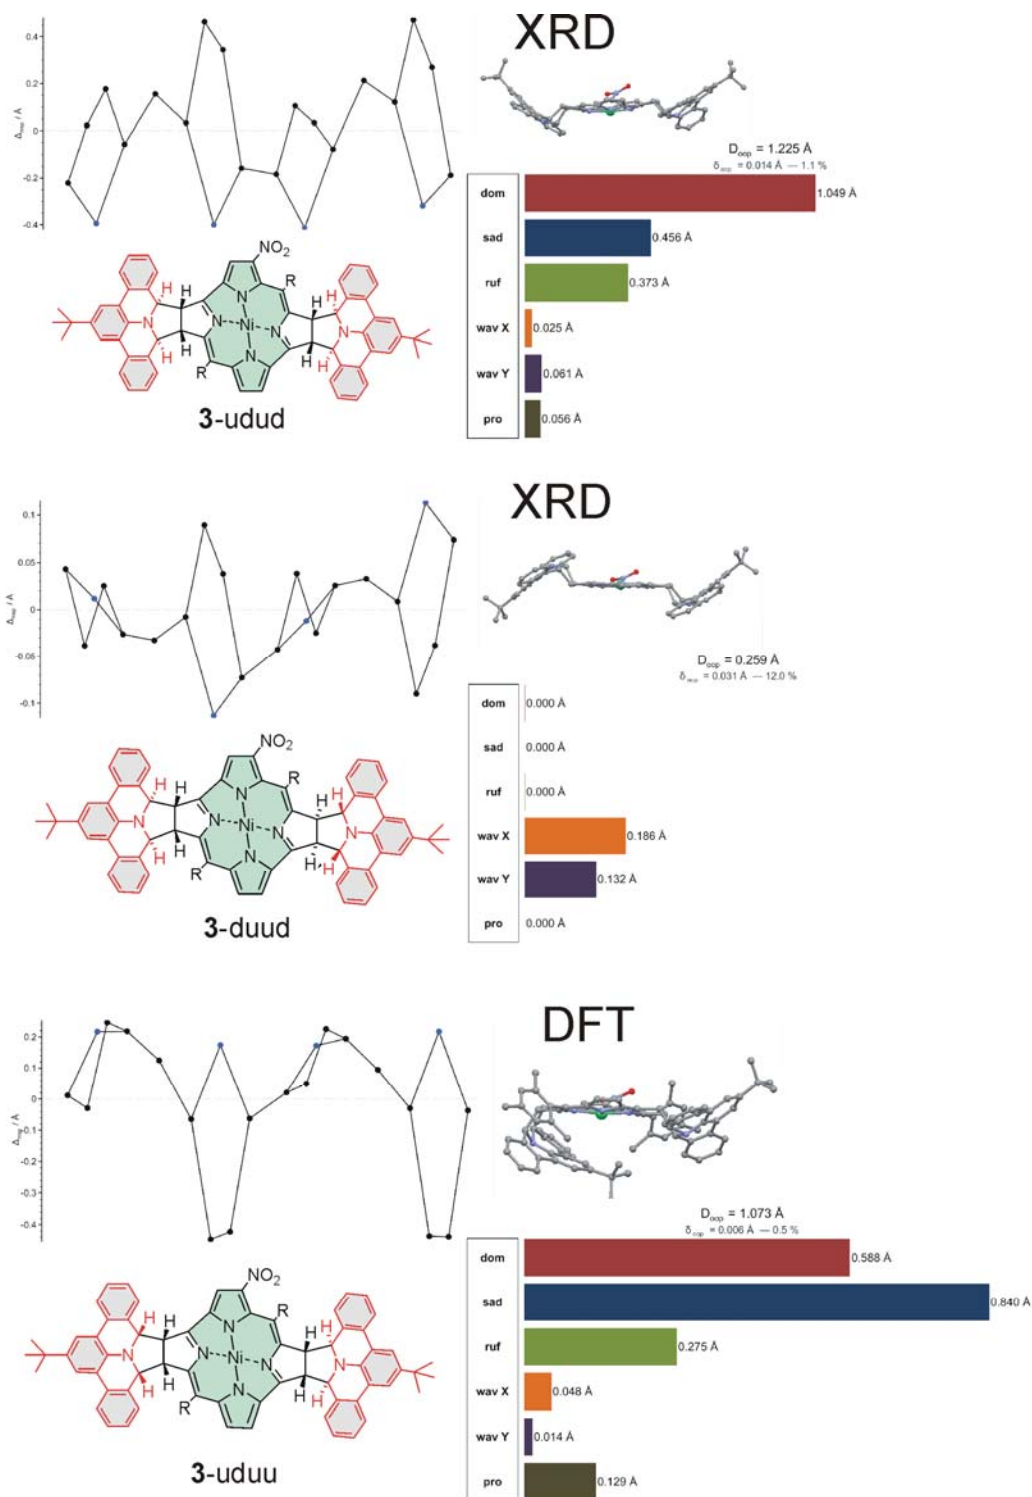

**Figure S137.** Out-of-plane displacement for norcorrolatonickel(II) moiety in the stereoisomers of **3**. Color code: brown, doming (*dom*); dark blue, saddling (*sad*); green, ruffling (*ruf*); orange, waving x (wav X); purple, waving y (wav Y); olive, propellering (*pro*).  $D_{oop}$ , the total out-of-plane distortion;  $\delta_{oop}$ , difference between  $D_{oop}$  calculated by *PorphyStruct*<sup>[11]</sup> and estimated by of the normal-coordinate structure decomposition (NSD) simulation.<sup>[12,13]</sup>

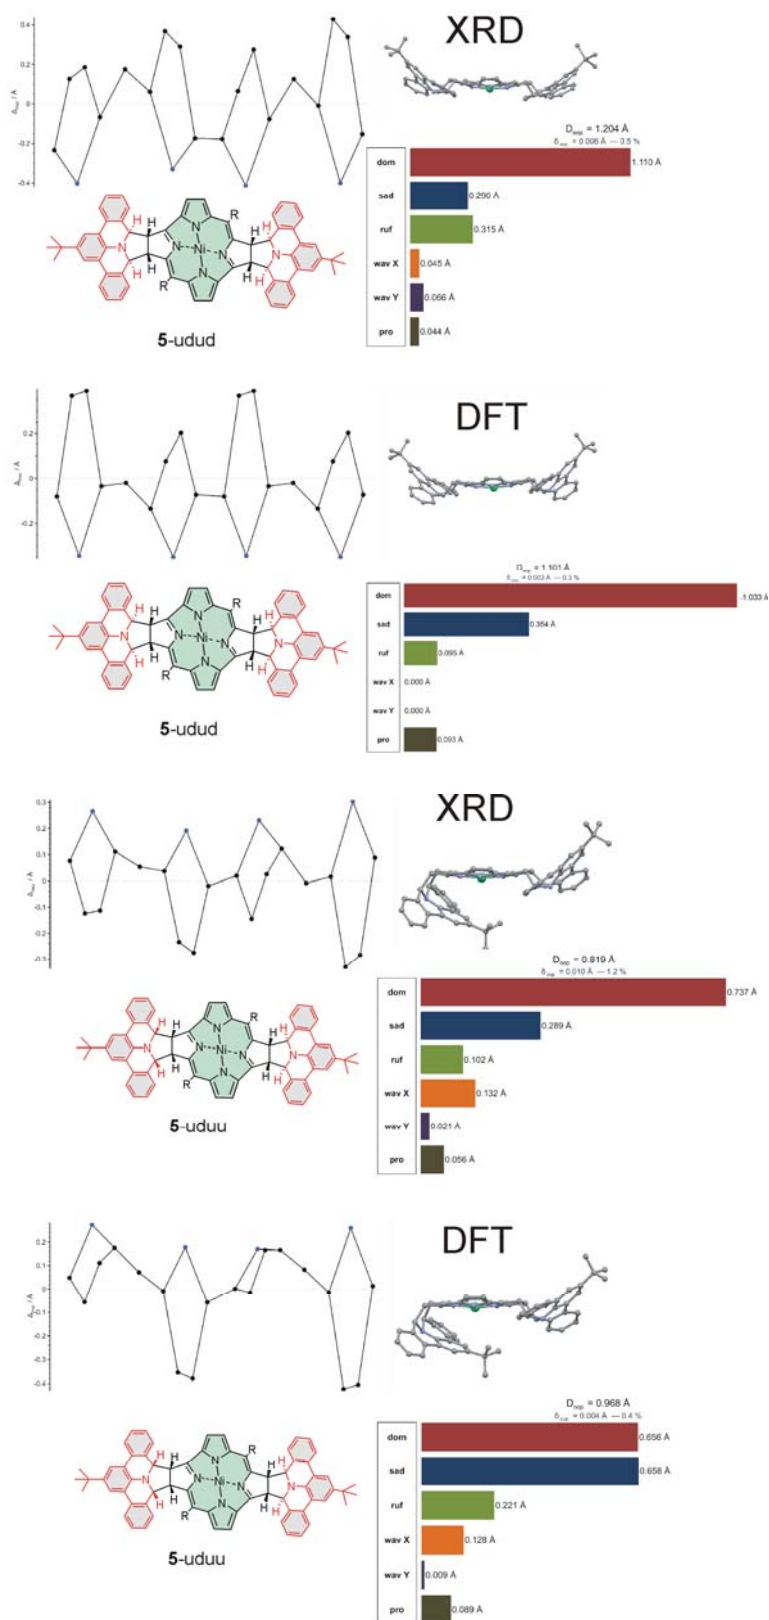

**Figure S138.** Out-of-plane displacement for norcorrolatonickel(II) moiety in the stereoisomers of **5**. Color code: brown, doming (*dom*); dark blue, saddling (*sad*); green, ruffling (*ruf*); orange, waving *x* (*wav X*); purple, waving *y* (*wav Y*); olive, propellering (*pro*).  $D_{oop}$ , the total out-of-plane distortion;  $\delta_{oop}$ , difference between  $D_{oop}$  calculated by *PorphyrStruct*<sup>[11]</sup> and estimated by of the normal-coordinate structure decomposition (NSD) simulation.<sup>[12,13]</sup>



# XRD

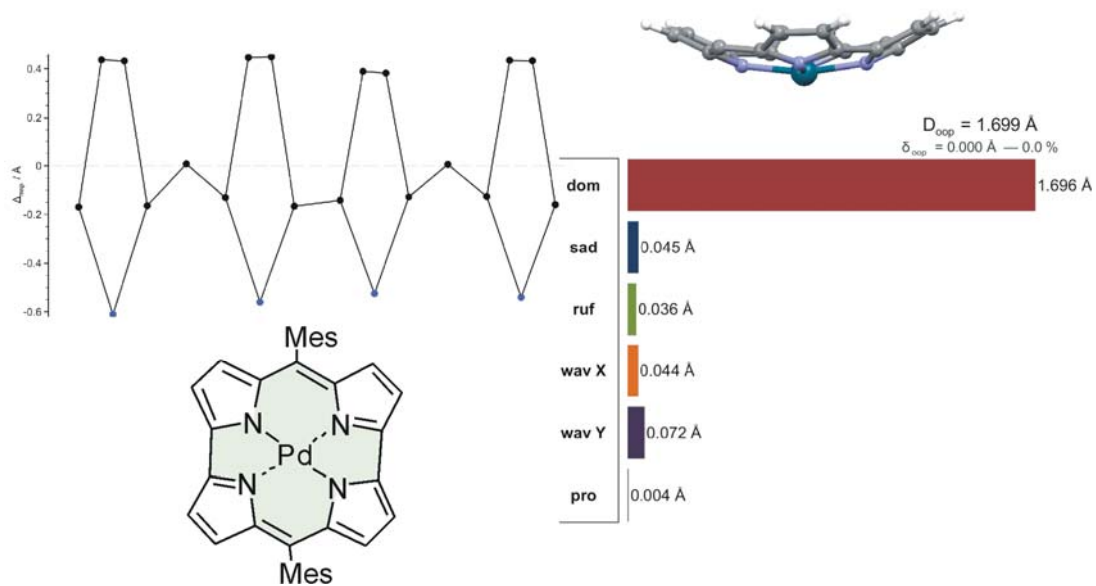

**Figure S139.** Out-of-plane displacement for norcorrolatopalladium(II).<sup>[14]</sup> Color code: brown, doming (*dom*); dark blue, saddling (*sad*); green, ruffling (*ruf*); orange, waving x (*wav X*); purple, waving y (*wav Y*); olive, propellering (*pro*).  $D_{oop}$ , the total out-of-plane distortion;  $\delta_{oop}$ , difference between  $D_{oop}$  calculated by *PorphyStruct*<sup>[11]</sup> and estimated by the normal-coordinate structure decomposition (NSD) simulation.<sup>[12,13]</sup>

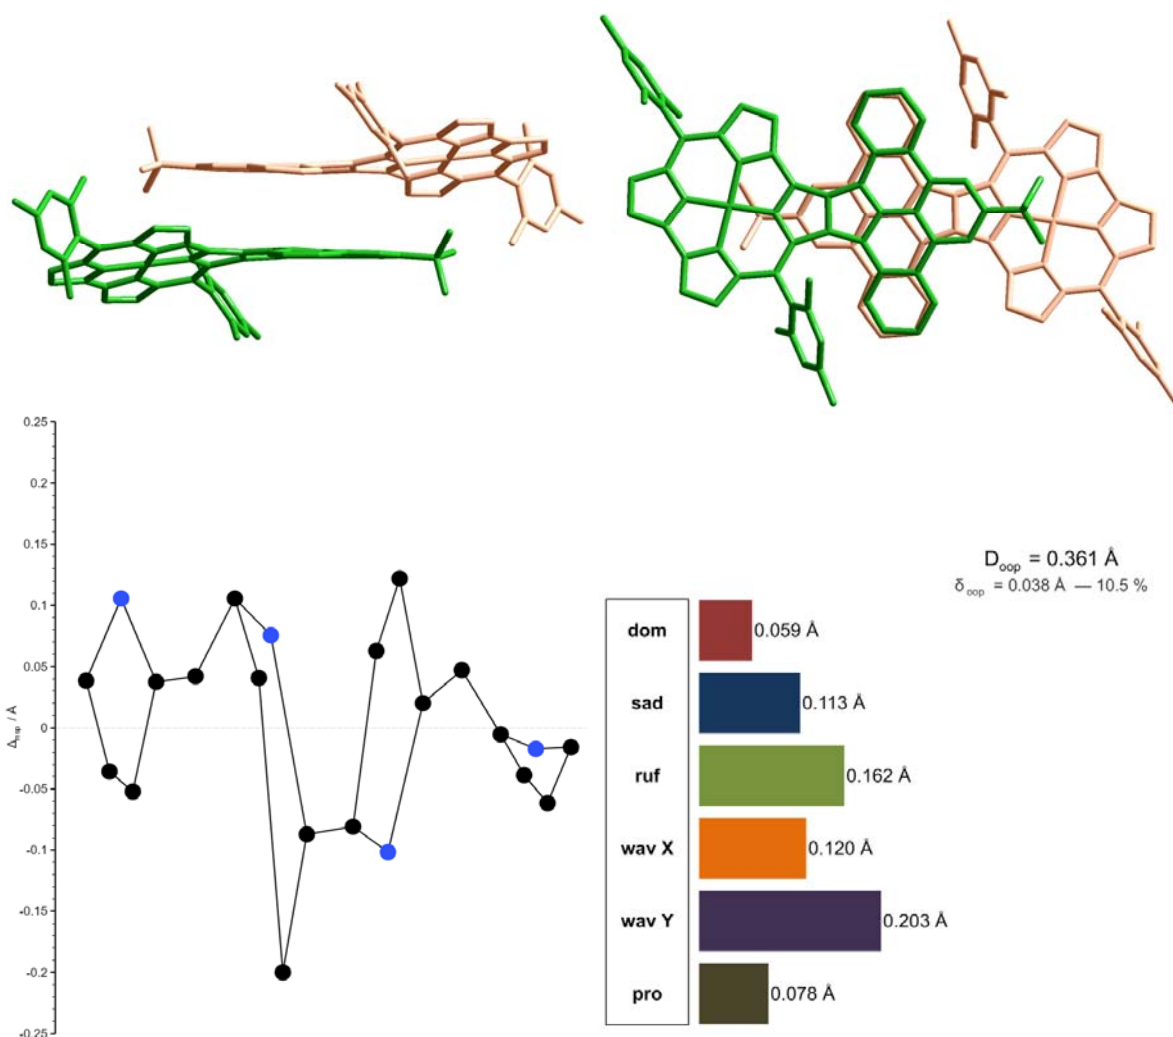

**Figure S140.** Two projections of a fragment of the packing diagram of **6** (top) and out-of-plane displacement for **6** in the solid state (bottom). Color code: brown, doming (*dom*); dark blue, saddling (*sad*); green, ruffling (*ruf*); orange, waving x (*wav X*); purple, waving y (*wav Y*); olive, propellering (*pro*).  $D_{oop}$ , the total out-of-plane distortion;  $\delta_{oop}$ , difference between  $D_{oop}$  calculated by *PorphyStruct*<sup>[11]</sup> and estimated by the normal-coordinate structure decomposition (NSD) simulation.<sup>[12,13]</sup>

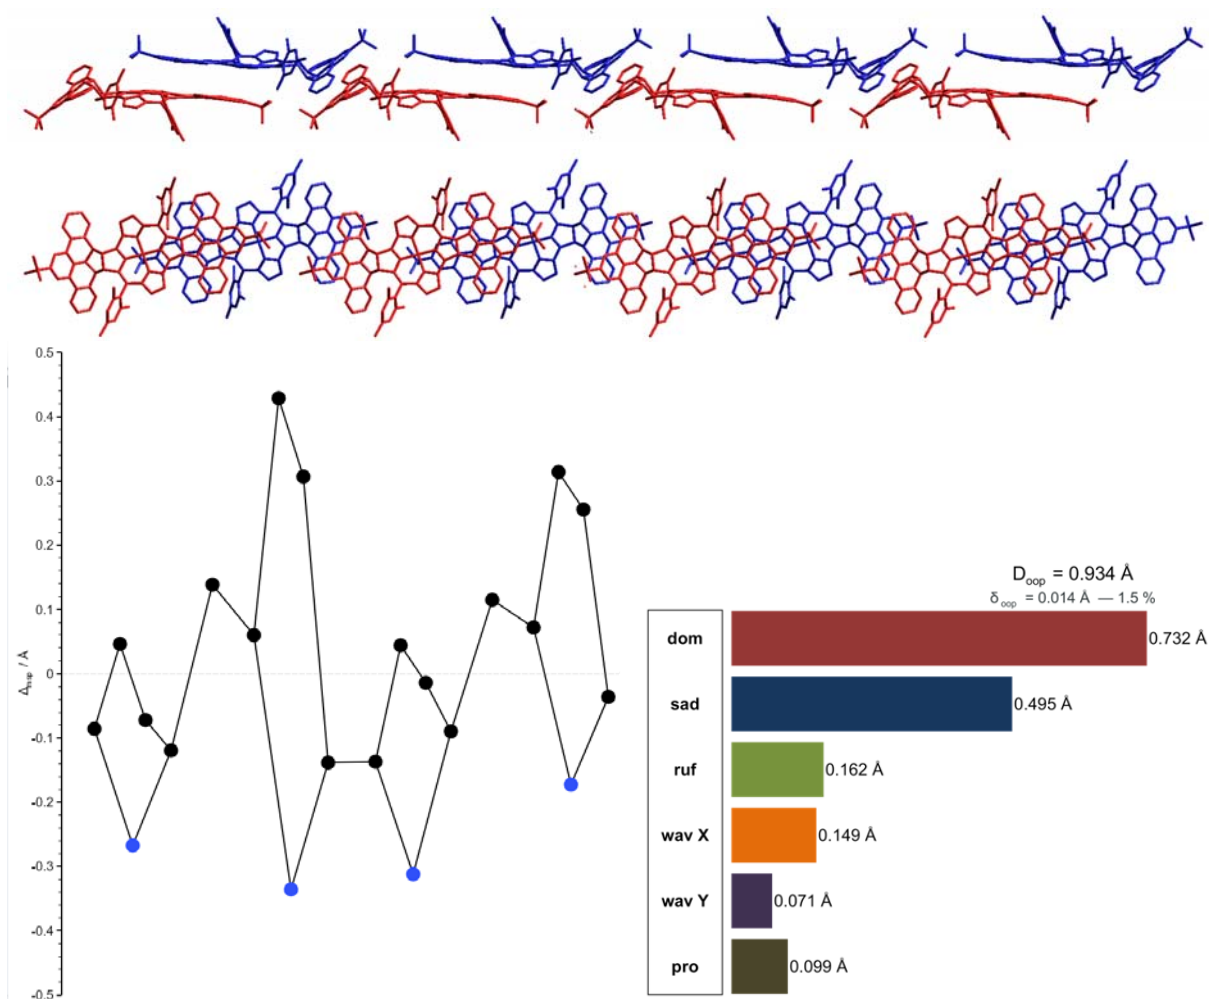

**Figure S141.** Two projections of a part of the packing diagram of **7** (top) and out-of-plane displacement for **7** in the solid state (bottom). Color code: brown, doming (*dom*); dark blue, saddling (*sad*); green, ruffling (*ruf*); orange, waving x (*wav X*); purple, waving y (*wav Y*); olive, propellering (*pro*).  $D_{opp}$ , the total out-of-plane distortion;  $\delta_{opp}$ , difference between  $D_{opp}$  calculated by *PorphyStruct*<sup>[11]</sup> and estimated by the normal-coordinate structure decomposition (NSD) simulation.<sup>[12,13]</sup>

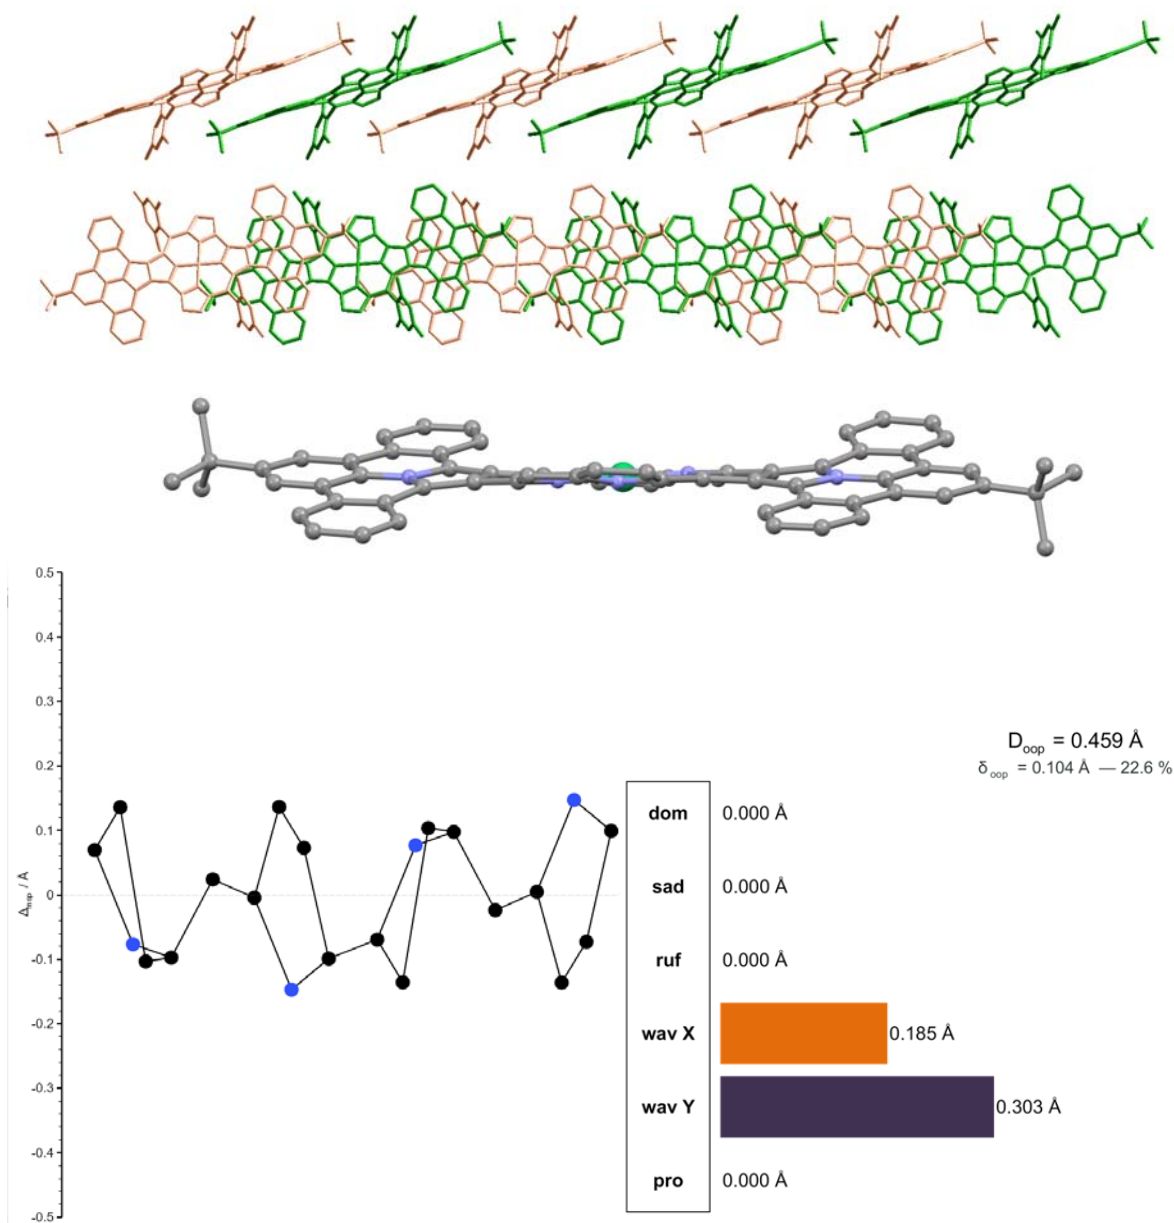

**Figure S142.** Two projections of a part of the packing diagram of **8** (top), side view of the molecular structure of **8** (balls and sticks representation), and out-of-plane displacement for **8** in the solid state (bottom). Color code: brown, doming (*dom*); dark blue, saddling (*sad*); green, ruffling (*ruf*); orange, waving x (*wav X*); purple, waving y (*wav Y*); olive propellering (*pro*).  $D_{oop}$ , the total out-of-plane distortion;  $\delta_{oop}$ , difference between  $D_{oop}$  calculated by *PorphyStruct*<sup>[11]</sup> and estimated by the normal-coordinate structure decomposition (NSD) simulation.<sup>[12,13]</sup>

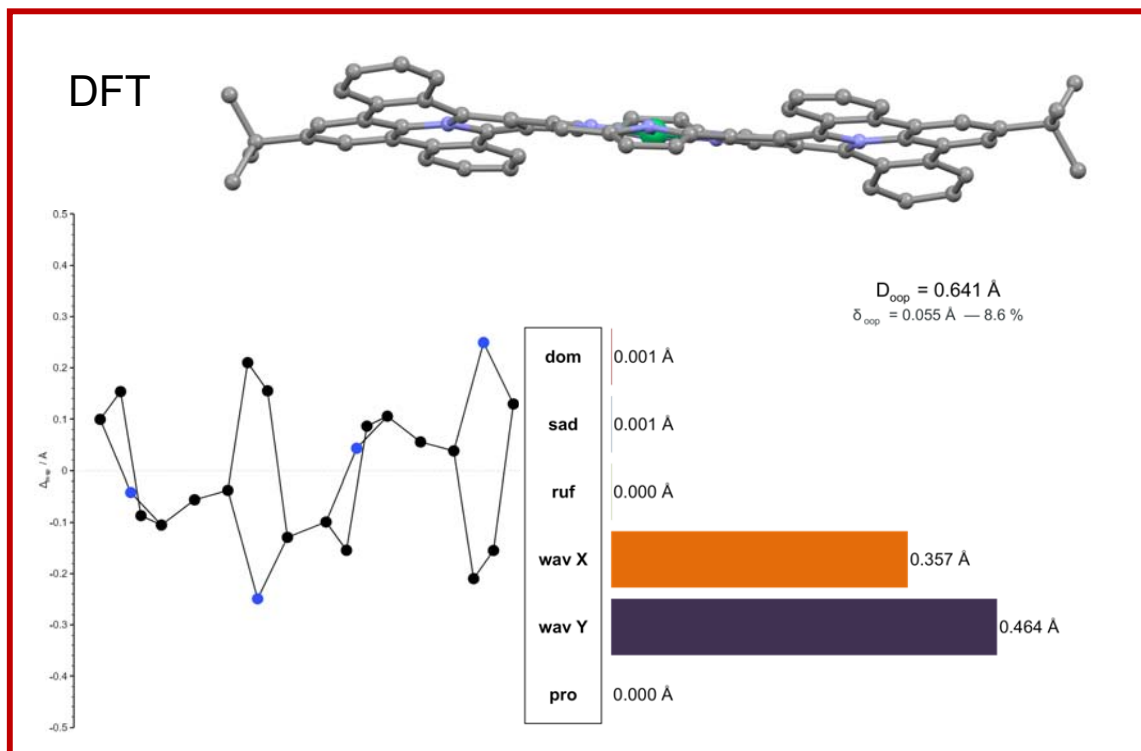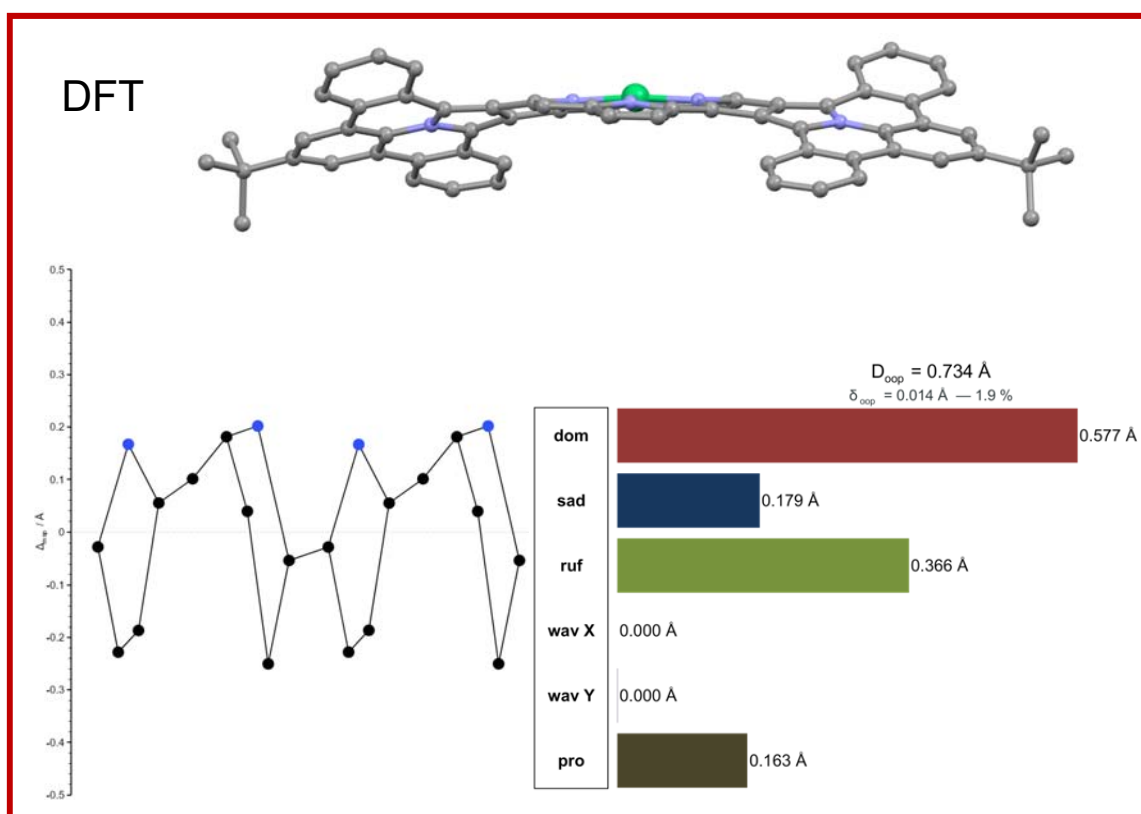

**Figure S143.** Side view of a projection of the DFT calculated structure for lowest-energy conformer of **8** and out-of-plane displacement (upper panel) and analogous presentations for the 1.11 kcal/mol less stable conformer **8b** (lower panel). Color code: brown, doming (*dom*); dark blue, saddling (*sad*); green, ruffling (*ruf*); orange, waving x (*wav X*); purple, waving y (*wav Y*); olive propellering (*pro*).  $D_{\text{oop}}$ , the total out-of-plane distortion;  $\delta_{\text{oop}}$ , difference between  $D_{\text{oop}}$  calculated by *PorphyStruct*<sup>[11]</sup> and estimated by the normal-coordinate structure decomposition (NSD) simulation.<sup>[12,13]</sup>

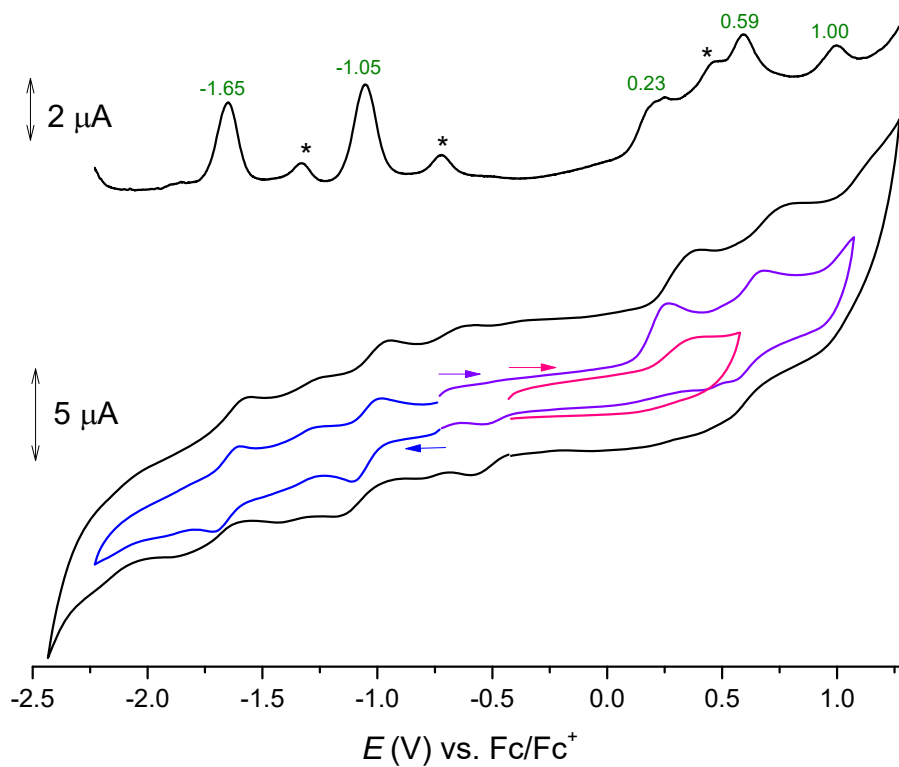

**Figure S144.** Cyclic (bottom) and differential pulse (top) voltammograms of **2a** in dichloromethane. The weaker peaks of retro-cycloaddition product **1-NO<sub>2</sub>** are marked with asterisks.

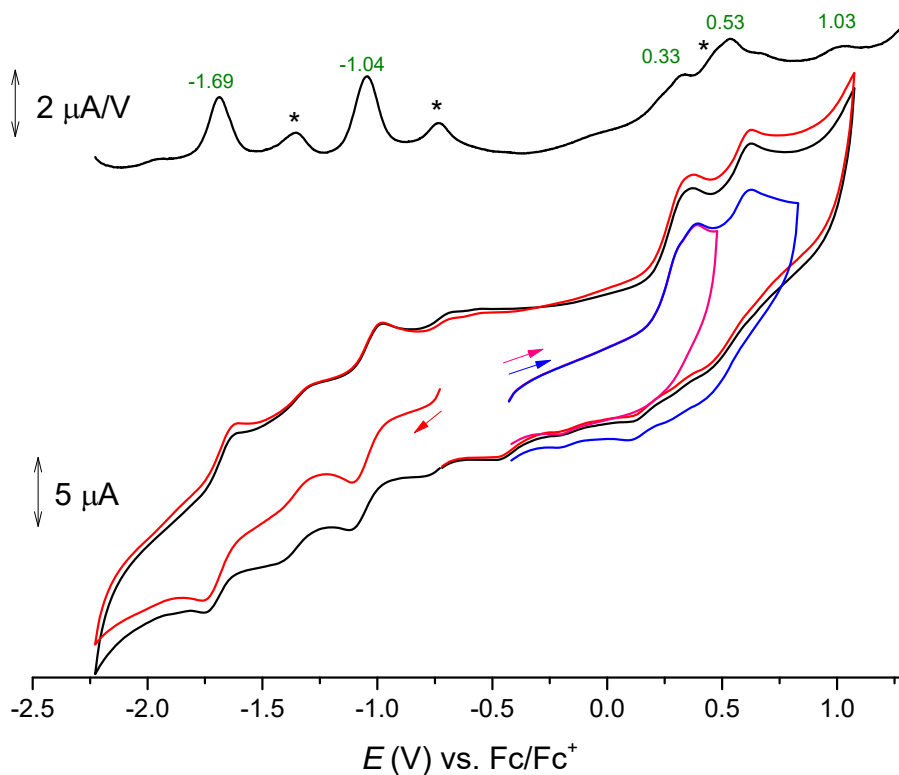

**Figure S145.** Cyclic (bottom) and differential pulse (top) voltammograms of **2b** in dichloromethane. The weaker peaks of retro-cycloaddition product **1-NO<sub>2</sub>** are marked with asterisks.

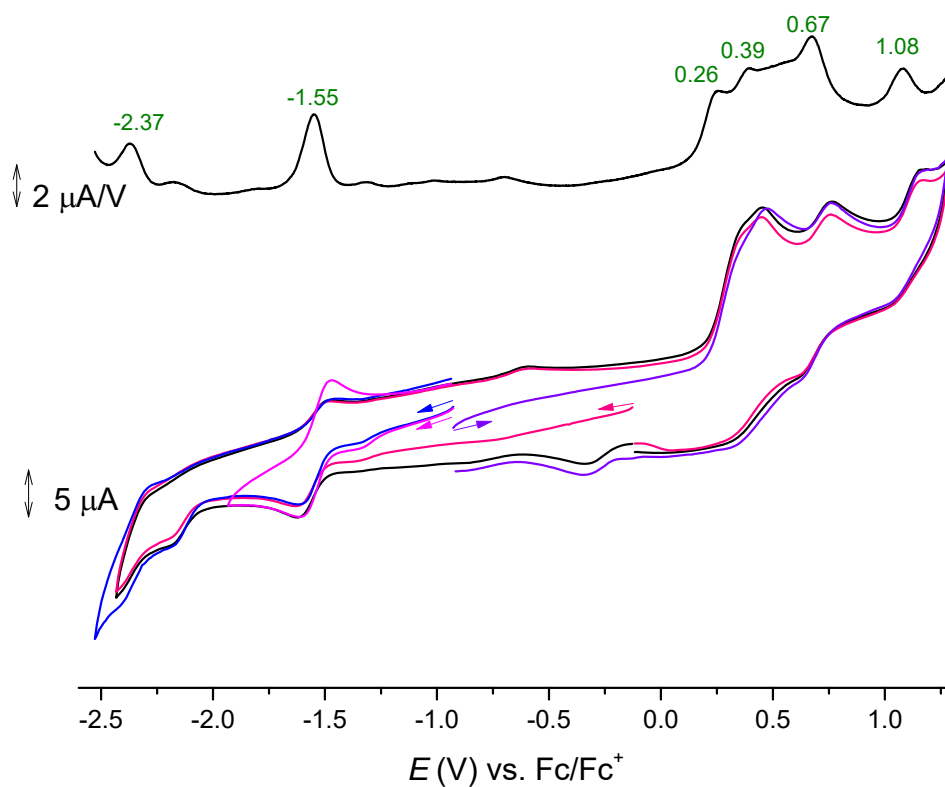

**Figure S146.** Cyclic (bottom) and differential pulse (top) voltammograms of **3-udud** in dichloromethane.

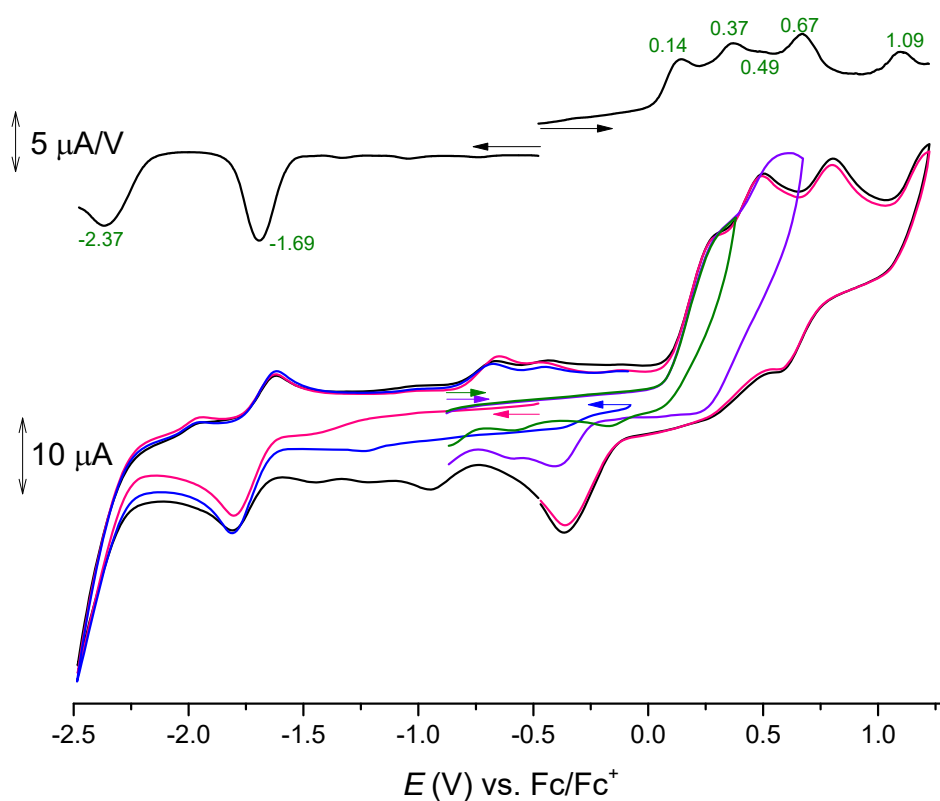

**Figure S147.** Cyclic (bottom) and differential pulse (top) voltammograms of **3-uduu** in dichloromethane.

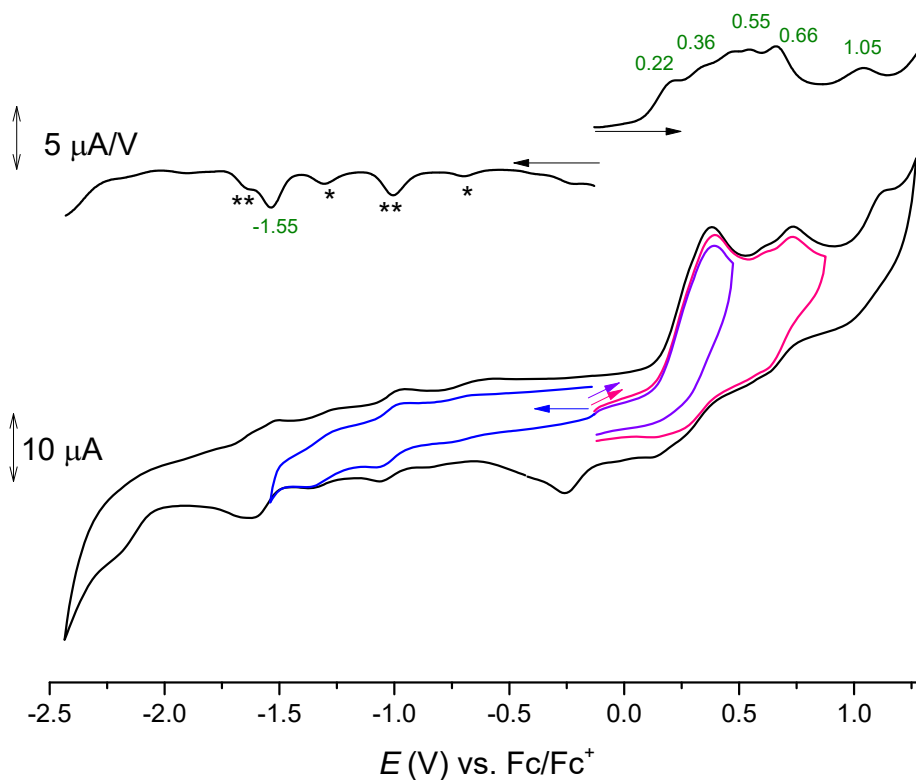

**Figure S148.** Cyclic (bottom) and differential pulse (top) voltammograms of **3-duud** in dichloromethane. The weaker peaks of retro-cycloaddition product **1-NO<sub>2</sub>** are marked with asterisks and those of **2** – with double asterisks.

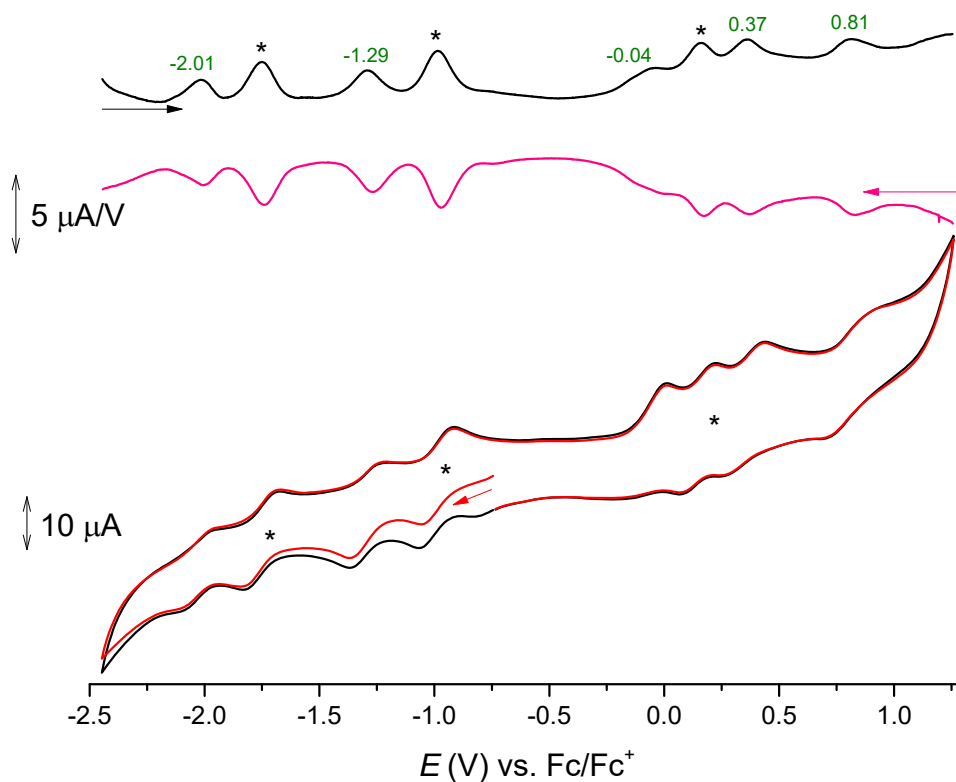

**Figure S149.** Cyclic (bottom) and differential pulse (top) voltammograms of **4** in dichloromethane. The peaks of retro-cycloaddition product **1-H** are marked with asterisks.



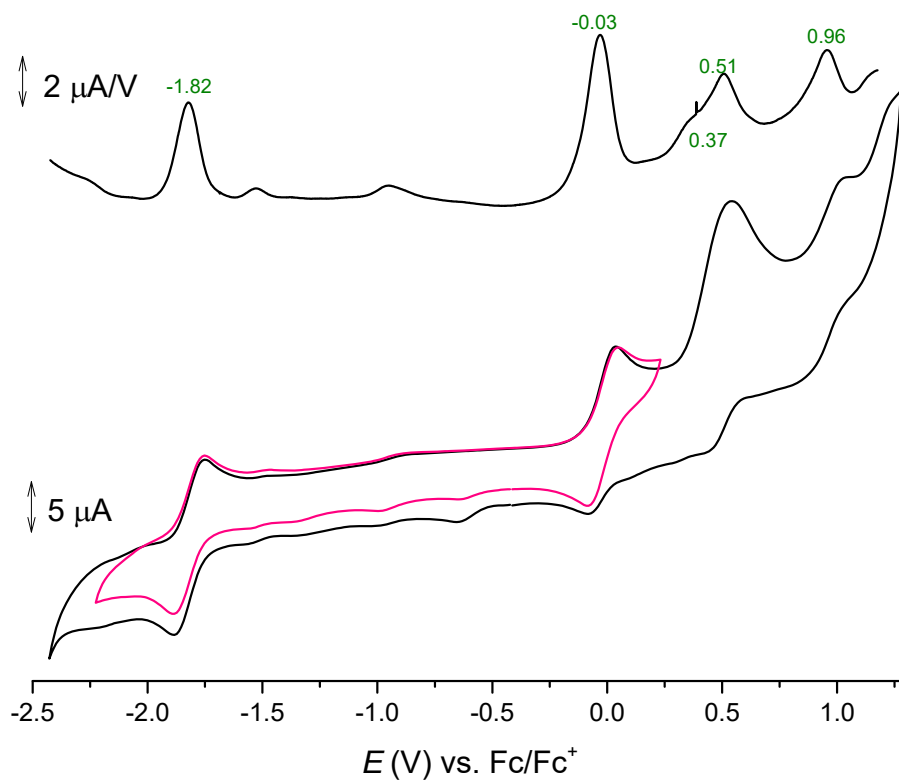

**Figure S150.** Cyclic (bottom) and differential pulse (top) voltammograms of 5-udud in dichloromethane.

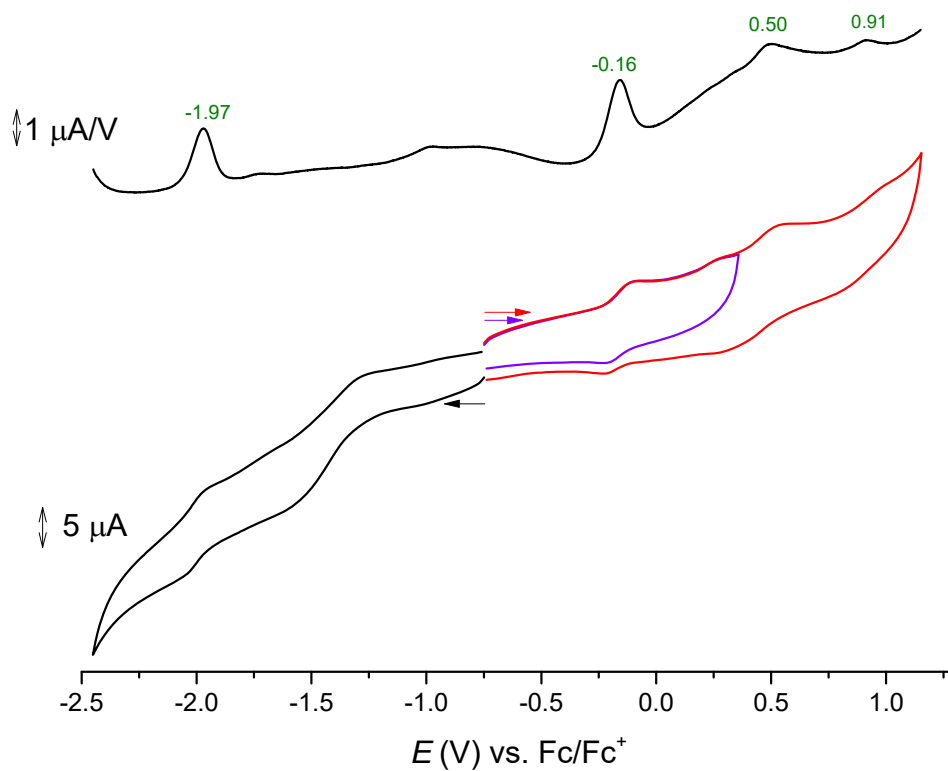

**Figure S151.** Cyclic (bottom) and differential pulse (top) voltammograms of 5-uduu in dichloromethane.

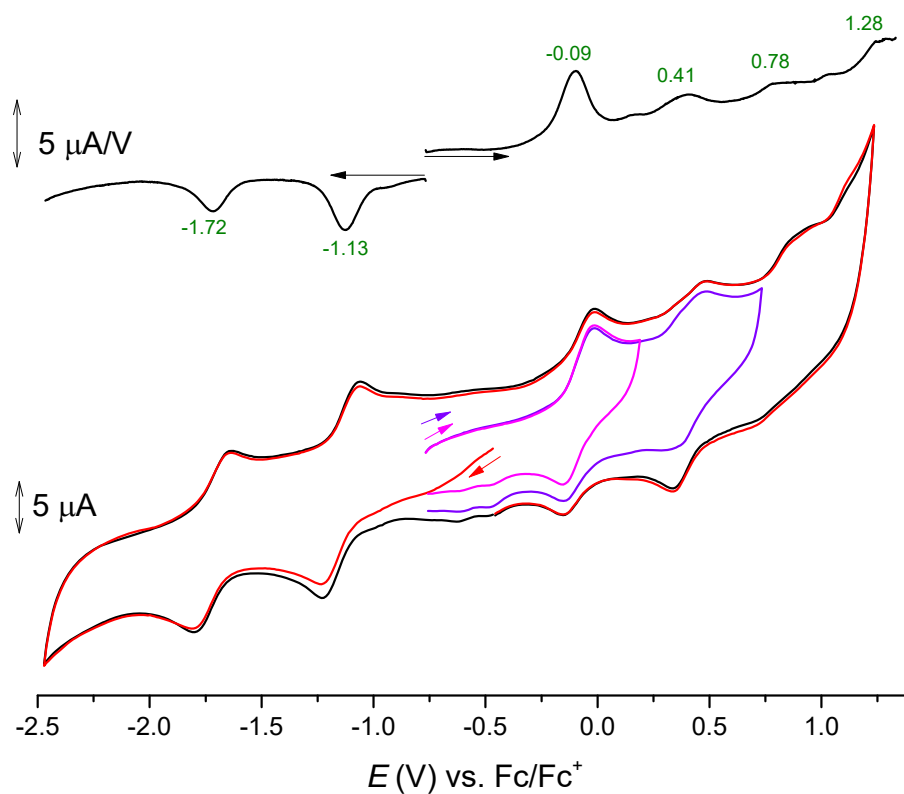

**Figure S152.** Cyclic (bottom) and differential pulse (top) voltammograms of **6** in dichloromethane.

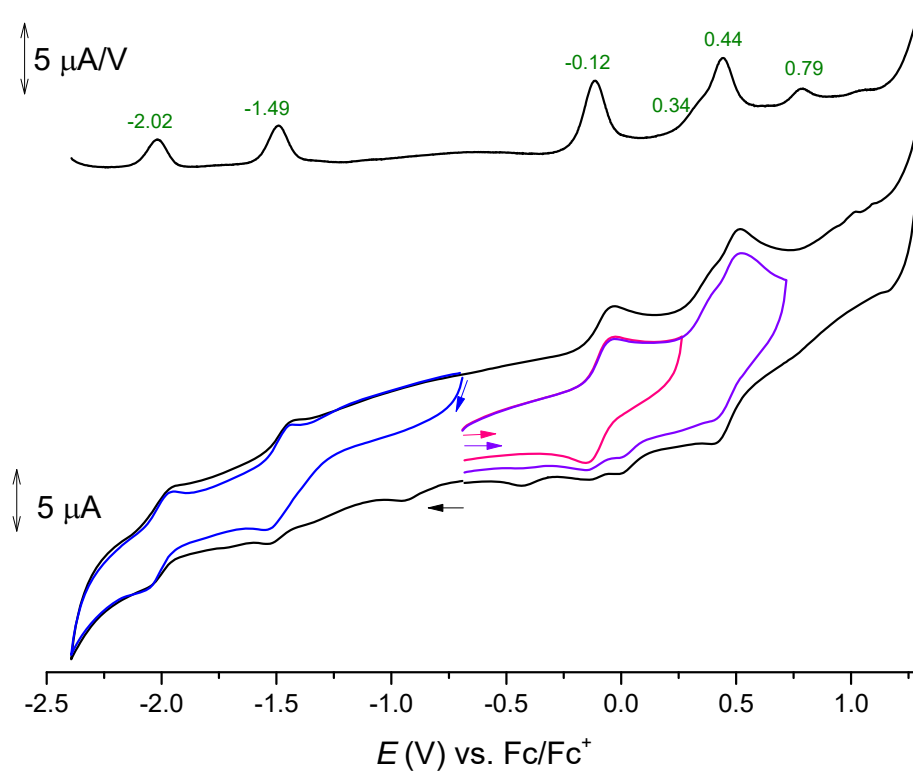

**Figure S153.** Cyclic (bottom) and differential pulse (top) voltammograms of **7** in dichloromethane.

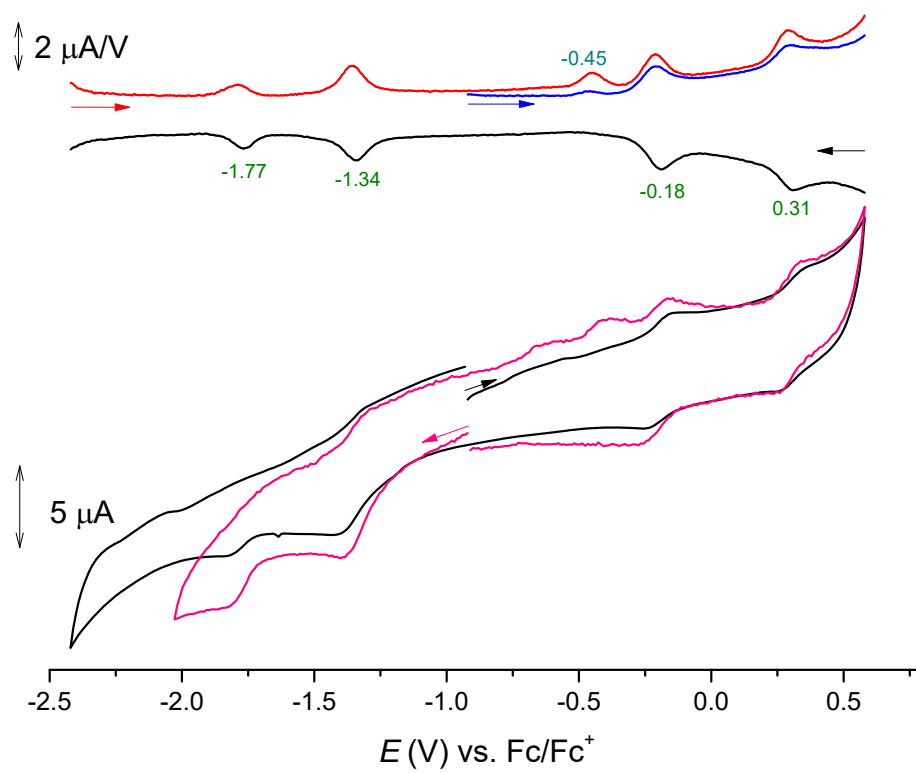

**Figure S154.** Cyclic (bottom) and differential pulse (top) voltammograms of **8** in dichloromethane.

**Table S14.** Crystallographic data for **3-duud**, **3-udud**, and **4**

| Crystal data 1                                                                                                 |                                                                                                                                                                                                         |                                                                                                                                                                                                         |                                                                                                                                                                                                                                                                                                                                                                                                                                 |
|----------------------------------------------------------------------------------------------------------------|---------------------------------------------------------------------------------------------------------------------------------------------------------------------------------------------------------|---------------------------------------------------------------------------------------------------------------------------------------------------------------------------------------------------------|---------------------------------------------------------------------------------------------------------------------------------------------------------------------------------------------------------------------------------------------------------------------------------------------------------------------------------------------------------------------------------------------------------------------------------|
|                                                                                                                | <b>3-DUUD</b>                                                                                                                                                                                           | <b>3-UDUD</b>                                                                                                                                                                                           | <b>4</b>                                                                                                                                                                                                                                                                                                                                                                                                                        |
| Chemical formula                                                                                               | C <sub>84</sub> H <sub>71</sub> N <sub>7</sub> NiO <sub>2</sub> ·C <sub>6</sub> H <sub>14</sub>                                                                                                         | 2(C <sub>84</sub> H <sub>71</sub> N <sub>7</sub> NiO <sub>2</sub> )·3(C <sub>6</sub> H <sub>14</sub> )                                                                                                  | C <sub>60</sub> H <sub>51</sub> N <sub>5</sub> Ni                                                                                                                                                                                                                                                                                                                                                                               |
| M <sub>r</sub>                                                                                                 | 1355.35                                                                                                                                                                                                 | 2796.88                                                                                                                                                                                                 | 900.77                                                                                                                                                                                                                                                                                                                                                                                                                          |
| Crystal system,<br>space group                                                                                 | Triclinic, <i>P</i> $\bar{1}$                                                                                                                                                                           | Triclinic, <i>P</i> $\bar{1}$                                                                                                                                                                           | Monoclinic, <i>P</i> 2 <sub>1</sub> / <i>n</i>                                                                                                                                                                                                                                                                                                                                                                                  |
| Temperature (K)                                                                                                | 170                                                                                                                                                                                                     | 170                                                                                                                                                                                                     | 100                                                                                                                                                                                                                                                                                                                                                                                                                             |
| a, b, c (Å)                                                                                                    | 12.3458 (2), 12.9810 (2),<br>16.1260 (3)                                                                                                                                                                | 13.9400 (3), 22.0062 (3),<br>28.7167 (4)                                                                                                                                                                | 10.9639 (3), 27.0997<br>(6), 16.6678 (5)                                                                                                                                                                                                                                                                                                                                                                                        |
| α, β, γ (°)                                                                                                    | 109.234 (2), 102.943 (2),<br>103.838 (2)                                                                                                                                                                | 75.192 (1), 78.676 (1),<br>86.730 (1)                                                                                                                                                                   | β = 105.144 (3)                                                                                                                                                                                                                                                                                                                                                                                                                 |
| V (Å <sup>3</sup> )                                                                                            | 2236.35 (7)                                                                                                                                                                                             | 8350.7 (2)                                                                                                                                                                                              | 4780.4 (2)                                                                                                                                                                                                                                                                                                                                                                                                                      |
| Z                                                                                                              | 1                                                                                                                                                                                                       | 2                                                                                                                                                                                                       | 4                                                                                                                                                                                                                                                                                                                                                                                                                               |
| Radiation type                                                                                                 | Cu Kα                                                                                                                                                                                                   | Cu Kα                                                                                                                                                                                                   | Cu Kα                                                                                                                                                                                                                                                                                                                                                                                                                           |
| μ (mm <sup>-1</sup> )                                                                                          | 0.66                                                                                                                                                                                                    | 0.72                                                                                                                                                                                                    | 0.93                                                                                                                                                                                                                                                                                                                                                                                                                            |
| Crystal Size                                                                                                   | 0.32 × 0.18 × 0.15                                                                                                                                                                                      | 0.12 × 0.11 × 0.02                                                                                                                                                                                      | 0.28 × 0.24 × 0.12                                                                                                                                                                                                                                                                                                                                                                                                              |
| Data collection                                                                                                |                                                                                                                                                                                                         |                                                                                                                                                                                                         |                                                                                                                                                                                                                                                                                                                                                                                                                                 |
| Diffractometer                                                                                                 | XtaLAB Synergy R, HyPix                                                                                                                                                                                 | XtaLAB Synergy R, HyPix                                                                                                                                                                                 | XtaLAB Synergy R, DW<br>system, HyPix-Arc 150                                                                                                                                                                                                                                                                                                                                                                                   |
| Absorption<br>correction                                                                                       | Multi-scan<br>CrysAlis PRO 1.171.40.67a<br>(Rigaku Oxford Diffraction,<br>2019) Empirical absorption<br>correction using spherical<br>harmonics, implemented in<br>SCALE3 ABSPACK scaling<br>algorithm. | Multi-scan<br>CrysAlis PRO 1.171.40.67a<br>(Rigaku Oxford Diffraction,<br>2019) Empirical absorption<br>correction using spherical<br>harmonics, implemented in<br>SCALE3 ABSPACK scaling<br>algorithm. | Analytical<br>CrysAlis PRO 1.171.41.75a<br>(Rigaku Oxford Diffraction,<br>2020) Analytical numeric<br>absorption correction using a<br>multifaceted crystal model<br>based on expressions derived<br>by R.C. Clark & J.S. Reid.<br>(Clark, R. C. & Reid, J. S.<br>(1995). Acta Cryst. A51, 887-<br>897) Empirical absorption<br>correction using spherical<br>harmonics, implemented in<br>SCALE3 ABSPACK scaling<br>algorithm. |
| Tmin, Tmax                                                                                                     | 0.767, 1.000                                                                                                                                                                                            | 0.691, 1.000                                                                                                                                                                                            | 0.831, 0.921                                                                                                                                                                                                                                                                                                                                                                                                                    |
| No. of measured,<br>independent and<br>observed [ <i>I</i> > 2σ( <i>I</i> )]<br>reflections                    | 33345, 8863, 8055                                                                                                                                                                                       | 123013, 33267, 22710                                                                                                                                                                                    | 38217, 7595, 6373                                                                                                                                                                                                                                                                                                                                                                                                               |
| R <sub>int</sub>                                                                                               | 0.044                                                                                                                                                                                                   | 0.063                                                                                                                                                                                                   | 0.092                                                                                                                                                                                                                                                                                                                                                                                                                           |
| (sin θ/λ) <sub>max</sub> (Å <sup>-1</sup> )                                                                    | 0.628                                                                                                                                                                                                   | 0.629                                                                                                                                                                                                   | 0.575                                                                                                                                                                                                                                                                                                                                                                                                                           |
| Refinement                                                                                                     |                                                                                                                                                                                                         |                                                                                                                                                                                                         |                                                                                                                                                                                                                                                                                                                                                                                                                                 |
| <i>R</i> [ <i>F</i> <sup>2</sup> > 2σ( <i>F</i> <sup>2</sup> )], <i>wR</i> ( <i>F</i> <sup>2</sup> ), <i>S</i> | 0.067, 0.197, 1.10                                                                                                                                                                                      | 0.077, 0.242, 1.02                                                                                                                                                                                      | 0.083, 0.203, 1.07                                                                                                                                                                                                                                                                                                                                                                                                              |
| No. of reflections                                                                                             | 8863                                                                                                                                                                                                    | 33267                                                                                                                                                                                                   | 7595                                                                                                                                                                                                                                                                                                                                                                                                                            |
| No. of parameters                                                                                              | 504                                                                                                                                                                                                     | 1885                                                                                                                                                                                                    | 607                                                                                                                                                                                                                                                                                                                                                                                                                             |
| H-atom treatment                                                                                               | H-atom parameters<br>constrained                                                                                                                                                                        | H-atom parameters<br>constrained                                                                                                                                                                        | H-atom parameters<br>constrained                                                                                                                                                                                                                                                                                                                                                                                                |
| Δρ <sub>max</sub> , Δρ <sub>min</sub> (e Å <sup>-3</sup> )                                                     | 0.85, -0.50                                                                                                                                                                                             | 1.15, -0.45                                                                                                                                                                                             | 1.31, -0.64                                                                                                                                                                                                                                                                                                                                                                                                                     |
| CCDC number                                                                                                    | 2116817                                                                                                                                                                                                 | 2116818                                                                                                                                                                                                 | 2116823                                                                                                                                                                                                                                                                                                                                                                                                                         |

**Table S15.** Crystallographic data for 5-uduu, 5-udud, and 6

| Crystal data 2                                                                      |                                                                                                                                                                                                         |                                                                                                                                                                                                         |                                                                                                                                                                                                         |
|-------------------------------------------------------------------------------------|---------------------------------------------------------------------------------------------------------------------------------------------------------------------------------------------------------|---------------------------------------------------------------------------------------------------------------------------------------------------------------------------------------------------------|---------------------------------------------------------------------------------------------------------------------------------------------------------------------------------------------------------|
|                                                                                     | 5-UDUU                                                                                                                                                                                                  | 5-UDUD                                                                                                                                                                                                  | 6                                                                                                                                                                                                       |
| Chemical formula                                                                    | C <sub>84</sub> H <sub>72</sub> N <sub>6</sub> Ni                                                                                                                                                       | C <sub>84</sub> H <sub>72</sub> N <sub>6</sub> Ni                                                                                                                                                       | C <sub>60</sub> H <sub>47</sub> N <sub>5</sub> Ni                                                                                                                                                       |
| M <sub>r</sub>                                                                      | 1224.18                                                                                                                                                                                                 | 1224.18                                                                                                                                                                                                 | 896.73                                                                                                                                                                                                  |
| Crystal system,<br>space group                                                      | Triclinic, $P\bar{1}$                                                                                                                                                                                   | Monoclinic, $P2_1$                                                                                                                                                                                      | Triclinic, $P\bar{1}$                                                                                                                                                                                   |
| Temperature (K)                                                                     | 170                                                                                                                                                                                                     | 100                                                                                                                                                                                                     | 170                                                                                                                                                                                                     |
| a, b, c (Å)                                                                         | 13.2040 (1), 14.0442 (1),<br>21.9436 (2)                                                                                                                                                                | 14.0097 (6), 28.3409<br>(11), 19.4461 (6)                                                                                                                                                               | 10.9575 (2), 13.4987<br>(3), 18.8848 (4)                                                                                                                                                                |
| $\alpha, \beta, \gamma$ (°)                                                         | 82.844 (1), 73.132 (1),<br>85.129 (1)                                                                                                                                                                   | $\beta = 91.810$ (3)                                                                                                                                                                                    | 73.327 (2), 74.156 (2),<br>82.126 (2)                                                                                                                                                                   |
| V (Å <sup>3</sup> )                                                                 | 3858.71 (6)                                                                                                                                                                                             | 7717.2 (5)                                                                                                                                                                                              | 2568.97 (10)                                                                                                                                                                                            |
| Z                                                                                   | 2                                                                                                                                                                                                       | 4                                                                                                                                                                                                       | 2                                                                                                                                                                                                       |
| Radiation type                                                                      | Cu K $\alpha$                                                                                                                                                                                           | Cu K $\alpha$                                                                                                                                                                                           | Cu K $\alpha$                                                                                                                                                                                           |
| $\mu$ (mm <sup>-1</sup> )                                                           | 0.69                                                                                                                                                                                                    | 0.69                                                                                                                                                                                                    | 0.86                                                                                                                                                                                                    |
| Crystal Size                                                                        | 0.25 × 0.25 × 0.05                                                                                                                                                                                      | 0.14 × 0.10 × 0.09                                                                                                                                                                                      | 0.27 × 0.18 × 0.04                                                                                                                                                                                      |
| Data collection                                                                     |                                                                                                                                                                                                         |                                                                                                                                                                                                         |                                                                                                                                                                                                         |
| Diffractometer                                                                      | XtaLAB Synergy R, HyPix                                                                                                                                                                                 | XtaLAB Synergy R, HyPix                                                                                                                                                                                 | XtaLAB Synergy R, DW<br>system, HyPix-Arc 150                                                                                                                                                           |
| Absorption<br>correction                                                            | Multi-scan<br>CrysAlis PRO 1.171.40.67a<br>(Rigaku Oxford Diffraction,<br>2019) Empirical absorption<br>correction using spherical<br>harmonics, implemented in<br>SCALE3 ABSPACK scaling<br>algorithm. | Multi-scan<br>CrysAlis PRO 1.171.40.67a<br>(Rigaku Oxford Diffraction,<br>2019) Empirical absorption<br>correction using spherical<br>harmonics, implemented in<br>SCALE3 ABSPACK scaling<br>algorithm. | Multi-scan<br>CrysAlis PRO 1.171.40.67a<br>(Rigaku Oxford Diffraction,<br>2019) Empirical absorption<br>correction using spherical<br>harmonics, implemented in<br>SCALE3 ABSPACK scaling<br>algorithm. |
| Tmin, Tmax                                                                          | 0.949, 1.000                                                                                                                                                                                            | 0.651, 1.000                                                                                                                                                                                            | 0.878, 1.000                                                                                                                                                                                            |
| No. of measured,<br>independent and<br>observed [ $I > 2\sigma(I)$ ]<br>reflections | 59921, 14118, 13358                                                                                                                                                                                     | 22671, 22671, 13816                                                                                                                                                                                     | 37849, 10270, 9403                                                                                                                                                                                      |
| Rint                                                                                | 0.021                                                                                                                                                                                                   | TWIN                                                                                                                                                                                                    | 0.023                                                                                                                                                                                                   |
| ( $\sin \theta/\lambda$ ) <sub>max</sub> (Å <sup>-1</sup> )                         | 0.602                                                                                                                                                                                                   | 0.575                                                                                                                                                                                                   | 0.628                                                                                                                                                                                                   |
| Refinement                                                                          |                                                                                                                                                                                                         |                                                                                                                                                                                                         |                                                                                                                                                                                                         |
| $R[F^2 > 2\sigma(F^2)], wR(F^2), S$                                                 | 0.049, 0.139, 1.09                                                                                                                                                                                      | 0.102, 0.304, 1.02                                                                                                                                                                                      | 0.041, 0.114, 1.05                                                                                                                                                                                      |
| No. of reflections                                                                  | 14118                                                                                                                                                                                                   | 22671                                                                                                                                                                                                   | 10270                                                                                                                                                                                                   |
| No. of parameters                                                                   | 863                                                                                                                                                                                                     | 1604                                                                                                                                                                                                    | 604                                                                                                                                                                                                     |
| H-atom treatment                                                                    | H-atom parameters<br>constrained                                                                                                                                                                        | H-atom parameters<br>constrained                                                                                                                                                                        | H-atom parameters<br>constrained                                                                                                                                                                        |
| $\Delta\rho_{\max}, \Delta\rho_{\min}$ (e Å <sup>-3</sup> )                         | 0.25, -0.45                                                                                                                                                                                             | 1.90, -0.61                                                                                                                                                                                             | 0.26, -0.29                                                                                                                                                                                             |
| CCDC number                                                                         | 2116821                                                                                                                                                                                                 | 2116820                                                                                                                                                                                                 | 2116819                                                                                                                                                                                                 |

**Table S16.** Crystallographic data for **7** and **8**.

| Crystal data 3                                                                                                          |                                                                                                                                                                                                                                                                                                                                                                                                                             |                                                                                                                                                                                                                                                                                                                                                                                                                                 |
|-------------------------------------------------------------------------------------------------------------------------|-----------------------------------------------------------------------------------------------------------------------------------------------------------------------------------------------------------------------------------------------------------------------------------------------------------------------------------------------------------------------------------------------------------------------------|---------------------------------------------------------------------------------------------------------------------------------------------------------------------------------------------------------------------------------------------------------------------------------------------------------------------------------------------------------------------------------------------------------------------------------|
|                                                                                                                         | <b>7</b>                                                                                                                                                                                                                                                                                                                                                                                                                    | <b>8</b>                                                                                                                                                                                                                                                                                                                                                                                                                        |
| Chemical formula                                                                                                        | C <sub>84</sub> H <sub>68</sub> N <sub>6</sub> Ni                                                                                                                                                                                                                                                                                                                                                                           | C <sub>84</sub> H <sub>64</sub> N <sub>6</sub> Ni·2(C <sub>6</sub> H <sub>6</sub> )                                                                                                                                                                                                                                                                                                                                             |
| M <sub>r</sub>                                                                                                          | 1220.15                                                                                                                                                                                                                                                                                                                                                                                                                     | 1372.33                                                                                                                                                                                                                                                                                                                                                                                                                         |
| Crystal system,<br>space group                                                                                          | Triclinic, <i>P</i> $\bar{1}$                                                                                                                                                                                                                                                                                                                                                                                               | Triclinic, <i>P</i> $\bar{1}$                                                                                                                                                                                                                                                                                                                                                                                                   |
| Temperature (K)                                                                                                         | 100                                                                                                                                                                                                                                                                                                                                                                                                                         | 100                                                                                                                                                                                                                                                                                                                                                                                                                             |
| a, b, c (Å)                                                                                                             | 14.1056 (3), 16.2881 (4),<br>16.8703 (3)                                                                                                                                                                                                                                                                                                                                                                                    | 11.8776 (7), 12.4674 (5),<br>13.0460 (7)                                                                                                                                                                                                                                                                                                                                                                                        |
| $\alpha$ , $\beta$ , $\gamma$ (°)                                                                                       | 68.754 (2), 68.962 (2),<br>83.788 (2)                                                                                                                                                                                                                                                                                                                                                                                       | 104.320 (4), 108.420 (5),<br>98.286 (4)                                                                                                                                                                                                                                                                                                                                                                                         |
| V (Å <sup>3</sup> )                                                                                                     | 3370.7 (2)                                                                                                                                                                                                                                                                                                                                                                                                                  | 1723.3 (2)                                                                                                                                                                                                                                                                                                                                                                                                                      |
| Z                                                                                                                       | 2                                                                                                                                                                                                                                                                                                                                                                                                                           | 1                                                                                                                                                                                                                                                                                                                                                                                                                               |
| Radiation type                                                                                                          | Cu K $\alpha$                                                                                                                                                                                                                                                                                                                                                                                                               | Cu K $\alpha$                                                                                                                                                                                                                                                                                                                                                                                                                   |
| $\mu$ (mm <sup>-1</sup> )                                                                                               | 0.80                                                                                                                                                                                                                                                                                                                                                                                                                        | 0.84                                                                                                                                                                                                                                                                                                                                                                                                                            |
| Crystal Size                                                                                                            | 0.09 × 0.09 × 0.04                                                                                                                                                                                                                                                                                                                                                                                                          | 0.14 × 0.07 × 0.04                                                                                                                                                                                                                                                                                                                                                                                                              |
| Data collection                                                                                                         |                                                                                                                                                                                                                                                                                                                                                                                                                             |                                                                                                                                                                                                                                                                                                                                                                                                                                 |
| <b>Diffractometer</b>                                                                                                   | XtaLAB Synergy R, DW<br>system, HyPix-Arc 150                                                                                                                                                                                                                                                                                                                                                                               | XtaLAB Synergy R, DW<br>system, HyPix-Arc 150                                                                                                                                                                                                                                                                                                                                                                                   |
| Absorption<br>correction                                                                                                | Analytical<br>CrysAlis PRO 1.171.41.75a<br>(Rigaku Oxford Diffraction,<br>2020) Analytical numeric<br>absorption correction using a<br>multifaceted crystal model<br>based on expressions derived<br>by R.C. Clark & J.S. Reid. (Clark,<br>R. C. & Reid, J. S. (1995). Acta<br>Cryst. A51, 887-897) Empirical<br>absorption correction using<br>spherical harmonics,<br>implemented in SCALE3<br>ABSPACK scaling algorithm. | Analytical<br>CrysAlis PRO 1.171.41.75a<br>(Rigaku Oxford Diffraction,<br>2020) Analytical numeric<br>absorption correction using a<br>multifaceted crystal model<br>based on expressions derived<br>by R.C. Clark & J.S. Reid.<br>(Clark, R. C. & Reid, J. S.<br>(1995). Acta Cryst. A51, 887-<br>897) Empirical absorption<br>correction using spherical<br>harmonics, implemented in<br>SCALE3 ABSPACK scaling<br>algorithm. |
| Tmin, Tmax                                                                                                              | 0.951, 0.980                                                                                                                                                                                                                                                                                                                                                                                                                | 0.926, 0.971                                                                                                                                                                                                                                                                                                                                                                                                                    |
| No. of measured,<br>independent and<br>observed [ <i>I</i> > 2 $\sigma$ ( <i>I</i> )]<br>reflections                    | 60317, 10751, 7938                                                                                                                                                                                                                                                                                                                                                                                                          | 19555, 5833, 4069                                                                                                                                                                                                                                                                                                                                                                                                               |
| Rint                                                                                                                    | 0.072                                                                                                                                                                                                                                                                                                                                                                                                                       | 0.042                                                                                                                                                                                                                                                                                                                                                                                                                           |
| (sin $\theta$ / $\lambda$ ) <sub>max</sub> (Å <sup>-1</sup> )                                                           | 0.575                                                                                                                                                                                                                                                                                                                                                                                                                       | 0.588                                                                                                                                                                                                                                                                                                                                                                                                                           |
| Refinement                                                                                                              |                                                                                                                                                                                                                                                                                                                                                                                                                             |                                                                                                                                                                                                                                                                                                                                                                                                                                 |
| <i>R</i> [ <i>F</i> <sup>2</sup> > 2 $\sigma$ ( <i>F</i> <sup>2</sup> )], <i>wR</i> ( <i>F</i> <sup>2</sup> ), <i>S</i> | 0.066, 0.197, 1.03                                                                                                                                                                                                                                                                                                                                                                                                          | 0.071, 0.197, 1.07                                                                                                                                                                                                                                                                                                                                                                                                              |
| No. of reflections                                                                                                      | 10751                                                                                                                                                                                                                                                                                                                                                                                                                       | 5833                                                                                                                                                                                                                                                                                                                                                                                                                            |
| No. of parameters                                                                                                       | 869                                                                                                                                                                                                                                                                                                                                                                                                                         | 472                                                                                                                                                                                                                                                                                                                                                                                                                             |
| H-atom treatment                                                                                                        | H-atom parameters<br>constrained                                                                                                                                                                                                                                                                                                                                                                                            | H-atom parameters<br>constrained                                                                                                                                                                                                                                                                                                                                                                                                |
| $\Delta\rho_{\max}$ , $\Delta\rho_{\min}$ (e Å <sup>-3</sup> )                                                          | 1.01, -0.50                                                                                                                                                                                                                                                                                                                                                                                                                 | 0.88, -0.74                                                                                                                                                                                                                                                                                                                                                                                                                     |
| CCDC number                                                                                                             | 2116822                                                                                                                                                                                                                                                                                                                                                                                                                     | 2116824                                                                                                                                                                                                                                                                                                                                                                                                                         |

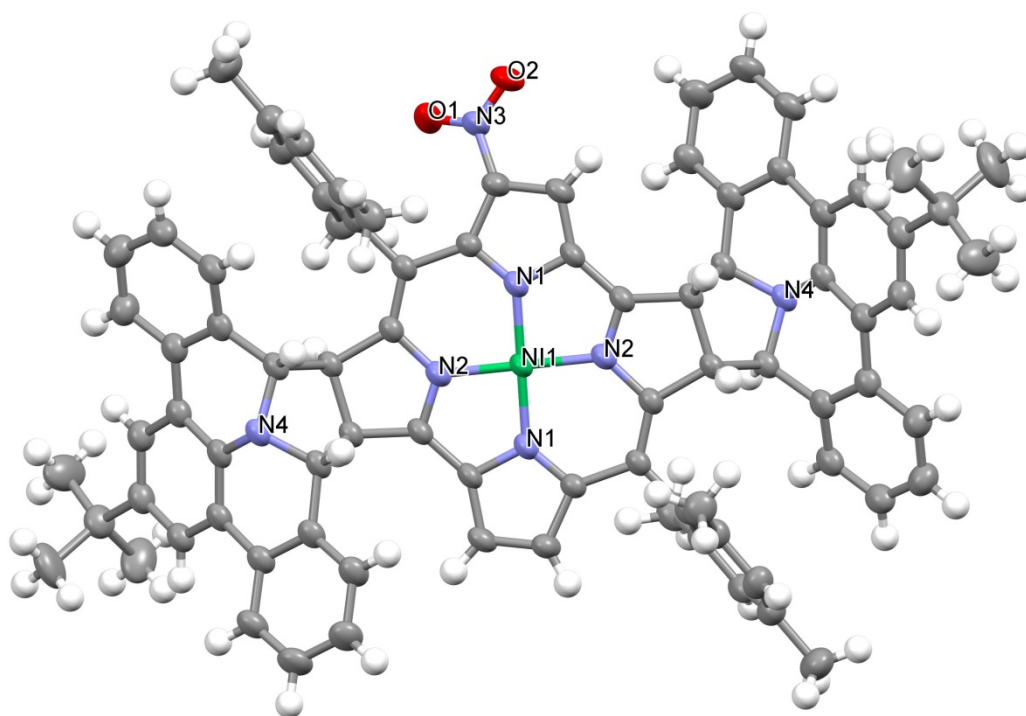

**Figure S155.** Perspective plot (thermal ellipsoids are set at a 50% probability level) of the molecular structure of **3-duud**.

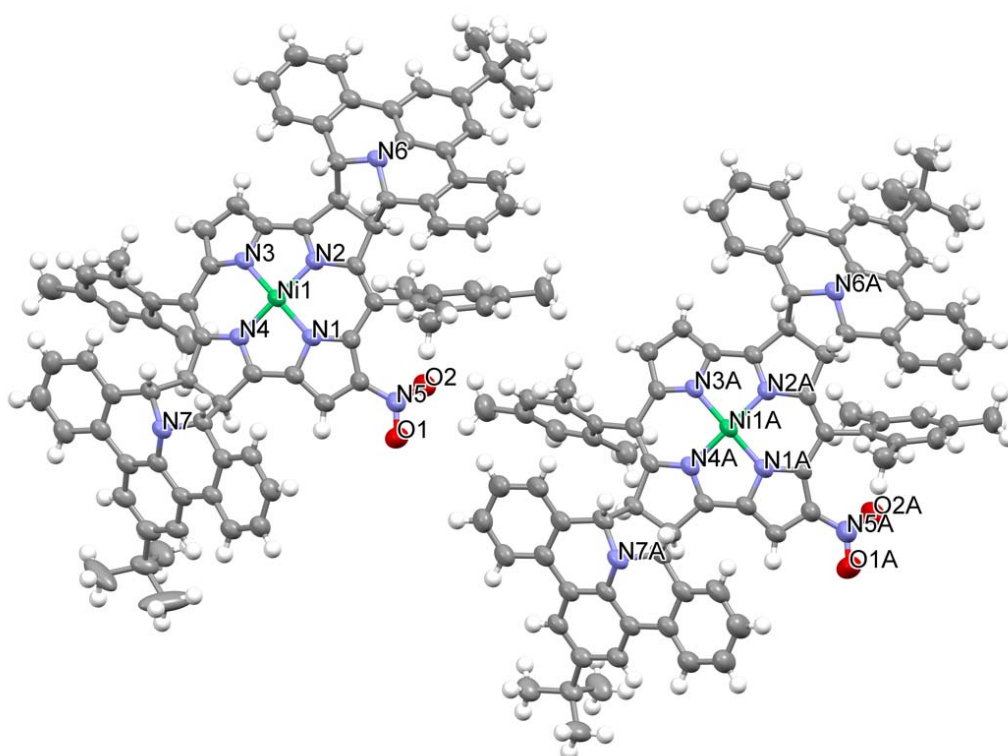

**Figure S156.** Perspective plot (thermal ellipsoids are set at a 50% probability level) of the asymmetric part of the crystal structure of **3-udud**. The solvent molecules (3 hexane molecules) are omitted for clarity.

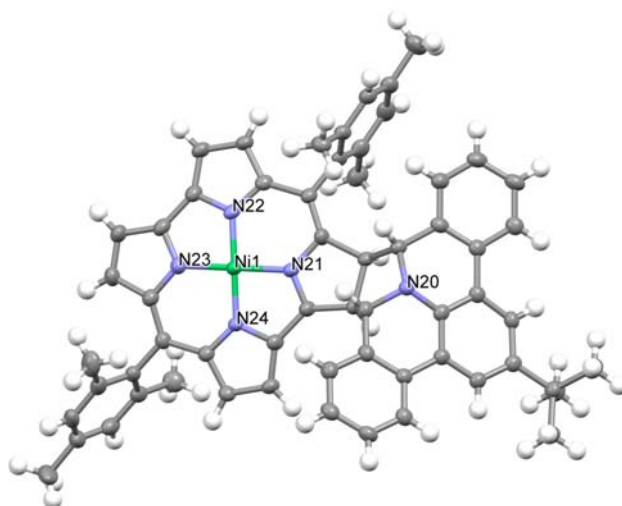

**Figure S157.** Perspective plot (thermal ellipsoids are set at a 50% probability level) of the molecular structure of **4**.

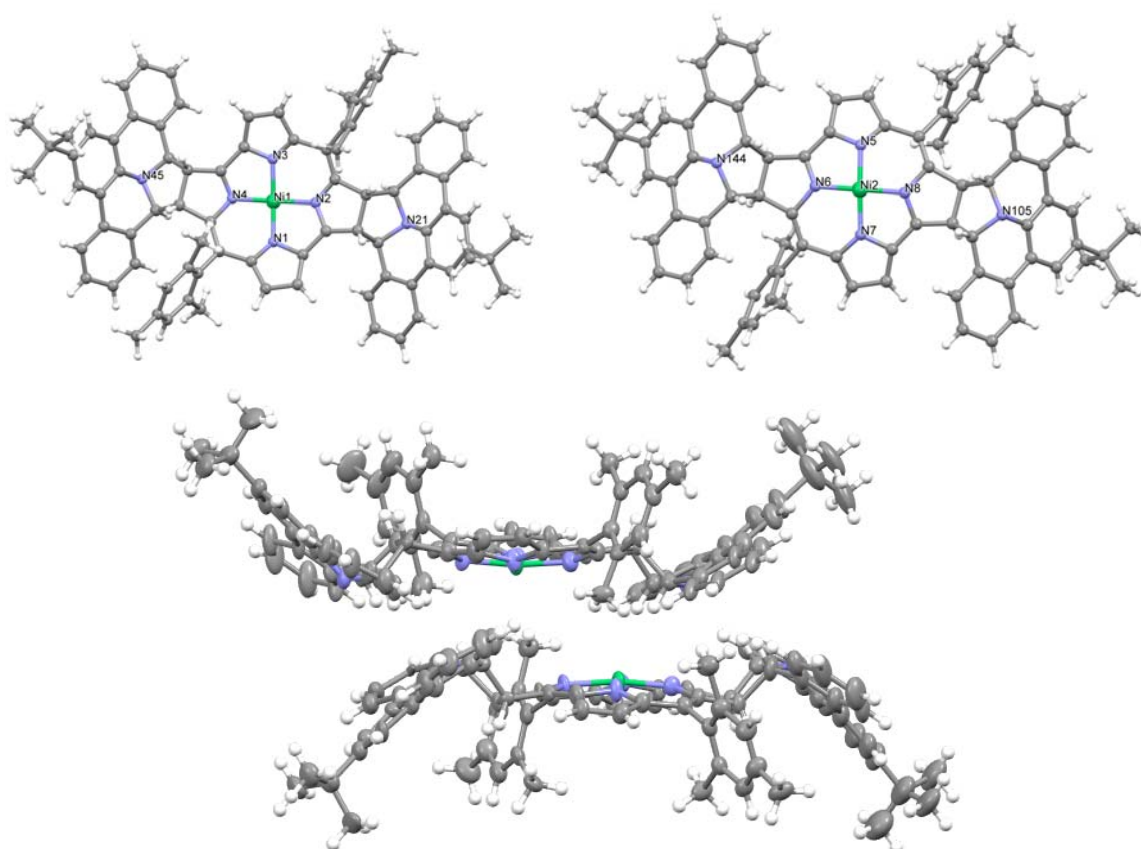

**Figure S158.** Perspective ball-and-sticks plot of the independent molecules from asymmetric part of the crystal structure of **5-udud** (top) and a side view of these molecules with thermal ellipsoids set at a 50% probability level (bottom).



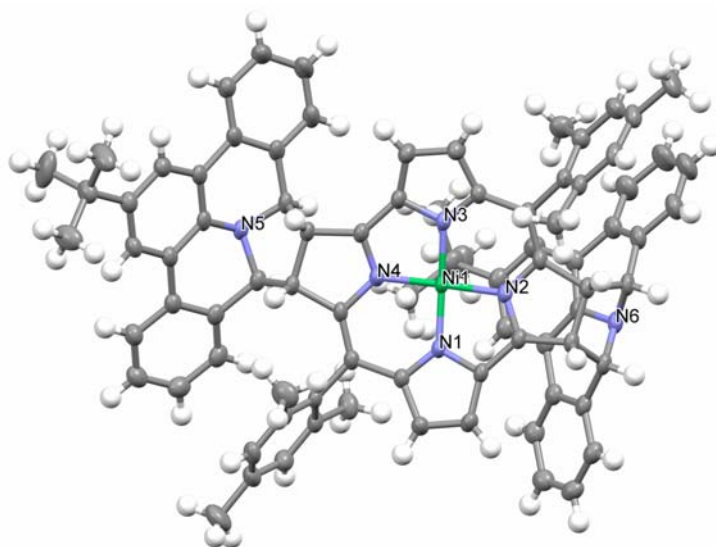

**Figure S159.** Perspective plot (thermal ellipsoids are set at a 50% probability level) of the molecular structure of 5-udu.

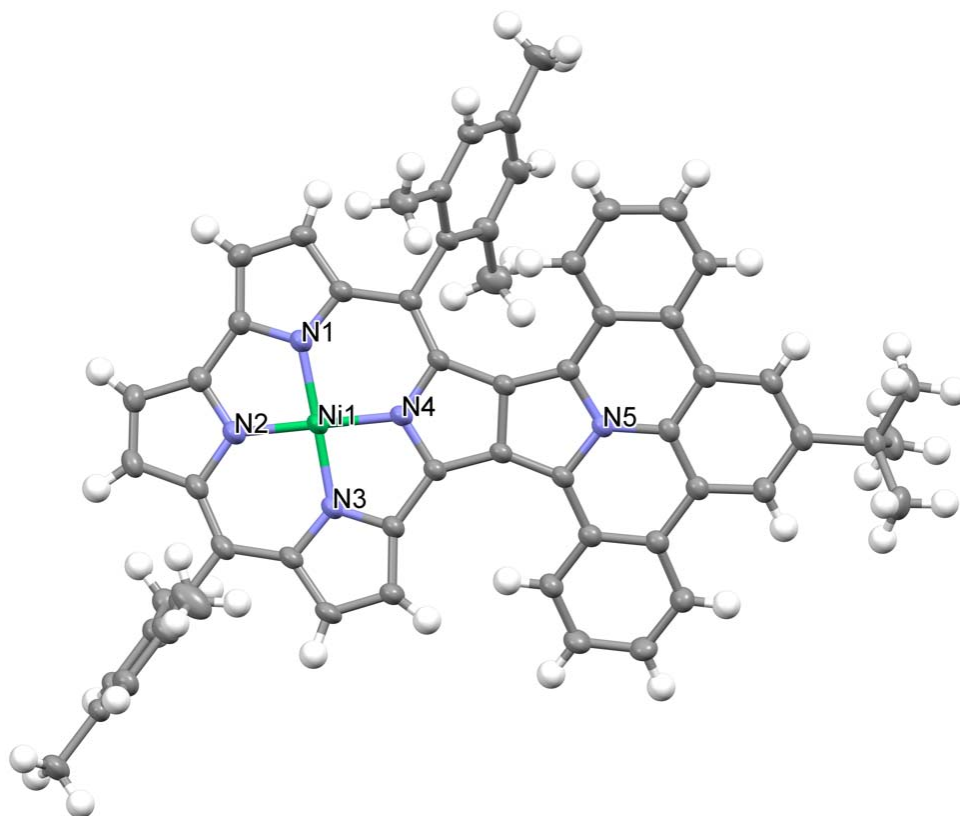

**Figure S160.** Perspective plot (thermal ellipsoids are set at a 50% probability level) of the molecular structure of 6.

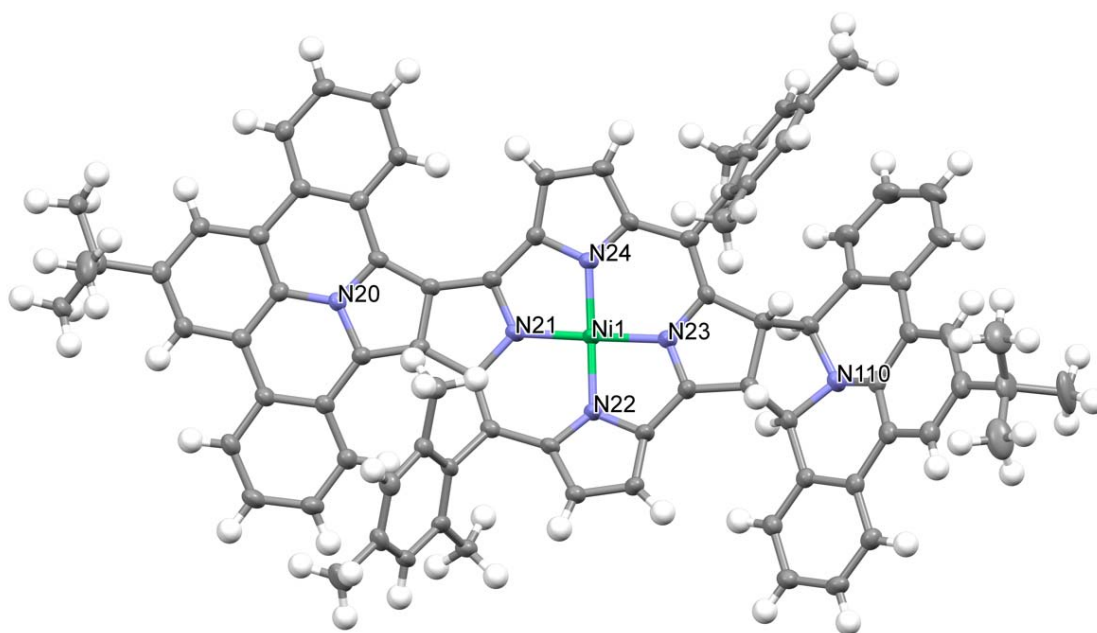

**Figure S161.** Perspective plot (thermal ellipsoids are set at a 50% probability level) of the molecular structure of **7**.

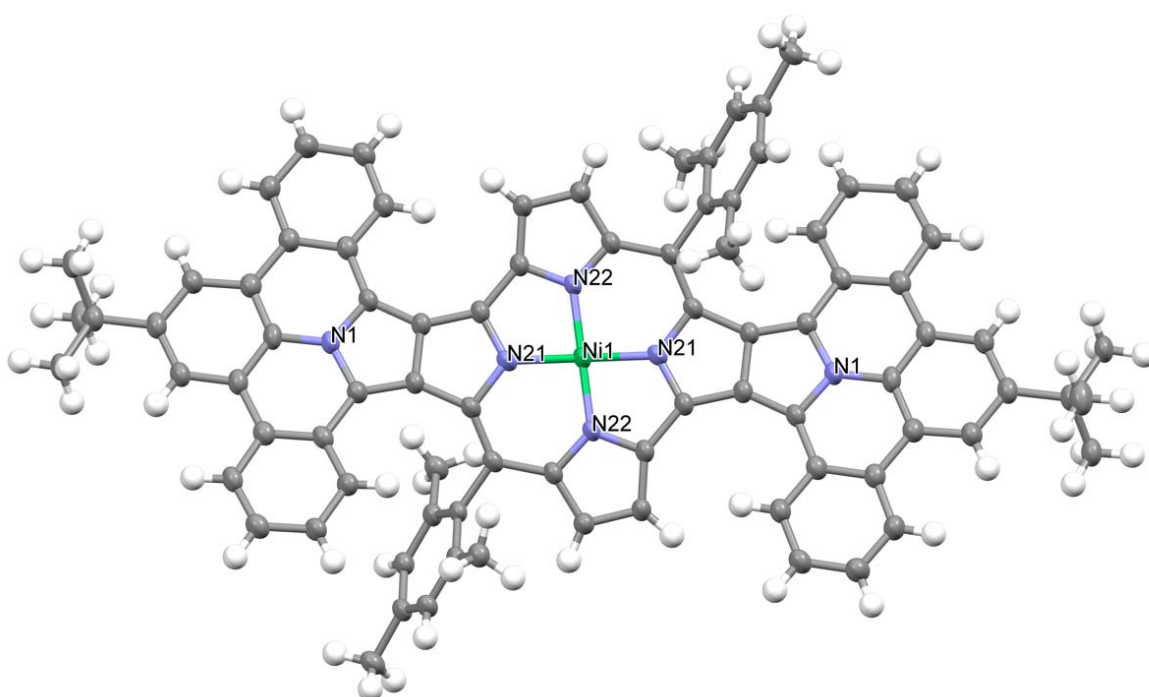

**Figure S162.** Perspective plot (thermal ellipsoids are set at a 50% probability level) of the molecular structure of **8**.

**Table S17.** Computational details for the optimized structures of compounds

| Structure /<br>Name <sup>[a]</sup> | SCF E        | ZPV <sup>[b]</sup> | lowest<br>freq.  | E            | $\Delta H$   | $\Delta G$ <sup>[c]</sup> | $\Delta G_{rel}$ | HOMO  | LUMO  | HLG  |
|------------------------------------|--------------|--------------------|------------------|--------------|--------------|---------------------------|------------------|-------|-------|------|
|                                    | a.u.         | a.u.               | cm <sup>-1</sup> | a.u.         | a.u.         | a.u.                      | kcal/mol         | eV    | eV    | eV   |
| <b>2a</b> / oof_2a                 | -4304.083881 | 0.960343           | 11.78            | -4303.065811 | -4303.064866 | -4303.217546              | 0.00             | -4.92 | -3.23 | 1.68 |
| <b>2b</b> / oof_2b                 | -4304.083194 | 0.960356           | 11.32            | -4303.065182 | -4303.064238 | -4303.216103              | 0.91             | -4.85 | -3.20 | 1.65 |
| <b>3</b> -uduu/<br>oof_3cduuu      | -5286.290626 | 1.352              | 9.43             | -5284.862444 | -5284.8615   | -5285.048115              | 0.00             | -4.67 | -2.61 | 2.06 |
| <b>3</b> -udud /<br>oof_3buddu     | -5286.270624 | 1.351038           | 8.733            | -5284.842552 | -5284.841608 | -5285.033904              | 8.92             | -4.81 | -2.69 | 2.12 |
| <b>3</b> -duud /<br>oof_3auddu     | -5286.265403 | 1.35102            | 7.153            | -5284.837428 | -5284.836484 | -5285.028451              | 12.34            | -4.76 | -2.68 | 2.08 |
| <b>4</b> / oof_4                   | -4099.578405 | 0.95767            | 10.75            | -4098.565695 | -4098.564751 | -4098.710939              | 0.00             | -4.40 | -2.85 | 1.55 |
| <b>6</b> / oof_5                   | -4097.177997 | 0.910181           | 12.05            | -4096.212843 | -4096.211898 | -4096.358148              | 0.00             | -4.26 | -2.92 | 1.35 |
| <b>5</b> -uduu/<br>oof_6duuu       | -5081.784191 | 1.349354           | 9.05             | -5080.361375 | -5080.36043  | -5080.540696              | 0.00             | -4.26 | -2.27 | 1.98 |
| <b>5</b> -udud/<br>oof_6dud        | -5081.766911 | 1.348664           | 9.07             | -5080.344026 | -5080.343082 | -5080.528343              | 7.75             | -4.37 | -2.31 | 2.06 |
| <b>7</b> / oof_7                   | -5079.362409 | 1.30122            | 8.22             | -5077.987075 | -5077.986131 | -5078.17103               | 0.00             | -4.23 | -2.53 | 1.70 |
| <b>8</b> / oof_8                   | -5076.960674 | 1.253867           | 7.09             | -5075.632815 | -5075.631871 | -5075.816645              | 0.00             | -4.13 | -2.64 | 1.48 |
| <b>8b</b> / oof_8b                 | -5076.958747 | 1.253825           | 7.44             | -5075.630877 | -5075.629932 | -5075.814875              | 1.11             | -4.11 | -2.65 | 1.46 |

[a] Data set name (Cartesian coordinated available as \*.pdb files). [b] Zero-point vibrational energy. [c] Gibbs free energy.

**Table S18.** Normal-coordinate structure decomposition analyses of deviations from planarity in selected norcorrole derivatives.<sup>a</sup>

| Compound (structure)                      | <i>dom</i> [Å] | <i>sad</i> [Å] | <i>ruf</i> [Å] | <i>wav X</i> [Å] | <i>wav Y</i> [Å] | <i>pro</i> [Å] | <i>D</i> <sub>oop</sub> [Å] |
|-------------------------------------------|----------------|----------------|----------------|------------------|------------------|----------------|-----------------------------|
| <b>2a (DFT)</b>                           | 0.875          | 0.461          | 0.092          | 0.247            | 0.003            | 0.100          | 0.875                       |
| <b>2b (DFT)</b>                           | 0.922          | 0.074          | 0.008          | 0.265            | 0.034            | 0.017          | 0.963                       |
| <b>4 (XRD)</b>                            | 0.508          | 0.02           | 0.252          | 0.065            | 0.048            | 0.074          | 0.601                       |
| <b>4 (DFT)</b>                            | 1.017          | 0.224          | 0.031          | 0.11             | 0.004            | 0.057          | 1.017                       |
| <b>3-udud (XRD)</b>                       | 1.049          | 0.456          | 0.373          | 0.025            | 0.061            | 0.056          | 1.225                       |
| <b>3-udud (DFT)</b>                       | 0.952          | 0.567          | 0.128          | 0.010            | 0.043            | 0.163          | 1.143                       |
| <b>3-duud (XRD)</b>                       | 0.000          | 0.000          | 0.000          | 0.186            | 0.132            | 0.000          | 0.259                       |
| <b>3-duud (DFT)</b>                       | 0.041          | 0.212          | 0.023          | 0.218            | 0.135            | 0.055          | 0.375                       |
| <b>3-uduu (DFT)</b>                       | 0.588          | 0.840          | 0.275          | 0.048            | 0.014            | 0.129          | 1.073                       |
| <b>5-udud (XRD)</b>                       | 1.204          | 0.290          | 0.315          | 0.045            | 0.066            | 0.044          | 1.204                       |
| <b>5-udud (DFT)</b>                       | 1.033          | 0.354          | 0.095          | 0.000            | 0.000            | 0.093          | 1.101                       |
| <b>5-uduu (XRD)</b>                       | 0.737          | 0.289          | 0.102          | 0.132            | 0.021            | 0.056          | 0.819                       |
| <b>5-uduu (DFT)</b>                       | 0.656          | 0.658          | 0.221          | 0.128            | 0.009            | 0.089          | 0.968                       |
| <b>6 (XRD)</b>                            | 0.059          | 0.113          | 0.162          | 0.120            | 0.203            | 0.078          | 0.361                       |
| <b>6 (DFT)</b>                            | 0.617          | 0.086          | 0.123          | 0.259            | 0.218            | 0.082          | 0.739                       |
| <b>7 (XRD)</b>                            | 0.732          | 0.495          | 0.162          | 0.149            | 0.071            | 0.099          | 0.934                       |
| <b>7 (DFT)</b>                            | 0.799          | 0.267          | 0.231          | 0.155            | 0.118            | 0.129          | 0.910                       |
| <b>8 (XRD)</b>                            | 0.000          | 0.000          | 0.000          | 0.185            | 0.303            | 0.000          | 0.459                       |
| <b>8 (DFT)</b>                            | 0.001          | 0.001          | 0.000          | 0.357            | 0.464            | 0.000          | 0.641                       |
| <b>8b (DFT)<sup>b</sup></b>               | 0.577          | 0.179          | 0.366          | 0.000            | 0.000            | 0.163          | 0.734                       |
| <b>1-H (XRD)<sup>c</sup></b>              | 0.000          | 0.000          | 0.000          | 0.226            | 0.025            | 0.000          | 0.241                       |
| <b>1-H (DFT)<sup>d</sup></b>              | 0.619          | 0.001          | 0.000          | 0.000            | 0.001            | 0.000          | 0.619                       |
| <b>1-NO<sub>2</sub> (XRD)<sup>d</sup></b> | 0.149          | 0.018          | 0.004          | 0.173            | 0.028            | 0.038          | 0.251                       |
| <b>1-NO<sub>2</sub> (DFT)<sup>d</sup></b> | 0.549          | 0.11           | 0.011          | 0.131            | 0.005            | 0.020          | 0.578                       |
| <b>NCRPd (XRD)<sup>e</sup></b>            | 1.696          | 0.045          | 0.036          | 0.044            | 0.072            | 0.004          | 1.699                       |

[a] absolute values of doming (*dom*), saddling (*sad*), ruffling (*ruf*), waving (*wav X* and *wav Y*), and propelling (*pro*) distortions. *D*<sub>oop</sub> is the total out-of-plane displacement. [b] data calculated for 1.1 kcal/mol less stable non-centrosymmetric conformer of **8**. [c] Calculated for XRD data from T. Ito, Y. Hayashi, S. Shimizu, J.-Y. Shin, N. Kobayashi, and H. Shinokubo, *Angew.Chem.Int.Ed.*, 2012, **51**, 8542. [d] Calculated for the data from Z. Deng, X. Li, M. Stepień, and P. J. Chmielewski, *Chem.Eur.J.*, 2016, **22**, 4231. [e] Calculated for the data from T. Yonezawa, S. A. Shafie, S. Hiroto, and H. Shinokubo, *Angew.Chem.Int.Ed.*, 2017, **56**, 11822.

**Table S19.** Electrochemical data for the compounds **1-8** (CH<sub>2</sub>Cl<sub>2</sub>, electrode potentials in volts vs, Fc/Fc<sup>+</sup>)

| Compd.                           | $E_{\text{Red}2}$    | $E_{\text{Red}1}$ | $E_{\text{Ox}1}$     | $E_{\text{Ox}2}$    | $E_{\text{Ox}3}$    | $E_{\text{Ox}4}$    | $\Delta E^{[c]}$ |
|----------------------------------|----------------------|-------------------|----------------------|---------------------|---------------------|---------------------|------------------|
| 1-H <sup>[b]</sup>               | -1.68                | -0.91             | 0.16                 | 0.74                | -                   | -                   | 1.07             |
| 1-NO <sub>2</sub> <sup>[b]</sup> | -1.28                | -0.69             | 0.47                 | 0.87                | -                   | -                   | 1.16             |
| 2a                               | -1.65                | -1.05             | 0.23 <sup>[a]</sup>  | 0.59 <sup>[a]</sup> | -                   | 1.00 <sup>[a]</sup> | 1.28             |
| 2b                               | -1.69                | -1.04             | 0.33 <sup>[a]</sup>  | 0.53 <sup>[a]</sup> | -                   | 1.03 <sup>[a]</sup> | 1.37             |
| 3-udud                           | -2.37                | -1.55             | 0.26 <sup>[a]</sup>  | 0.39 <sup>[a]</sup> | 0.67 <sup>[a]</sup> | 1.08 <sup>[a]</sup> | 1.81             |
| 3-duud                           | -                    | -1.55             | 0.22 <sup>[a]</sup>  | 0.36 <sup>[a]</sup> | 0.66 <sup>[a]</sup> | 1.05 <sup>[a]</sup> | 1.77             |
| 3-uduu                           | -2.37 <sup>[a]</sup> | -1.69             | 0.14 <sup>[a]</sup>  | 0.37 <sup>[a]</sup> | 0.67 <sup>[a]</sup> | 1.09 <sup>[a]</sup> | 1.73             |
| 4                                | -2.01                | -1.29             | -0.04 <sup>[a]</sup> | 0.37 <sup>[a]</sup> | 0.81 <sup>[a]</sup> | -                   | 1.25             |
| 5-udud                           | -                    | -1.82             | -0.03                | 0.51 <sup>[a]</sup> | 0.96 <sup>[a]</sup> | -                   | 1.79             |
| 5-uduu                           | -                    | -1.97             | -0.16                | 0.50 <sup>[a]</sup> | 0.91 <sup>[a]</sup> | -                   | 1.81             |
| 6                                | -1.72                | -1.13             | -0.09                | 0.41                | 0.78 <sup>[a]</sup> | 1.28 <sup>[a]</sup> | 1.04             |
| 7                                | -2.02                | -1.49             | -0.12                | 0.44 <sup>[a]</sup> | 0.79 <sup>[a]</sup> | -                   | 1.37             |
| 8                                | -1.77                | -1.34             | -0.18                | 0.31                | -                   | -                   | 1.16             |

[a] Irreversible process. [b] Data from Z. Deng, X. Li, M. Stępień, and P. J. Chmielewski, *Chem.Eur.J.*, 2016, **22**, 4231. [c]  $\Delta E = E_{\text{Ox}1} - E_{\text{Red}1}$

## References

- [1] G. M. Sheldrick, *Acta Cryst.* **2008**, A64 112-122.
- [2] C. B. Hübschle, G. M. Sheldrick, B. Dittrich, *J.Appl.Cryst.* **2011**, 44 1281-1284.
- [3] Frisch, M. J., Trucks, G. W., Schlegel, H. B., Scuseria, G. E., Robb, M. A., Cheeseman, J. R., Montgomery, J. A., Vreven, T, Kudin, K. N., Burant, J. C., Millam, J. M., Iyengar, S. S., Tomasi, J., Barone, V., Mennucci, B., Cossi, M., Scalmani, G., Rega, N., Petersson, G. A., Nakatsuji, H., Hada, M., Ehara, M., Toyota, K., Fukuda, R., Hasegawa, J., Ishida, M., Nakajima, T., Honda, Y., Kitao, O., Nakai, H., Klene, M., Li, X., Knox, J. E., Hratchian, H. P., Cross, J. B., Adamo, C., Jaramillo, J., Gomperts, R., Stratmann, R. E., Zazyev, O., Austin, A. J., Cammi, R., Pomelli, C., Ochterski, J., Ayala, P. Y., Morokuma, K., Voth, G. A., Salvador, P., Dannenberg, J. J., Zakrzewski, V. G., Dapprich, S., Daniels, A. D., Strain, M. C., Farkas, O., Malick, D. K., Rabuck, A. D., Raghavachari, K., Foresman, J. B., Ortiz, J. V., Cui, Q., Baboul, A. G., Clifford, S., Cioslowski, J., Stefanov, B. B., Liu, G., Liashenko, A., Piskorz, P., Komaromi, I., Martin, R. L., Fox, D. J., Keith, T., Al-Laham, M. A., Peng, C. Y., Nanayakkara, A., Challacombe, M., Gill, P. M. W., Johnson, B. G., Chen, W., Wong, M. W., Gonzales, C., and Pople, J. A. Gaussian 03. [Revision C.01]. 2004. Pittsburgh, PA.
- [4] A. D. Becke, *Phys.Rev.A* **1988**, 38 3098-3100.
- [5] A. D. Becke, *J.Chem.Phys.* **1993**, 98 5648.
- [6] C. Lee, W. Yang, R. G. Parr, *Phys.Rev.B* **1988**, 37 785-789.
- [7] N. M. O'Boyle, A. L. Tenderholt, K. M. Langner, *J.Comp.Chem.* **2008**, 29 839-845.
- [8] T. Ito, Y. Hayashi, S. Shimizu, J.-Y. Shin, N. Kobayashi, H. Shinokubo, *Angew.Chem.Int.Ed.* **2012**, 51 8542-8545.
- [9] Z. Deng, X. Li, M. Stępień, P. J. Chmielewski, *Chem.Eur.J.* **2016**, 22 4231-4246.
- [10] S. Ito, Y. Tokimaru, K. Nozaki, *Chem.Commun.* **2015**, 51 221-224.
- [11] J. Krumsieck, M. Bröring, *Chem.Eur.J.* **2021**, 27 11580-11588.
- [12] W. Jentzen, X.-Z. Song, J. A. Shelnut, *J.Phys.Chem.B* **1997**, 101 1684-1699.
- [13] W. Jentzen, J.-G. Ma, J. A. Shelnut, *Biophys.J.* **1998**, 74 753-763.
- [14] T. Yonezawa, S. A. Shafie, S. Hiroto, H. Shinokubo, *Angew.Chem.Int.Ed.* **2017**, 56 11822-11825.
